# Supplementary material
Source: Research Square preprint supplement (doi:10.21203/rs.3.rs-8783803/v1)
Supplement: Supplementary file 1 [file 0ecc2e08a354d2ab5170a412.docx]

Data Description

This paper conducts an empirical analysis using panel data from 31 Chinese provinces from 2011 to 2022. Digital finance data are sourced from the Digital Financial Inclusion Index compiled by the Peking University Digital Finance Research Center, accessible via the provided lin (<https://www.idf.pku.edu.cn/zsbz/bjdxszphjrzs/index.htm>). Data on agricultural economic resilience and control variables are obtained from the China Statistical Yearboo (<https://www.stats.gov.cn/sj/ndsj/>), China Rural Statistical Yearbook, China Population and Employment Statistical Yearbook, China Labor Statistical Yearbook, as well as provincial statistical yearbooks and bulletins. A small number of missing values are imputed using interpolation. All raw data are provided in Excel format.

The assessment of rural household economic resilience is conducted using Jupyter Notebook. The code file jupyter code1 corresponds to Figure 1, while jupyte code2 corresponds to Figures 2 and 3. The empirical analysis is performed using Stata 16.0, and the related code is provided under the file name stata code.
