# Supplementary material
Source: Research Square preprint supplement (doi:10.21203/rs.3.rs-8783803/v1)
Supplement: Supplementary file 2 [file 9e719582879b7d1e7e3d825e.xlsx]

## Sheet: merge data
地区	时间	HLH	GJH	地区2	year	zon	zon1	zon2	zon3	GAS	HC	ES	RINF	MA	行政区划	TI	CB	UD	DL	v1	v2	v3	v4	v5	v6	v7	v8	v9	v10	v11	w1	w2	w3	w4	w5	w6	w7	w8	w9	w10	w11	M	id	GAS2	HC2	ES2	RINF2	MA2
上海	2011	2.81779	2.08623	上海	2011	20009.7	126.4	8169.3	11713.9	0.0412631	8.3461	1.30254	9.39964	6.14868	上海	0.8019	0.9885	0.8624	0.0758	15737	10103	199.61	0.3786	3.97455	11.97	126.4	4962.07	12.9	0.309978	41	0.0392159	0.030727	0.0712418	0.0143319	0.0228296	0.00930875	0.060374	0.0591401	0.0165325	0.0612724	0.066526	0.119796	上海	-2.16436	1.05421	-0.733103	-2.72293	-0.470106
上海	2012	3.28728	2.12931	上海	2012	21305.6	129.3	8174.1	13002.1	0.0520958	8.4059	1.31444	9.43676	5.78352	上海	1.5077	1.4935	1.7472	1.1194	17452	10947	199.02	0.56463	3.56285	10.99	129.3	5117.62	7	0.331889	43	0.0392159	0.030727	0.0712418	0.0143319	0.0228296	0.00930875	0.060374	0.0591401	0.0165325	0.0612724	0.066526	0.119946	上海	-1.84683	1.54924	-0.721768	-2.67883	-0.775829
上海	2013	4.54434	2.18893	上海	2013	23204.1	131.6	8286.5	14786	0.0413482	8.024	1.34231	9.44407	5.87577	上海	2.2214	1.8731	2.8093	2.303	19208	13016	184.09	0.30357	3.45763	10.78	131.6	5647.8	6.7	0.347559	43	0.0392159	0.030727	0.0712418	0.0143319	0.0228296	0.00930875	0.060374	0.0591401	0.0165325	0.0612724	0.066526	0.172488	上海	-2.16186	-1.61215	-0.695205	-2.67014	-0.698591
上海	2014	4.99718	2.25769	上海	2014	25269.8	132	8633.3	16504.5	0.0410973	8.063	1.3022	9.46846	6.03787	上海	2.3953	2.3702	2.4278	2.4188	21192	14820	184.09	0	3.14122	10.15	131.96	6016.43	9.8	0.368468	45	0.0392159	0.030727	0.0712418	0.0143319	0.0228296	0.00930875	0.060374	0.0591401	0.0165325	0.0612724	0.066526	0.185922	上海	-2.16922	-1.28931	-0.73343	-2.64116	-0.56288
上海	2015	6.95604	2.32148	上海	2015	26887	125.5	8408.7	18352.8	0.043183	8.165	1.16209	9.48759	6.09018	上海	2.7811	2.5898	2.5981	3.7454	23205	16152	188.21	0.41463	2.94631	9.92	125.53	6352.7	7.2	0.369895	47	0.0392159	0.030727	0.0712418	0.0143319	0.0228296	0.00930875	0.060374	0.0591401	0.0165325	0.0612724	0.066526	0.190003	上海	-2.10808	-0.444946	-0.866928	-2.61844	-0.519087
上海	2016	19.2847	2.44941	上海	2016	29887	114.3	8570.2	21202.4	0.0473208	8.204	1.11011	9.49492	6.1444	上海	2.8222	2.7425	2.8148	3.0994	25520	17071	189.81	0.70968	2.48369	9.13	114.34	6755.88	7.1	0.389427	49	0.0392159	0.030727	0.0712418	0.0143319	0.0228296	0.00930875	0.060374	0.0591401	0.0165325	0.0612724	0.066526	0.200446	上海	-1.9868	-0.122101	-0.916458	-2.60974	-0.473691
上海	2017	28.7493	2.50153	上海	2017	32925	110.8	9525.9	23288.3	0.0604866	8.234	1.08777	9.49717	6.23363	上海	3.3665	3.0589	3.9605	3.3031	27825	18090	190.76	0	2.33872	8.9	110.78	7246.6	6.5	0.403931	51	0.0392159	0.030727	0.0712418	0.0143319	0.0228296	0.00930875	0.060374	0.0591401	0.0165325	0.0612724	0.066526	0.223579	上海	-1.60088	0.126241	-0.937746	-2.60706	-0.398989
上海	2018	49.1282	2.5434	上海	2018	36011.8	104.8	10360.8	25546.3	0.0562627	8.115	1.07651	9.48086	6.35402	上海	3.7773	3.4633	4.004	4.4026	30375	19965	190.76	0.39726	3.00383	8.37	104.78	7623.42	6.6	0.3982	53	0.0392159	0.030727	0.0712418	0.0143319	0.0228296	0.00930875	0.060374	0.0591401	0.0165325	0.0612724	0.066526	0.230613	上海	-1.72469	-0.858849	-0.948479	-2.62644	-0.298192
上海	2019	32.2654	2.59894	上海	2019	37987.6	107.1	10193.6	27686.9	0.0639543	8.169	1.06682	9.47613	6.38587	上海	4.1028	3.7825	4.3991	4.6223	33195	22449	190.76	0	2.66616	7.53	107.1	8012.22	7.7	0.433452	55	0.0392159	0.030727	0.0712418	0.0143319	0.0228296	0.00930875	0.060374	0.0591401	0.0165325	0.0612724	0.066526	0.25437	上海	-1.49924	-0.411834	-0.957711	-2.63206	-0.271529
上海	2020	4186.56	2.63934	上海	2020	38963.3	107.7	10258.6	28597.1	0.0584786	8.171	1.05136	9.46627	6.01078	上海	4.3193	3.952	4.8868	4.5008	34911	22095	165.05	0	2.49863	6.89	107.7	8837.48	6.2	0.45736	57	0.0392159	0.030727	0.0712418	0.0143319	0.0228296	0.00930875	0.060374	0.0591401	0.0165325	0.0612724	0.066526	0.189418	上海	-1.65974	-0.395278	-0.972437	-2.64377	-0.585563
上海	2021	185.587	2.68505	上海	2021	43653.2	96.1	11366.7	32190.4	0.0540597	8.355	1.01101	9.47899	5.86278	上海	4.5375	4.1291	5.3776	4.3863	38521	27205	161.98	0.58233	2.573	6.59	96.1	9544.47	7.2	0.399849	59	0.0392159	0.030727	0.0712418	0.0143319	0.0228296	0.00930875	0.060374	0.0591401	0.0165325	0.0612724	0.066526	0.198975	上海	-1.78927	1.12789	-1.01088	-2.62865	-0.70947
上海	2022	103.155	2.70248	上海	2022	44809.1	100	11407.2	33302	0.0413734	8.373	1.0361	9.47309	5.59061	上海	4.7579	4.3149	5.8765	4.2757	39729	27430	160.62	0	2.6866	6.56	100	9449.03	7.4	0.389717	62	0.0392159	0.030727	0.0712418	0.0143319	0.0228296	0.00930875	0.060374	0.0591401	0.0165325	0.0612724	0.066526	0.21052	上海	-2.16113	1.27689	-0.98698	-2.63567	-0.937332
云南	2011	2.14648	1.46567	云南	2011	9523.1	1396.6	3811.4	4315.1	0.139883	8.3461	0.796615	12.2762	5.98519	云南	0.2491	0.0747	0.4839	0.3981	5170	4424	1634.24	0.38873	2.46726	200.47	1396.6	6191	35	0.219587	5866.84	0.0392159	0.030727	0.0712418	0.0143319	0.0228296	0.00930875	0.060374	0.0591401	0.0165325	0.0612724	0.066526	0.129833	云南	0.726356	1.05421	-1.21517	0.69436	-0.606981
云南	2012	2.03543	1.47798	云南	2012	11097.4	1640.4	4458.4	4998.6	0.145158	8.4059	0.953325	12.2971	6.14911	云南	0.8443	0.5278	1.1196	1.3891	5930	5045	1677.9	0.36805	2.32188	210.21	1640.43	7831.13	35.2	0.25037	6175.57	0.0392159	0.030727	0.0712418	0.0143319	0.0228296	0.00930875	0.060374	0.0591401	0.0165325	0.0612724	0.066526	0.143247	云南	0.880986	1.54924	-1.06585	0.719174	-0.469749
云南	2013	2.03664	1.47465	云南	2013	12825.5	1878.5	5000.5	5946.5	0.131568	8.024	1.11217	12.3147	6.28842	云南	1.379	0.9559	1.5355	2.4915	6724	5247	1660.27	0.4535	2.23056	219.02	1878.46	9968.3	35.3	0.2793	7393.81	0.0392159	0.030727	0.0712418	0.0143319	0.0228296	0.00930875	0.060374	0.0591401	0.0165325	0.0612724	0.066526	0.155762	云南	0.482643	-1.61215	-0.914498	0.740075	-0.353118
云南	2014	2.02842	1.48343	云南	2014	14041.7	2007.4	5376.5	6657.7	0.133946	8.063	1.20922	12.3476	6.43583	云南	1.6405	1.4722	1.443	2.5554	7456	6030	1708.97	0.5805	2.12839	226.86	2007.43	11498.5	37.1	0.298911	7734.45	0.0392159	0.030727	0.0712418	0.0143319	0.0228296	0.00930875	0.060374	0.0591401	0.0165325	0.0612724	0.066526	0.16408	云南	0.552346	-1.28931	-0.822023	0.779167	-0.229701
云南	2015	2.04428	1.49929	云南	2015	14960	2079.3	5491.7	7389	0.136122	8.165	1.29217	12.3716	6.54722	云南	2.0376	1.6796	1.5879	4.0367	8242	6830	1757.71	0.59068	2.04577	231.87	2079.31	13500.6	37.7	0.311176	8074.45	0.0392159	0.030727	0.0712418	0.0143319	0.0228296	0.00930875	0.060374	0.0591401	0.0165325	0.0612724	0.066526	0.175119	云南	0.616127	-0.444946	-0.742981	0.807742	-0.136446
云南	2016	2.18683	1.5031	云南	2016	16369	2225.5	5747.4	8396.1	0.142048	8.204	1.43082	12.3802	6.66721	云南	2.1734	1.8537	2.0317	3.4865	9020	7331	1809.39	0.50351	1.97249	235.58	2225.49	16119.4	38	0.334865	8540.74	0.0392159	0.030727	0.0712418	0.0143319	0.0228296	0.00930875	0.060374	0.0591401	0.0165325	0.0612724	0.066526	0.18944	云南	0.789834	-0.122101	-0.610868	0.817991	-0.0359834
云南	2017	2.236	1.51147	云南	2017	18486	2338.4	6317.8	9829.8	0.118121	8.234	1.53651	12.3989	6.7901	云南	2.5627	2.2354	2.8285	3.1608	9862	8027	1851.42	0.57329	1.92127	231.94	2338.37	18936	38.1	0.351741	9004.38	0.0392159	0.030727	0.0712418	0.0143319	0.0228296	0.00930875	0.060374	0.0591401	0.0165325	0.0612724	0.066526	0.199887	云南	0.0884756	0.126241	-0.510165	0.840209	0.0668992
云南	2018	2.32033	1.52007	云南	2018	20880.6	2498.7	7267.5	11114.5	0.138633	8.115	1.66224	12.4409	6.85393	云南	2.8579	2.6229	2.7884	3.7606	10768	9123	1898.07	0.62664	2.55829	217.37	2498.67	21132.6	38.2	0.370438	9517.65	0.0392159	0.030727	0.0712418	0.0143319	0.0228296	0.00930875	0.060374	0.0591401	0.0165325	0.0612724	0.066526	0.233257	云南	0.68973	-0.858849	-0.390369	0.890006	0.120343
云南	2019	2.52347	1.49027	云南	2019	23223.8	3037.7	8060.4	12125.7	0.16502	8.169	2.03981	12.4777	7.17411	云南	3.0346	2.8443	2.9112	3.8874	11902	10260	1922.49	0.34457	2.55631	204.03	3037.69	22928.8	41.5	0.446212	10047.7	0.0392159	0.030727	0.0712418	0.0143319	0.0228296	0.00930875	0.060374	0.0591401	0.0165325	0.0612724	0.066526	0.270093	云南	1.46318	-0.411834	-0.0305982	0.933719	0.388404
云南	2020	2.90443	1.4501	云南	2020	24555.7	3611.8	8387.5	12556.5	0.157747	8.171	2.51075	12.5861	7.14061	云南	3.1848	3.0246	3.0945	3.8778	12842	11069	1978.07	0.3431	2.50818	196.65	3611.8	24694.4	42.8	0.525704	10543.1	0.0392159	0.030727	0.0712418	0.0143319	0.0228296	0.00930875	0.060374	0.0591401	0.0165325	0.0612724	0.066526	0.292213	云南	1.24999	-0.395278	0.418132	1.0626	0.360357
云南	2021	3.32307	1.36457	云南	2021	27161.6	3831.3	9537.2	13793.1	0.138633	8.355	2.76671	12.6145	7.23447	云南	3.339	3.2074	3.2806	3.8725	14197	12386	1988.24	0.40885	2.48592	187.33	3831.3	25682.1	42.8	0.552978	11092.9	0.0392159	0.030727	0.0712418	0.0143319	0.0228296	0.00930875	0.060374	0.0591401	0.0165325	0.0612724	0.066526	0.302124	云南	0.689723	1.12789	0.662027	1.09628	0.438933
云南	2022	3.11349	1.25511	云南	2022	28556.1	4001.9	10120.3	14433.9	0.132606	8.373	2.92842	12.6638	7.24687	云南	3.4988	3.3951	3.4759	3.8732	15147	13309	2035.26	0.45917	2.44732	183.38	4001.9	27608.3	42.9	0.573596	11636.9	0.0392159	0.030727	0.0712418	0.0143319	0.0228296	0.00930875	0.060374	0.0591401	0.0165325	0.0612724	0.066526	0.313842	云南	0.513056	1.27689	0.816109	1.15483	0.449316
内蒙古	2011	3.76835	1.58587	内蒙	2011	9458.1	1309.7	4044	4104.4	0.131031	8.3461	2.07806	11.9891	6.20799	内蒙古	0.2889	0.2465	0.3027	0.4035	6942	6880	3072.39	0.44618	2.37637	176.94	1309.72	10365.2	32.3	0.173712	11219.3	0.0392159	0.030727	0.0712418	0.0143319	0.0228296	0.00930875	0.060374	0.0591401	0.0165325	0.0612724	0.066526	0.165692	内蒙	0.466908	1.05421	0.00584989	0.353351	-0.420456
内蒙古	2012	3.48628	1.57039	内蒙	2012	10470.1	1453.2	4553.6	4463.3	0.131591	8.4059	2.39166	12.0062	6.33965	内蒙古	0.9168	0.7503	0.9544	1.3978	7956	7972	3125.24	0.6607	2.33827	189.04	1453.22	11875.7	31.7	0.189445	11574.6	0.0392159	0.030727	0.0712418	0.0143319	0.0228296	0.00930875	0.060374	0.0591401	0.0165325	0.0612724	0.066526	0.172352	内蒙	0.483319	1.54924	0.304664	0.373603	-0.310221
内蒙古	2013	2.97318	1.58097	内蒙	2013	11392.4	1582.9	4870.1	4939.4	0.126564	8.024	2.73968	12.0288	6.45975	内蒙古	1.4659	1.1637	1.3884	2.6045	8985	9080	2957.76	0.49524	2.28039	202.42	1582.87	14217.4	32.9	0.205201	11876.3	0.0392159	0.030727	0.0712418	0.0143319	0.0228296	0.00930875	0.060374	0.0591401	0.0165325	0.0612724	0.066526	0.184501	内蒙	0.335958	-1.61215	0.636264	0.400513	-0.209676
内蒙古	2014	2.81	1.57502	内蒙	2014	12158.2	1638	5114.4	5405.8	0.133426	8.063	2.9151	12.0562	6.56273	内蒙古	1.7256	1.6546	1.1488	3.0084	9976	9972	3011.88	0.60933	2.22408	222.67	1638.02	17591.8	33.9	0.205704	12210.8	0.0392159	0.030727	0.0712418	0.0143319	0.0228296	0.00930875	0.060374	0.0591401	0.0165325	0.0612724	0.066526	0.193491	内蒙	0.5371	-1.28931	0.803413	0.433055	-0.12346
内蒙古	2015	2.47637	1.58949	内蒙	2015	12949	1630.2	5269.5	6049.2	0.158849	8.165	2.98482	12.0747	6.63948	内蒙古	2.1455	1.8534	1.3604	4.5366	10776	10637	3086.9	0.6444	2.21378	229.35	1630.21	13702.2	33.9	0.196506	12597.2	0.0392159	0.030727	0.0712418	0.0143319	0.0228296	0.00930875	0.060374	0.0591401	0.0165325	0.0612724	0.066526	0.200991	内蒙	1.28231	-0.444946	0.869854	0.45498	-0.0591975
内蒙古	2016	2.21792	1.61026	内蒙	2016	13789.3	1650.6	5579.8	6558.9	0.161548	8.204	3.14405	12.1862	6.73981	内蒙古	2.2993	2.02	1.8489	4.04	11609	11463	3131.53	0.62743	2.68897	234.64	1650.56	15080	34	0.187223	13083.3	0.0392159	0.030727	0.0712418	0.0143319	0.0228296	0.00930875	0.060374	0.0591401	0.0165325	0.0612724	0.066526	0.214017	内蒙	1.36141	-0.122101	1.02157	0.587446	0.0247976
内蒙古	2017	1.94959	1.6368	内蒙	2017	14898.1	1649.8	5874.3	7374	0.178305	8.234	3.26586	12.2032	6.55905	内蒙古	2.585	2.3892	2.492	3.401	12584	12184	3174.83	0.61726	2.58765	235.04	1649.77	14013.2	28.9	0.186117	13551	0.0392159	0.030727	0.0712418	0.0143319	0.0228296	0.00930875	0.060374	0.0591401	0.0165325	0.0612724	0.066526	0.220218	内蒙	1.85259	0.126241	1.13764	0.607645	-0.126539
内蒙古	2018	2.7076	1.36788	内蒙	2018	16140.8	1750.7	6335.4	8054.7	0.187099	8.115	3.57352	12.2192	6.813	内蒙古	2.7157	2.6949	2.3231	3.4976	13803	12661	3196.52	0.60092	2.40854	222.67	1750.67	10047.4	33.4	0.201698	14088.6	0.0392159	0.030727	0.0712418	0.0143319	0.0228296	0.00930875	0.060374	0.0591401	0.0165325	0.0612724	0.066526	0.228051	内蒙	2.11035	-0.858849	1.43079	0.626662	0.086078
内蒙古	2019	2.40122	1.36615	内蒙	2019	17212.5	1863.3	6763.1	8586.1	0.171485	8.169	3.92087	12.2361	6.3663	内蒙古	2.9389	2.9145	2.6031	3.6298	15283	13816	3199.19	0.42779	2.298	218.44	1863.3	10720.6	37.5	0.213112	14625	0.0392159	0.030727	0.0712418	0.0143319	0.0228296	0.00930875	0.060374	0.0591401	0.0165325	0.0612724	0.066526	0.239297	内蒙	1.65268	-0.411834	1.76176	0.646706	-0.287913
内蒙古	2020	2.20861	1.36711	内蒙	2020	17258	2028.8	6908.2	8321.1	0.164623	8.171	4.44439	12.2559	6.31825	内蒙古	3.0939	3.104	2.7566	3.674	16567	13594	3199.12	0.53163	2.18973	207.69	2028.8	10559.8	38.6	0.231909	15221.5	0.0392159	0.030727	0.0712418	0.0143319	0.0228296	0.00930875	0.060374	0.0591401	0.0165325	0.0612724	0.066526	0.245543	内蒙	1.45154	-0.395278	2.2606	0.670267	-0.328143
内蒙古	2021	2.09459	1.46952	内蒙	2021	21166	2353.9	9880.6	8931.5	0.15628	8.355	5.00042	12.2672	6.37843	内蒙古	3.2538	3.2956	2.9147	3.7211	18337	15691	4379.28	0.59224	2.06239	241.9	2353.9	11594.7	38.5	0.273065	15959.2	0.0392159	0.030727	0.0712418	0.0143319	0.0228296	0.00930875	0.060374	0.0591401	0.0165325	0.0612724	0.066526	0.268809	内蒙	1.20699	1.12789	2.7904	0.683674	-0.27776
内蒙古	2022	1.98572	1.50897	内蒙	2022	23388.9	2655.1	11352.5	9381.3	0.154974	8.373	5.72537	12.2838	6.36544	内蒙古	3.4228	3.497	3.0764	3.7712	19641	15444	4379.31	0.63467	1.9038	227.36	2655.1	13635.3	37.4	0.30969	16678.7	0.0392159	0.030727	0.0712418	0.0143319	0.0228296	0.00930875	0.060374	0.0591401	0.0165325	0.0612724	0.066526	0.279158	内蒙	1.16871	1.27689	3.48117	0.703473	-0.288633
北京	2011	1.49114	2.00605	北京	2011	17188.8	134.5	3563.3	13491	0.0577278	8.3461	1.30064	9.96867	4.70773	北京	0.7941	0.9753	0.7223	0.3259	13742	11086	209.33	0.32799	1.12602	13.84	134.5	5578.93	6.7	0.457103	579.8	0.0392159	0.030727	0.0712418	0.0143319	0.0228296	0.00930875	0.060374	0.0591401	0.0165325	0.0612724	0.066526	0.104276	北京	-1.68175	1.05421	-0.734909	-2.04693	-1.6765
北京	2012	1.47777	2.02751	北京	2012	19024.7	148.4	3856	15020.3	0.0604264	8.4059	1.38943	9.97544	4.80729	北京	1.5065	1.5556	1.5942	1.1847	15365	11888	207.54	0.66433	1.15317	13.67	148.4	6112.37	6.5	0.540949	602.8	0.0392159	0.030727	0.0712418	0.0143319	0.0228296	0.00930875	0.060374	0.0591401	0.0165325	0.0612724	0.066526	0.109819	北京	-1.60265	1.54924	-0.650309	-2.03889	-1.59314
北京	2013	1.56385	2.05799	北京	2013	21134.6	159.8	4168.3	16806.5	0.0713091	8.024	1.45793	9.98382	4.9712	北京	2.1562	1.9386	2.475	2.2957	17101	13564	153.02	0.4052	1.14236	12.78	159.8	6847.1	7.3	0.682709	630.8	0.0392159	0.030727	0.0712418	0.0143319	0.0228296	0.00930875	0.060374	0.0591401	0.0165325	0.0612724	0.066526	0.128672	北京	-1.28366	-1.61215	-0.585038	-2.02892	-1.45592
北京	2014	2.1651	2.16926	北京	2014	22926	159.2	4433	18333.9	0.0759547	8.063	1.4332	9.99191	5.74108	北京	2.3536	2.4392	2.1989	2.3522	18867	14535	143.11	0.68293	0.994279	11.64	159.2	6924.23	7.8	0.829737	670.8	0.0392159	0.030727	0.0712418	0.0143319	0.0228296	0.00930875	0.060374	0.0591401	0.0165325	0.0612724	0.066526	0.139062	北京	-1.14749	-1.28931	-0.608607	-2.01932	-0.81136
北京	2015	2.62543	2.25466	北京	2015	24779.1	140.4	4419.8	20218.9	0.0740332	8.165	1.2663	9.99356	5.78444	北京	2.7638	2.6839	2.3417	3.7948	20569	15811	137.35	0.82258	0.925235	10.53	140.4	7495.99	7.7	0.829557	710.8	0.0392159	0.030727	0.0712418	0.0143319	0.0228296	0.00930875	0.060374	0.0591401	0.0165325	0.0612724	0.066526	0.148217	北京	-1.20381	-0.444946	-0.767634	-2.01736	-0.775057
北京	2016	3.77737	2.36901	北京	2016	27041.2	129.8	4665.8	22245.7	0.0692314	8.204	1.16332	9.99998	5.79606	北京	2.8637	2.8565	2.6374	3.299	22310	17329	128.47	0.76081	1.00762	9.65	129.79	7943.89	7.6	0.908279	742.73	0.0392159	0.030727	0.0712418	0.0143319	0.0228296	0.00930875	0.060374	0.0591401	0.0165325	0.0612724	0.066526	0.164597	北京	-1.34456	-0.122101	-0.865761	-2.00973	-0.76533
北京	2017	4.93319	2.43518	北京	2017	29883	121.9	5049.4	24711.7	0.075954	8.234	1.07541	10.009	5.65913	北京	3.2994	3.1612	3.5724	3.2602	24240	18810	115.48	0.23881	0.90585	8.55	121.9	8370.44	9.6	1.02778	777.63	0.0392159	0.030727	0.0712418	0.0143319	0.0228296	0.00930875	0.060374	0.0591401	0.0165325	0.0612724	0.066526	0.186257	北京	-1.14751	0.126241	-0.949523	-1.99899	-0.879966
北京	2018	5.22906	2.46455	北京	2018	33106	120.6	5477.4	27508.1	0.077099	8.115	1.04903	10.0104	5.63515	北京	3.6854	3.5387	3.6678	4.2019	26490	20195	109.67	0.46809	0.826025	7.29	120.56	7910.07	11.5	1.18123	813.73	0.0392159	0.030727	0.0712418	0.0143319	0.0228296	0.00930875	0.060374	0.0591401	0.0165325	0.0612724	0.066526	0.19311	北京	-1.11394	-0.858849	-0.974661	-1.9974	-0.900048
北京	2019	5.39676	2.49238	北京	2019	35445.1	114.4	5667.4	29663.4	0.0789154	8.169	1.01697	10.0153	5.8999	北京	3.99	3.8466	4.0207	4.4083	28928	21881	109.24	0.08	0.720856	6.17	114.38	7712.31	17.4	1.32016	901.57	0.0392159	0.030727	0.0712418	0.0143319	0.0228296	0.00930875	0.060374	0.0591401	0.0165325	0.0612724	0.066526	0.215728	北京	-1.0607	-0.411834	-1.00521	-1.99154	-0.678394
北京	2020	6.95687	2.50324	北京	2020	35943.3	108.3	5739.1	30095.9	0.0698872	8.171	0.966361	10.0107	6.49587	北京	4.1788	3.97	4.4583	4.3602	30126	20913	109.35	0.875	0.816669	6.06	108.3	7881.99	20.1	1.12752	928.69	0.0392159	0.030727	0.0712418	0.0143319	0.0228296	0.00930875	0.060374	0.0591401	0.0165325	0.0612724	0.066526	0.207903	北京	-1.32534	-0.395278	-1.05343	-1.99696	-0.179434
北京	2021	5.64968	2.47369	北京	2021	41045.6	111.4	7389	33545.2	0.0690995	8.355	0.989028	10.0132	6.55664	北京	4.3758	4.1034	4.8959	4.3218	33303	23574	109.32	0.1	0.971959	6.3	111.4	8268.2	19.2	0.96224	977.98	0.0392159	0.030727	0.0712418	0.0143319	0.0228296	0.00930875	0.060374	0.0591401	0.0165325	0.0612724	0.066526	0.233428	北京	-1.34843	1.12789	-1.03183	-1.99398	-0.128559
北京	2022	4.50061	2.4428	北京	2022	41540.9	111.5	6635.6	34793.7	0.0619602	8.373	0.989594	10.0152	6.44794	北京	4.5748	4.239	5.3378	4.2897	34754	23745	112.14	0.3587	1.18714	6.61	111.5	8565.86	19.6	0.786454	990.99	0.0392159	0.030727	0.0712418	0.0143319	0.0228296	0.00930875	0.060374	0.0591401	0.0165325	0.0612724	0.066526	0.229594	北京	-1.55769	1.27689	-1.03129	-1.99169	-0.219562
吉林	2011	1.40773	1.68042	吉林	2011	7734.6	1105.9	2931.4	3697.4	0.116076	8.3461	1.59833	11.4269	6.10032	吉林	0.2451	0.2375	0.2404	0.2786	7634	5409	1807.52	0.35967	2.24932	195.2	1105.87	7441.71	22.1	0.21515	3639.15	0.0392159	0.030727	0.0712418	0.0143319	0.0228296	0.00930875	0.060374	0.0591401	0.0165325	0.0612724	0.066526	0.115166	吉林	0.0285528	1.05421	-0.451263	-0.314609	-0.510597
吉林	2012	1.29353	1.70749	吉林	2012	8678	1195.6	3315.2	4167.2	0.117878	8.4059	1.77926	11.4426	6.28563	吉林	0.8723	0.6943	0.9383	1.3399	8741	6307	1851.87	0.34497	2.12631	206.73	1195.63	9511.54	23.8	0.226713	3691.32	0.0392159	0.030727	0.0712418	0.0143319	0.0228296	0.00930875	0.060374	0.0591401	0.0165325	0.0612724	0.066526	0.124088	吉林	0.0813601	1.54924	-0.278866	-0.29593	-0.355454
吉林	2013	1.21591	1.72165	吉林	2013	9427.9	1250.2	3572.1	4605.5	0.11595	8.024	1.9277	11.4531	6.42907	吉林	1.3836	1.0685	1.4795	2.2497	9781	7523	1510.13	0.35526	2.06332	216.79	1250.24	9979.3	23.5	0.228406	1546.89	0.0392159	0.030727	0.0712418	0.0143319	0.0228296	0.00930875	0.060374	0.0591401	0.0165325	0.0612724	0.066526	0.117143	吉林	0.0248408	-1.61215	-0.137424	-0.283467	-0.235357
吉林	2014	1.17484	1.73459	吉林	2014	9966.5	1270.2	3804.9	4891.5	0.105957	8.063	2.01751	11.4725	6.54463	吉林	1.6562	1.5491	1.3601	2.5475	10780	8140	1628.43	0.46163	2.01792	226.66	1270.21	11339.6	23.5	0.222086	1670.21	0.0392159	0.030727	0.0712418	0.0143319	0.0228296	0.00930875	0.060374	0.0591401	0.0165325	0.0612724	0.066526	0.120989	吉林	-0.268057	-1.28931	-0.0518469	-0.260361	-0.13861
吉林	2015	1.12184	1.75061	吉林	2015	10018	1270.6	3837.8	4909.6	0.127012	8.165	2.07195	11.4858	6.65454	吉林	2.082	1.7549	1.5468	4.1347	11326	8783	1790.87	0.49007	1.90256	231.24	1270.64	12705.3	26	0.218259	1793.5	0.0392159	0.030727	0.0712418	0.0143319	0.0228296	0.00930875	0.060374	0.0591401	0.0165325	0.0612724	0.066526	0.130368	吉林	0.349093	-0.444946	2.99168e-05	-0.244571	-0.0465928
吉林	2016	1.08386	1.77211	吉林	2016	10427	1130.1	3901.4	5395.5	0.15351	8.204	2.04736	11.5375	6.75215	吉林	2.1707	1.9194	2.0414	3.2359	12123	9521	1832.17	0.61053	1.95257	233.61	1130.05	13923.2	26.2	0.193147	1987.1	0.0392159	0.030727	0.0712418	0.0143319	0.0228296	0.00930875	0.060374	0.0591401	0.0165325	0.0612724	0.066526	0.136635	吉林	1.12579	-0.122101	-0.0234032	-0.183222	0.035132
吉林	2017	1.00718	1.80053	吉林	2017	10922	1095.4	3995.5	5831.2	0.148903	8.234	2.02827	11.5511	6.6995	吉林	2.5476	2.2745	2.7362	3.1072	12950	10279	1893.05	0.53057	1.85292	231.02	1095.36	13283.9	25.6	0.186931	2180.7	0.0392159	0.030727	0.0712418	0.0143319	0.0228296	0.00930875	0.060374	0.0591401	0.0165325	0.0612724	0.066526	0.142519	吉林	0.990753	0.126241	-0.0415966	-0.166966	-0.00895034
吉林	2018	2.10081	1.54228	吉林	2018	11253.8	1160.7	4051.5	6041.6	0.141849	8.115	2.24583	11.5655	6.73364	吉林	2.7608	2.5655	2.5523	3.7846	13748	10826	1893.05	0.26135	1.75444	228.3	1160.71	13496.4	23.3	0.198162	2385.81	0.0392159	0.030727	0.0712418	0.0143319	0.0228296	0.00930875	0.060374	0.0591401	0.0165325	0.0612724	0.066526	0.150488	吉林	0.783998	-0.858849	0.165707	-0.149904	0.019632
吉林	2019	2.34642	1.50808	吉林	2019	11726.8	1287.3	4134.8	6304.7	0.143476	8.169	2.60111	11.5774	6.087	吉林	2.9277	2.7575	2.7593	3.7962	14936	11457	1909.5	0.36777	1.67419	227.06	1287.32	11310	30.6	0.217981	2594.45	0.0392159	0.030727	0.0712418	0.0143319	0.0228296	0.00930875	0.060374	0.0591401	0.0165325	0.0612724	0.066526	0.156248	吉林	0.831675	-0.411834	0.504235	-0.135775	-0.521746
吉林	2020	2.43046	1.47758	吉林	2020	12256	1553	4319.9	6383.1	0.139989	8.171	3.31984	11.5885	5.98695	吉林	3.0826	2.9078	2.9763	3.8529	16067	11864	1905.44	0.48483	1.57841	225.29	1553	12248.7	39.9	0.260218	2801.6	0.0392159	0.030727	0.0712418	0.0143319	0.0228296	0.00930875	0.060374	0.0591401	0.0165325	0.0612724	0.066526	0.168819	吉林	0.729486	-0.395278	1.18907	-0.122616	-0.605508
吉林	2021	2.67824	1.50726	吉林	2021	13163.8	1553.8	4768.3	6841.7	0.125058	8.355	3.4156	11.5963	6.12052	吉林	3.2413	3.0667	3.2032	3.9186	17642	13411	1918.95	0.19494	1.49113	223	1553.84	13596.1	39.9	0.259283	3004.09	0.0392159	0.030727	0.0712418	0.0143319	0.0228296	0.00930875	0.060374	0.0591401	0.0165325	0.0612724	0.066526	0.177129	吉林	0.291825	1.12789	1.28031	-0.113366	-0.493686
吉林	2022	2.86115	1.47473	吉林	2022	12818.1	1689.1	4370.2	6758.7	0.12747	8.373	3.77906	11.6061	6.03572	吉林	3.4001	3.233	3.4401	3.9879	18134	12729	1906.48	0.39741	1.42877	222.75	1689.1	13269.8	41.5	0.279826	3230.31	0.0392159	0.030727	0.0712418	0.0143319	0.0228296	0.00930875	0.060374	0.0591401	0.0165325	0.0612724	0.066526	0.178796	吉林	0.362521	1.27689	1.62664	-0.101728	-0.56468
四川	2011	2.05064	1.64078	四川	2011	21050.9	2854.6	10014.4	8181.9	0.116729	8.3461	1.05198	12.5541	7.34536	四川	0.4016	0.2902	0.5856	0.435	6505	5458	2600.75	0.4716	2.68976	251.23	2854.62	14222.2	38.2	0.314734	6536.19	0.0392159	0.030727	0.0712418	0.0143319	0.0228296	0.00930875	0.060374	0.0591401	0.0165325	0.0612724	0.066526	0.209416	四川	0.0476902	1.05421	-0.971849	1.02459	0.53178
四川	2012	2.19021	1.61298	四川	2012	23922.4	3142.6	11231.1	9548.8	0.120152	8.4059	1.18627	12.5896	7.47969	四川	1.0013	0.7436	1.265	1.3731	7432	6265	2662.65	0.42165	2.52288	253.03	3142.55	17040	38.5	0.343245	6744.39	0.0392159	0.030727	0.0712418	0.0143319	0.0228296	0.00930875	0.060374	0.0591401	0.0165325	0.0612724	0.066526	0.229742	四川	0.148031	1.54924	-0.843889	1.06674	0.644244
四川	2013	2.06343	1.63955	四川	2013	26518	3257.4	12418.9	10841.7	0.11924	8.024	1.2593	12.6176	7.6186	四川	1.5304	1.1403	1.7671	2.3882	8381	7365	2616.54	0.33558	2.37073	251.14	3257.42	20326.1	39.3	0.354643	7792.14	0.0392159	0.030727	0.0712418	0.0143319	0.0228296	0.00930875	0.060374	0.0591401	0.0165325	0.0612724	0.066526	0.248668	四川	0.121278	-1.61215	-0.774301	1.09993	0.760534
四川	2014	2.06807	1.65312	四川	2014	28891.3	3524.7	13082.7	12283.9	0.121618	8.063	1.35234	12.6435	7.78643	四川	1.7382	1.6258	1.5982	2.3639	9348	8301	2666.32	0.40052	2.25419	250.19	3524.74	23318.6	40.6	0.383751	8159.15	0.0392159	0.030727	0.0712418	0.0143319	0.0228296	0.00930875	0.060374	0.0591401	0.0165325	0.0612724	0.066526	0.266959	四川	0.190987	-1.28931	-0.685651	1.13073	0.901046
四川	2015	2.08093	1.65218	四川	2015	30342	3661	13192.5	13488.6	0.123594	8.165	1.50421	12.6622	7.91063	四川	2.1548	1.8208	1.7654	3.9651	10247	9251	2735.09	0.4059	2.14575	249.83	3660.96	25525.9	41.5	0.396305	8510.33	0.0392159	0.030727	0.0712418	0.0143319	0.0228296	0.00930875	0.060374	0.0591401	0.0165325	0.0612724	0.066526	0.30128	四川	0.248919	-0.444946	-0.540945	1.15292	1.00503
四川	2016	2.10968	1.66938	四川	2016	33138.5	3900.6	13450.1	15787.8	0.123452	8.204	1.65219	12.6889	8.02829	四川	2.2541	1.97	2.1654	3.3538	11203	10192	2813.55	0.58962	2.22477	248.98	3900.6	28812	42	0.420474	8980.33	0.0392159	0.030727	0.0712418	0.0143319	0.0228296	0.00930875	0.060374	0.0591401	0.0165325	0.0612724	0.066526	0.328121	四川	0.244733	-0.122101	-0.399944	1.1847	1.10354
四川	2017	2.05624	1.69568	四川	2017	37905.1	4262.5	14569.2	19073.5	0.117672	8.234	1.74019	12.7067	8.14218	四川	2.678	2.3187	3.0154	3.2514	12227	11397	2873.1	0.60686	2.16615	241.95	4262.51	31902.1	42.1	0.455904	9456.96	0.0392159	0.030727	0.0712418	0.0143319	0.0228296	0.00930875	0.060374	0.0591401	0.0165325	0.0612724	0.066526	0.35726	四川	0.0753239	0.126241	-0.316088	1.20581	1.19889
四川	2018	2.3865	1.67098	四川	2018	42902.1	4427.4	16056.9	22417.7	0.135039	8.115	1.85982	12.7117	8.25956	四川	2.943	2.6615	2.9583	3.8451	13331	12723	2932.54	0.60971	2.08853	235.21	4427.43	35156.1	43.5	0.47261	9961.81	0.0392159	0.030727	0.0712418	0.0143319	0.0228296	0.00930875	0.060374	0.0591401	0.0165325	0.0612724	0.066526	0.390518	四川	0.584378	-0.858849	-0.2021	1.21171	1.29716
四川	2019	2.4217	1.67089	四川	2019	46363.8	4807.5	17187.9	24368.3	0.124507	8.169	2.11624	12.7281	8.32303	四川	3.1711	2.9122	3.1953	3.9823	14670	14056	2954.09	0.40797	2.07013	222.77	4807.5	38179.5	44.4	0.509441	10463.6	0.0392159	0.030727	0.0712418	0.0143319	0.0228296	0.00930875	0.060374	0.0591401	0.0165325	0.0612724	0.066526	0.419345	四川	0.275671	-0.411834	0.0422289	1.23126	1.3503
四川	2020	2.49538	1.63636	四川	2020	48501.6	5556.9	17505.6	25439.2	0.119601	8.171	2.54456	12.885	8.2123	四川	3.3482	3.1076	3.4486	3.9605	15929	14953	2992.24	0.36443	2.07192	210.82	5556.58	39248.6	45.4	0.578808	10974.6	0.0392159	0.030727	0.0712418	0.0143319	0.0228296	0.00930875	0.060374	0.0591401	0.0165325	0.0612724	0.066526	0.458507	四川	0.131875	-0.395278	0.450351	1.41769	1.25759
四川	2021	2.54278	1.66628	四川	2021	54088	5662	19949.7	28476.2	0.118593	8.355	2.65719	12.8965	8.34213	四川	3.5315	3.304	3.7061	3.9399	17575	16444	2784.14	0.25019	2.06872	207.16	5661.86	41564.2	45	0.581815	11501.8	0.0392159	0.030727	0.0712418	0.0143319	0.0228296	0.00930875	0.060374	0.0591401	0.0165325	0.0612724	0.066526	0.482177	四川	0.102313	1.12789	0.557664	1.43125	1.36629
四川	2022	2.51883	1.67281	四川	2022	56610.2	5965.5	20591.4	30053.3	0.114088	8.373	2.82693	12.9126	8.28956	四川	3.7157	3.503	3.9727	3.9261	18672	17199	2975.74	0.33853	2.07733	204.37	5965.5	44058.1	44.1	0.599676	12028.6	0.0392159	0.030727	0.0712418	0.0143319	0.0228296	0.00930875	0.060374	0.0591401	0.0165325	0.0612724	0.066526	0.520107	四川	-0.0297296	1.27689	0.7194	1.45043	1.32228
天津	2011	1.81768	1.90557	天津	2011	8112.5	141.1	3756.3	4215.2	0.0510931	8.3461	1.19019	9.62661	5.12396	天津	0.6058	0.6937	0.5333	0.4472	11941	8273	338	0.39506	0.757789	24.39	141.1	7067.67	16.4	0.318906	51.58	0.0392159	0.030727	0.0712418	0.0143319	0.0228296	0.00930875	0.060374	0.0591401	0.0165325	0.0612724	0.066526	0.0688915	天津	-1.87623	1.05421	-0.840154	-2.45328	-1.32802
天津	2012	1.66196	1.9313	天津	2012	9043	147.9	4134	4761.1	0.0471162	8.4059	1.28913	9.64154	5.035	天津	1.2296	1.1061	1.3577	1.4044	13593	10254	337.04	0.62275	0.790277	24.45	147.9	7934.78	17.1	0.329413	54.24	0.0392159	0.030727	0.0712418	0.0143319	0.0228296	0.00930875	0.060374	0.0591401	0.0165325	0.0612724	0.066526	0.0733736	天津	-1.99279	1.54924	-0.745877	-2.43555	-1.4025
天津	2013	1.69461	1.93725	天津	2013	9945.4	154.8	4407.1	5383.6	0.048262	8.024	1.40448	9.66256	5.1665	天津	1.7526	1.4654	1.9752	2.2967	15353	12491	308.87	0.19231	0.796384	24.34	154.79	9130.2	17.5	0.359134	88.5	0.0392159	0.030727	0.0712418	0.0143319	0.0228296	0.00930875	0.060374	0.0591401	0.0165325	0.0612724	0.066526	0.0906308	天津	-1.95921	-1.61215	-0.63597	-2.41058	-1.29241
天津	2014	1.58482	1.94976	天津	2014	10640.6	158.8	4615.5	5866.3	0.0467674	8.063	1.47691	9.6872	5.24175	天津	2.0016	1.9386	1.8028	2.5711	17014	13739	308.87	0.91262	0.802075	23.27	158.82	10518.2	18.5	0.368163	94.9	0.0392159	0.030727	0.0712418	0.0143319	0.0228296	0.00930875	0.060374	0.0591401	0.0165325	0.0612724	0.066526	0.08906	天津	-2.00302	-1.28931	-0.566958	-2.38131	-1.22941
天津	2015	1.55102	1.97542	天津	2015	10879.5	162.3	4489.6	6227.6	0.0482868	8.165	1.53837	9.71414	5.41165	天津	2.3753	2.1189	1.9546	3.9862	18482	14739	308.87	0.89535	0.792218	21.78	162.31	11832	19.6	0.386124	97.3	0.0392159	0.030727	0.0712418	0.0143319	0.0228296	0.00930875	0.060374	0.0591401	0.0165325	0.0612724	0.066526	0.0981136	天津	-1.95848	-0.444946	-0.50839	-2.3493	-1.08717
天津	2016	1.56761	1.99724	天津	2016	11477.2	168.5	4368	6940.8	0.0435256	8.204	1.64137	9.72699	5.36504	天津	2.4584	2.2541	2.3161	3.3915	20076	15912	306.62	0.89167	0.943957	21.78	168.46	12779.4	20.5	0.393545	98.84	0.0392159	0.030727	0.0712418	0.0143319	0.0228296	0.00930875	0.060374	0.0591401	0.0165325	0.0612724	0.066526	0.10595	天津	-2.09804	-0.122101	-0.410251	-2.33404	-1.12619
天津	2017	1.50861	2.01306	天津	2017	12450.6	169	4564.1	7717.5	0.0482431	8.234	1.64685	9.71306	5.39771	天津	2.8403	2.579	3.1013	3.2291	21754	16386	306.62	0	0.945916	18.01	168.96	11288.9	20.6	0.395886	99.25	0.0392159	0.030727	0.0712418	0.0143319	0.0228296	0.00930875	0.060374	0.0591401	0.0165325	0.0612724	0.066526	0.119014	天津	-1.95976	0.126241	-0.405026	-2.35059	-1.09883
天津	2018	2.63866	2.04867	天津	2018	13362.9	175.3	4835.3	8352.3	0.0534004	8.115	1.75901	9.69626	5.33754	天津	3.1688	2.9535	3.1794	3.861	23065	16863	304.66	0.5	1.23361	16.95	175.3	10656.7	20	0.421646	100.01	0.0392159	0.030727	0.0712418	0.0143319	0.0228296	0.00930875	0.060374	0.0591401	0.0165325	0.0612724	0.066526	0.118277	天津	-1.80859	-0.858849	-0.298159	-2.37054	-1.14921
天津	2019	2.52283	2.05486	天津	2019	14055.5	185.4	4947.2	8922.9	0.0454227	8.169	1.90945	9.68855	5.06639	天津	3.4411	3.2386	3.4901	4.0211	24804	17843	304.8	0.57595	1.14015	16.24	185.4	12052.8	19.9	0.467497	100.62	0.0392159	0.030727	0.0712418	0.0143319	0.0228296	0.00930875	0.060374	0.0591401	0.0165325	0.0612724	0.066526	0.125417	天津	-2.04243	-0.411834	-0.154815	-2.3797	-1.37623
天津	2020	3.15	2.06789	天津	2020	14008	210.3	4911.8	8885.9	0.0491282	8.171	2.24566	9.70571	4.88658	天津	3.6146	3.4029	3.7391	4.0874	25691	16844	299.12	0.63953	1.14816	15.29	210.3	12414.4	20.9	0.520791	101.84	0.0392159	0.030727	0.0712418	0.0143319	0.0228296	0.00930875	0.060374	0.0591401	0.0165325	0.0612724	0.066526	0.132841	天津	-1.93382	-0.395278	0.165548	-2.35932	-1.52676
天津	2021	3.74522	2.10083	天津	2021	15685.1	265.9	5672.7	9746.5	0.0469493	8.355	2.44837	9.63607	4.91632	天津	3.7923	3.5768	3.9969	4.1608	27955	19285	285.43	0.26563	1.17322	15.66	265.9	13010.2	21	0.63135	103.96	0.0392159	0.030727	0.0712418	0.0143319	0.0228296	0.00930875	0.060374	0.0591401	0.0165325	0.0612724	0.066526	0.153355	天津	-1.99769	1.12789	0.358691	-2.44205	-1.50186
天津	2022	3.78704	2.09506	天津	2022	16132.2	273.2	5982.3	9876.7	0.0404055	8.373	2.56867	9.63102	4.87748	天津	3.9791	3.7599	4.2616	4.2415	29018	18934	293.98	0	1.19619	15.52	273.2	11722.2	20.5	0.638993	104.5	0.0392159	0.030727	0.0712418	0.0143319	0.0228296	0.00930875	0.060374	0.0591401	0.0165325	0.0612724	0.066526	0.150011	天津	-2.1895	1.27689	0.473323	-2.44805	-1.53438
宁夏	2011	2.08091	1.51089	宁夏	2011	1931.8	175	919.8	837	0.15893	8.3461	1.10208	10.1067	3.71601	宁夏	0.3131	0.3227	0.2316	0.4296	5931	4909	477.59	0.35427	1.56851	38.24	175	1644.74	35.1	0.152518	1910.04	0.0392159	0.030727	0.0712418	0.0143319	0.0228296	0.00930875	0.060374	0.0591401	0.0165325	0.0612724	0.066526	0.0560012	宁夏	1.28466	1.05421	-0.924108	-1.88298	-2.50679
宁夏	2012	2.52481	1.56353	宁夏	2012	2131	189	992.5	949.5	0.161738	8.4059	1.20026	10.1857	3.83945	宁夏	0.8713	0.7678	0.9034	1.1546	6776	5558	491.35	0.39723	1.49433	39.44	189.03	2096.86	35	0.169322	1851.24	0.0392159	0.030727	0.0712418	0.0143319	0.0228296	0.00930875	0.060374	0.0591401	0.0165325	0.0612724	0.066526	0.0587735	宁夏	1.36698	1.54924	-0.830559	-1.78906	-2.40344
宁夏	2013	2.16024	1.54844	宁夏	2013	2327.7	210.7	1059.5	1057.5	0.161933	8.024	1.37507	10.2596	3.91202	宁夏	1.3674	1.1508	1.2902	2.2232	7599	6740	498.56	0.53236	1.43031	40.44	210.72	2651.1	35.4	0.193709	1709.44	0.0392159	0.030727	0.0712418	0.0143319	0.0228296	0.00930875	0.060374	0.0591401	0.0165325	0.0612724	0.066526	0.0604784	宁夏	1.37269	-1.61215	-0.663991	-1.70136	-2.34268
宁夏	2014	2.19486	1.59468	宁夏	2014	2473.9	216.9	1113.7	1143.4	0.156979	8.063	1.46287	10.3506	4.17439	宁夏	1.6526	1.6718	1.1428	2.5155	8410	7676	498.91	0.35661	1.38589	39.67	216.92	3173.79	37.1	0.20377	1959.81	0.0392159	0.030727	0.0712418	0.0143319	0.0228296	0.00930875	0.060374	0.0591401	0.0165325	0.0612724	0.066526	0.0678837	宁夏	1.22749	-1.28931	-0.580332	-1.59319	-2.12302
宁夏	2015	2.12217	1.61118	宁夏	2015	2579.4	236.8	1116.8	1225.8	0.146044	8.165	1.64743	10.4115	4.13996	宁夏	2.147	1.9035	1.3487	4.4018	9119	8415	506.53	0.76325	1.36231	40.09	236.82	3505.45	38.1	0.221382	2057.2	0.0392159	0.030727	0.0712418	0.0143319	0.0228296	0.00930875	0.060374	0.0591401	0.0165325	0.0612724	0.066526	0.0656966	宁夏	0.906967	-0.444946	-0.404475	-1.52084	-2.15185
宁夏	2016	1.94987	1.63712	宁夏	2016	2781.4	241	1179.7	1360.7	0.160449	8.204	1.73158	10.4323	4.237	宁夏	2.1236	2.0592	1.7962	2.9312	9852	9138	515.15	0.61347	1.92726	40.72	241	3794.25	40.8	0.228538	2136.54	0.0392159	0.030727	0.0712418	0.0143319	0.0228296	0.00930875	0.060374	0.0591401	0.0165325	0.0612724	0.066526	0.0769947	宁夏	1.3292	-0.122101	-0.324297	-1.49608	-2.0706
宁夏	2017	1.92662	1.65234	宁夏	2017	3200.3	250.6	1406	1543.7	0.162	8.234	1.87927	10.4505	4.33336	宁夏	2.5559	2.4242	2.5221	3.0524	10738	9982	511.45	0.64794	1.87094	40.8	250.62	3728.38	40.3	0.235117	2214.84	0.0392159	0.030727	0.0712418	0.0143319	0.0228296	0.00930875	0.060374	0.0591401	0.0165325	0.0612724	0.066526	0.0806067	宁夏	1.37465	0.126241	-0.183567	-1.47453	-1.98993
宁夏	2018	2.11645	1.52115	宁夏	2018	3510.2	279.4	1488.1	1742.7	0.15437	8.115	2.14392	10.4746	4.4006	宁夏	2.7292	2.7425	2.2527	3.5514	11708	10790	523.45	0.56516	1.87266	38.37	279.39	3049.81	39.5	0.254257	2301.07	0.0392159	0.030727	0.0712418	0.0143319	0.0228296	0.00930875	0.060374	0.0591401	0.0165325	0.0612724	0.066526	0.0866641	宁夏	1.151	-0.858849	0.0685977	-1.44587	-1.93363
宁夏	2019	2.04276	1.51996	宁夏	2019	3748.5	280	1587.1	1881.4	0.15168	8.169	2.24295	10.5071	5.2486	宁夏	2.9231	2.9904	2.4155	3.6235	12858	11465	538.29	0.25086	1.82387	38.44	279.96	2735.68	39.4	0.258205	2388.1	0.0392159	0.030727	0.0712418	0.0143319	0.0228296	0.00930875	0.060374	0.0591401	0.0165325	0.0612724	0.066526	0.0949616	宁夏	1.07216	-0.411834	0.162965	-1.40723	-1.22367
宁夏	2020	1.88388	1.48079	宁夏	2020	3956.3	338.1	1629.3	1989	0.171208	8.171	2.78554	10.516	5.1801	宁夏	3.1002	3.2045	2.6272	3.6152	13889	11724	552.53	0.17902	1.82308	38.06	338.1	2845.11	40.5	0.303433	2471.53	0.0392159	0.030727	0.0712418	0.0143319	0.0228296	0.00930875	0.060374	0.0591401	0.0165325	0.0612724	0.066526	0.104129	宁夏	1.64457	-0.395278	0.679965	-1.39672	-1.28103
宁夏	2021	1.95137	1.529	宁夏	2021	4588.2	364.6	2099.2	2124.4	0.16974	8.355	3.08615	10.5341	5.03435	宁夏	3.2823	3.4275	2.8445	3.6137	15337	13536	563.78	0.28659	1.79852	37.46	364.62	2907.7	38.6	0.3263	2567.89	0.0392159	0.030727	0.0712418	0.0143319	0.0228296	0.00930875	0.060374	0.0591401	0.0165325	0.0612724	0.066526	0.108838	宁夏	1.60153	1.12789	0.9664	-1.37515	-1.40305
宁夏	2022	2.23766	1.53726	宁夏	2022	5104.6	407.5	2439.1	2258	0.154221	8.373	3.45273	10.5544	5.16821	宁夏	3.4739	3.6589	3.0715	3.6123	16430	12825	560.57	0.3688	1.79294	36.88	407.5	3204.29	39.4	0.360238	2666.45	0.0392159	0.030727	0.0712418	0.0143319	0.0228296	0.00930875	0.060374	0.0591401	0.0165325	0.0612724	0.066526	0.110278	宁夏	1.14664	1.27689	1.3157	-1.35105	-1.29098
安徽	2011	1.95154	1.63407	安徽	2011	16284.9	1868	8189.1	6227.8	0.106531	8.3461	0.999876	11.9153	6.73281	安徽	0.3307	0.202	0.5558	0.3466	6811	6235	3547.65	0.1507	1.6603	329.67	1867.99	12455.7	41.7	0.205612	2180.33	0.0392159	0.030727	0.0712418	0.0143319	0.0228296	0.00930875	0.060374	0.0591401	0.0165325	0.0612724	0.066526	0.17127	安徽	-0.251247	1.05421	-1.0215	0.265627	0.0189342
安徽	2012	1.83584	1.67624	安徽	2012	18341.7	2018.6	9247.9	7075.2	0.108677	8.4059	1.10663	12.0147	6.92245	安徽	0.9663	0.6606	1.3806	1.2231	7826	6988	3585.09	0.48226	1.58168	333.53	2018.57	15425.8	42.5	0.223686	2245.01	0.0392159	0.030727	0.0712418	0.0143319	0.0228296	0.00930875	0.060374	0.0591401	0.0165325	0.0612724	0.066526	0.180242	安徽	-0.188341	1.54924	-0.919778	0.383672	0.177705
安徽	2013	1.82691	1.69446	安徽	2013	20584	2173.2	10233.4	8177.4	0.109932	8.024	1.22317	12.0654	7.08849	安徽	1.5083	1.0651	1.9086	2.2445	8850	7200	4305.53	0.28801	1.52516	338.4	2173.16	18621.9	42.9	0.240291	1654.51	0.0392159	0.030727	0.0712418	0.0143319	0.0228296	0.00930875	0.060374	0.0591401	0.0165325	0.0612724	0.066526	0.199649	安徽	-0.151551	-1.61215	-0.808732	0.444017	0.316721
安徽	2014	1.82614	1.71686	安徽	2014	22519.7	2295	10982.6	9242.1	0.107779	8.063	1.32375	12.069	7.31315	安徽	1.8059	1.5656	1.7384	2.7222	9916	7981	4331.69	0.38983	1.49237	341.39	2294.95	21875.6	45.4	0.250553	1702.02	0.0392159	0.030727	0.0712418	0.0143319	0.0228296	0.00930875	0.060374	0.0591401	0.0165325	0.0612724	0.066526	0.208991	安徽	-0.214671	-1.28931	-0.712893	0.44818	0.504812
安徽	2015	1.87268	1.73455	安徽	2015	23831.2	2376.1	10838.3	10616.8	0.110277	8.165	1.41946	12.1385	7.44996	安徽	2.1128	1.7165	1.8978	3.8123	10821	8975	4400.34	0.57536	1.45849	338.69	2376.05	24386	44.4	0.257056	1857.42	0.0392159	0.030727	0.0712418	0.0143319	0.0228296	0.00930875	0.060374	0.0591401	0.0165325	0.0612724	0.066526	0.227903	安徽	-0.14145	-0.444946	-0.621699	0.530853	0.619352
安徽	2016	1.94399	1.75112	安徽	2016	26307.7	2489.8	11517.5	12300.5	0.113133	8.204	1.55085	12.1939	7.56812	安徽	2.2878	1.9489	2.2995	3.3854	11720	10287	4437.46	0.41575	1.27996	327.01	2489.76	27033.4	44.8	0.29622	1901.79	0.0392159	0.030727	0.0712418	0.0143319	0.0228296	0.00930875	0.060374	0.0591401	0.0165325	0.0612724	0.066526	0.24559	安徽	-0.0577118	-0.122101	-0.496505	0.596663	0.718276
安徽	2017	1.95476	1.76814	安徽	2017	29676.2	2582.3	12681.2	14412.7	0.109918	8.234	1.66051	12.2224	7.68855	安徽	2.716	2.347	3.0955	3.2448	12758	11106	4504.14	0.50425	1.38237	318.72	2582.27	29275.1	44.8	0.310233	1940.33	0.0392159	0.030727	0.0712418	0.0143319	0.0228296	0.00930875	0.060374	0.0591401	0.0165325	0.0612724	0.066526	0.265407	安徽	-0.151962	0.126241	-0.392017	0.630431	0.819099
安徽	2018	2.5475	1.71009	安徽	2018	34010.9	2638	14094.4	17278.5	0.10725	8.115	1.73384	12.2493	7.76989	安徽	3.0383	2.7341	3.0962	3.9379	13996	12748	4538.29	0.54263	1.34037	311.8	2638	32729.5	44.9	0.316494	1989.18	0.0392159	0.030727	0.0712418	0.0143319	0.0228296	0.00930875	0.060374	0.0591401	0.0165325	0.0612724	0.066526	0.29402	安徽	-0.230178	-0.858849	-0.322137	0.66238	0.887197
安徽	2019	2.85847	1.6936	安徽	2019	36845.5	2916	14970	18959.5	0.0996007	8.169	1.97178	12.2936	8.07512	安徽	3.3029	3.0115	3.4153	4.0611	15416	14546	4580.84	0.54906	1.3205	298.02	2915.97	35740.6	49.7	0.349489	2084.46	0.0392159	0.030727	0.0712418	0.0143319	0.0228296	0.00930875	0.060374	0.0591401	0.0165325	0.0612724	0.066526	0.316964	安徽	-0.45438	-0.411834	-0.0954173	0.715062	1.14274
安徽	2020	3.00478	1.68535	安徽	2020	38061.5	3185	15216.5	19660.1	0.123674	8.171	2.23306	12.3736	8.08079	安徽	3.5016	3.2375	3.6615	4.0838	16620	15024	4608.83	0.63002	1.29686	289.9	3184.68	37563.4	46.8	0.380325	2157	0.0392159	0.030727	0.0712418	0.0143319	0.0228296	0.00930875	0.060374	0.0591401	0.0165325	0.0612724	0.066526	0.349644	安徽	0.251258	-0.395278	0.15354	0.810136	1.1475
安徽	2021	3.27933	1.68835	安徽	2021	42565.2	3363.9	17240.1	21961.1	0.124166	8.355	2.41914	12.3775	8.22932	安徽	3.7037	3.4656	3.9114	4.1098	18372	17163	4509.87	0.21142	1.28342	284.73	3363.9	41094.4	47.5	0.399324	2219	0.0392159	0.030727	0.0712418	0.0143319	0.0228296	0.00930875	0.060374	0.0591401	0.0165325	0.0612724	0.066526	0.38347	安徽	0.265673	1.12789	0.330845	0.814788	1.27185
安徽	2022	3.58215	1.68258	安徽	2022	44607.7	3516.5	17946.8	23144.4	0.118366	8.373	2.57189	12.3799	8.13856	安徽	3.9134	3.6968	4.1664	4.1366	19575	17980	4576.18	0.18263	1.26357	280.19	3516.5	44792.9	45.9	0.416663	2284.94	0.0392159	0.030727	0.0712418	0.0143319	0.0228296	0.00930875	0.060374	0.0591401	0.0165325	0.0612724	0.066526	0.398599	安徽	0.0956622	1.27689	0.476389	0.817566	1.19586
山东	2011	1.71293	1.80522	山东	2011	39064.9	3768.6	19926.1	15370.3	0.112753	8.3461	1.53951	12.3596	8.10186	山东	0.3855	0.3367	0.4716	0.3901	8395	5489	4986.88	0.1963	0.891274	473.64	3768.55	26749.7	39.2	0.362548	4722.49	0.0392159	0.030727	0.0712418	0.0143319	0.0228296	0.00930875	0.060374	0.0591401	0.0165325	0.0612724	0.066526	0.291001	山东	-0.0688521	1.05421	-0.507312	0.793476	1.16513
山东	2012	1.68024	1.82069	山东	2012	42957.3	4047.1	21275.9	17634.4	0.114119	8.4059	1.67873	12.4073	8.23541	山东	1.0035	0.8015	1.2753	1.1768	9506	6304	5058.11	0.31362	0.874588	476.26	4047.06	31256	39.2	0.386494	4781.26	0.0392159	0.030727	0.0712418	0.0143319	0.0228296	0.00930875	0.060374	0.0591401	0.0165325	0.0612724	0.066526	0.315095	山东	-0.0288113	1.54924	-0.374653	0.850159	1.27695
山东	2013	1.68564	1.82409	山东	2013	47344.3	4454.1	22615.9	20274.3	0.11185	8.024	1.89089	12.4403	8.38279	山东	1.593	1.2201	1.8907	2.2832	10687	6877	4729.03	0.36307	0.874158	472.66	4454.11	36789.1	39.5	0.415817	3477.46	0.0392159	0.030727	0.0712418	0.0143319	0.0228296	0.00930875	0.060374	0.0591401	0.0165325	0.0612724	0.066526	0.329351	山东	-0.09534	-1.61215	-0.1725	0.889335	1.40034
山东	2014	1.69231	1.82714	山东	2014	50774.8	4662.8	23588	22524	0.107678	8.063	2.02619	12.4666	8.51951	山东	1.8188	1.6989	1.6119	2.5908	11882	7962	4901.95	0.38054	0.863774	468.08	4662.81	42495.6	40	0.429217	3612.46	0.0392159	0.030727	0.0712418	0.0143319	0.0228296	0.00930875	0.060374	0.0591401	0.0165325	0.0612724	0.066526	0.344043	山东	-0.217612	-1.28931	-0.0435764	0.920545	1.5148
山东	2015	1.70542	1.83467	山东	2015	55288.8	4902.8	24814.9	25571.1	0.116899	8.165	2.18702	12.4816	8.6273	山东	2.2066	1.9211	1.7815	3.9216	12930	8748	4964.43	0.48129	0.852317	463.5	4902.82	48312.4	39.8	0.449064	3776.71	0.0392159	0.030727	0.0712418	0.0143319	0.0228296	0.00930875	0.060374	0.0591401	0.0165325	0.0612724	0.066526	0.381048	山东	0.0526726	-0.444946	0.109674	0.938408	1.60504
山东	2016	1.71095	1.84611	山东	2016	58762.5	4830.3	25565	28367.2	0.107758	8.204	2.22652	12.4902	8.73197	山东	2.3257	2.098	2.1781	3.3458	13954	9519	5161.16	0.41344	1.15116	456.46	4830.25	53322.9	38.9	0.449727	3879.4	0.0392159	0.030727	0.0712418	0.0143319	0.0228296	0.00930875	0.060374	0.0591401	0.0165325	0.0612724	0.066526	0.40927	山东	-0.215287	-0.122101	0.14731	0.948614	1.69267
山东	2017	1.827	1.83665	山东	2017	63012.1	4832.7	26925.6	31253.8	0.102997	8.234	2.32343	12.5084	8.82975	山东	2.7206	2.4719	2.9092	3.1992	15118	10342	5191.06	0.36329	1.09501	439.96	4832.71	55202.7	38.5	0.460461	4005.43	0.0392159	0.030727	0.0712418	0.0143319	0.0228296	0.00930875	0.060374	0.0591401	0.0165325	0.0612724	0.066526	0.430038	山东	-0.354819	0.126241	0.239644	0.97019	1.77454
山东	2018	2.49832	1.76356	山东	2018	66648.9	4950.5	27523.7	34174.7	0.098852	8.115	2.41951	12.5269	8.83714	山东	3.0113	2.8199	2.8785	3.8848	16297	11270	5235.99	0.58396	1.06352	420.35	4950.52	57466	38.4	0.476121	4142.96	0.0392159	0.030727	0.0712418	0.0143319	0.0228296	0.00930875	0.060374	0.0591401	0.0165325	0.0612724	0.066526	0.446478	山东	-0.476325	-0.858849	0.3312	0.992166	1.78073
山东	2019	3.0791	1.71778	山东	2019	70540.5	5117	28171.8	37251.7	0.100187	8.169	2.50951	12.5437	8.61234	山东	3.2736	3.0997	3.1854	4.0084	17775	12309	5271.37	0.51115	1.02371	395.34	5117	52753.8	41.6	0.500965	4277.56	0.0392159	0.030727	0.0712418	0.0143319	0.0228296	0.00930875	0.060374	0.0591401	0.0165325	0.0612724	0.066526	0.467339	山东	-0.437205	-0.411834	0.416957	1.01218	1.59252
山东	2020	3.2568	1.73358	山东	2020	72798.2	5364.4	28456.7	38977.2	0.0948314	8.171	2.71339	12.5666	8.55564	山东	3.4781	3.3166	3.4349	4.09	18753	12660	5293.56	0.23234	0.993105	380.88	5364.4	54653	42.7	0.528062	4430.25	0.0392159	0.030727	0.0712418	0.0143319	0.0228296	0.00930875	0.060374	0.0591401	0.0165325	0.0612724	0.066526	0.507856	山东	-0.594177	-0.395278	0.611214	1.03937	1.54505
山东	2021	3.26834	1.74783	山东	2021	82875.2	6029	32834.5	44011.7	0.0876749	8.355	3.1271	12.5712	8.6365	山东	3.6844	3.5408	3.6849	4.1725	20794	14299	5069.92	0.17663	0.97877	371.03	6029.03	57932.1	41.6	0.589071	4583.12	0.0392159	0.030727	0.0712418	0.0143319	0.0228296	0.00930875	0.060374	0.0591401	0.0165325	0.0612724	0.066526	0.542417	山东	-0.803946	1.12789	1.00542	1.04486	1.61275
山东	2022	3.05973	1.75566	山东	2022	87576.9	6296.5	34562.3	46718.1	0.0922495	8.373	3.36655	12.5837	8.57144	山东	3.8983	3.7671	3.9439	4.2555	22110	14687	5209.09	0.29231	0.950882	362.09	6296.5	61466	40.6	0.617376	4722.48	0.0392159	0.030727	0.0712418	0.0143319	0.0228296	0.00930875	0.060374	0.0591401	0.0165325	0.0612724	0.066526	0.557345	山东	-0.669856	1.27689	1.23358	1.05967	1.55827
山西	2011	2.57335	1.40447	山西	2011	10894.4	586.6	6750.2	3557.7	0.102143	8.3461	0.650493	11.8116	6.57214	山西	0.3341	0.2894	0.2161	0.6957	6225	5096	1319.85	0.53675	1.26205	114.57	586.56	7073.06	44.1	0.166793	5560.62	0.0392159	0.030727	0.0712418	0.0143319	0.0228296	0.00930875	0.060374	0.0591401	0.0165325	0.0612724	0.066526	0.112643	山西	-0.379869	1.05421	-1.3544	0.142458	-0.115577
山西	2012	2.3363	1.40095	山西	2012	11683.1	642	6852.7	4188.4	0.112207	8.4059	0.733009	11.8333	6.71453	山西	0.9298	0.752	0.8648	1.635	7064	6184	1319.06	0.50977	1.20946	118.28	641.97	8863.26	45.8	0.182537	5290.62	0.0392159	0.030727	0.0712418	0.0143319	0.0228296	0.00930875	0.060374	0.0591401	0.0165325	0.0612724	0.066526	0.121313	山西	-0.0848733	1.54924	-1.27578	0.168286	0.00363659
山西	2013	2.32145	1.41467	山西	2013	11987.2	697.6	6684.3	4605.3	0.112104	8.024	0.823784	11.8453	6.85298	山西	1.4422	1.154	1.3908	2.4875	7949	6458	1382.79	0.36291	1.15223	121.02	697.57	11031.9	45.6	0.19987	5475.69	0.0392159	0.030727	0.0712418	0.0143319	0.0228296	0.00930875	0.060374	0.0591401	0.0165325	0.0612724	0.066526	0.131449	山西	-0.0878819	-1.61215	-1.18928	0.182541	0.119548
山西	2014	2.30389	1.41375	山西	2014	12094.7	736.6	6378	4980.1	0.106263	8.063	0.893478	11.8525	6.96234	山西	1.6766	1.6316	1.2478	2.6043	8809	6992	1408.17	0.42216	1.11514	119.61	736.62	12354.5	45.6	0.21173	5667.97	0.0392159	0.030727	0.0712418	0.0143319	0.0228296	0.00930875	0.060374	0.0591401	0.0165325	0.0612724	0.066526	0.135717	山西	-0.259106	-1.28931	-1.12288	0.191047	0.211103
山西	2015	2.22682	1.41715	山西	2015	11836.4	726.2	5219.7	5890.5	0.115239	8.165	0.917795	11.8562	7.01786	山西	2.063	1.8614	1.4152	3.9057	9454	7421	1460.28	0.47996	1.07787	118.55	726.21	14074.1	45.5	0.212337	5846.39	0.0392159	0.030727	0.0712418	0.0143319	0.0228296	0.00930875	0.060374	0.0591401	0.0165325	0.0612724	0.066526	0.148178	山西	0.00401065	-0.444946	-1.0997	0.195471	0.25759
山西	2016	2.30474	1.44624	山西	2016	11946.4	724.3	5113.6	6108.5	0.125995	8.204	0.952277	11.864	7.08674	山西	2.2481	2.0551	1.8938	3.5296	10082	8029	1487.29	0.41056	2.05906	117.07	724.28	14198	45.4	0.213502	6171.76	0.0392159	0.030727	0.0712418	0.0143319	0.0228296	0.00930875	0.060374	0.0591401	0.0165325	0.0612724	0.066526	0.161843	山西	0.319292	-0.122101	-1.06685	0.204756	0.315253
山西	2017	2.48028	1.49564	山西	2017	14484.3	719.2	6635.3	7129.8	0.127225	8.234	0.976072	11.8696	7.15031	山西	2.5995	2.4302	2.5498	3.2492	10788	8424	1511.21	0.45124	2.59945	112	719.16	6040.54	45.2	0.213578	6484.79	0.0392159	0.030727	0.0712418	0.0143319	0.0228296	0.00930875	0.060374	0.0591401	0.0165325	0.0612724	0.066526	0.168185	山西	0.355335	0.126241	-1.04418	0.211335	0.368476
山西	2018	2.51116	1.49277	山西	2018	15958.1	740.8	7074.5	8142.9	0.135703	8.115	1.03881	11.8729	7.23121	山西	2.8365	2.7703	2.4973	3.6719	11750	9172	1518.68	0.70655	2.46699	109.61	740.75	6384.85	42.3	0.221762	6798.51	0.0392159	0.030727	0.0712418	0.0143319	0.0228296	0.00930875	0.060374	0.0591401	0.0165325	0.0612724	0.066526	0.171323	山西	0.603848	-0.858849	-0.984396	0.215246	0.436211
山西	2019	2.58386	1.50522	山西	2019	16961.6	825.3	7466.3	8670	0.132896	8.169	1.20176	11.8795	7.10923	山西	3.0873	3.0561	2.7789	3.7507	12902	9728	1519.34	0.39811	2.32241	108.41	825.3	6978.64	43.9	0.24841	7086.54	0.0392159	0.030727	0.0712418	0.0143319	0.0228296	0.00930875	0.060374	0.0591401	0.0165325	0.0612724	0.066526	0.18584	山西	0.521559	-0.411834	-0.829135	0.223152	0.33408
山西	2020	2.46669	1.50444	山西	2020	17835.6	1166.6	7703.2	8965.8	0.1279	8.171	1.48032	11.8798	7.07013	山西	3.2573	3.2729	2.9137	3.8304	13878	10290	1517.38	0.27643	2.22002	107.41	1166.6	7718.38	42.8	0.347874	7395.74	0.0392159	0.030727	0.0712418	0.0143319	0.0228296	0.00930875	0.060374	0.0591401	0.0165325	0.0612724	0.066526	0.204529	山西	0.375123	-0.395278	-0.563709	0.223481	0.301347
山西	2021	2.72267	1.56036	山西	2021	22870.4	1286.9	11578.1	10005.4	0.101896	8.355	1.67637	11.8818	7.22293	山西	3.4291	3.4957	3.0498	3.9123	15308	11410	1498.06	0.3458	2.16893	105.64	1286.87	8389.88	42.7	0.378183	7731.93	0.0392159	0.030727	0.0712418	0.0143319	0.0228296	0.00930875	0.060374	0.0591401	0.0165325	0.0612724	0.066526	0.211757	山西	-0.387102	1.12789	-0.3769	0.225898	0.429276
山西	2022	2.774	1.54706	山西	2022	25583.9	1335.3	13848.5	10400	0.0981656	8.373	1.76243	11.8877	7.18546	山西	3.6025	3.7258	3.1862	3.9996	16323	12091	1502.01	0.22569	2.10678	103.47	1335.3	8884.88	43	0.391905	8070.26	0.0392159	0.030727	0.0712418	0.0143319	0.0228296	0.00930875	0.060374	0.0591401	0.0165325	0.0612724	0.066526	0.220943	山西	-0.496445	1.27689	-0.294895	0.232877	0.397907
广东	2011	2.8383	1.86717	广东	2011	53072.8	2553.2	26161.1	24358.5	0.0626214	8.3461	1.19638	12.1586	7.97171	广东	0.6948	0.6341	0.8097	0.6866	8889	7205	1873.16	0.2358	1.75778	241.3	2553.17	17069.2	24.1	0.615964	1418.72	0.0392159	0.030727	0.0712418	0.0143319	0.0228296	0.00930875	0.060374	0.0591401	0.0165325	0.0612724	0.066526	0.302661	广东	-1.53831	1.05421	-0.834257	0.55466	1.05617
广东	2012	3.16002	1.8792	广东	2012	57007.7	2711.3	27346.1	26950.3	0.0730333	8.4059	1.25457	12.1805	7.97563	广东	1.2706	1.1137	1.4938	1.3831	9999	7990	1874.44	0.47028	1.70163	245.38	2711.32	18751.5	23.6	0.654006	1428.62	0.0392159	0.030727	0.0712418	0.0143319	0.0228296	0.00930875	0.060374	0.0591401	0.0165325	0.0612724	0.066526	0.323583	广东	-1.23312	1.54924	-0.77881	0.580652	1.05945
广东	2013	3.06932	1.90551	广东	2013	62503.4	2876.4	29343	30284	0.070774	8.024	1.33528	12.2205	8.06196	广东	1.8478	1.5333	2.0844	2.4561	11068	8938	1770.76	0.39753	1.62899	243.91	2876.42	22308.4	23.4	0.706051	1349.46	0.0392159	0.030727	0.0712418	0.0143319	0.0228296	0.00930875	0.060374	0.0591401	0.0165325	0.0612724	0.066526	0.353382	广东	-1.29934	-1.61215	-0.701908	0.628267	1.13173
广东	2014	3.11972	1.92891	广东	2014	68173	3038.7	31930.4	33204	0.0609212	8.063	1.40177	12.2648	8.16939	广东	2.0153	1.9963	1.7504	2.5598	12246	10043	1770.99	0.4778	1.60509	249.58	3038.71	26293.9	23.3	0.73805	1384.91	0.0392159	0.030727	0.0712418	0.0143319	0.0228296	0.00930875	0.060374	0.0591401	0.0165325	0.0612724	0.066526	0.3675	广东	-1.58814	-1.28931	-0.638555	0.680827	1.22167
广东	2015	3.33438	1.95385	广东	2015	74732.4	3189.8	33913.8	37628.9	0.0632922	8.165	1.48952	12.2831	8.27055	广东	2.4095	2.2552	1.9587	3.7379	13360	11103	1771.26	0.58443	1.55539	256.46	3189.76	30343	23.3	0.780799	1457.52	0.0392159	0.030727	0.0712418	0.0143319	0.0228296	0.00930875	0.060374	0.0591401	0.0165325	0.0612724	0.066526	0.404189	广东	-1.51865	-0.444946	-0.554936	0.702632	1.30636
广东	2016	3.7746	1.98604	广东	2016	82163.2	3500.5	35499.2	43163.5	0.053208	8.204	1.63665	12.2926	8.3712	广东	2.48	2.4007	2.365	2.9507	14512	12415	1771.71	0.29745	1.74924	261.02	3500.49	33303.6	23.4	0.859392	1536.17	0.0392159	0.030727	0.0712418	0.0143319	0.0228296	0.00930875	0.060374	0.0591401	0.0165325	0.0612724	0.066526	0.435257	广东	-1.81423	-0.122101	-0.414745	0.713918	1.39063
广东	2017	4.32007	2.02283	广东	2017	91648.7	3611.4	38536.6	49500.7	0.050168	8.234	1.68049	12.2995	8.47142	广东	2.9617	2.7591	3.2817	3.0492	15780	13200	1774.61	0.46815	1.75359	258.3	3611.44	37761.8	22.6	0.878224	1638.7	0.0392159	0.030727	0.0712418	0.0143319	0.0228296	0.00930875	0.060374	0.0591401	0.0165325	0.0612724	0.066526	0.469093	广东	-1.90334	0.126241	-0.372976	0.722035	1.47454
广东	2018	5.14521	2.05505	广东	2018	99945.2	3836.4	41398.5	54710.4	0.05784	8.115	1.81508	12.2909	8.51459	广东	3.3192	3.1244	3.2993	3.9986	17168	15411	1775.21	0.30887	1.7611	231.32	3836.4	41802.3	23.1	0.922778	1757.89	0.0392159	0.030727	0.0712418	0.0143319	0.0228296	0.00930875	0.060374	0.0591401	0.0165325	0.0612724	0.066526	0.521519	广东	-1.67846	-0.858849	-0.24473	0.711814	1.51068
广东	2019	6.45875	2.08837	广东	2019	107987	4350.6	43368.2	60268.1	0.0553641	8.169	2.10083	12.3027	8.50173	广东	3.6061	3.3998	3.645	4.2166	18818	16949	1773.4	0.30546	1.77433	225.79	4350.6	46442.3	25.1	1.02775	1858.08	0.0392159	0.030727	0.0712418	0.0143319	0.0228296	0.00930875	0.060374	0.0591401	0.0165325	0.0612724	0.066526	0.581938	广东	-1.75103	-0.411834	0.027544	0.725869	1.49992
广东	2020	8.11802	2.11391	广东	2020	111152	4732.7	43868.1	62550.8	0.0645874	8.171	2.42145	12.3099	8.36718	广东	3.7953	3.5694	4.0435	4.0906	20143	17132	1776.46	0.3151	1.78399	219.8	4732.7	49786.2	25.8	1.09636	1953.71	0.0392159	0.030727	0.0712418	0.0143319	0.0228296	0.00930875	0.060374	0.0591401	0.0165325	0.0612724	0.066526	0.586927	广东	-1.48068	-0.395278	0.333045	0.734375	1.38727
广东	2021	8.37969	2.12622	广东	2021	124720	4984.7	50555.8	69179	0.0608028	8.355	2.58111	12.3149	8.56865	广东	3.9884	3.7413	4.4468	3.9664	22306	20012	1529.21	0.42016	1.7819	212.87	4984.7	52922.7	26.4	1.14515	2034.54	0.0392159	0.030727	0.0712418	0.0143319	0.0228296	0.00930875	0.060374	0.0591401	0.0165325	0.0612724	0.066526	0.632217	广东	-1.59161	1.12789	0.485179	0.740326	1.55594
广东	2022	7.40438	2.11212	广东	2022	129514	5350.1	52620.7	71542.7	0.0576035	8.373	2.78633	12.3153	8.62984	广东	4.1834	3.9168	4.8544	3.8429	23598	20800	1560.23	0.2608	1.78127	208.74	5350.09	51546.7	27	1.21481	2091.13	0.0392159	0.030727	0.0712418	0.0143319	0.0228296	0.00930875	0.060374	0.0591401	0.0165325	0.0612724	0.066526	0.636376	广东	-1.68539	1.27689	0.680718	0.740826	1.60717
广西	2011	2.34982	1.51982	广西	2011	10299.9	2006.4	4241.2	4052.3	0.123703	8.3461	1.2286	11.5607	6.17524	广西	0.3389	0.1998	0.4406	0.6133	6003	4882	1529.24	0.44377	1.94513	242.71	2006.43	7990.66	41.5	0.34699	1952.08	0.0392159	0.030727	0.0712418	0.0143319	0.0228296	0.00930875	0.060374	0.0591401	0.0165325	0.0612724	0.066526	0.122409	广西	0.252117	1.05421	-0.803554	-0.155666	-0.447869
广西	2012	2.19819	1.54219	广西	2012	11303.6	2126.4	4503.1	4674.1	0.123632	8.4059	1.31576	11.589	6.26758	广西	0.8935	0.6647	1.0458	1.3725	6894	5720	1541.29	0.52957	1.88871	249.04	2126.41	9808.61	41.3	0.359898	2019.54	0.0392159	0.030727	0.0712418	0.0143319	0.0228296	0.00930875	0.060374	0.0591401	0.0165325	0.0612724	0.066526	0.130706	广西	0.250022	1.54924	-0.720503	-0.121977	-0.370563
广西	2013	2.1366	1.56084	广西	2013	12448.4	2290.6	4709.3	5448.4	0.115905	8.024	1.44597	11.6207	6.40042	广西	1.4146	1.0697	1.5384	2.3282	7793	6035	1586.37	0.25734	1.79619	255.7	2290.64	11907.7	41.1	0.385685	1735.65	0.0392159	0.030727	0.0712418	0.0143319	0.0228296	0.00930875	0.060374	0.0591401	0.0165325	0.0612724	0.066526	0.142136	广西	0.0235212	-1.61215	-0.596434	-0.0842905	-0.259343
广西	2014	2.09942	1.57695	广西	2014	13587.8	2413.4	5145.6	6028.8	0.112446	8.063	1.54813	11.6518	6.51501	广西	1.6612	1.5429	1.3998	2.5266	8683	6675	1600	0.35714	1.64122	258.68	2413.44	13843.2	41.8	0.422526	1931.76	0.0392159	0.030727	0.0712418	0.0143319	0.0228296	0.00930875	0.060374	0.0591401	0.0165325	0.0612724	0.066526	0.149769	广西	-0.0778473	-1.28931	-0.499094	-0.0473703	-0.16341
广西	2015	2.00097	1.59233	广西	2015	14797.8	2565.5	5391	6841.4	0.122378	8.165	1.67751	11.6784	6.61714	广西	2.0723	1.7633	1.5346	4.0694	9467	7582	1618.79	0.46253	1.59835	259.86	2565.45	16227.8	42.3	0.433144	2107.34	0.0392159	0.030727	0.0712418	0.0143319	0.0228296	0.00930875	0.060374	0.0591401	0.0165325	0.0612724	0.066526	0.164348	广西	0.213272	-0.444946	-0.375818	-0.0158127	-0.0779078
广西	2016	2.13236	1.59909	广西	2016	16116.6	2800.3	5621	7695.3	0.129113	8.204	1.84998	11.6998	6.72599	广西	2.2332	1.9351	2.0221	3.6015	10359	8351	1646.07	0.30664	1.69161	262.14	2800.29	18236.8	42.6	0.482173	2284.89	0.0392159	0.030727	0.0712418	0.0143319	0.0228296	0.00930875	0.060374	0.0591401	0.0165325	0.0612724	0.066526	0.184039	广西	0.410672	-0.122101	-0.211478	0.00962686	0.0132303
广西	2017	2.07554	1.63049	广西	2017	17790.7	2878.3	6138.3	8774.1	0.131784	8.234	1.93761	11.722	6.8446	广西	2.6194	2.3273	2.7952	3.2644	11325	9437	1669.87	0.31531	1.63186	263.83	2878.3	20499.1	42.9	0.49661	2463.76	0.0392159	0.030727	0.0712418	0.0143319	0.0228296	0.00930875	0.060374	0.0591401	0.0165325	0.0612724	0.066526	0.202851	广西	0.488982	0.126241	-0.127977	0.0360572	0.112532
广西	2018	2.80006	1.55527	广西	2018	19627.8	3021.1	6692.9	9913.9	0.123632	8.115	2.06011	11.7397	6.95731	广西	2.8925	2.7041	2.7249	3.8193	12435	10617	1706.88	0.568	1.59229	255.05	3021.09	22713	44.5	0.521802	2647.73	0.0392159	0.030727	0.0712418	0.0143319	0.0228296	0.00930875	0.060374	0.0591401	0.0165325	0.0612724	0.066526	0.223281	广西	0.250036	-0.858849	-0.011257	0.05698	0.206891
广西	2019	3.05494	1.50314	广西	2019	21237.1	3389.7	7046.4	10801	0.127707	8.169	2.34691	11.7584	6.85678	广西	3.0991	2.9526	2.9248	3.9001	13676	12045	1713.08	0.39871	1.55967	252.04	3389.67	24893.5	44.5	0.583366	2845.51	0.0392159	0.030727	0.0712418	0.0143319	0.0228296	0.00930875	0.060374	0.0591401	0.0165325	0.0612724	0.066526	0.252897	广西	0.369475	-0.411834	0.26202	0.0792131	0.122725
广西	2020	2.95558	1.49286	广西	2020	22120.9	3645.9	7046.8	11428.1	0.146352	8.171	2.57323	11.7878	6.9511	广西	3.2517	3.1198	3.1324	3.9041	14815	12431	1731.03	0.18332	1.56542	247.85	3645.9	25939	39.8	0.615213	3048.05	0.0392159	0.030727	0.0712418	0.0143319	0.0228296	0.00930875	0.060374	0.0591401	0.0165325	0.0612724	0.066526	0.284334	广西	0.915997	-0.395278	0.477667	0.114224	0.201696
广西	2021	2.95249	1.5371	广西	2021	25209.1	4051.3	8513.9	12643.9	0.130508	8.355	2.88307	11.9869	7.06245	广西	3.4066	3.2883	3.3421	3.9157	16363	14165	1434.96	0.33268	1.58954	251.89	4051.3	27910.4	40	0.675676	3237.28	0.0392159	0.030727	0.0712418	0.0143319	0.0228296	0.00930875	0.060374	0.0591401	0.0165325	0.0612724	0.066526	0.2993	广西	0.45157	1.12789	0.772898	0.350706	0.294917
广西	2022	2.84371	1.56585	广西	2022	26186.1	4270.4	8819.3	13096.3	0.125069	8.373	3.10033	12.0575	7.06894	广西	3.5715	3.4596	3.5601	3.9344	17433	14658	1549.35	0.15452	1.63947	249.2	4270.4	27938.3	40.1	0.702267	3424.98	0.0392159	0.030727	0.0712418	0.0143319	0.0228296	0.00930875	0.060374	0.0591401	0.0165325	0.0612724	0.066526	0.314971	广西	0.292135	1.27689	0.979909	0.434599	0.30035
新疆	2011	2.58772	1.28705	新疆	2011	6532	1047.2	3093.4	2391.4	0.130265	8.3461	1.60692	11.9521	4.98429	新疆	0.2034	0.1292	0.236	0.3892	5853	5105	3884.57	0.82739	2.49092	183.68	1047.2	4632.14	24.2	0.242995	458.73	0.0392159	0.030727	0.0712418	0.0143319	0.0228296	0.00930875	0.060374	0.0591401	0.0165325	0.0612724	0.066526	0.111645	新疆	0.444459	1.05421	-0.443076	0.309419	-1.44496
新疆	2012	2.62066	1.28293	新疆	2012	7411.8	1204.1	3325.9	2881.9	0.134331	8.4059	1.8742	12.0192	5.05433	新疆	0.8245	0.6088	0.8514	1.4876	6876	6154	4029.07	0.54983	2.37354	192.7	1204.1	6158.78	23.2	0.267368	541.9	0.0392159	0.030727	0.0712418	0.0143319	0.0228296	0.00930875	0.060374	0.0591401	0.0165325	0.0612724	0.066526	0.126781	新疆	0.563632	1.54924	-0.188395	0.389069	-1.38632
新疆	2013	2.47155	1.29651	新疆	2013	8392.6	1326.6	3479.9	3586.2	0.126314	8.024	2.10473	12.0445	5.18066	新疆	1.434	1.0144	1.4639	2.7648	7847	7103	4769.89	0.69157	2.19057	203.22	1326.56	7732.3	23.3	0.290612	992.85	0.0392159	0.030727	0.0712418	0.0143319	0.0228296	0.00930875	0.060374	0.0591401	0.0165325	0.0612724	0.066526	0.141559	新疆	0.328634	-1.61215	0.0312576	0.41909	-1.28055
新疆	2014	2.39758	1.30673	新疆	2014	9264.5	1406.7	3829.3	4028.5	0.143852	8.063	2.32917	12.0752	5.37389	新疆	1.6367	1.5128	1.3487	2.5691	8724	7365	4831.89	0.5746	2.16684	236.98	1406.71	9447.74	25.1	0.289029	1054.59	0.0392159	0.030727	0.0712418	0.0143319	0.0228296	0.00930875	0.060374	0.0591401	0.0165325	0.0612724	0.066526	0.152594	新疆	0.8427	-1.28931	0.245112	0.455617	-1.11878
新疆	2015	2.24884	1.32436	新疆	2015	9306.9	1409.7	3446.1	4451.2	0.159096	8.165	2.42992	12.091	5.4476	新疆	2.0549	1.7201	1.486	4.194	9425	7698	4944.92	0.61396	2.07907	248.09	1409.66	10813	25.2	0.285926	1128.88	0.0392159	0.030727	0.0712418	0.0143319	0.0228296	0.00930875	0.060374	0.0591401	0.0165325	0.0612724	0.066526	0.164988	新疆	1.28954	-0.444946	0.341115	0.474391	-1.05707
新疆	2016	2.18379	1.34574	新疆	2016	9630.8	1473.2	3446.1	4711.6	0.173266	8.204	2.62994	12.1122	5.5483	新疆	2.0872	1.9032	1.9011	3.0331	10183	8277	4982.03	0.62673	2.32011	250.19	1473.17	10287.5	25.7	0.262444	1256.27	0.0392159	0.030727	0.0712418	0.0143319	0.0228296	0.00930875	0.060374	0.0591401	0.0165325	0.0612724	0.066526	0.173554	新疆	1.7049	-0.122101	0.531702	0.499593	-0.97276
新疆	2017	2.01834	1.35264	新疆	2017	11159.9	1551.8	4096.2	5511.9	0.132081	8.234	2.7887	12.1299	5.64862	新疆	2.4869	2.2882	2.491	3.1356	11045	8713	4952.29	0.78817	2.23089	250.74	1551.84	12089.1	26.3	0.278633	1420.22	0.0392159	0.030727	0.0712418	0.0143319	0.0228296	0.00930875	0.060374	0.0591401	0.0165325	0.0612724	0.066526	0.177276	新疆	0.497669	0.126241	0.682981	0.520628	-0.888766
新疆	2018	2.03481	1.31567	新疆	2018	12809.4	1692.1	4657.2	6460.1	0.150276	8.115	3.13887	12.1498	5.71933	新疆	2.7184	2.6735	2.3294	3.5737	11975	9421	4883.46	0.67279	2.22158	254.99	1692.09	9042.66	26.8	0.295112	1688.11	0.0392159	0.030727	0.0712418	0.0143319	0.0228296	0.00930875	0.060374	0.0591401	0.0165325	0.0612724	0.066526	0.189182	新疆	1.031	-0.858849	1.01663	0.544187	-0.82957
新疆	2019	1.8323	1.31626	新疆	2019	13597.1	1781.8	4784.4	7030.9	0.18388	8.169	3.38221	12.1768	6.19502	新疆	2.9434	2.9348	2.5631	3.663	13122	10318	4959.89	0.42997	2.21228	257.76	1781.75	9268.73	41	0.306062	2008.1	0.0392159	0.030727	0.0712418	0.0143319	0.0228296	0.00930875	0.060374	0.0591401	0.0165325	0.0612724	0.066526	0.217014	新疆	2.01599	-0.411834	1.2485	0.576251	-0.431313
新疆	2020	1.67051	1.31637	新疆	2020	13800.7	1981.3	4786.7	7032.8	0.20384	8.171	3.83313	12.2511	6.04192	新疆	3.0835	3.1022	2.7385	3.6488	14056	10778	4893.35	0.54974	2.14376	248.23	1981.28	10770.3	43.3	0.334108	2202.31	0.0392159	0.030727	0.0712418	0.0143319	0.0228296	0.00930875	0.060374	0.0591401	0.0165325	0.0612724	0.066526	0.232173	新疆	2.60107	-0.395278	1.67816	0.664619	-0.55949
新疆	2021	1.66728	1.31055	新疆	2021	16311.6	2359.1	6295.9	7656.6	0.158	8.355	4.646	12.2892	6.19685	新疆	3.2318	3.2795	2.9226	3.6351	15575	12821	6666.39	0.34812	2.13207	240.69	2359.1	12385.8	43.1	0.389578	2407.07	0.0392159	0.030727	0.0712418	0.0143319	0.0228296	0.00930875	0.060374	0.0591401	0.0165325	0.0612724	0.066526	0.268947	新疆	1.2574	1.12789	2.45269	0.709777	-0.429778
新疆	2022	1.78501	1.3129	新疆	2022	18042.7	2653.9	7412.3	7976.4	0.138996	8.373	5.02208	12.3155	8.39638	新疆	3.3832	3.4591	3.111	3.6277	16550	12169	6534.69	0.23777	2.11135	243.68	2653.92	13327.1	43	0.408832	2613.44	0.0392159	0.030727	0.0712418	0.0143319	0.0228296	0.00930875	0.060374	0.0591401	0.0165325	0.0612724	0.066526	0.281245	新疆	0.700354	1.27689	2.81104	0.741023	1.41171
江苏	2011	2.45175	1.80406	江苏	2011	48839.2	2908.8	25231.2	20699.2	0.0993503	8.3461	1.71161	11.9333	7.40586	江苏	0.6208	0.667	0.7922	0.1571	10744	8788	3817.92	0.32235	1.8286	337.21	2908.8	26692.6	28.6	0.406396	1110.23	0.0392159	0.030727	0.0712418	0.0143319	0.0228296	0.00930875	0.060374	0.0591401	0.0165325	0.0612724	0.066526	0.383442	江苏	-0.461718	1.05421	-0.343322	0.286979	0.582428
江苏	2012	2.52266	1.81124	江苏	2012	53701.9	3241.4	27150.8	23309.8	0.107303	8.4059	1.92491	11.9455	7.51861	江苏	1.2203	1.0669	1.5655	1.0994	12133	9921	3929.72	0.53104	1.79594	330.95	3241.4	30854.2	28.7	0.44924	1191.92	0.0392159	0.030727	0.0712418	0.0143319	0.0228296	0.00930875	0.060374	0.0591401	0.0165325	0.0612724	0.066526	0.426461	江苏	-0.228611	1.54924	-0.140083	0.30149	0.676822
江苏	2013	2.55962	1.82689	江苏	2013	59349.4	3447.5	29149.4	26752.5	0.111347	8.024	2.09927	11.9582	7.65544	江苏	1.8098	1.4468	2.2309	2.243	13521	10759	3785.27	0.39704	1.7246	326.83	3447.49	36373.3	29.6	0.476933	765.84	0.0392159	0.030727	0.0712418	0.0143319	0.0228296	0.00930875	0.060374	0.0591401	0.0165325	0.0612724	0.066526	0.445873	江苏	-0.11006	-1.61215	0.0260529	0.316625	0.79138
江苏	2014	2.63641	1.84248	江苏	2014	64830.5	3607.4	31048.8	30174.3	0.106145	8.063	2.25416	11.9673	7.76955	江苏	2.0416	1.9318	2.0109	2.4602	14958	11820	3890.53	0.35968	1.63781	323.61	3607.4	41938.6	29.7	0.50004	899.66	0.0392159	0.030727	0.0712418	0.0143319	0.0228296	0.00930875	0.060374	0.0591401	0.0165325	0.0612724	0.066526	0.459066	江苏	-0.262548	-1.28931	0.173647	0.327436	0.886914
江苏	2015	2.75253	1.8552	江苏	2015	71255.9	3952.5	33371.8	33931.7	0.104113	8.165	2.58222	11.9754	7.87265	江苏	2.4401	2.1594	2.1862	3.8284	16257	12883	3952.5	0.4632	1.59439	319.99	3952.47	46246.9	29.9	0.542769	893.82	0.0392159	0.030727	0.0712418	0.0143319	0.0228296	0.00930875	0.060374	0.0591401	0.0165325	0.0612724	0.066526	0.506789	江苏	-0.322125	-0.444946	0.486237	0.33708	0.97323
江苏	2016	2.72583	1.86683	江苏	2016	77350.9	4039.8	35041.5	38269.6	0.0987401	8.204	2.75677	11.9659	7.98586	江苏	2.5375	2.3322	2.5308	3.228	17606	14428	4054.07	0.22119	1.55708	312.52	4039.75	49663.2	30.4	0.561015	907.89	0.0392159	0.030727	0.0712418	0.0143319	0.0228296	0.00930875	0.060374	0.0591401	0.0165325	0.0612724	0.066526	0.537839	江苏	-0.479604	-0.122101	0.652553	0.325799	1.06801
江苏	2017	2.64548	1.88771	江苏	2017	85869.8	4045.2	39124.1	42700.5	0.086453	8.234	2.85093	11.9734	8.11734	江苏	2.9769	2.7232	3.2893	3.2469	19158	15612	4131.88	0.64498	1.51388	303.85	4045.16	53277	30.8	0.570973	918.81	0.0392159	0.030727	0.0712418	0.0143319	0.0228296	0.00930875	0.060374	0.0591401	0.0165325	0.0612724	0.066526	0.560579	江苏	-0.839762	0.126241	0.742268	0.334609	1.17809
江苏	2018	3.38931	1.86139	江苏	2018	93207.6	4141.7	42129.4	46936.5	0.0854971	8.115	2.95579	11.975	8.19702	江苏	3.3402	3.1195	3.3309	4.0862	20845	16567	4179.83	0.46684	1.49874	292.45	4141.71	56207.3	30.8	0.589264	930.24	0.0392159	0.030727	0.0712418	0.0143319	0.0228296	0.00930875	0.060374	0.0591401	0.0165325	0.0612724	0.066526	0.595548	江苏	-0.86778	-0.858849	0.842183	0.336512	1.2448
江苏	2019	3.97805	1.86965	江苏	2019	98656.8	4297.2	43507.5	50852.1	0.0821065	8.169	3.21747	11.9825	8.24615	江苏	3.6193	3.415	3.655	4.2292	22675	17716	4205.44	0.25914	1.45593	286.21	4297.2	59073.8	36.5	0.61966	940.39	0.0392159	0.030727	0.0712418	0.0143319	0.0228296	0.00930875	0.060374	0.0591401	0.0165325	0.0612724	0.066526	0.629263	江苏	-0.967166	-0.411834	1.09153	0.345518	1.28593
江苏	2020	4.10279	1.87744	江苏	2020	102808	4537.6	44631.3	53638.9	0.0797607	8.171	3.53229	11.971	8.23324	江苏	3.8161	3.6211	3.9501	4.217	24198	17022	4224.73	0.34513	1.43434	280.75	4537.6	59251.1	36.5	0.651008	950.69	0.0392159	0.030727	0.0712418	0.0143319	0.0228296	0.00930875	0.060374	0.0591401	0.0165325	0.0612724	0.066526	0.576897	江苏	-1.03593	-0.395278	1.3915	0.331801	1.27512
江苏	2021	4.07377	1.89341	江苏	2021	117392	4721	52678.7	59992.7	0.0758437	8.355	3.73634	11.9706	8.48723	江苏	4.0138	3.8313	4.2537	4.2125	26791	21130	3826.29	0.17327	1.45962	275.56	4721	62687.6	37.5	0.675192	959.9	0.0392159	0.030727	0.0712418	0.0143319	0.0228296	0.00930875	0.060374	0.0591401	0.0165325	0.0612724	0.066526	0.629932	江苏	-1.15074	1.12789	1.58593	0.331313	1.48777
江苏	2022	4.02744	1.89506	江苏	2022	122089	4964.2	54886.1	62239	0.0743797	8.373	4.01001	11.9703	8.59621	江苏	4.2117	4.0493	4.5616	4.2167	28486	22597	3851.74	0.54684	1.43125	270.14	4964.2	65069.8	38.4	0.71268	970.1	0.0392159	0.030727	0.0712418	0.0143319	0.0228296	0.00930875	0.060374	0.0591401	0.0165325	0.0612724	0.066526	0.619569	江苏	-1.19365	1.27689	1.8467	0.331042	1.57901
江西	2011	2.23563	1.62024	江西	2011	11584.5	1320.5	6338	3926	0.113623	8.3461	0.896185	11.8957	6.39393	江西	0.2974	0.1397	0.5482	0.3621	7133	5611	1867.67	0.39682	1.32056	140.77	1320.49	9087.6	49.4	0.245799	4626.8	0.0392159	0.030727	0.0712418	0.0143319	0.0228296	0.00930875	0.060374	0.0591401	0.0165325	0.0612724	0.066526	0.1362	江西	-0.043347	1.05421	-1.1203	0.242337	-0.264784
江西	2012	2.05652	1.67348	江西	2012	12807.7	1439.1	6893.3	4475.2	0.12744	8.4059	1.00229	11.9223	6.51471	江西	0.9193	0.5982	1.3268	1.2392	8103	6176	1907.06	0.59065	1.21679	141.26	1439.14	10774.2	48.5	0.265222	4822.4	0.0392159	0.030727	0.0712418	0.0143319	0.0228296	0.00930875	0.060374	0.0591401	0.0165325	0.0612724	0.066526	0.144299	江西	0.361647	1.54924	-1.01919	0.274018	-0.163658
江西	2013	1.98495	1.70863	江西	2013	14300.2	1540.7	7661.9	5097.7	0.126369	8.024	1.10915	11.9321	6.64053	江西	1.4613	0.9981	1.8373	2.3078	9089	6807	1995.6	0.57783	2.79872	141.58	1540.65	12850.3	48	0.282368	5128.8	0.0392159	0.030727	0.0712418	0.0143319	0.0228296	0.00930875	0.060374	0.0591401	0.0165325	0.0612724	0.066526	0.16597	江西	0.330262	-1.61215	-0.917375	0.285573	-0.0583221
江西	2014	1.89946	1.74189	江西	2014	15667.8	1626.9	8238.7	5802.3	0.128815	8.063	1.20538	11.9545	6.79257	江西	1.7569	1.4873	1.6719	2.8018	10117	7548	2001.57	0.67502	2.67531	142.87	1626.87	15079.3	47.8	0.296841	5351.64	0.0392159	0.030727	0.0712418	0.0143319	0.0228296	0.00930875	0.060374	0.0591401	0.0165325	0.0612724	0.066526	0.175686	江西	0.401945	-1.28931	-0.825682	0.312209	0.0689685
江西	2015	1.91423	1.75937	江西	2015	16780.9	1714.5	8367.7	6698.8	0.126299	8.165	1.31286	11.9616	6.9181	江西	2.0835	1.7086	1.8248	3.7914	11139	8486	2027.67	0.72787	2.51608	143.58	1714.47	17388.1	47.4	0.311845	5577.9	0.0392159	0.030727	0.0712418	0.0143319	0.0228296	0.00930875	0.060374	0.0591401	0.0165325	0.0612724	0.066526	0.193421	江西	0.328192	-0.444946	-0.723267	0.320659	0.174067
江西	2016	1.9451	1.76962	江西	2016	18388.6	1794.1	8732.5	7862	0.125807	8.204	1.45997	11.9948	7.04124	江西	2.2376	1.8879	2.2274	3.4108	12138	9128	2036.83	0.5007	2.57487	141.97	1794.12	19694.2	46.7	0.326678	5674.9	0.0392159	0.030727	0.0712418	0.0143319	0.0228296	0.00930875	0.060374	0.0591401	0.0165325	0.0612724	0.066526	0.210552	江西	0.313767	-0.122101	-0.583099	0.360077	0.277158
江西	2017	1.90466	1.78673	江西	2017	20210.8	1835.3	9444.6	8930.9	0.118891	8.234	1.53559	11.9971	7.15524	江西	2.6717	2.2852	3.0592	3.2438	13242	9870	2039.42	0.69937	2.44131	134.97	1835.26	22085.3	45.9	0.336705	5787.3	0.0392159	0.030727	0.0712418	0.0143319	0.0228296	0.00930875	0.060374	0.0591401	0.0165325	0.0612724	0.066526	0.219828	江西	0.111067	0.126241	-0.511045	0.362832	0.372604
江西	2018	2.29813	1.73232	江西	2018	22716.5	1877.3	10081.2	10758	0.105762	8.115	1.63523	11.995	7.06193	江西	2.9623	2.6646	2.9652	3.94	14460	10885	2032.02	0.68476	2.33244	123.2	1877.33	24536.8	51.2	0.350606	5917.85	0.0392159	0.030727	0.0712418	0.0143319	0.0228296	0.00930875	0.060374	0.0591401	0.0165325	0.0612724	0.066526	0.238548	江西	-0.273771	-0.858849	-0.416101	0.360311	0.294487
江西	2019	2.38071	1.72182	江西	2019	24667.3	2057.7	10820.3	11789.3	0.0970439	8.169	1.88343	12.2507	7.26263	江西	3.1913	2.9432	3.1918	4.0097	15796	12497	2036.14	0.55518	2.2347	115.57	2057.7	26794.2	54.4	0.386838	6070.46	0.0392159	0.030727	0.0712418	0.0143319	0.0228296	0.00930875	0.060374	0.0591401	0.0165325	0.0612724	0.066526	0.25806	江西	-0.529324	-0.411834	-0.179607	0.664113	0.462512
江西	2020	2.50869	1.72487	江西	2020	25782	2243.8	11107.9	12430.2	0.110923	8.171	2.13684	12.2579	7.39339	江西	3.4061	3.1614	3.5323	3.9852	16981	13579	2038.49	0.34383	2.17841	108.81	2243.8	28991.3	51.3	0.412464	6195.89	0.0392159	0.030727	0.0712418	0.0143319	0.0228296	0.00930875	0.060374	0.0591401	0.0165325	0.0612724	0.066526	0.285338	江西	-0.122498	-0.395278	0.0618588	0.672661	0.571985
江西	2021	2.62072	1.74403	江西	2021	29827.8	2334.1	13230.7	14263	0.112446	8.355	2.29642	12.2601	7.56735	江西	3.6296	3.3839	3.8735	3.9644	18684	15663	2158.03	0.3213	2.10471	108.59	2334.1	32122.4	50.7	0.42976	6333.42	0.0392159	0.030727	0.0712418	0.0143319	0.0228296	0.00930875	0.060374	0.0591401	0.0165325	0.0612724	0.066526	0.303865	江西	-0.0778464	1.12789	0.213911	0.675252	0.717627
江西	2022	2.64541	1.75091	江西	2022	31213.8	2466.5	13483	15264.4	0.108173	8.373	2.45934	12.2582	7.62095	江西	3.861	3.6146	4.22	3.9505	19936	16984	2166.49	0.47225	2.01911	107.71	2466.5	34884.9	50.8	0.449835	6468.49	0.0392159	0.030727	0.0712418	0.0143319	0.0228296	0.00930875	0.060374	0.0591401	0.0165325	0.0612724	0.066526	0.314616	江西	-0.203112	1.27689	0.369144	0.673055	0.762506
河北	2011	2.91639	1.59983	河北	2011	21384.7	2702.8	10275.5	8406.4	0.103494	8.3461	1.16146	11.9638	7.53711	河北	0.3242	0.1846	0.4419	0.5715	7187	5666	4596.61	0.38177	0.7999	326.28	2702.8	16389.3	49.8	0.338583	6351.47	0.0392159	0.030727	0.0712418	0.0143319	0.0228296	0.00930875	0.060374	0.0591401	0.0165325	0.0612724	0.066526	0.247775	河北	-0.340248	1.05421	-0.867532	0.323235	0.692313
河北	2012	2.86163	1.62964	河北	2012	23077.5	2914	10919.7	9243.8	0.108745	8.4059	1.26677	12.0018	7.67443	河北	0.8932	0.6546	1.0815	1.339	8158	6451	4603.07	0.56689	0.79231	329.33	2914	19661.3	49.8	0.361378	6411.51	0.0392159	0.030727	0.0712418	0.0143319	0.0228296	0.00930875	0.060374	0.0591401	0.0165325	0.0612724	0.066526	0.261198	河北	-0.186334	1.54924	-0.767186	0.368383	0.807281
河北	2013	2.82396	1.6439	河北	2013	24259.6	3141.9	11178.4	9939.3	0.115909	8.024	1.39497	12.0696	7.79791	河北	1.4498	1.0566	1.6285	2.4235	9188	7377	4349.03	0.47745	0.781959	331.04	3141.85	23194.2	50.1	0.387452	4679.05	0.0392159	0.030727	0.0712418	0.0143319	0.0228296	0.00930875	0.060374	0.0591401	0.0165325	0.0612724	0.066526	0.280878	河北	0.0236466	-1.61215	-0.645034	0.44899	0.910658
河北	2014	2.80736	1.66526	河北	2014	25208.9	3164.7	11476.9	10567.3	0.124756	8.063	1.44907	12.0963	7.91877	河北	1.6076	1.4997	1.3134	2.4986	10186	8248	4404.22	0.5685	0.772641	335.61	3164.71	26671.9	49.9	0.389632	4826.45	0.0392159	0.030727	0.0712418	0.0143319	0.0228296	0.00930875	0.060374	0.0591401	0.0165325	0.0612724	0.066526	0.29053	河北	0.282961	-1.28931	-0.593486	0.480619	1.01185
河北	2015	2.79132	1.68351	河北	2015	26398.4	3100.5	11519.5	11778.4	0.126503	8.165	1.49064	12.1257	8.01142	河北	1.9953	1.7278	1.5145	3.752	11051	9023	4447.98	0.53797	0.761768	335.49	3100.54	29448.3	49.9	0.383116	5061.55	0.0392159	0.030727	0.0712418	0.0143319	0.0228296	0.00930875	0.060374	0.0591401	0.0165325	0.0612724	0.066526	0.304606	河北	0.334182	-0.444946	-0.553873	0.515586	1.08942
河北	2016	2.63157	1.70807	河北	2016	28474.1	3082.5	12332.3	13059.3	0.132372	8.204	1.55772	12.1465	8.1044	河北	2.1436	1.9155	1.9687	3.2146	11919	9798	4457.64	0.3882	1.14395	331.79	3082.5	31750	50	0.38206	5187.9	0.0392159	0.030727	0.0712418	0.0143319	0.0228296	0.00930875	0.060374	0.0591401	0.0165325	0.0612724	0.066526	0.331947	河北	0.506215	-0.122101	-0.489951	0.540291	1.16726
河北	2017	2.27257	1.7366	河北	2017	30640.8	3130	12778	14732.8	0.117923	8.234	1.63858	12.1637	8.18404	河北	2.5817	2.3289	2.7345	3.1387	12881	10536	4474.67	0.46838	1.10567	322	3129.98	33406.8	51.9	0.393514	5379.15	0.0392159	0.030727	0.0712418	0.0143319	0.0228296	0.00930875	0.060374	0.0591401	0.0165325	0.0612724	0.066526	0.352086	河北	0.0826715	0.126241	-0.412909	0.56068	1.23394
河北	2018	2.30919	1.72658	河北	2018	32494.6	3338.6	12904.1	16252	0.117298	8.115	1.80098	12.1717	8.26289	河北	2.8277	2.6406	2.6792	3.7155	14031	11383	4492.33	0.63914	1.06371	312.4	3338.59	35411.2	51.7	0.429699	5532.54	0.0392159	0.030727	0.0712418	0.0143319	0.0228296	0.00930875	0.060374	0.0591401	0.0165325	0.0612724	0.066526	0.368164	河北	0.0643645	-0.858849	-0.258167	0.570303	1.29995
河北	2019	3.00288	1.66862	河北	2019	34978.6	3518.4	13393.7	18066.4	0.117736	8.169	1.9742	12.1909	7.93812	河北	3.0506	2.8439	2.9733	3.8738	15373	12372	4482.16	0.46076	1.03856	297.27	3518.44	37712.9	53.2	0.458335	5722.22	0.0392159	0.030727	0.0712418	0.0143319	0.0228296	0.00930875	0.060374	0.0591401	0.0165325	0.0612724	0.066526	0.394385	河北	0.0771882	-0.411834	-0.0931106	0.59302	1.02805
河北	2020	3.41336	1.74886	河北	2020	36013.8	3880.4	13765.1	18368.4	0.109583	8.171	2.26226	12.2295	7.73197	河北	3.227	3.041	3.1842	3.9192	16467	12644	4470.03	0.25498	1.01553	285.71	3880.4	38919.8	60.5	0.508465	5934.37	0.0392159	0.030727	0.0712418	0.0143319	0.0228296	0.00930875	0.060374	0.0591401	0.0165325	0.0612724	0.066526	0.421133	河北	-0.161794	-0.395278	0.181363	0.638887	0.855458
河北	2021	3.54742	1.7773	河北	2021	40397.1	4030.4	16355.8	20010.9	0.104517	8.355	2.42525	12.2413	7.61515	河北	3.4099	3.2468	3.3956	3.9684	18179	15391	3952.24	0.49396	1.00005	276.87	4030.4	40087.3	57	0.529343	6147.02	0.0392159	0.030727	0.0712418	0.0143319	0.0228296	0.00930875	0.060374	0.0591401	0.0165325	0.0612724	0.066526	0.431027	河北	-0.310268	1.12789	0.336664	0.652921	0.75765
河北	2022	3.31409	1.75803	河北	2022	41988	4408.6	16129.6	21449.8	0.0937217	8.373	2.69505	12.2511	7.59529	河北	3.5967	3.4528	3.6139	4.0187	19364	16271	4102.86	0.43237	0.983624	271.64	4408.6	43254.2	55.4	0.578926	6359.83	0.0392159	0.030727	0.0712418	0.0143319	0.0228296	0.00930875	0.060374	0.0591401	0.0165325	0.0612724	0.066526	0.449055	河北	-0.626704	1.27689	0.593741	0.664556	0.74102
河南	2011	2.35456	1.67365	河南	2011	26318.7	3349.3	14021.6	8947.8	0.113086	8.3461	1.0752	12.4195	7.3975	河南	0.284	0.1354	0.3811	0.5981	6989	4881	5150.44	0.25731	1.36683	673.71	3349.25	17769	44.1	0.238017	4412.59	0.0392159	0.030727	0.0712418	0.0143319	0.0228296	0.00930875	0.060374	0.0591401	0.0165325	0.0612724	0.066526	0.24186	河南	-0.0591147	1.05421	-0.949722	0.864646	0.575429
河南	2012	2.32234	1.68902	河南	2012	28961.9	3577.2	15042.6	10342.2	0.110205	8.4059	1.17065	12.4278	7.54639	河南	0.8368	0.6193	0.9807	1.2937	7963	5686	5205.63	0.23466	1.32321	684.43	3577.15	21450	42.2	0.253995	4510.86	0.0392159	0.030727	0.0712418	0.0143319	0.0228296	0.00930875	0.060374	0.0591401	0.0165325	0.0612724	0.066526	0.259847	河南	-0.14355	1.54924	-0.858773	0.874499	0.700085
河南	2013	2.3233	1.71055	河南	2013	31632.5	3827.2	15995.4	11809.9	0.11283	8.024	1.2851	12.4285	7.69157	河南	1.4208	1.0506	1.5523	2.4042	8969	6359	4969.11	0.30409	1.30821	696.37	3827.2	26087.5	42.6	0.268296	3236.74	0.0392159	0.030727	0.0712418	0.0143319	0.0228296	0.00930875	0.060374	0.0591401	0.0165325	0.0612724	0.066526	0.269253	河南	-0.0666153	-1.61215	-0.749723	0.875365	0.821626
河南	2014	1.96555	1.7347	河南	2014	34574.8	3988.2	17139.6	13446.9	0.109798	8.063	1.36686	12.4286	7.82481	河南	1.6665	1.5752	1.3224	2.5931	9966	7277	5101.15	0.43224	1.28359	705.75	3988.22	30782.2	41.5	0.277629	3441.74	0.0392159	0.030727	0.0712418	0.0143319	0.0228296	0.00930875	0.060374	0.0591401	0.0165325	0.0612724	0.066526	0.283294	河南	-0.155469	-1.28931	-0.671819	0.875489	0.933178
河南	2015	1.85705	1.7579	河南	2015	37084.1	4015.6	17947.9	15120.7	0.116427	8.165	1.42015	12.4315	7.95641	河南	2.0534	1.815	1.5105	3.8273	10853	7887	5210.64	0.32608	1.27068	716.09	4015.56	35660.3	42.7	0.279199	3559.76	0.0392159	0.030727	0.0712418	0.0143319	0.0228296	0.00930875	0.060374	0.0591401	0.0165325	0.0612724	0.066526	0.312281	河南	0.0388392	-0.444946	-0.621037	0.87894	1.04336
河南	2016	1.78561	1.77938	河南	2016	40249.3	4063.6	18986.9	17198.8	0.108276	8.204	1.47872	12.4967	8.07667	河南	2.2312	2.0065	1.9922	3.408	11697	8587	5242.92	0.45908	1.51221	715.03	4063.65	40415.1	42.7	0.282995	3600.81	0.0392159	0.030727	0.0712418	0.0143319	0.0228296	0.00930875	0.060374	0.0591401	0.0165325	0.0612724	0.066526	0.331179	河南	-0.200095	-0.122101	-0.565232	0.956284	1.14404
河南	2017	1.69457	1.79556	河南	2017	44824.9	4139.3	20940.3	19745.3	0.111595	8.234	1.5564	12.498	8.19486	河南	2.6692	2.4145	2.7956	3.2809	12719	9212	5273.63	0.52005	1.46763	706.7	4139.29	44496.9	42.9	0.292591	3672.95	0.0392159	0.030727	0.0712418	0.0143319	0.0228296	0.00930875	0.060374	0.0591401	0.0165325	0.0612724	0.066526	0.359164	河南	-0.102808	0.126241	-0.491217	0.9579	1.243
河南	2018	2.36338	1.6787	河南	2018	49935.9	4311.1	22038.6	23586.2	0.108604	8.115	1.64677	12.5009	8.28544	河南	2.9576	2.7846	2.7574	3.8927	13831	10392	5288.69	0.72835	1.44871	692.79	4311.12	48101.2	42.8	0.304478	3778.27	0.0392159	0.030727	0.0712418	0.0143319	0.0228296	0.00930875	0.060374	0.0591401	0.0165325	0.0612724	0.066526	0.387457	河南	-0.190483	-0.858849	-0.405104	0.961373	1.31883
河南	2019	2.47585	1.65636	河南	2019	53717.8	4635.7	23035.6	26046.5	0.104261	8.169	1.87608	12.5056	8.33764	河南	3.2212	3.0934	3.0185	4.0116	15164	11546	5328.95	0.39596	1.42068	666.72	4635.7	51949.3	48.1	0.330346	3913.36	0.0392159	0.030727	0.0712418	0.0143319	0.0228296	0.00930875	0.060374	0.0591401	0.0165325	0.0612724	0.066526	0.419175	河南	-0.317782	-0.411834	-0.186613	0.966858	1.36253
河南	2020	2.66751	1.6269	河南	2020	54259.4	5354	22220.9	26684.5	0.110425	8.171	2.24698	12.5072	8.30187	河南	3.4081	3.3116	3.2121	4.0832	16108	12201	5463.07	0.21703	1.40371	647.98	5354.02	54183.1	49.6	0.381298	4033.79	0.0392159	0.030727	0.0712418	0.0143319	0.0228296	0.00930875	0.060374	0.0591401	0.0165325	0.0612724	0.066526	0.463069	河南	-0.137105	-0.395278	0.166798	0.968789	1.33258
河南	2021	2.79196	1.65938	河南	2021	58071.4	5626.9	23566.4	28878.2	0.10376	8.355	2.43987	12.512	8.34091	河南	3.6018	3.5357	3.4104	4.1573	17533	14073	5518.24	0.42315	1.38074	624.66	5626.9	56621.3	49.1	0.402268	4141.81	0.0392159	0.030727	0.0712418	0.0143319	0.0228296	0.00930875	0.060374	0.0591401	0.0165325	0.0612724	0.066526	0.481702	河南	-0.332456	1.12789	0.350596	0.974485	1.36527
河南	2022	2.90807	1.67157	河南	2022	58220.1	5731.3	22140.6	30348.2	0.104302	8.373	2.58368	12.5335	8.31312	河南	3.8015	3.7602	3.614	4.2335	18697	14824	5623.22	0.09804	1.35482	595.31	5731.3	60415	48.4	0.419386	4269.67	0.0392159	0.030727	0.0712418	0.0143319	0.0228296	0.00930875	0.060374	0.0591401	0.0165325	0.0612724	0.066526	0.508306	河南	-0.316568	1.27689	0.487629	1.00007	1.342
浙江	2011	2.46688	1.88029	浙江	2011	31854.8	1535.2	16271	14048.6	0.0971532	8.3461	1.19099	11.6243	7.29329	浙江	0.7739	0.8553	0.9352	0.2122	14197	10849	1456.8	0.36952	0.921418	92.07	1535.2	14185.3	36.3	0.687041	2457.64	0.0392159	0.030727	0.0712418	0.0143319	0.0228296	0.00930875	0.060374	0.0591401	0.0165325	0.0612724	0.066526	0.262404	浙江	-0.526119	1.05421	-0.839392	-0.0801171	0.488182
浙江	2012	2.47868	1.90267	浙江	2012	34382.4	1610.8	17040.5	15731.1	0.0980807	8.4059	1.23996	11.64	7.66753	浙江	1.4635	1.285	2.0042	1.0707	15806	11598	1471.02	0.45724	0.841837	92.15	1610.81	17649.4	39.8	0.780562	2515.46	0.0392159	0.030727	0.0712418	0.0143319	0.0228296	0.00930875	0.060374	0.0591401	0.0165325	0.0612724	0.066526	0.290431	浙江	-0.498934	1.54924	-0.79273	-0.0614099	0.801505
浙江	2013	2.66816	1.91956	浙江	2013	37334.6	1718.7	18162.8	17453.1	0.108452	8.024	1.33275	11.6564	7.80454	浙江	2.0577	1.6796	2.6548	2.2212	17494	12803	1409.39	0.44208	0.837645	92.43	1718.74	20782.1	39.5	0.846421	3645.59	0.0392159	0.030727	0.0712418	0.0143319	0.0228296	0.00930875	0.060374	0.0591401	0.0165325	0.0612724	0.066526	0.320425	浙江	-0.194925	-1.61215	-0.70432	-0.0419436	0.916208
浙江	2014	3.03853	1.94948	浙江	2014	40023.5	1726.6	19580.7	18716.2	0.101673	8.063	1.34385	11.6645	7.97322	浙江	2.2445	2.1748	2.3367	2.3071	19373	14498	1425.37	0.48431	0.820935	89.62	1726.57	24262.8	39	0.883847	3644.48	0.0392159	0.030727	0.0712418	0.0143319	0.0228296	0.00930875	0.060374	0.0591401	0.0165325	0.0612724	0.066526	0.316419	浙江	-0.39363	-1.28931	-0.693744	-0.0322983	1.05744
浙江	2015	3.5195	1.97642	浙江	2015	43507.7	1771.4	20606.6	21129.8	0.111207	8.165	1.41149	11.6786	8.09016	浙江	2.6485	2.3933	2.5129	3.7377	21125	16108	1432.15	0.46796	0.837792	87.52	1771.36	27323.3	39	0.912023	3655.4	0.0392159	0.030727	0.0712418	0.0143319	0.0228296	0.00930875	0.060374	0.0591401	0.0165325	0.0612724	0.066526	0.349142	浙江	-0.114175	-0.444946	-0.629292	-0.0155917	1.15533
浙江	2016	4.26567	2.00854	浙江	2016	47254	1890.4	21571.3	23792.4	0.103582	8.204	1.55025	11.6873	8.21344	浙江	2.681	2.5444	2.7062	3.0866	22866	17359	1446.31	0.37675	0.91097	84.48	1890.43	30276.1	39.3	0.989232	3699.86	0.0392159	0.030727	0.0712418	0.0143319	0.0228296	0.00930875	0.060374	0.0591401	0.0165325	0.0612724	0.066526	0.364449	浙江	-0.337671	-0.122101	-0.497074	-0.00518851	1.25855
浙江	2017	5.29761	2.03877	浙江	2017	52403.1	1933.9	23246.7	27222.5	0.092518	8.234	1.61281	11.6961	8.32855	浙江	3.1805	2.9006	3.664	3.2266	24956	18093	1444.7	0.50047	0.95601	82.63	1933.92	31696	38.3	0.995805	3721.06	0.0392159	0.030727	0.0712418	0.0143319	0.0228296	0.00930875	0.060374	0.0591401	0.0165325	0.0612724	0.066526	0.381712	浙江	-0.661986	0.126241	-0.437468	0.00522299	1.35492
浙江	2018	5.84499	2.06437	浙江	2018	58002.8	1975.9	25308.1	30718.8	0.0839513	8.115	1.6785	11.7007	8.37591	浙江	3.5745	3.3017	3.7201	4.2107	27302	19707	1440.8	0.63642	0.984746	77.76	1975.89	33946.4	36.7	1.02053	3692.54	0.0392159	0.030727	0.0712418	0.0143319	0.0228296	0.00930875	0.060374	0.0591401	0.0165325	0.0612724	0.066526	0.424901	浙江	-0.913092	-0.858849	-0.374876	0.0107602	1.39457
浙江	2019	6.05299	2.08454	浙江	2019	62462	2086.7	26299.5	34075.8	0.0740314	8.169	1.91182	11.7102	8.383	浙江	3.8749	3.624	4.0465	4.3916	29876	21352	1405.43	0.34652	1.048	72.5	2086.7	37341.1	38.2	1.06815	3611.39	0.0392159	0.030727	0.0712418	0.0143319	0.0228296	0.00930875	0.060374	0.0591401	0.0165325	0.0612724	0.066526	0.449337	浙江	-1.20386	-0.411834	-0.15255	0.0220377	1.40051
浙江	2020	6.49645	2.1148	浙江	2020	64689.1	2166.3	26361.5	36161.3	0.0758668	8.171	1.94609	11.7206	8.36483	浙江	4.0688	3.8207	4.3925	4.2998	31930	21555	1415.7	0.38826	1.11104	69.61	2166.3	39357.5	38.3	1.10271	3659.68	0.0392159	0.030727	0.0712418	0.0143319	0.0228296	0.00930875	0.060374	0.0591401	0.0165325	0.0612724	0.066526	0.431547	浙江	-1.15006	-0.395278	-0.119904	0.034331	1.3853
浙江	2021	7.48144	2.13889	浙江	2021	74040.8	2211.7	31174	40655.1	0.0722015	8.355	2.0018	11.7271	8.38432	浙江	4.2685	4.0249	4.7445	4.2134	35247	25415	1260.54	0.25452	1.13584	68.26	2211.7	43608.1	37.3	1.13025	3702.58	0.0392159	0.030727	0.0712418	0.0143319	0.0228296	0.00930875	0.060374	0.0591401	0.0165325	0.0612724	0.066526	0.468642	浙江	-1.2575	1.12789	-0.066821	0.0420755	1.40162
浙江	2022	6.15849	2.11288	浙江	2022	78060.6	2185.2	32973.8	42901.6	0.0691642	8.373	2.14295	11.7193	8.41775	浙江	4.4719	4.2314	5.1035	4.1361	37565	27483	1226.14	0.43102	1.14687	67.05	2185.2	47576.5	37.3	1.18244	3744.64	0.0392159	0.030727	0.0712418	0.0143319	0.0228296	0.00930875	0.060374	0.0591401	0.0165325	0.0612724	0.066526	0.507978	浙江	-1.34653	1.27689	0.06768	0.0327664	1.4296
海南	2011	2.24279	1.21994	海南	2011	2463.8	636.6	671.3	1155.9	0.135632	8.3461	2.24328	10.0396	4.29592	海南	0.4556	0.3096	0.5774	0.7163	6801	4860	247.51	0.38328	1.76085	47.73	636.64	1657.23	26.9	0.832566	37.74	0.0392159	0.030727	0.0712418	0.0143319	0.0228296	0.00930875	0.060374	0.0591401	0.0165325	0.0612724	0.066526	0.0714745	海南	0.601756	1.05421	0.163277	-1.96267	-2.02127
海南	2012	2.03006	1.25148	海南	2012	2789.4	683.9	747.2	1358.3	0.135597	8.4059	2.39312	10.0968	4.6386	海南	1.0294	0.7951	1.2072	1.4798	7816	5572	256.75	0.63636	1.63985	45.53	683.85	2145.38	28.6	0.891211	38.72	0.0392159	0.030727	0.0712418	0.0143319	0.0228296	0.00930875	0.060374	0.0591401	0.0165325	0.0612724	0.066526	0.0734443	海南	0.600747	1.54924	0.306047	-1.89472	-1.73437
海南	2013	1.7562	1.26801	海南	2013	3115.9	723.6	750.9	1641.4	0.137494	8.024	2.56476	10.1207	4.82109	海南	1.5826	1.2175	1.7337	2.5139	8802	6376	260.93	0.56527	1.5385	47.57	723.6	2697.9	28.9	0.961449	56.6	0.0392159	0.030727	0.0712418	0.0143319	0.0228296	0.00930875	0.060374	0.0591401	0.0165325	0.0612724	0.066526	0.0803839	海南	0.656348	-1.61215	0.469598	-1.86632	-1.58159
海南	2014	1.71186	1.25569	海南	2014	3449	793.2	826.5	1829.3	0.133031	8.063	2.8081	10.1659	5.06575	海南	1.7962	1.7099	1.538	2.5503	9913	7029	259.92	0.67065	1.50664	49.46	793.15	3112.23	28.5	1.04529	58.78	0.0392159	0.030727	0.0712418	0.0143319	0.0228296	0.00930875	0.060374	0.0591401	0.0165325	0.0612724	0.066526	0.0849808	海南	0.525536	-1.28931	0.701463	-1.81258	-1.37675
海南	2015	1.6852	1.26247	海南	2015	3734.2	835.4	882.9	2016	0.132513	8.165	3.03756	10.1984	5.40358	海南	2.3033	1.9226	1.8491	4.3859	10858	8210	263.99	0.49029	1.48068	51.14	835.35	3451.22	32.4	1.13439	74.58	0.0392159	0.030727	0.0712418	0.0143319	0.0228296	0.00930875	0.060374	0.0591401	0.0165325	0.0612724	0.066526	0.0970125	海南	0.510326	-0.444946	0.920101	-1.77402	-1.09392
海南	2016	1.72466	1.25785	海南	2016	4090.2	924.7	904	2261.5	0.130071	8.204	3.46348	10.2477	5.41388	海南	2.3156	2.1009	2.2035	3.2283	11843	8921	289.95	0.19301	1.41685	50.62	924.74	3890.45	31.6	1.30018	96.13	0.0392159	0.030727	0.0712418	0.0143319	0.0228296	0.00930875	0.060374	0.0591401	0.0165325	0.0612724	0.066526	0.111749	海南	0.438758	-0.122101	1.32594	-1.71546	-1.0853
海南	2017	1.67422	1.28248	海南	2017	4497.5	962.8	996.4	2538.4	0.137413	8.234	3.64917	10.3315	5.54361	海南	2.7564	2.5339	2.9753	3.0934	12902	9599	289.25	0.24074	1.24507	51.36	962.84	4244.4	32.8	1.40012	108.42	0.0392159	0.030727	0.0712418	0.0143319	0.0228296	0.00930875	0.060374	0.0591401	0.0165325	0.0612724	0.066526	0.118636	海南	0.653963	0.126241	1.50287	-1.61588	-0.976681
海南	2018	1.6457	1.30246	海南	2018	4910.7	986	1053.1	2871.6	0.134636	8.115	3.82975	10.4638	5.67641	海南	3.0972	2.944	3.0023	3.7754	13989	10956	290.48	0.34877	1.26001	48.37	985.96	3713.85	33.3	1.43098	116.72	0.0392159	0.030727	0.0712418	0.0143319	0.0228296	0.00930875	0.060374	0.0591401	0.0165325	0.0612724	0.066526	0.122641	海南	0.572571	-0.858849	1.67494	-1.45877	-0.865501
海南	2019	1.62647	1.29422	海南	2019	5330.8	1079	1083.8	3168.1	0.135263	8.169	4.17775	10.5481	5.74044	海南	3.2875	3.1941	3.1446	3.8558	15113	12418	290.63	0.16667	1.16346	46.26	1079	3372.18	34.9	1.65326	136.81	0.0392159	0.030727	0.0712418	0.0143319	0.0228296	0.00930875	0.060374	0.0591401	0.0165325	0.0612724	0.066526	0.138696	海南	0.59095	-0.411834	2.00653	-1.35851	-0.811898
海南	2020	1.63256	1.30712	海南	2020	5566.2	1136	1072.2	3358	0.13616	8.171	4.52765	10.6007	5.88249	海南	3.4405	3.3587	3.3724	3.8346	16279	13169	292.21	0.34653	1.09957	42.61	1135.98	3641.95	46	1.74098	139.33	0.0392159	0.030727	0.0712418	0.0143319	0.0228296	0.00930875	0.060374	0.0591401	0.0165325	0.0612724	0.066526	0.149547	海南	0.617238	-0.395278	2.33992	-1.29607	-0.692971
海南	2021	1.64351	1.32182	海南	2021	6504.1	1254.4	1240.8	4008.8	0.132253	8.355	5.06229	10.6224	6.01591	海南	3.5983	3.5274	3.6023	3.8182	18076	15487	326.62	0.32288	1.08566	40.77	1254.44	4013.43	35.6	1.89944	147.3	0.0392159	0.030727	0.0712418	0.0143319	0.0228296	0.00930875	0.060374	0.0591401	0.0165325	0.0612724	0.066526	0.161745	海南	0.502725	1.12789	2.84935	-1.27024	-0.581263
海南	2022	1.67305	1.31312	海南	2022	6889.6	1417.9	1308.7	4163.1	0.126659	8.373	5.74415	10.6379	5.9197	海南	3.7598	3.7027	3.8326	3.8099	19117	15145	330.17	0.42857	1.08765	38.64	1417.9	3844.86	41.7	2.14121	159.35	0.0392159	0.030727	0.0712418	0.0143319	0.0228296	0.00930875	0.060374	0.0591401	0.0165325	0.0612724	0.066526	0.174994	海南	0.338737	1.27689	3.49906	-1.25184	-0.661815
湖北	2011	1.68914	1.65241	湖北	2011	19942.5	2469.2	9766.1	7707.1	0.117033	8.3461	1.47982	12.2679	7.14795	湖北	0.3982	0.3517	0.5356	0.3018	7540	6264	2455.69	0.30632	2.08751	354.89	2469.2	12557.3	28	0.337855	4832.72	0.0392159	0.030727	0.0712418	0.0143319	0.0228296	0.00930875	0.060374	0.0591401	0.0165325	0.0612724	0.066526	0.18061	湖北	0.0565869	1.05421	-0.564181	0.684479	0.366503
湖北	2012	1.57041	1.68494	湖北	2012	22590.9	2674.8	11152.6	8763.5	0.111448	8.4059	1.67994	12.2929	7.27925	湖北	1.0142	0.8206	1.2584	1.21	8582	7159	2548.91	0.44574	2.00002	354.89	2674.82	15578.3	28.1	0.355643	4760.38	0.0392159	0.030727	0.0712418	0.0143319	0.0228296	0.00930875	0.060374	0.0591401	0.0165325	0.0612724	0.066526	0.191369	湖北	-0.107122	1.54924	-0.373503	0.714278	0.476427
湖北	2013	1.50936	1.71202	湖北	2013	25378	2883.7	11846.3	10648	0.106445	8.024	1.86545	12.3323	7.4513	湖北	1.6476	1.2374	1.9704	2.4151	9692	7850	2791.41	0.38358	1.89443	351.93	2883.73	19307.3	29.4	0.381775	5179.03	0.0392159	0.030727	0.0712418	0.0143319	0.0228296	0.00930875	0.060374	0.0591401	0.0165325	0.0612724	0.066526	0.210793	湖北	-0.253762	-1.61215	-0.196742	0.761055	0.620471
湖北	2014	1.51524	1.73467	湖北	2014	28242.1	3001.6	13007.9	12232.6	0.0980513	8.063	2.00523	12.3755	7.57789	湖北	1.9014	1.7661	1.757	2.6107	10849	8681	2855.32	0.32442	1.81495	348.27	3001.59	22915.3	32.6	0.395384	5414.41	0.0392159	0.030727	0.0712418	0.0143319	0.0228296	0.00930875	0.060374	0.0591401	0.0165325	0.0612724	0.066526	0.224323	湖北	-0.499794	-1.28931	-0.0635505	0.812394	0.726455
湖北	2015	1.50943	1.74874	湖北	2015	30344	3109.9	13569.5	13664.6	0.100536	8.165	2.15058	12.4411	7.70881	湖北	2.2675	1.9953	1.8908	3.8507	11844	9803	2899.15	0.46146	1.78675	333.87	3109.93	26563.9	32.8	0.402196	5634.3	0.0392159	0.030727	0.0712418	0.0143319	0.0228296	0.00930875	0.060374	0.0591401	0.0165325	0.0612724	0.066526	0.239806	湖北	-0.42697	-0.444946	0.0749446	0.890246	0.836068
湖北	2016	1.55837	1.75552	湖北	2016	33353	3406.5	14527	15419.5	0.109698	8.204	2.40508	12.4691	7.82389	湖北	2.3986	2.1555	2.3341	3.3183	12725	10938	2905.57	0.54925	1.88848	327.96	3406.46	30011.7	32.9	0.44609	5830.58	0.0392159	0.030727	0.0712418	0.0143319	0.0228296	0.00930875	0.060374	0.0591401	0.0165325	0.0612724	0.066526	0.258225	湖北	-0.1584	-0.122101	0.317451	0.92358	0.932408
湖北	2017	1.80246	1.73038	湖北	2017	37235	3529	15713.9	17992.2	0.105088	8.234	2.58782	12.5043	7.93387	湖北	2.8528	2.5363	3.1758	3.311	13812	11633	2919.17	0.49753	1.83529	317.93	3528.96	32282.4	32.9	0.46383	5963.49	0.0392159	0.030727	0.0712418	0.0143319	0.0228296	0.00930875	0.060374	0.0591401	0.0165325	0.0612724	0.066526	0.277206	湖北	-0.29354	0.126241	0.491571	0.965324	1.02449
湖北	2018	1.92126	1.7283	湖北	2018	42022	3548.2	17573.9	20899.9	0.108228	8.115	2.69013	12.5247	7.99301	湖北	3.1948	2.9256	3.2244	4.0299	14978	13946	2931.9	0.44225	1.79742	295.82	3548.17	35833.4	33.1	0.469552	6134.72	0.0392159	0.030727	0.0712418	0.0143319	0.0228296	0.00930875	0.060374	0.0591401	0.0165325	0.0612724	0.066526	0.305047	湖北	-0.201489	-0.858849	0.589057	0.989564	1.074
湖北	2019	1.99573	1.73068	湖北	2019	45429	3809.4	18723	22896.5	0.103913	8.169	2.95351	12.5743	8.13485	湖北	3.444	3.2079	3.4853	4.1489	16391	15328	2968.99	0.33256	1.73081	273.89	3809.4	39667.6	37.3	0.513608	6270.38	0.0392159	0.030727	0.0712418	0.0143319	0.0228296	0.00930875	0.060374	0.0591401	0.0165325	0.0612724	0.066526	0.335026	湖北	-0.327972	-0.411834	0.840018	1.0485	1.19275
湖北	2020	2.23359	1.68696	湖北	2020	43004.5	4133.2	15933.8	22937.6	0.102915	8.171	3.40779	12.5763	7.90108	湖北	3.5864	3.3654	3.6958	4.1173	16306	14472	3086.04	0.47929	1.72379	267.32	4133.2	32210.1	40.7	0.546625	6396.04	0.0392159	0.030727	0.0712418	0.0143319	0.0228296	0.00930875	0.060374	0.0591401	0.0165325	0.0612724	0.066526	0.349843	湖北	-0.357228	-0.395278	1.27287	1.0509	0.997037
湖北	2021	2.41593	1.69524	湖北	2021	50091.2	4635.2	19332.1	26123.9	0.106086	8.355	3.96286	12.6012	8.01942	湖北	3.7369	3.5234	3.9088	4.0917	18259	17647	3111.09	0.40687	1.7139	262.62	4635.2	38780.9	40.6	0.607135	6568.5	0.0392159	0.030727	0.0712418	0.0143319	0.0228296	0.00930875	0.060374	0.0591401	0.0165325	0.0612724	0.066526	0.384872	湖北	-0.264288	1.12789	1.80177	1.08051	1.09611
湖北	2022	2.46044	1.70022	湖北	2022	52741.7	4982.1	19793.7	27965.8	0.107242	8.373	4.32897	12.6188	8.05226	湖北	3.888	3.6837	4.131	4.0689	19709	18991	3208.84	0.28852	1.67914	257.98	4982.1	44598.1	40.8	0.649652	6730.96	0.0392159	0.030727	0.0712418	0.0143319	0.0228296	0.00930875	0.060374	0.0591401	0.0165325	0.0612724	0.066526	0.413202	湖北	-0.230402	1.27689	2.15062	1.10136	1.12361
湖南	2011	1.95238	1.60931	湖南	2011	18915	2420	8883.6	7611.4	0.111981	8.3461	1.13502	12.3553	6.48387	湖南	0.3268	0.1533	0.6073	0.3902	7082	6138	2762.41	0.40214	1.65696	242.49	2420	11880.9	38.3	0.306894	2906.91	0.0392159	0.030727	0.0712418	0.0143319	0.0228296	0.00930875	0.060374	0.0591401	0.0165325	0.0612724	0.066526	0.166955	湖南	-0.0914755	1.05421	-0.892724	0.78837	-0.189479
湖南	2012	1.95251	1.62481	湖南	2012	21207.2	2567.9	9926.7	8712.7	0.108701	8.4059	1.23881	12.3632	6.6034	湖南	0.9371	0.6339	1.3238	1.2356	8024	6956	2715.78	0.51309	1.59939	249.11	2567.85	14523.2	39.1	0.321834	2857.3	0.0392159	0.030727	0.0712418	0.0143319	0.0228296	0.00930875	0.060374	0.0591401	0.0165325	0.0612724	0.066526	0.176317	湖南	-0.187629	1.54924	-0.793828	0.797798	-0.089406
湖南	2013	1.86141	1.6551	湖南	2013	23545.2	2589.2	10913.8	10042.3	0.110118	8.024	1.28261	12.369	6.75589	湖南	1.4771	1.0346	1.75	2.4425	9029	7833	3084.3	0.50883	1.53712	248.19	2589.18	17841.4	41	0.323501	2998.96	0.0392159	0.030727	0.0712418	0.0143319	0.0228296	0.00930875	0.060374	0.0591401	0.0165325	0.0612724	0.066526	0.192354	湖南	-0.146107	-1.61215	-0.752096	0.804641	0.0382563
湖南	2014	1.81355	1.67217	湖南	2014	25881.3	2671	11825.1	11385.2	0.111132	8.063	1.35698	12.3726	6.92353	湖南	1.6727	1.5042	1.5346	2.4799	10060	9025	3101.7	0.58129	1.48069	247.8	2671.01	21242.9	41.2	0.332566	3108.97	0.0392159	0.030727	0.0712418	0.0143319	0.0228296	0.00930875	0.060374	0.0591401	0.0165325	0.0612724	0.066526	0.202918	湖南	-0.116384	-1.28931	-0.681234	0.808964	0.178612
湖南	2015	1.76055	1.69142	湖南	2015	28538.6	2747.9	12665.7	13125	0.118044	8.165	1.4385	12.3753	7.03896	湖南	2.0638	1.7007	1.7447	3.8424	10993	9691	3113.32	0.54947	1.41757	246.54	2747.91	25045.1	41.4	0.344563	3259.77	0.0392159	0.030727	0.0712418	0.0143319	0.0228296	0.00930875	0.060374	0.0591401	0.0165325	0.0612724	0.066526	0.219693	湖南	0.0862221	-0.444946	-0.603556	0.812157	0.275251
湖南	2016	1.80496	1.69804	湖南	2016	30853.5	2915.6	12942	14995.9	0.115118	8.204	1.61376	12.3812	7.16232	湖南	2.1769	1.8613	2.198	3.1807	11930	10630	3132.37	0.42326	1.36801	246.44	2915.58	28353.3	41.9	0.367212	3433.77	0.0392159	0.030727	0.0712418	0.0143319	0.0228296	0.00930875	0.060374	0.0591401	0.0165325	0.0612724	0.066526	0.240077	湖南	0.000454539	-0.122101	-0.43656	0.819093	0.378531
湖南	2017	1.7241	1.71583	湖南	2017	33828.1	2998.4	13459.8	17369.9	0.113899	8.234	1.73205	12.3872	7.27476	湖南	2.6112	2.2347	2.977	3.1896	12936	11534	3145.87	0.45742	1.33049	245.26	2998.4	31959.2	42.6	0.380355	3592.19	0.0392159	0.030727	0.0712418	0.0143319	0.0228296	0.00930875	0.060374	0.0591401	0.0165325	0.0612724	0.066526	0.262599	湖南	-0.0352557	0.126241	-0.323843	0.826306	0.472666
湖南	2018	1.87519	1.69514	湖南	2018	36329.7	3084.2	13904.1	19341.4	0.123746	8.115	1.84058	12.3886	7.32211	湖南	2.8681	2.5807	2.8655	3.8219	14093	12721	3164	0.49536	1.27964	242.61	3084.18	35155.2	42	0.40272	3745.54	0.0392159	0.030727	0.0712418	0.0143319	0.0228296	0.00930875	0.060374	0.0591401	0.0165325	0.0612724	0.066526	0.28914	湖南	0.253356	-0.858849	-0.220431	0.82797	0.512314
湖南	2019	1.98973	1.67285	湖南	2019	39894.1	3647.2	15401.7	20845.2	0.121811	8.169	2.26728	12.3908	7.71141	湖南	3.1085	2.8228	3.1181	4.0346	15395	13969	3176.11	0.40669	1.2551	229.01	3647.2	38705.8	38	0.474037	3905.68	0.0392159	0.030727	0.0712418	0.0143319	0.0228296	0.00930875	0.060374	0.0591401	0.0165325	0.0612724	0.066526	0.318879	湖南	0.196642	-0.411834	0.186143	0.830471	0.838244
湖南	2020	2.04159	1.64663	湖南	2020	41542.6	4240.7	15949.2	21352.7	0.117541	8.171	2.74172	12.3931	7.70269	湖南	3.3203	3.0228	3.4744	4.023	16585	14974	3192.9	0.27096	1.27488	223.73	4240.7	41647.5	39.6	0.531182	4063.13	0.0392159	0.030727	0.0712418	0.0143319	0.0228296	0.00930875	0.060374	0.0591401	0.0165325	0.0612724	0.066526	0.359266	湖南	0.0714756	-0.395278	0.638214	0.833293	0.830941
湖南	2021	2.1027	1.66953	湖南	2021	45713.5	4323	17852.5	23537.9	0.113988	8.355	2.87195	12.3964	7.82987	湖南	3.5367	3.2248	3.8336	4.0167	18295	16951	2875.06	0.32393	1.27378	219.06	4322.92	44979.3	39.7	0.536378	4244.92	0.0392159	0.030727	0.0712418	0.0143319	0.0228296	0.00930875	0.060374	0.0591401	0.0165325	0.0612724	0.066526	0.374504	湖南	-0.0326511	1.12789	0.762301	0.837237	0.937417
湖南	2022	2.08491	1.67279	湖南	2022	47558.6	4601.4	17899.8	25057.4	0.110708	8.373	3.11337	12.3984	7.85721	湖南	3.7562	3.4322	4.2003	4.015	19546	18078	2876	0.30513	1.2717	215.87	4601.4	47947.9	39.8	0.567232	4415.8	0.0392159	0.030727	0.0712418	0.0143319	0.0228296	0.00930875	0.060374	0.0591401	0.0165325	0.0612724	0.066526	0.391127	湖南	-0.128814	1.27689	0.992333	0.839592	0.960307
甘肃	2011	3.68966	1.35967	甘肃	2011	4816.9	525.6	2288.6	2002.7	0.132679	8.3461	0.624334	11.7256	5.78383	甘肃	0.1884	0.0499	0.1276	0.7561	4278	4273	1291.82	0.5619	1.76661	87.24	525.6	3965.79	39.8	0.14792	8096.76	0.0392159	0.030727	0.0712418	0.0143319	0.0228296	0.00930875	0.060374	0.0591401	0.0165325	0.0612724	0.066526	0.104693	甘肃	0.515207	1.05421	-1.37933	0.0402614	-0.775572
甘肃	2012	3.2451	1.40426	甘肃	2012	5393.1	590.9	2493.3	2308.9	0.146813	8.4059	0.714835	11.7845	5.93092	甘肃	0.7629	0.5472	0.6898	1.6079	4931	4834	1297.58	0.48067	1.65448	92.13	590.94	5145.03	39.5	0.166203	8244.68	0.0392159	0.030727	0.0712418	0.0143319	0.0228296	0.00930875	0.060374	0.0591401	0.0165325	0.0612724	0.066526	0.112578	甘肃	0.929496	1.54924	-1.29309	0.110239	-0.652423
甘肃	2013	3.06772	1.42377	甘肃	2013	6014.5	658.1	2674	2682.4	0.150059	8.024	0.817295	11.8026	6.05772	甘肃	1.2839	0.9677	1.142	2.586	5589	5654	1284.08	0.51087	1.56291	94.71	658.1	6527.9	40.5	0.184743	7388.78	0.0392159	0.030727	0.0712418	0.0143319	0.0228296	0.00930875	0.060374	0.0591401	0.0165325	0.0612724	0.066526	0.115877	甘肃	1.02465	-1.61215	-1.19547	0.131738	-0.546261
甘肃	2014	2.92324	1.43935	甘肃	2014	6518.4	695.8	2823.3	2999.4	0.144077	8.063	0.894842	11.8356	6.26454	甘肃	1.5976	1.481	1.0729	2.936	6277	6148	1297.06	0.49703	1.48321	97.6	695.77	7884.13	40.5	0.195904	7567.08	0.0392159	0.030727	0.0712418	0.0143319	0.0228296	0.00930875	0.060374	0.0591401	0.0165325	0.0612724	0.066526	0.121383	甘肃	0.849299	-1.28931	-1.12158	0.170981	-0.373107
甘肃	2015	3.08257	1.4353	甘肃	2015	6556.6	733.4	2505.4	3317.8	0.168018	8.165	0.985252	11.8498	6.3808	甘肃	1.9978	1.6967	1.2525	4.3464	6936	6830	1306.72	0.57704	1.40352	97.92	733.37	8754.23	41.2	0.207171	7702.23	0.0392159	0.030727	0.0712418	0.0143319	0.0228296	0.00930875	0.060374	0.0591401	0.0165325	0.0612724	0.066526	0.130268	甘肃	1.55106	-0.444946	-1.03543	0.187794	-0.275772
甘肃	2016	3.32548	1.44726	甘肃	2016	6907.9	800.8	2483.5	3623.7	0.154951	8.204	1.06183	11.8709	6.47466	甘肃	2.0411	1.8928	1.7266	3.1024	7457	7487	1317.51	0.60664	1.96922	93.42	800.75	9663.99	40.4	0.222581	7864.73	0.0392159	0.030727	0.0712418	0.0143319	0.0228296	0.00930875	0.060374	0.0591401	0.0165325	0.0612724	0.066526	0.141226	甘肃	1.16804	-0.122101	-0.962464	0.212865	-0.197189
甘肃	2017	4.19193	1.37032	甘肃	2017	7336.7	859.8	2515.8	3961.2	0.157603	8.234	1.19198	11.8654	6.54635	甘肃	2.4378	2.2738	2.4039	3.041	8076	8030	1331.43	0.48597	1.85874	84.49	859.75	5827.75	40.4	0.238804	8580.49	0.0392159	0.030727	0.0712418	0.0143319	0.0228296	0.00930875	0.060374	0.0591401	0.0165325	0.0612724	0.066526	0.153142	甘肃	1.24578	0.126241	-0.838454	0.20631	-0.137167
甘肃	2018	4.64616	1.34294	甘肃	2018	8104.1	926.1	2761.6	4416.4	0.179827	8.115	1.31139	11.8722	6.47713	甘肃	2.6682	2.6129	2.2752	3.5654	8804	9065	1337.54	0.68974	1.79454	83.17	926.05	5600.47	36.4	0.255012	9090.65	0.0392159	0.030727	0.0712418	0.0143319	0.0228296	0.00930875	0.060374	0.0591401	0.0165325	0.0612724	0.066526	0.165532	甘肃	1.89721	-0.858849	-0.724666	0.214433	-0.195126
甘肃	2019	4.50351	1.33375	甘肃	2019	8718.3	1059.3	2862.4	4796.6	0.181385	8.169	1.526	11.928	6.46925	甘肃	2.8914	2.8731	2.5174	3.6316	9629	9694	1328.86	0.50461	1.76244	80.88	1059.3	5970.1	40	0.286358	9574.74	0.0392159	0.030727	0.0712418	0.0143319	0.0228296	0.00930875	0.060374	0.0591401	0.0165325	0.0612724	0.066526	0.181391	甘肃	1.94286	-0.411834	-0.520185	0.28069	-0.20172
甘肃	2020	3.63302	1.34076	甘肃	2020	8979.7	1188.1	2824.8	4966.7	0.186345	8.171	1.75997	11.9573	6.46319	甘肃	3.055	3.0887	2.6535	3.6736	10344	9923	1338.6	0.35895	1.7173	80.36	1188.1	6435.77	40.9	0.312146	10100	0.0392159	0.030727	0.0712418	0.0143319	0.0228296	0.00930875	0.060374	0.0591401	0.0165325	0.0612724	0.066526	0.197709	甘肃	2.08826	-0.395278	-0.297238	0.315582	-0.206798
甘肃	2021	3.4996	1.31572	甘肃	2021	10225.5	1364.8	3451.2	5409.5	0.182772	8.355	2.09927	11.9613	6.59016	甘肃	3.2217	3.3044	2.7907	3.7171	11433	11206	1298.94	0.58638	1.67639	77.05	1364.8	7150.14	41.4	0.351881	10829.5	0.0392159	0.030727	0.0712418	0.0143319	0.0228296	0.00930875	0.060374	0.0591401	0.0165325	0.0612724	0.066526	0.20588	甘肃	1.98353	1.12789	0.0260567	0.32034	-0.100489
甘肃	2022	3.76957	1.28551	甘肃	2022	11121.4	1499.7	3928.3	5693.4	0.176528	8.373	2.34947	11.9655	6.55962	甘肃	3.3977	3.5265	2.9301	3.7669	12165	11494	1349.48	0.25661	1.61402	77.13	1499.7	7872.3	41.1	0.384373	11505.1	0.0392159	0.030727	0.0712418	0.0143319	0.0228296	0.00930875	0.060374	0.0591401	0.0165325	0.0612724	0.066526	0.221564	甘肃	1.80051	1.27689	0.264455	0.325338	-0.126065
福建	2011	2.15352	1.80794	福建	2011	17917.7	1492.2	9316.6	7109	0.0945737	8.3461	1.64957	11.433	6.4825	福建	0.6176	0.6328	0.6851	0.445	8952	8013	967.48	0.36289	1.5022	120.93	1492.21	9910.89	27.6	0.82178	1493.12	0.0392159	0.030727	0.0712418	0.0143319	0.0228296	0.00930875	0.060374	0.0591401	0.0165325	0.0612724	0.066526	0.153983	福建	-0.60173	1.05421	-0.402436	-0.307277	-0.190631
福建	2012	2.18287	1.82324	福建	2012	20190.7	1628.9	10527	8034.8	0.0936376	8.4059	1.81924	11.4581	6.54103	福建	1.2321	1.1274	1.4025	1.2679	10164	9068	968.51	0.54426	1.36869	120.87	1628.94	12439.9	27.3	0.95632	1485.39	0.0392159	0.030727	0.0712418	0.0143319	0.0228296	0.00930875	0.060374	0.0591401	0.0165325	0.0612724	0.066526	0.169789	福建	-0.629169	1.54924	-0.240769	-0.277554	-0.141625
福建	2013	2.184	1.8387	福建	2013	22503.8	1745.2	11805.5	8953.2	0.10174	8.024	2.00746	11.5083	6.70747	福建	1.831	1.5743	1.9412	2.4785	11405	9986	1122.42	0.5336	1.30237	120.57	1745.18	15327.4	28.7	1.0369	3260.96	0.0392159	0.030727	0.0712418	0.0143319	0.0228296	0.00930875	0.060374	0.0591401	0.0165325	0.0612724	0.066526	0.198195	福建	-0.39167	-1.61215	-0.0614244	-0.217908	-0.00227514
福建	2014	2.10181	1.85112	福建	2014	24942.1	1855.9	13165.1	9921.2	0.09687	8.063	2.16618	11.5248	6.83195	福建	2.0259	2.0422	1.6485	2.6576	12650	11056	1116.12	0.5731	1.22057	122.61	1855.85	18177.9	35.2	1.15	3388.34	0.0392159	0.030727	0.0712418	0.0143319	0.0228296	0.00930875	0.060374	0.0591401	0.0165325	0.0612724	0.066526	0.215582	福建	-0.534421	-1.28931	0.089816	-0.198318	0.101942
福建	2015	1.9993	1.86221	福建	2015	26819.5	1932.8	13735.7	11150.9	0.110421	8.165	2.32034	11.5578	6.96357	福建	2.4521	2.266	1.9823	3.9201	13793	11961	1061.65	0.56813	1.16837	123.8	1932.84	21301.4	35.9	1.23871	3399.27	0.0392159	0.030727	0.0712418	0.0143319	0.0228296	0.00930875	0.060374	0.0591401	0.0165325	0.0612724	0.066526	0.236223	福建	-0.137205	-0.444946	0.236704	-0.159115	0.212133
福建	2016	1.99943	1.86736	福建	2016	29609.4	2145.1	14683.7	12780.6	0.0960331	8.204	2.64632	11.5783	7.06715	福建	2.5267	2.4047	2.4512	3.067	14999	12911	1055.37	0.50091	1.2204	123.84	2145.1	23237.3	35.5	1.43401	3579.01	0.0392159	0.030727	0.0712418	0.0143319	0.0228296	0.00930875	0.060374	0.0591401	0.0165325	0.0612724	0.066526	0.253675	福建	-0.558951	-0.122101	0.547313	-0.134694	0.298853
福建	2017	1.90685	1.87729	福建	2017	33842.4	2215.1	16290	15337.3	0.0955776	8.234	2.83764	11.59	7.1452	福建	2.9928	2.754	3.3433	3.1447	16335	14003	1064.84	0.45217	1.25715	116.32	2215.13	26416.3	35.1	1.48089	3651.69	0.0392159	0.030727	0.0712418	0.0143319	0.0228296	0.00930875	0.060374	0.0591401	0.0165325	0.0612724	0.066526	0.272683	福建	-0.572302	0.126241	0.729611	-0.12081	0.364195
福建	2018	1.94965	1.8851	福建	2018	38687.8	2379	18847.8	17461	0.0892898	8.115	3.12142	11.5982	7.24566	福建	3.3444	3.1231	3.343	4.0776	17821	14943	1085.18	0.61499	1.28417	110.74	2379.02	29454.2	35.5	1.56234	3778.43	0.0392159	0.030727	0.0712418	0.0143319	0.0228296	0.00930875	0.060374	0.0591401	0.0165325	0.0612724	0.066526	0.295899	福建	-0.75661	-0.858849	1	-0.111074	0.448301
福建	2019	1.84864	1.89402	福建	2019	42326.6	2595.5	20065.5	19665.6	0.0870552	8.169	3.48876	11.6063	7.83597	福建	3.6051	3.4065	3.6373	4.2025	19568	16281	1076.78	0.4606	1.29212	106.26	2595.5	31191.9	38	1.68268	3895.94	0.0392159	0.030727	0.0712418	0.0143319	0.0228296	0.00930875	0.060374	0.0591401	0.0165325	0.0612724	0.066526	0.328818	福建	-0.822112	-0.411834	1.35002	-0.101469	0.942528
福建	2020	1.86142	1.88916	福建	2020	43608.6	2730.8	20168.4	20709.3	0.0862809	8.171	3.76916	11.6093	7.80294	福建	3.8013	3.5921	4.018	4.0982	20880	16339	1110.42	0.32312	1.29445	100.81	2730.8	31067.2	38.3	1.73595	4031.8	0.0392159	0.030727	0.0712418	0.0143319	0.0228296	0.00930875	0.060374	0.0591401	0.0165325	0.0612724	0.066526	0.324662	福建	-0.844805	-0.395278	1.6172	-0.0978704	0.914875
福建	2021	1.85789	1.90231	福建	2021	49566.1	2899.9	23319.8	23346.3	0.070438	8.355	4.09958	11.6176	7.90308	福建	4.0026	3.7876	4.4074	4.0027	23229	19290	825.77	0.35106	1.30015	96.63	2899.9	32931.2	38.8	1.82048	4146.54	0.0392159	0.030727	0.0712418	0.0143319	0.0228296	0.00930875	0.060374	0.0591401	0.0165325	0.0612724	0.066526	0.337752	福建	-1.30919	1.12789	1.93204	-0.0880612	0.998709
福建	2022	1.7799	1.90422	福建	2022	51765.1	3077.6	23125.3	25562.2	0.0721058	8.373	4.39853	11.6341	7.92277	福建	4.2096	3.9893	4.7974	3.9125	24987	20467	855.47	0.21246	1.29724	92.07	3077.6	35401.1	38.7	1.89752	4279.05	0.0392159	0.030727	0.0712418	0.0143319	0.0228296	0.00930875	0.060374	0.0591401	0.0165325	0.0612724	0.066526	0.360011	福建	-1.2603	1.27689	2.21689	-0.0684618	1.01519
西藏	2011	3.0041	1.35858	西藏	2011	611.5	69.8	195.6	346.1	0.166902	8.3461	0.458998	11.0526	3.68888	西藏	0.1622	0.0337	0.3016	0.3333	4886	3146	245.31	0.22472	0.511895	4.79	69.83	516.31	48	0.327794	42.3	0.0392159	0.030727	0.0712418	0.0143319	0.0228296	0.00930875	0.060374	0.0591401	0.0165325	0.0612724	0.066526	0.0430672	西藏	1.51834	1.05421	-1.53687	-0.759228	-2.5295
西藏	2012	2.85631	1.34253	西藏	2012	710.2	75.3	226.1	408.8	0.157532	8.4059	0.487738	11.0852	3.75887	西藏	0.6853	0.3286	0.7107	1.8165	5698	3406	251.04	0.47917	0.473685	4.99	75.25	670.52	47.1	0.350981	42.84	0.0392159	0.030727	0.0712418	0.0143319	0.0228296	0.00930875	0.060374	0.0591401	0.0165325	0.0612724	0.066526	0.0412831	西藏	1.24369	1.54924	-1.50948	-0.720522	-2.4709
西藏	2013	2.86845	1.34676	西藏	2013	828.2	81.2	270.8	476.2	0.146691	8.024	0.530087	11.1647	3.93378	西藏	1.151	0.7409	1.1284	2.5465	6553	4102	239.27	0.40271	0.436439	5.7	81.21	876	46.9	0.369402	725.99	0.0392159	0.030727	0.0712418	0.0143319	0.0228296	0.00930875	0.060374	0.0591401	0.0165325	0.0612724	0.066526	0.0476311	西藏	0.925918	-1.61215	-1.46913	-0.626108	-2.32446
西藏	2014	2.85781	1.35322	西藏	2014	939.7	88.1	310.3	541.3	0.142757	8.063	0.579013	11.2315	4.11904	西藏	1.4391	1.2667	1.0876	2.647	7359	4822	244.03	0.87597	0.397849	5.34	88.11	1069.23	48.6	0.398063	779.76	0.0392159	0.030727	0.0712418	0.0143319	0.0228296	0.00930875	0.060374	0.0591401	0.0165325	0.0612724	0.066526	0.044304	西藏	0.810614	-1.28931	-1.42251	-0.546712	-2.16937
西藏	2015	2.35069	1.34465	西藏	2015	1043	93.6	341.8	607.6	0.14497	8.165	0.636027	11.2689	4.27805	西藏	1.8638	1.3987	1.5775	3.9197	8244	5580	247.8	0.45763	0.370653	6.03	93.61	1295.68	44.6	0.418825	466.09	0.0392159	0.030727	0.0712418	0.0143319	0.0228296	0.00930875	0.060374	0.0591401	0.0165325	0.0612724	0.066526	0.0521228	西藏	0.875472	-0.444946	-1.36819	-0.502251	-2.03623
西藏	2016	2.34612	1.3495	西藏	2016	1173	110.5	390.4	672.1	0.153201	8.204	0.743254	11.3156	4.35671	西藏	2.0473	1.6721	2.0253	3.3266	9094	6070	251.53	0.75172	0.414318	5.91	110.52	1596.05	43.1	0.431693	323.27	0.0392159	0.030727	0.0712418	0.0143319	0.0228296	0.00930875	0.060374	0.0591401	0.0165325	0.0612724	0.066526	0.0508629	西藏	1.11674	-0.122101	-1.26602	-0.446738	-1.97038
西藏	2017	2.37116	1.34608	西藏	2017	1349	118.2	469.6	761.2	0.141557	8.234	0.765654	11.4002	4.44617	西藏	2.4557	2.0929	2.7379	3.141	10330	6691	261.23	0.75781	0.485672	5.53	118.15	1975.6	39.3	0.478252	419.11	0.0392159	0.030727	0.0712418	0.0143319	0.0228296	0.00930875	0.060374	0.0591401	0.0165325	0.0612724	0.066526	0.0546409	西藏	0.775429	0.126241	-1.24467	-0.346238	-1.89548
西藏	2018	2.49364	1.35268	西藏	2018	1548.4	128.3	582.7	837.3	0.185033	8.115	0.834486	11.4905	4.56643	西藏	2.7433	2.4982	2.6716	3.6833	11450	7452	264.53	0.82474	0.495401	5.19	128.34	2169.21	38.7	0.488941	528.5	0.0392159	0.030727	0.0712418	0.0143319	0.0228296	0.00930875	0.060374	0.0591401	0.0165325	0.0612724	0.066526	0.0611305	西藏	2.04978	-0.858849	-1.17909	-0.238982	-1.7948
西藏	2019	2.61039	1.36056	西藏	2019	1697.8	138.2	635.6	924	0.20341	8.169	0.900745	11.5517	4.77153	西藏	2.9379	2.7114	2.9321	3.6965	12951	8418	275.94	0.05455	0.485725	4.82	138.19	2121.49	43	0.523331	622.55	0.0392159	0.030727	0.0712418	0.0143319	0.0228296	0.00930875	0.060374	0.0591401	0.0165325	0.0612724	0.066526	0.0818057	西藏	2.58846	-0.411834	-1.11595	-0.166338	-1.62308
西藏	2020	2.27171	1.37105	西藏	2020	1902.7	150.3	714.9	1037.5	0.187904	8.171	0.995991	11.6805	4.87443	西藏	3.1053	2.9018	3.1938	3.6167	14598	8917	282.82	0.3913	0.471722	4.4	150.3	2236.05	44.1	0.56748	711.91	0.0392159	0.030727	0.0712418	0.0143319	0.0228296	0.00930875	0.060374	0.0591401	0.0165325	0.0612724	0.066526	0.0812111	西藏	2.13394	-0.395278	-1.0252	-0.0133488	-1.53693
西藏	2021	2.47931	1.3993	西藏	2021	2080.2	164.1	757.3	1158.8	0.168001	8.355	1.1006	11.6963	4.95653	西藏	3.2805	3.0923	3.458	3.5413	16932	10577	297.88	0.15493	0.460128	4.33	164.12	1918.53	42.9	0.614537	804.18	0.0392159	0.030727	0.0712418	0.0143319	0.0228296	0.00930875	0.060374	0.0591401	0.0165325	0.0612724	0.066526	0.0897297	西藏	1.55056	1.12789	-0.925517	0.00552949	-1.4682
西藏	2022	2.40836	1.37754	西藏	2022	2150.2	186.2	787.1	1176.8	0.143414	8.373	1.22202	11.7023	4.84103	西藏	3.4601	3.2881	3.7284	3.4681	18209	11139	304.63	0.41772	0.444238	2.83	186.2	1573.19	40.5	0.667292	898.47	0.0392159	0.030727	0.0712418	0.0143319	0.0228296	0.00930875	0.060374	0.0591401	0.0165325	0.0612724	0.066526	0.0891225	西藏	0.829872	1.27689	-0.809828	0.0126289	-1.5649
贵州	2011	2.13554	1.48198	贵州	2011	5615.6	699.6	2258.9	2657.1	0.123797	8.3461	0.508707	11.9692	5.74428	贵州	0.1847	0.0306	0.2751	0.5292	4499	3857	1201.19	0.53058	2.69963	94.08	699.56	4235.92	35.2	0.145435	3249.82	0.0392159	0.030727	0.0712418	0.0143319	0.0228296	0.00930875	0.060374	0.0591401	0.0165325	0.0612724	0.066526	0.0923097	贵州	0.254872	1.05421	-1.4895	0.329688	-0.808676
贵州	2012	2.41308	1.4592	贵州	2012	6742.2	862.7	2716.8	3162.8	0.131318	8.4059	0.629331	12.0109	5.88694	贵州	0.7587	0.4987	0.8992	1.3621	5159	4355	1214.57	0.40712	2.46886	98.17	862.69	5717.8	35.1	0.171639	3513.55	0.0392159	0.030727	0.0712418	0.0143319	0.0228296	0.00930875	0.060374	0.0591401	0.0165325	0.0612724	0.066526	0.103732	贵州	0.475308	1.54924	-1.37457	0.37924	-0.689244
贵州	2013	2.32705	1.49481	贵州	2013	7973.1	999.3	3171	3802.7	0.129859	8.024	0.737858	12.0585	6.02102	贵州	1.2122	0.8959	1.2546	2.1793	5898	5291	926.9	0.55275	2.40482	97.42	999.34	7373.6	34.4	0.191622	5816.53	0.0392159	0.030727	0.0712418	0.0143319	0.0228296	0.00930875	0.060374	0.0591401	0.0165325	0.0612724	0.066526	0.115974	贵州	0.432536	-1.61215	-1.27116	0.435791	-0.576985
贵州	2014	2.57885	1.49054	贵州	2014	9173.1	1281.5	3582.4	4309.3	0.126225	8.063	0.964908	12.0956	6.23754	贵州	1.5462	1.399	1.1408	2.769	6671	5970	981.83	0.55928	2.2415	101.29	1281.52	9025.75	35.3	0.239035	6021.33	0.0392159	0.030727	0.0712418	0.0143319	0.0228296	0.00930875	0.060374	0.0591401	0.0165325	0.0612724	0.066526	0.127987	贵州	0.326028	-1.28931	-1.05481	0.479816	-0.39571
贵州	2015	2.79659	1.48039	贵州	2015	10541	1642	4026.7	4872.3	0.135616	8.165	1.29592	12.1357	6.38249	贵州	1.9329	1.6098	1.3274	4.1001	7387	6645	1065.43	0.5254	2.14857	103.69	1641.98	10945.5	35.4	0.309783	6297.78	0.0392159	0.030727	0.0712418	0.0143319	0.0228296	0.00930875	0.060374	0.0591401	0.0165325	0.0612724	0.066526	0.145751	贵州	0.6013	-0.444946	-0.739407	0.527461	-0.274355
贵州	2016	2.66486	1.49715	贵州	2016	11792.4	1861.8	4468.7	5461.8	0.14766	8.204	1.52656	12.1633	6.51959	贵州	2.0945	1.807	1.827	3.5303	8090	7533	1088.07	0.51497	2.74602	103.67	1861.81	13204	36.5	0.349682	6556.46	0.0392159	0.030727	0.0712418	0.0143319	0.0228296	0.00930875	0.060374	0.0591401	0.0165325	0.0612724	0.066526	0.165098	贵州	0.954325	-0.122101	-0.519646	0.560265	-0.159575
贵州	2017	2.90838	1.48158	贵州	2017	13605.4	2032.3	4970.9	6602.3	0.132693	8.234	1.71837	12.1776	6.64053	贵州	2.5146	2.2777	2.5844	3.1699	8869	8299	1114.12	0.57276	2.59434	95.65	2032.27	15503.9	36.3	0.378134	6814.62	0.0392159	0.030727	0.0712418	0.0143319	0.0228296	0.00930875	0.060374	0.0591401	0.0165325	0.0612724	0.066526	0.175881	贵州	0.515622	0.126241	-0.336885	0.577211	-0.0583221
贵州	2018	2.98383	1.47866	贵州	2018	15353.2	2156	5506.2	7691	0.132183	8.115	1.87678	12.1905	6.19522	贵州	2.7691	2.6739	2.4133	3.7301	9716	9170	1132.24	0.61227	2.30457	89.48	2156.02	17953.5	30.5	0.414996	7052.95	0.0392159	0.030727	0.0712418	0.0143319	0.0228296	0.00930875	0.060374	0.0591401	0.0165325	0.0612724	0.066526	0.186595	贵州	0.500678	-0.858849	-0.185941	0.592568	-0.431143
贵州	2019	2.85095	1.47474	贵州	2019	16769.3	2280.6	5971.5	8517.3	0.167918	8.169	2.08296	12.2294	6.7567	贵州	2.9351	2.9266	2.4566	3.833	10756	10222	1153.99	0.31064	2.20621	83.18	2280.56	18115.1	38.2	0.439291	7321.37	0.0392159	0.030727	0.0712418	0.0143319	0.0228296	0.00930875	0.060374	0.0591401	0.0165325	0.0612724	0.066526	0.213317	贵州	1.54812	-0.411834	0.0105161	0.638805	0.0389382
贵州	2020	2.63159	1.46337	贵州	2020	17860.4	2539.9	6263	9057.5	0.178467	8.171	2.41145	12.239	6.85277	贵州	3.0794	3.1324	2.582	3.8081	11642	10818	1165.49	0.43359	2.12029	78.78	2539.88	18694.7	39.7	0.488663	7577	0.0392159	0.030727	0.0712418	0.0143319	0.0228296	0.00930875	0.060374	0.0591401	0.0165325	0.0612724	0.066526	0.229927	贵州	1.85733	-0.395278	0.323514	0.650183	0.119371
贵州	2021	2.65855	1.41384	贵州	2021	19458.6	2730.9	6850.5	9877.2	0.130722	8.355	2.66709	12.2414	7.02296	贵州	3.226	3.3408	2.713	3.7869	12856	12557	1270.21	0.43711	2.00446	75.98	2730.92	18115.2	40.4	0.530659	7899.87	0.0392159	0.030727	0.0712418	0.0143319	0.0228296	0.00930875	0.060374	0.0591401	0.0165325	0.0612724	0.066526	0.240876	贵州	0.457857	1.12789	0.567101	0.653036	0.261854
贵州	2022	2.95515	1.35536	贵州	2022	20010.4	2862.3	7052.7	10095.4	0.118289	8.373	2.81784	12.253	7.00878	贵州	3.3801	3.5506	2.8523	3.7661	13707	13172	1185.17	0.4598	1.91019	75.41	2862.3	17191.3	40.7	0.563565	8223.38	0.0392159	0.030727	0.0712418	0.0143319	0.0228296	0.00930875	0.060374	0.0591401	0.0165325	0.0612724	0.066526	0.24468	贵州	0.0934011	1.27689	0.710739	0.66687	0.249982
辽宁	2011	1.59063	1.71988	辽宁	2011	16354.9	1693.4	8478.7	6182.9	0.0842838	8.3461	2.12436	11.5524	6.32382	辽宁	0.4329	0.4496	0.4464	0.3533	8011	5311	1588.38	0.3845	1.66571	144.64	1693.37	17726.3	19.1	0.441097	6486.51	0.0392159	0.030727	0.0712418	0.0143319	0.0228296	0.00930875	0.060374	0.0591401	0.0165325	0.0612724	0.066526	0.18023	辽宁	-0.903344	1.05421	0.0499686	-0.165481	-0.323476
辽宁	2012	1.48265	1.74459	辽宁	2012	17848.6	1869.3	8886.9	7092.4	0.0888477	8.4059	2.44812	11.5671	6.66096	辽宁	1.0353	0.8901	1.2036	1.2091	9061	5892	1698.82	0.79572	1.62079	146.9	1869.28	21836.3	20.2	0.476566	6678.1	0.0392159	0.030727	0.0712418	0.0143319	0.0228296	0.00930875	0.060374	0.0591401	0.0165325	0.0612724	0.066526	0.190235	辽宁	-0.769571	1.54924	0.358461	-0.148068	-0.0412177
辽宁	2013	1.56217	1.75324	辽宁	2013	19208.8	1973.4	9204.2	8031.2	0.0897599	8.024	2.64952	11.617	6.79727	辽宁	1.6007	1.2667	1.8154	2.3133	10161	7032	1407.84	0.60222	1.57844	151.76	1973.42	25107.7	20.9	0.49764	4520.39	0.0392159	0.030727	0.0712418	0.0143319	0.0228296	0.00930875	0.060374	0.0591401	0.0165325	0.0612724	0.066526	0.19465	辽宁	-0.74283	-1.61215	0.550355	-0.0886825	0.0729048
辽宁	2014	1.59196	1.73263	辽宁	2014	20025.7	2002	9038.8	8984.9	0.0873636	8.063	2.75027	11.6564	6.96319	辽宁	1.8761	1.7549	1.6289	2.7253	11191	7801	1473.97	0.68287	1.54559	151.55	2001.95	24730.8	20.9	0.498791	4733.48	0.0392159	0.030727	0.0712418	0.0143319	0.0228296	0.00930875	0.060374	0.0591401	0.0165325	0.0612724	0.066526	0.200758	辽宁	-0.81307	-1.28931	0.646361	-0.041902	0.211816
辽宁	2015	1.8915	1.64007	辽宁	2015	20210.3	2053.7	8344.6	9811.9	0.0995334	8.165	2.92755	11.6983	7.08891	辽宁	2.264	1.9417	1.7841	4.2006	12057	8873	1520.31	0.65626	1.54076	152.09	2053.71	17917.9	21.1	0.497755	4857.83	0.0392159	0.030727	0.0712418	0.0143319	0.0228296	0.00930875	0.060374	0.0591401	0.0165325	0.0612724	0.066526	0.206103	辽宁	-0.456351	-0.444946	0.815284	0.00783181	0.317071
辽宁	2016	2.4449	1.5175	辽宁	2016	20392.5	1841.2	7865.7	10685.6	0.105021	8.204	2.79442	11.7003	7.17143	辽宁	2.3141	2.0774	2.2006	3.3021	12881	9953	1572.99	0.21086	1.95657	148.06	1841.21	6692.25	20.9	0.45862	5024.22	0.0392159	0.030727	0.0712418	0.0143319	0.0228296	0.00930875	0.060374	0.0591401	0.0165325	0.0612724	0.066526	0.213596	辽宁	-0.295503	-0.122101	0.688432	0.0102767	0.386155
辽宁	2017	2.6664	1.50448	辽宁	2017	21693	1902.3	8328.9	11461.8	0.0941157	8.234	2.92676	11.7175	7.24022	辽宁	2.6718	2.3987	2.9127	3.1357	13747	10787	1610.55	0.3076	1.88355	145.47	1902.28	6676.74	20.7	0.479445	5217.84	0.0392159	0.030727	0.0712418	0.0143319	0.0228296	0.00930875	0.060374	0.0591401	0.0165325	0.0612724	0.066526	0.219203	辽宁	-0.615155	0.126241	0.81453	0.0307053	0.44375
辽宁	2018	2.82068	1.52384	辽宁	2018	23510.5	2020.6	9049	12441	0.0865051	8.115	3.18333	11.7197	7.4767	辽宁	2.9095	2.7181	2.7948	3.7501	14656	11455	1619.33	0.31711	1.87506	145.02	2020.56	6923.78	23.3	0.501437	5394.54	0.0392159	0.030727	0.0712418	0.0143319	0.0228296	0.00930875	0.060374	0.0591401	0.0165325	0.0612724	0.066526	0.209183	辽宁	-0.838235	-0.858849	1.059	0.033307	0.641736
辽宁	2019	2.93396	1.53792	辽宁	2019	24855.3	2178	9475.9	13201.4	0.0874782	8.169	3.54854	11.7342	7.01661	辽宁	3.1101	2.9244	3.0252	3.8777	16108	12030	1629.18	0.23961	1.79155	139.91	2177.97	6944.55	27.1	0.53755	5553.41	0.0392159	0.030727	0.0712418	0.0143319	0.0228296	0.00930875	0.060374	0.0591401	0.0165325	0.0612724	0.066526	0.206705	辽宁	-0.809712	-0.411834	1.40698	0.0505031	0.25654
辽宁	2020	2.61068	1.56796	辽宁	2020	25011.4	2284.8	9357.5	13369.1	0.0839401	8.171	3.86714	11.7822	7.1863	辽宁	3.2629	3.0711	3.2812	3.8633	17450	12311	1632.54	0.68521	1.73506	137.57	2284.8	7125.11	37	0.552804	5723.58	0.0392159	0.030727	0.0712418	0.0143319	0.0228296	0.00930875	0.060374	0.0591401	0.0165325	0.0612724	0.066526	0.208031	辽宁	-0.91342	-0.395278	1.71056	0.1075	0.398604
辽宁	2021	2.72631	1.60539	辽宁	2021	27569.5	2461.9	10883.3	14224.2	0.069642	8.355	4.28498	11.7874	7.29091	辽宁	3.422	3.2213	3.5419	3.8527	19217	14606	1693.05	0.36451	1.69589	135.03	2461.9	7310.36	37	0.588343	5936.1	0.0392159	0.030727	0.0712418	0.0143319	0.0228296	0.00930875	0.060374	0.0591401	0.0165325	0.0612724	0.066526	0.230503	辽宁	-1.33252	1.12789	2.1087	0.113737	0.486187
辽宁	2022	2.79279	1.61386	辽宁	2022	28826.1	2598	11363.6	14864.5	0.0739991	8.373	4.57196	11.7834	7.27268	辽宁	3.5826	3.3801	3.8032	3.8479	19908	14326	1716.63	0.41711	1.62796	130.51	2597.6	7573.53	37.2	0.620727	6144.1	0.0392159	0.030727	0.0712418	0.0143319	0.0228296	0.00930875	0.060374	0.0591401	0.0165325	0.0612724	0.066526	0.233456	辽宁	-1.20481	1.27689	2.38215	0.109007	0.470924
重庆	2011	2.12211	1.5827	重庆	2011	10161.2	794.1	4571.3	4795.8	0.0773897	8.3461	0.908306	11.6832	5.13991	重庆	0.4189	0.4038	0.4746	0.3677	6605	5414	692.88	0.34375	2.82889	95.58	794.14	7473.38	33.1	0.249645	2376.69	0.0392159	0.030727	0.0712418	0.0143319	0.0228296	0.00930875	0.060374	0.0591401	0.0165325	0.0612724	0.066526	0.106142	重庆	-1.10542	1.05421	-1.10875	-0.0100985	-1.31467
重庆	2012	2.08601	1.6192	重庆	2012	11595.4	879.7	5308.1	5407.6	0.0841496	8.4059	1.02914	11.7013	5.27658	重庆	1.0002	0.8539	1.1614	1.1905	7526	6035	702.97	0.55254	2.85741	96.02	879.67	8736.17	33	0.26874	2439.97	0.0392159	0.030727	0.0712418	0.0143319	0.0228296	0.00930875	0.060374	0.0591401	0.0165325	0.0612724	0.066526	0.112674	重庆	-0.907279	1.54924	-0.993613	0.0114088	-1.20024
重庆	2013	2.07008	1.65414	重庆	2013	13027.6	941.2	5988.6	6097.7	0.0920687	8.024	1.12941	11.7187	5.41477	重庆	1.5986	1.2527	1.782	2.4074	8493	6971	675.18	0.36987	2.76799	96.64	941.24	10435.2	33	0.287872	2576.14	0.0392159	0.030727	0.0712418	0.0143319	0.0228296	0.00930875	0.060374	0.0591401	0.0165325	0.0612724	0.066526	0.123967	重庆	-0.675157	-1.61215	-0.898067	0.0320703	-1.08456
重庆	2014	2.05535	1.68398	重庆	2014	14623.8	990.8	6774.6	6858.5	0.0882523	8.063	1.21272	11.755	5.64509	重庆	1.8471	1.7557	1.5788	2.6363	9490	7983	677.26	0.57494	2.64496	97.26	990.75	12285.4	33.6	0.306029	2908.69	0.0392159	0.030727	0.0712418	0.0143319	0.0228296	0.00930875	0.060374	0.0591401	0.0165325	0.0612724	0.066526	0.128899	重庆	-0.787022	-1.28931	-0.818684	0.0752381	-0.891721
重庆	2015	2.08492	1.70223	重庆	2015	16040.5	1067.7	7208	7764.8	0.087376	8.165	1.36045	11.8533	5.76331	重庆	2.2184	1.9746	1.7158	3.9365	10505	8938	687.19	0.59463	2.5477	97.72	1067.72	14353.2	33.6	0.328026	3069.96	0.0392159	0.030727	0.0712418	0.0143319	0.0228296	0.00930875	0.060374	0.0591401	0.0165325	0.0612724	0.066526	0.14122	重庆	-0.812706	-0.444946	-0.67792	0.192019	-0.792749
重庆	2016	2.11388	1.70556	重庆	2016	18023	1237	7765.4	9020.7	0.0869581	8.204	1.62383	11.87	5.90154	重庆	2.3389	2.1403	2.1154	3.401	11549	9954	690.6	0.6271	2.52764	96.14	1236.98	16048.1	33.6	0.377546	3233.87	0.0392159	0.030727	0.0712418	0.0143319	0.0228296	0.00930875	0.060374	0.0591401	0.0165325	0.0612724	0.066526	0.154532	重庆	-0.824955	-0.122101	-0.426967	0.211884	-0.677019
重庆	2017	2.14121	1.68756	重庆	2017	20066.3	1276.1	8455	10335.2	0.080154	8.234	1.72892	11.9042	6.03189	重庆	2.7631	2.495	3.0121	3.1957	12638	10936	694.26	0.35346	2.46899	95.46	1276.09	17537	33.7	0.389363	3397.39	0.0392159	0.030727	0.0712418	0.0143319	0.0228296	0.00930875	0.060374	0.0591401	0.0165325	0.0612724	0.066526	0.169631	重庆	-1.0244	0.126241	-0.326828	0.252413	-0.56789
重庆	2018	2.18127	1.68287	重庆	2018	21588.8	1378.7	8842.2	11367.9	0.0807694	8.115	1.94296	11.9671	6.04358	重庆	3.0153	2.8511	2.856	3.8474	13781	11977	696.94	0.6488	2.34468	93.17	1378.68	18764.6	33.7	0.419712	3580.06	0.0392159	0.030727	0.0712418	0.0143319	0.0228296	0.00930875	0.060374	0.0591401	0.0165325	0.0612724	0.066526	0.175061	重庆	-1.00636	-0.858849	-0.122879	0.327149	-0.558098
重庆	2019	2.21084	1.66835	重庆	2019	23605.8	1551.6	9392	12662.2	0.0803539	8.169	2.3087	12.0684	7.34575	重庆	3.2547	3.1103	3.1036	4.0062	15133	13112	697.68	0.33844	2.2843	91.08	1551.6	19815.5	36.5	0.472631	3722.49	0.0392159	0.030727	0.0712418	0.0143319	0.0228296	0.00930875	0.060374	0.0591401	0.0165325	0.0612724	0.066526	0.193508	重庆	-1.01854	-0.411834	0.225609	0.447573	0.532104
重庆	2020	2.18985	1.6422	重庆	2020	25041.4	1803.5	9969.6	13268.3	0.0851582	8.171	2.80558	12.1051	7.38225	重庆	3.4476	3.2939	3.4391	3.9712	16361	14140	698.32	0.29716	2.25138	89.83	1803.5	20588.3	37.7	0.544693	3856	0.0392159	0.030727	0.0712418	0.0143319	0.0228296	0.00930875	0.060374	0.0591401	0.0165325	0.0612724	0.066526	0.208963	重庆	-0.877715	-0.395278	0.699064	0.491153	0.56266
重庆	2021	2.3113	1.66496	重庆	2021	28077.3	1921.9	11217.3	14938.1	0.0840238	8.355	3.07946	12.1233	7.5911	重庆	3.6494	3.4813	3.7807	3.9418	18100	16096	665.27	0.46477	2.22471	89.05	1921.91	21844.2	38.8	0.575873	3947.31	0.0392159	0.030727	0.0712418	0.0143319	0.0228296	0.00930875	0.060374	0.0591401	0.0165325	0.0612724	0.066526	0.225689	重庆	-0.910967	1.12789	0.960027	0.512706	0.737518
重庆	2022	2.43684	1.6758	重庆	2022	28576.1	2012.6	11047.4	15516.1	0.0804963	8.373	3.28873	12.1342	7.60882	重庆	3.8567	3.6776	4.1254	3.9176	19313	16727	669.87	0.34641	2.22216	88.74	2012.6	21997.1	39.3	0.591718	4109.04	0.0392159	0.030727	0.0712418	0.0143319	0.0228296	0.00930875	0.060374	0.0591401	0.0165325	0.0612724	0.066526	0.234956	重庆	-1.01436	1.27689	1.15943	0.525739	0.752351
陕西	2011	3.09052	1.47748	陕西	2011	12175.1	1187.4	6484.3	4503.4	0.11389	8.3461	1.04129	11.9315	6.09762	陕西	0.4096	0.3781	0.2974	0.7174	5484	5091	1274.34	0.38348	1.92116	207.27	1187.39	9431.08	36.1	0.295093	9407.09	0.0392159	0.030727	0.0712418	0.0143319	0.0228296	0.00930875	0.060374	0.0591401	0.0165325	0.0612724	0.066526	0.155299	陕西	-0.0355333	1.05421	-0.982032	0.284941	-0.512852
陕西	2012	1.50957	1.49437	陕西	2012	14142.4	1314.8	7612.3	5215.3	0.113259	8.4059	1.213	11.9917	6.25556	陕西	0.9824	0.8362	0.9861	1.4588	6285	5797	1277.18	0.36903	1.7798	239.8	1314.84	12044.5	32.6	0.328126	9512.32	0.0392159	0.030727	0.0712418	0.0143319	0.0228296	0.00930875	0.060374	0.0591401	0.0165325	0.0612724	0.066526	0.16523	陕西	-0.054032	1.54924	-0.818422	0.356417	-0.380628
陕西	2013	1.53309	1.52311	陕西	2013	15905.4	1463.5	8418	6023.9	0.114492	8.024	1.3951	12.0152	6.38873	陕西	1.4837	1.236	1.4594	2.3455	7092	6488	1209.94	0.47541	1.67496	241.73	1463.49	14884.1	32.3	0.372083	6784.91	0.0392159	0.030727	0.0712418	0.0143319	0.0228296	0.00930875	0.060374	0.0591401	0.0165325	0.0612724	0.066526	0.161213	陕西	-0.0178979	-1.61215	-0.644905	0.384334	-0.269134
陕西	2014	1.56799	1.54574	陕西	2014	17402.5	1566.9	9045	6790.6	0.112548	8.063	1.52869	12.0266	6.52956	陕西	1.7873	1.7325	1.39	2.69	7932	7252	1226.49	0.56281	1.58843	230.19	1566.85	17191.9	33.7	0.404009	7039.06	0.0392159	0.030727	0.0712418	0.0143319	0.0228296	0.00930875	0.060374	0.0591401	0.0165325	0.0612724	0.066526	0.169857	陕西	-0.0748812	-1.28931	-0.517614	0.397887	-0.151224
陕西	2015	1.57705	1.58177	陕西	2015	17898.8	1599.7	8664.6	7634.5	0.118961	8.165	1.62065	12.044	6.66339	陕西	2.1612	1.9492	1.5795	3.9185	8689	7901	1236.77	0.62448	1.51841	231.95	1599.74	18582.2	34.7	0.413728	7288.32	0.0392159	0.030727	0.0712418	0.0143319	0.0228296	0.00930875	0.060374	0.0591401	0.0165325	0.0612724	0.066526	0.180026	陕西	0.113103	-0.444946	-0.429989	0.41849	-0.0391842
陕西	2016	1.67146	1.61063	陕西	2016	19045.8	1696.1	8906.5	8443.2	0.123776	8.204	1.77314	12.058	6.77685	陕西	2.2937	2.1117	2.0287	3.376	9396	8568	1251.39	0.57608	1.91543	233.05	1696.1	20825.2	33.7	0.427605	7571.21	0.0392159	0.030727	0.0712418	0.0143319	0.0228296	0.00930875	0.060374	0.0591401	0.0165325	0.0612724	0.066526	0.19989	陕西	0.254252	-0.122101	-0.284696	0.43515	0.0558075
陕西	2017	1.71809	1.63547	陕西	2017	21473.5	1741.1	10114.1	9618.3	0.112845	8.234	1.88004	12.0691	6.87296	陕西	2.6685	2.4648	2.76	3.1747	10265	9306	1263.09	0.47965	1.8122	232.15	1741.07	23819.4	35.3	0.450456	7765.02	0.0392159	0.030727	0.0712418	0.0143319	0.0228296	0.00930875	0.060374	0.0591401	0.0165325	0.0612724	0.066526	0.212349	陕西	-0.0661727	0.126241	-0.182838	0.44833	0.136271
陕西	2018	1.73191	1.63745	陕西	2018	23941.9	1830.2	11215.3	10896.4	0.118208	8.115	2.04287	12.0846	6.97747	陕西	2.9595	2.8105	2.7715	3.7931	11213	10071	1274.99	0.72202	1.76963	229.64	1830.19	26296.6	35.5	0.471228	7917.95	0.0392159	0.030727	0.0712418	0.0143319	0.0228296	0.00930875	0.060374	0.0591401	0.0165325	0.0612724	0.066526	0.223088	陕西	0.0910298	-0.858849	-0.0276842	0.466803	0.22377
陕西	2019	1.90038	1.63332	陕西	2019	25793.2	1991.1	11779.5	12022.6	0.119643	8.169	2.31618	12.1011	7.02367	陕西	3.2289	3.0821	3.0914	3.9636	12326	10935	1285.16	0.33995	1.7723	202.52	1991.1	26954	37	0.507782	8039.84	0.0392159	0.030727	0.0712418	0.0143319	0.0228296	0.00930875	0.060374	0.0591401	0.0165325	0.0612724	0.066526	0.243114	陕西	0.133092	-0.411834	0.232735	0.486373	0.262451
陕西	2020	2.49013	1.56411	陕西	2020	26014.1	2267.7	11222	12524.4	0.125162	8.171	2.74689	12.1044	6.96819	陕西	3.4204	3.2953	3.3173	4.0211	13316	11376	1336.81	0.48506	1.74243	201.91	2267.7	28059.1	37.8	0.572431	8163.74	0.0392159	0.030727	0.0712418	0.0143319	0.0228296	0.00930875	0.060374	0.0591401	0.0165325	0.0612724	0.066526	0.25863	陕西	0.294865	-0.395278	0.64314	0.490259	0.216003
陕西	2021	2.55844	1.57081	陕西	2021	30121.7	2409.9	14019	13692.9	0.11439	8.355	2.99961	12.1195	7.13306	陕西	3.6125	3.5085	3.5508	4.084	14745	13158	1192.47	0.32532	1.72312	200.7	2409.9	27217.4	38.1	0.604521	8350.48	0.0392159	0.030727	0.0712418	0.0143319	0.0228296	0.00930875	0.060374	0.0591401	0.0165325	0.0612724	0.066526	0.270556	陕西	-0.0208686	1.12789	0.883942	0.508232	0.354031
陕西	2022	2.73223	1.56155	陕西	2022	32838.2	2575	15937.2	14326	0.108447	8.373	3.23169	12.1314	7.19316	陕西	3.8076	3.7267	3.7901	4.1513	15704	14094	1161.63	0.32044	1.70268	194.16	2575.34	29422	39.3	0.643507	8624.42	0.0392159	0.030727	0.0712418	0.0143319	0.0228296	0.00930875	0.060374	0.0591401	0.0165325	0.0612724	0.066526	0.292235	陕西	-0.195069	1.27689	1.10508	0.522352	0.404351
青海	2011	2.47884	1.31081	青海	2011	1370.4	152.6	553.1	664.6	0.108262	8.3461	0.759276	11.071	3.97029	青海	0.1833	0.0196	0.0676	0.9342	4806	5619	251.67	0.14816	1.25392	8.27	152.62	1435.58	32.3	0.287196	840.82	0.0392159	0.030727	0.0712418	0.0143319	0.0228296	0.00930875	0.060374	0.0591401	0.0165325	0.0612724	0.066526	0.0511564	青海	-0.200508	1.05421	-1.25075	-0.737368	-2.2939
青海	2012	2.32723	1.41822	青海	2012	1528.5	174.2	620.2	734.1	0.115879	8.4059	0.885436	11.0972	4.08766	青海	0.6147	0.4712	0.5185	1.263	5594	6613	251.67	0.56359	1.27408	9.3	174.24	1883.42	30.6	0.319193	856.5	0.0392159	0.030727	0.0712418	0.0143319	0.0228296	0.00930875	0.060374	0.0591401	0.0165325	0.0612724	0.066526	0.0490997	青海	0.0227784	1.54924	-1.13054	-0.706214	-2.19564
青海	2013	2.27783	1.36361	青海	2013	1713.3	204.7	681	827.6	0.130035	8.024	1.07	11.1579	4.27388	青海	1.1801	0.8818	1.1342	2.2482	6462	7506	186.9	0.35105	1.35362	9.8	204.72	2361.1	35.9	0.373536	794.41	0.0392159	0.030727	0.0712418	0.0143319	0.0228296	0.00930875	0.060374	0.0591401	0.0165325	0.0612724	0.066526	0.0590444	青海	0.437718	-1.61215	-0.954677	-0.634112	-2.03972
青海	2014	2.27391	1.41176	青海	2014	1847.7	215.9	714.8	917	0.141039	8.063	1.15721	11.1941	4.39692	青海	1.4593	1.3924	1.084	2.3623	7283	8235	182.49	0.4523	1.25584	9.74	215.93	2861.23	37.5	0.395521	863.32	0.0392159	0.030727	0.0712418	0.0143319	0.0228296	0.00930875	0.060374	0.0591401	0.0165325	0.0612724	0.066526	0.0617892	青海	0.760249	-1.28931	-0.871581	-0.591086	-1.93672
青海	2015	2.22457	1.47097	青海	2015	2011	208.9	761.1	1041	0.13491	8.165	1.14434	11.2331	4.50866	青海	1.9515	1.5959	1.365	4.1914	7933	8566	196.99	0.7424	1.23029	10.13	208.93	3210.63	37.8	0.380021	898.7	0.0392159	0.030727	0.0712418	0.0143319	0.0228296	0.00930875	0.060374	0.0591401	0.0165325	0.0612724	0.066526	0.0594698	青海	0.580596	-0.444946	-0.883846	-0.544778	-1.84317
青海	2016	2.32251	1.50493	青海	2016	2258.2	221.2	867.7	1169.3	0.152381	8.204	1.25481	11.2719	4.61512	青海	2.0038	1.7773	1.8226	3.0811	8664	9222	202.35	0.8144	1.21631	8.76	221.19	3528.05	37.7	0.402869	1014.42	0.0392159	0.030727	0.0712418	0.0143319	0.0228296	0.00930875	0.060374	0.0591401	0.0165325	0.0612724	0.066526	0.0628777	青海	1.0927	-0.122101	-0.778578	-0.498663	-1.75403
青海	2017	2.48667	1.43757	青海	2017	2465.1	238.4	975.7	1251	0.152322	8.234	1.39502	11.3009	4.70863	青海	2.402	2.1567	2.5109	3.0142	9462	9903	206.61	0.58994	1.20106	8.67	238.41	3883.55	49.1	0.435793	1134.06	0.0392159	0.030727	0.0712418	0.0143319	0.0228296	0.00930875	0.060374	0.0591401	0.0165325	0.0612724	0.066526	0.0740676	青海	1.09098	0.126241	-0.644985	-0.464244	-1.67575
青海	2018	2.14716	1.51515	青海	2018	2748	268.1	1093.7	1386.2	0.162587	8.115	1.61725	11.3161	5.11379	青海	2.6312	2.5169	2.3531	3.5143	10393	10352	214.04	0.82081	1.18039	8.32	268.1	4167.05	50.4	0.488111	1251.66	0.0392159	0.030727	0.0712418	0.0143319	0.0228296	0.00930875	0.060374	0.0591401	0.0165325	0.0612724	0.066526	0.0777868	青海	1.39185	-0.858849	-0.433232	-0.446144	-1.33654
青海	2019	2.14731	1.38152	青海	2019	2941.1	301.9	1153.9	1485.3	0.173899	8.169	1.86975	11.3357	5.14982	青海	2.8265	2.729	2.5275	3.6919	11499	11343	213.33	0.36415	1.14311	6.19	301.9	4375.4	46.8	0.552806	1408.13	0.0392159	0.030727	0.0712418	0.0143319	0.0228296	0.00930875	0.060374	0.0591401	0.0165325	0.0612724	0.066526	0.0919142	青海	1.72343	-0.411834	-0.192637	-0.422891	-1.30638
青海	2020	1.67242	1.35317	青海	2020	3009.8	338	1143.2	1528.6	0.144761	8.171	2.13966	11.3519	5.08016	青海	2.9823	2.9206	2.6467	3.7958	12342	12134	219.25	0.2993	1.16282	5.45	338	3841.6	47.5	0.599034	1607.76	0.0392159	0.030727	0.0712418	0.0143319	0.0228296	0.00930875	0.060374	0.0591401	0.0165325	0.0612724	0.066526	0.097267	青海	0.869353	-0.395278	0.0645449	-0.40361	-1.36469
青海	2021	1.45738	1.29651	青海	2021	3385.1	353.6	1364.7	1666.7	0.135372	8.355	2.28307	11.3639	5.16992	青海	3.1388	3.1122	2.7712	3.9086	13604	13300	217.75	0.60802	1.18355	4.89	353.6	3730.2	47.8	0.613493	1702.2	0.0392159	0.030727	0.0712418	0.0143319	0.0228296	0.00930875	0.060374	0.0591401	0.0165325	0.0612724	0.066526	0.0964629	青海	0.594141	1.12789	0.201187	-0.38945	-1.28955
青海	2022	1.50261	1.25072	青海	2022	3623.3	379.2	1591	1653	0.139299	8.373	2.47253	11.382	5.05369	青海	3.3035	3.3071	2.8975	4.0218	14456	12516	222.01	0.31432	1.16476	4.71	379.2	3446.7	47.5	0.656784	1865.57	0.0392159	0.030727	0.0712418	0.0143319	0.0228296	0.00930875	0.060374	0.0591401	0.0165325	0.0612724	0.066526	0.105405	青海	0.709258	1.27689	0.381719	-0.36794	-1.38685
黑龙江	2011	1.87015	1.49855	黑龙	2011	9935	1695.5	4916.3	3323.2	0.127405	8.3461	1.88576	11.955	6.27514	黑龙江	0.3358	0.2112	0.3628	0.6983	7382	5630	4332.65	0.4441	3.35532	228.44	1695.5	7475.38	28.8	0.125669	4838.77	0.0392159	0.030727	0.0712418	0.0143319	0.0228296	0.00930875	0.060374	0.0591401	0.0165325	0.0612724	0.066526	0.166399	黑龙	0.360618	1.05421	-0.177384	0.312797	-0.364234
黑龙江	2012	1.80067	1.4993	黑龙	2012	11015.8	2119.6	5099.8	3796.5	0.135705	8.4059	2.39255	11.9771	6.51545	黑龙江	0.8791	0.6648	1.0046	1.3589	8367	6035	4776.48	0.3412	3.0595	240.28	2119.6	9694.75	30	0.154914	4979.77	0.0392159	0.030727	0.0712418	0.0143319	0.0228296	0.00930875	0.060374	0.0591401	0.0165325	0.0612724	0.066526	0.185168	黑龙	0.603893	1.54924	0.30551	0.339009	-0.163038
黑龙江	2013	1.74733	1.51583	黑龙	2013	11849.1	2539.6	5202.7	4106.9	0.137036	8.024	2.96443	11.9842	6.64704	黑龙江	1.414	1.0449	1.5258	2.4297	9369	7192	5342.12	0.6935	2.93074	244.96	2539.6	11453.1	29.6	0.181875	3609.73	0.0392159	0.030727	0.0712418	0.0143319	0.0228296	0.00930875	0.060374	0.0591401	0.0165325	0.0612724	0.066526	0.190867	黑龙	0.642926	-1.61215	0.850425	0.347515	-0.0528715
黑龙江	2014	1.7355	1.50407	黑龙	2014	12170.8	2691	4872.4	4607.4	0.142003	8.063	3.30714	11.9982	6.76446	黑龙江	1.678	1.5248	1.4248	2.6441	10453	7830	5305.2	0.56556	2.81207	251.93	2691	9828.99	29.6	0.189175	3708.28	0.0392159	0.030727	0.0712418	0.0143319	0.0228296	0.00930875	0.060374	0.0591401	0.0165325	0.0612724	0.066526	0.196747	黑龙	0.788513	-1.28931	1.17697	0.364142	0.0454369
黑龙江	2015	1.84465	1.50679	黑龙	2015	11690	2712.2	3926.9	5050.9	0.169495	8.165	3.60578	12.0029	6.86098	黑龙江	2.0993	1.7468	1.6406	4.0972	11095	8391	5530.84	0.71828	2.72163	255.31	2712.2	10183	27.2	0.187059	3834.23	0.0392159	0.030727	0.0712418	0.0143319	0.0228296	0.00930875	0.060374	0.0591401	0.0165325	0.0612724	0.066526	0.207538	黑龙	1.59434	-0.444946	1.46153	0.369752	0.126242
黑龙江	2016	1.83345	1.50495	黑龙	2016	11895	2751.2	3689.7	5454	0.189663	8.204	3.86113	12.0107	6.95987	黑龙江	2.2189	1.9124	2.0654	3.5097	11832	9424	5932.74	0.63066	2.63201	252.75	2751.2	10648.4	27	0.190007	4213.42	0.0392159	0.030727	0.0712418	0.0143319	0.0228296	0.00930875	0.060374	0.0591401	0.0165325	0.0612724	0.066526	0.222993	黑龙	2.18551	-0.122101	1.70483	0.378951	0.209039
黑龙江	2017	1.76049	1.51071	黑龙	2017	12313	2965.3	3519.5	5828.2	0.17564	8.234	4.314	12.0197	7.03896	黑龙江	2.5678	2.26	2.7586	3.2377	12665	10524	6030.97	0.27352	2.54011	251.2	2965.25	11292	26.9	0.205646	4477.31	0.0392159	0.030727	0.0712418	0.0143319	0.0228296	0.00930875	0.060374	0.0591401	0.0165325	0.0612724	0.066526	0.244309	黑龙	1.77447	0.126241	2.13635	0.389642	0.275251
黑龙江	2018	2.08035	1.36687	黑龙	2018	12846.5	3001.2	3536	6309.3	0.178429	8.115	4.62638	12.0264	7.10011	黑龙江	2.7473	2.5612	2.5488	3.7228	13804	11417	6119.57	0.34912	2.41153	245.64	3001.17	10761.3	26.2	0.209918	4895.44	0.0392159	0.030727	0.0712418	0.0143319	0.0228296	0.00930875	0.060374	0.0591401	0.0165325	0.0612724	0.066526	0.253736	黑龙	1.85623	-0.858849	2.434	0.39768	0.326448
黑龙江	2019	2.15331	1.3723	黑龙	2019	13544.4	3183.2	3640.1	6721.1	0.175991	8.169	5.14933	12.0359	6.51782	黑龙江	2.9287	2.7579	2.7464	3.8241	14982	12495	6177.59	0.40407	2.32268	223.27	3183.2	11439.2	31.9	0.221272	5334.08	0.0392159	0.030727	0.0712418	0.0143319	0.0228296	0.00930875	0.060374	0.0591401	0.0165325	0.0612724	0.066526	0.26726	黑龙	1.78476	-0.411834	2.93229	0.408959	-0.161058
黑龙江	2020	2.16234	1.36461	黑龙	2020	13633.4	3445.1	3449.9	6738.5	0.167822	8.171	5.90381	12.0324	6.42778	黑龙江	3.0608	2.9048	2.9369	3.8009	16168	12360	6171.61	0.22076	2.20073	224.22	3445.1	11851	35.8	0.23706	5747.49	0.0392159	0.030727	0.0712418	0.0143319	0.0228296	0.00930875	0.060374	0.0591401	0.0165325	0.0612724	0.066526	0.275298	黑龙	1.54531	-0.395278	3.6512	0.404789	-0.236438
黑龙江	2021	2.25425	1.39658	黑龙	2021	14858.2	3463.4	4086.5	7308.3	0.170228	8.355	6.02497	12.0338	6.53539	黑龙江	3.1937	3.0531	3.1363	3.7807	17889	15225	6220.51	0.4659	2.17951	238.97	3463.4	12609.5	37.5	0.236103	6269.7	0.0392159	0.030727	0.0712418	0.0143319	0.0228296	0.00930875	0.060374	0.0591401	0.0165325	0.0612724	0.066526	0.28371	黑龙	1.61583	1.12789	3.76664	0.406449	-0.14635
黑龙江	2022	2.29718	1.41	黑龙	2022	15831.5	3635.3	4576.7	7619.4	0.171972	8.373	6.41666	12.0374	6.46879	黑龙江	3.3303	3.2084	3.3433	3.7659	18577	15162	6152.89	0.33265	2.14493	238.5	3635.3	12685.2	35.9	0.243987	6717.94	0.0392159	0.030727	0.0712418	0.0143319	0.0228296	0.00930875	0.060374	0.0591401	0.0165325	0.0612724	0.066526	0.289452	黑龙	1.66696	1.27689	4.13986	0.410703	-0.20211

## Sheet: Resilience data
时间	地区	ARCR	SECA	EIA	ADLR	PUA	RPDI	RCCR	REA	AMD	LOE	LGAE	AER
2022	北京市	2758.49	990.99	112.14	0.3587	6.61	34754	19.6	60.63	1.18714	0.786454	462.79	0.229594
2022	天津市	670.21	104.5	293.98	0	15.52	29018	20.5	52.47	1.19619	0.638993	110.3	0.150011
2022	河北省	2042.54	6359.83	4102.86	0.43237	271.64	19364	55.4	471.25	0.983624	0.578926	872.14	0.449055
2022	山西省	1012.93	8070.26	1502.01	0.22569	103.47	16323	43	156.16	2.10678	0.391905	576.87	0.220943
2022	内蒙古自治区	667.02	16678.7	4379.31	0.63467	227.36	19641	37.4	103.29	1.9038	0.30969	912.44	0.279158
2022	辽宁省	1000.7	6144.1	1716.63	0.41711	130.51	19908	37.2	130.05	1.62796	0.620727	463.34	0.233456
2022	吉林省	677.7	3230.31	1906.48	0.39741	222.75	18134	41.5	58.77	1.42877	0.279826	515.49	0.178796
2022	黑龙江省	982.44	6717.94	6152.89	0.33265	238.5	18577	35.9	86.27	2.14493	0.243987	937.59	0.289452
2022	上海市	2095.01	62	160.62	0	6.56	39729	7.4	6.09	2.6866	0.389717	388.62	0.21052
2022	江苏省	4317.72	970.1	3851.74	0.54684	270.14	28486	38.4	542.02	1.43125	0.71268	1108.36	0.619569
2022	浙江省	2713.01	3744.64	1226.14	0.43102	67.05	37565	37.3	575.63	1.14687	1.18244	831.2	0.507978
2022	安徽省	1418.24	2284.94	4576.18	0.18263	280.19	19575	45.9	305.92	1.26357	0.416663	991.88	0.398599
2022	福建省	1104.21	4279.05	855.47	0.21246	92.07	24987	38.7	277.45	1.29724	1.89752	410.37	0.360011
2022	江西省	972.47	6468.49	2166.49	0.47225	107.71	19936	50.8	186.49	2.01911	0.449835	788.48	0.314616
2022	山东省	2907.84	4722.48	5209.09	0.29231	362.09	22110	40.6	463.2	0.950882	0.617376	1118.86	0.557345
2022	河南省	2369.53	4269.67	5623.22	0.09804	595.31	18697	48.4	505.53	1.35482	0.419386	1110.48	0.508306
2022	湖北省	1952.47	6730.96	3208.84	0.28852	257.98	19709	40.8	232.39	1.67914	0.649652	924.84	0.413202
2022	湖南省	1613.74	4415.8	2876	0.30513	215.87	19546	39.8	332.52	1.2717	0.567232	995.44	0.391127
2022	广东省	4366.51	2091.13	1560.23	0.2608	208.74	23598	27	564.51	1.78127	1.21481	1067.57	0.636376
2022	广西壮族自治区	809.61	3424.98	1549.35	0.15452	249.2	17433	40.1	211.99	1.63947	0.702267	737.07	0.314971
2022	海南省	200.9	159.35	330.17	0.42857	38.64	19117	41.7	46.13	1.08765	2.14121	265.65	0.174994
2022	重庆市	981.09	4109.04	669.87	0.34641	88.74	19313	39.3	88.36	2.22216	0.591718	393.85	0.234956
2022	四川省	2297.79	12028.6	2975.74	0.33853	204.37	18672	44.1	293.65	2.07733	0.599676	1359.32	0.520107
2022	贵州省	504.24	8223.38	1185.17	0.4598	75.41	13707	40.7	164.23	1.91019	0.563565	692.15	0.24468
2022	云南省	725.02	11636.9	2035.26	0.45917	183.38	15147	42.9	165.74	2.44732	0.573596	888.43	0.313842
2022	西藏自治区	39.44	898.47	304.63	0.41772	2.83	18209	40.5	5.35	0.444238	0.667292	371.87	0.0891225
2022	陕西省	1102.02	8624.42	1161.63	0.32044	194.16	15704	39.3	156.92	1.70268	0.643507	733.21	0.292235
2022	甘肃省	490.9	11505.1	1349.48	0.25661	77.13	12165	41.1	108.92	1.61402	0.384373	751.51	0.221564
2022	青海省	106.39	1865.57	222.01	0.31432	4.71	14456	47.5	14.55	1.16476	0.656784	275.13	0.105405
2022	宁夏回族自治区	215.83	2666.45	560.57	0.3688	36.88	16430	39.4	33.35	1.79294	0.360238	244.88	0.110278
2022	新疆维吾尔自治区	681.3	2613.44	6534.69	0.23777	243.68	16550	43	218.72	2.11135	0.408832	950.09	0.281245
2021	北京市	2526.93	977.98	109.32	0.1	6.3	33303	19.2	66.88	0.971959	0.96224	497.87	0.233428
2021	天津市	660.47	103.96	285.43	0.26563	15.66	27955	21	62.04	1.17322	0.63135	148.01	0.153355
2021	河北省	1994.5	6147.02	3952.24	0.49396	276.87	18179	57	476.09	1.00005	0.529343	924.79	0.431027
2021	山西省	997.5	7731.93	1498.06	0.3458	105.64	15308	42.7	156.43	2.16893	0.378183	514.23	0.211757
2021	内蒙古自治区	645.56	15959.2	4379.28	0.59224	241.9	18337	38.5	119.79	2.06239	0.273065	818.84	0.268809
2021	辽宁省	980.03	5936.1	1693.05	0.36451	135.03	19217	37	167.92	1.69589	0.588343	409.44	0.230503
2021	吉林省	691.29	3004.09	1918.95	0.19494	223	17642	39.9	72.31	1.49113	0.259283	462.32	0.177129
2021	黑龙江省	995.47	6269.7	6220.51	0.4659	238.97	17889	37.5	117.14	2.17951	0.236103	868.98	0.28371
2021	上海市	1970.9	59	161.98	0.58233	6.59	38521	7.2	11.32	2.573	0.399849	455.77	0.198975
2021	江苏省	4051.1	959.9	3826.29	0.17327	275.56	26791	37.5	520.22	1.45962	0.675192	1106.2	0.629932
2021	浙江省	2484.66	3702.58	1260.54	0.25452	68.26	35247	37.3	424.46	1.13584	1.13025	795.27	0.468642
2021	安徽省	1379.67	2219	4509.87	0.21142	284.73	18372	47.5	280.41	1.28342	0.399324	942.55	0.38347
2021	福建省	1051.79	4146.54	825.77	0.35106	96.63	23229	38.8	311.73	1.30015	1.82048	366.61	0.337752
2021	江西省	909.6	6333.42	2158.03	0.3213	108.59	18684	50.7	167.16	2.10471	0.42976	762.26	0.303865
2021	山东省	2816.49	4583.12	5069.92	0.17663	371.03	20794	41.6	507.75	0.97877	0.589071	1026.95	0.542417
2021	河南省	2360.03	4141.81	5518.24	0.42315	624.66	17533	49.1	451.43	1.38074	0.402268	1015.22	0.481702
2021	湖北省	1878.11	6568.5	3111.09	0.40687	262.62	18259	40.6	203.56	1.7139	0.607135	841.65	0.384872
2021	湖南省	1508.75	4244.92	2875.06	0.32393	219.06	18295	39.7	331.23	1.27378	0.536378	949.01	0.374504
2021	广东省	4153.2	2034.54	1529.21	0.42016	212.87	22306	26.4	690.4	1.7819	1.14515	1109.47	0.632217
2021	广西壮族自治区	780.6	3237.28	1434.96	0.33268	251.89	16363	40	236.83	1.58954	0.675676	757.8	0.2993
2021	海南省	198.3	147.3	326.62	0.32288	40.77	18076	35.6	62.65	1.08566	1.89944	260.72	0.161745
2021	重庆市	965.5	3947.31	665.27	0.46477	89.05	18100	38.8	85.57	2.22471	0.575873	406.26	0.225689
2021	四川省	2204.91	11501.8	2784.14	0.25019	207.16	17575	45	273.15	2.06871	0.581815	1330.1	0.482177
2021	贵州省	496.26	7899.87	1270.21	0.43711	75.98	12856	40.4	167.95	2.00446	0.530659	730.74	0.240876
2021	云南省	690.2	11092.9	1988.24	0.40885	187.33	14197	42.8	173.75	2.48592	0.552978	919.74	0.302124
2021	西藏自治区	39.98	804.18	297.88	0.15493	4.33	16932	42.9	4.79	0.460128	0.614537	340.54	0.0897297
2021	陕西省	1052.37	8350.48	1192.47	0.32532	200.7	14745	38.1	154.29	1.72312	0.604521	694.26	0.270556
2021	甘肃省	490.32	10829.5	1298.94	0.58638	77.05	11433	41.4	114.01	1.67639	0.351881	737.04	0.20588
2021	青海省	106.89	1702.2	217.75	0.60802	4.89	13604	47.8	14.48	1.18355	0.613493	251.05	0.0964629
2021	宁夏回族自治区	211.14	2567.89	563.78	0.28659	37.46	15337	38.6	40.63	1.79852	0.3263	242.37	0.108838
2021	新疆维吾尔自治区	685.69	2407.07	6666.39	0.34812	240.69	15575	43.1	269.92	2.13207	0.389578	849.55	0.268947
2020	北京市	2302.91	928.69	109.35	0.875	6.06	30126	20.1	65.28	0.816669	1.12752	497.33	0.207903
2020	天津市	672.09	101.84	299.12	0.63953	15.29	25691	20.9	57.6	1.14816	0.520791	154.82	0.132841
2020	河北省	2088.64	5934.37	4470.03	0.25498	285.71	16467	60.5	454.73	1.01553	0.508465	988.74	0.421133
2020	山西省	932.77	7395.74	1517.38	0.27643	107.41	13878	42.8	140.27	2.22002	0.347874	653.68	0.204529
2020	内蒙古自治区	740	15221.5	3199.12	0.53163	207.69	16567	38.6	107.96	2.18973	0.231909	867.59	0.245543
2020	辽宁省	969.6	5723.58	1632.54	0.68521	137.57	17450	37	159.19	1.73506	0.552804	504.83	0.208031
2020	吉林省	710.09	2801.6	1905.44	0.48483	225.29	16067	39.9	69.08	1.57841	0.260218	577.76	0.168819
2020	黑龙江省	987.26	5747.49	6171.61	0.22076	224.22	16168	35.8	112.2	2.20073	0.23706	914.53	0.275298
2020	上海市	1864.99	57	165.05	0	6.89	34911	6.2	10.18	2.49863	0.45736	473.8	0.189418
2020	江苏省	4015.1	950.69	4224.73	0.34513	280.75	24198	36.5	479.61	1.43434	0.651008	1091.25	0.576897
2020	浙江省	2476.94	3659.68	1415.7	0.38826	69.61	31930	38.3	343.02	1.11104	1.10271	764.89	0.431547
2020	安徽省	1403.53	2157	4608.83	0.63002	289.9	16620	46.8	268.17	1.29686	0.380325	924.29	0.349644
2020	福建省	1005.79	4031.8	1110.42	0.32312	100.81	20880	38.3	294.62	1.29445	1.73595	450.05	0.324662
2020	江西省	927.86	6195.89	2038.49	0.34383	108.81	16981	51.3	160.81	2.17841	0.412464	740.31	0.285338
2020	山东省	2971.55	4430.25	5293.56	0.23234	380.88	18753	42.7	485.14	0.993105	0.528062	1065.29	0.507856
2020	河南省	2506	4033.79	5463.07	0.21703	647.98	16108	49.6	426.52	1.40371	0.381298	1145.4	0.463069
2020	湖北省	1854.38	6396.04	3086.04	0.47929	267.32	16306	40.7	204.05	1.72379	0.546625	868.9	0.349843
2020	湖南省	1513.06	4063.13	3192.9	0.27096	223.73	16585	39.6	309.88	1.27488	0.531182	987.71	0.359266
2020	广东省	4199.34	1953.71	1776.46	0.3151	219.8	20143	25.8	615.42	1.78399	1.09636	1125.81	0.586927
2020	广西壮族自治区	734.33	3048.05	1731.03	0.18332	247.85	14815	39.8	211.61	1.56542	0.615213	904.38	0.284334
2020	海南省	205.91	139.33	292.21	0.34653	42.61	16279	46	54.87	1.09957	1.74098	268.57	0.149547
2020	重庆市	987.62	3856	698.32	0.29716	89.83	16361	37.7	82.5	2.25138	0.544693	416.76	0.208963
2020	四川省	2273.57	10974.6	2992.24	0.36443	210.82	15929	45.4	256.56	2.07192	0.578808	1339.36	0.458507
2020	贵州省	511.77	7577	1165.49	0.43359	78.78	11642	39.7	160.46	2.12029	0.488663	1024.31	0.229927
2020	云南省	756.45	10543.1	1978.07	0.3431	196.65	12842	42.8	163.98	2.50818	0.525704	1100.13	0.292213
2020	西藏自治区	39.81	711.91	282.82	0.3913	4.4	14598	44.1	3.63	0.471722	0.56748	415.44	0.0812111
2020	陕西省	1102.74	8163.74	1336.81	0.48506	201.91	13316	37.8	142.07	1.74243	0.572431	742.25	0.25863
2020	甘肃省	485.19	10100	1338.6	0.35895	80.36	10344	40.9	104.15	1.7173	0.312146	775.83	0.197709
2020	青海省	103.63	1607.76	219.25	0.2993	5.45	12342	47.5	13.94	1.16282	0.599034	279.8	0.097267
2020	宁夏回族自治区	210.71	2471.53	552.53	0.17902	38.06	13889	40.5	36.08	1.82308	0.303433	253.45	0.104129
2020	新疆维吾尔自治区	681.91	2202.31	4893.35	0.54974	248.23	14056	43.3	217.37	2.14376	0.334108	1127.88	0.232173
2019	北京市	2076.45	901.57	109.24	0.08	6.17	28928	17.4	67.77	0.720856	1.32016	584.62	0.215728
2019	天津市	617.89	100.62	304.8	0.57595	16.24	24804	19.9	39.24	1.14015	0.467497	161.51	0.125417
2019	河北省	1989.16	5722.22	4482.16	0.46076	297.27	15373	53.2	501.57	1.03856	0.458335	978.27	0.394385
2019	山西省	883.34	7086.54	1519.34	0.39811	108.41	12902	43.9	104.9	2.32241	0.24841	626.04	0.18584
2019	内蒙古自治区	729.82	14625	3199.19	0.42779	218.44	15283	37.5	91.16	2.298	0.213112	874.73	0.239297
2019	辽宁省	918.72	5553.41	1629.18	0.23961	139.91	16108	27.1	176.97	1.79155	0.53755	502.57	0.206705
2019	吉林省	679.37	2594.45	1909.5	0.36777	227.06	14936	30.6	54.88	1.67419	0.217981	564.35	0.156248
2019	黑龙江省	952.16	5334.08	6177.59	0.40407	223.27	14982	31.9	85.64	2.32268	0.221272	881.99	0.26726
2019	上海市	1720.01	55	190.76	0	7.53	33195	7.7	1102.04	2.66616	0.433452	523.1	0.25437
2019	江苏省	3750.21	940.39	4205.44	0.25914	286.21	22675	36.5	1949.11	1.45593	0.61966	1032.37	0.629263
2019	浙江省	2251.45	3611.39	1405.43	0.34652	72.5	29876	38.2	1026.73	1.048	1.06815	744.24	0.449337
2019	安徽省	1348.65	2084.46	4580.84	0.54906	298.02	15416	49.7	189.15	1.3205	0.349489	736.27	0.316964
2019	福建省	948.09	3895.94	1076.78	0.4606	106.26	19568	38	417.92	1.29212	1.68268	442.06	0.328818
2019	江西省	835.19	6070.46	2036.14	0.55518	115.57	15796	54.4	119.24	2.2347	0.386838	619.8	0.25806
2019	山东省	2750.99	4277.56	5271.37	0.51115	395.34	17775	41.6	435.92	1.02371	0.500965	1075.98	0.467339
2019	河南省	2430.84	3913.36	5328.95	0.39596	666.72	15164	48.1	353.83	1.42068	0.330346	1059.7	0.419175
2019	湖北省	1728.57	6270.38	2968.99	0.33256	273.89	16391	37.3	178.55	1.73081	0.513608	828.21	0.335026
2019	湖南省	1396.12	3905.68	3176.11	0.40669	229.01	15395	38	132.98	1.2551	0.474037	978.68	0.318879
2019	广东省	4112.23	1858.08	1773.4	0.30546	225.79	18818	25.1	1448.04	1.77433	1.02775	957.68	0.581938
2019	广西壮族自治区	664.92	2845.51	1713.08	0.39871	252.04	13676	44.5	126.47	1.55967	0.583366	747.21	0.252897
2019	海南省	202.67	136.81	290.63	0.16667	46.26	15113	34.9	18.68	1.16346	1.65326	251.4	0.138696
2019	重庆市	916.46	3722.49	697.68	0.33844	91.08	15133	36.5	80.9	2.2843	0.472631	389.53	0.193508
2019	四川省	2148.66	10463.6	2954.09	0.40797	222.77	14670	44.4	205.8	2.07013	0.509441	1288.42	0.419345
2019	贵州省	489.26	7321.37	1153.99	0.31064	83.18	10756	38.2	104.94	2.20621	0.439291	998.9	0.213317
2019	云南省	742.1	10047.7	1922.49	0.34457	204.03	11902	41.5	120.42	2.55631	0.446212	1117.2	0.270093
2019	西藏自治区	36.65	622.55	275.94	0.05455	4.82	12951	43	2.48	0.485725	0.523331	445.01	0.0818057
2019	陕西省	1033.49	8039.84	1285.16	0.33995	202.52	12326	37	137.82	1.7723	0.507782	684.18	0.243114
2019	甘肃省	444.32	9574.74	1328.86	0.50461	80.88	9629	40	61.69	1.76244	0.286358	716.76	0.181391
2019	青海省	98.44	1408.13	213.33	0.36415	6.19	11499	46.8	7.14	1.14311	0.552806	324.09	0.0919142
2019	宁夏回族自治区	197.67	2388.1	538.29	0.25086	38.44	12858	39.4	16.12	1.82387	0.258205	218.16	0.0949616
2019	新疆维吾尔自治区	654	2008.1	4959.89	0.42997	257.76	13122	41	124.83	2.21228	0.306062	977.41	0.217014
2018	北京市	1793.2	813.73	109.67	0.46809	7.29	26490	11.5	65.14	0.826025	1.18123	576.04	0.19311
2018	天津市	559.99	100.01	304.66	0.5	16.95	23065	20	36.91	1.23361	0.421646	165.71	0.118277
2018	河北省	1789.29	5532.54	4492.33	0.63914	312.4	14031	51.7	505.16	1.06371	0.429699	906.27	0.368164
2018	山西省	824.58	6798.51	1518.68	0.70655	109.61	11750	42.3	101.42	2.46699	0.221762	581.34	0.171323
2018	内蒙古自治区	659.25	14088.6	3196.52	0.60092	222.67	13803	33.4	85.51	2.40854	0.201698	903.96	0.228051
2018	辽宁省	852.57	5394.54	1619.33	0.31711	145.02	14656	23.3	306.22	1.87506	0.501437	461.74	0.209183
2018	吉林省	629.89	2385.81	1893.05	0.26135	228.3	13748	23.3	54.85	1.75444	0.198162	537.55	0.150488
2018	黑龙江省	898.72	4895.44	6119.57	0.34912	245.64	13804	26.2	82.8	2.41153	0.209918	834.47	0.253736
2018	上海市	1406.25	53	190.76	0.39726	8.37	30375	6.6	1053.42	3.00383	0.3982	469.88	0.230613
2018	江苏省	3317.26	930.24	4179.83	0.46684	292.45	20845	30.8	1933.14	1.49874	0.589264	996.67	0.595548
2018	浙江省	1953.88	3692.54	1440.8	0.63642	77.76	27302	36.7	1008.31	0.984746	1.02053	724.46	0.424901
2018	安徽省	1209.73	1989.18	4538.29	0.54263	311.8	13996	44.9	180.79	1.34037	0.316494	704.86	0.29402
2018	福建省	871.8	3778.43	1085.18	0.61499	110.74	17821	35.5	403.87	1.28417	1.56234	431.51	0.295899
2018	江西省	754.02	5917.85	2032.02	0.68476	123.2	14460	51.2	112.47	2.33244	0.350606	599.41	0.238548
2018	山东省	2519.83	4142.96	5235.99	0.58396	420.35	16297	38.4	416.24	1.06352	0.476121	998.5	0.446478
2018	河南省	2261.74	3778.27	5288.69	0.72835	692.79	13831	42.8	330.59	1.44871	0.304478	1001.08	0.387457
2018	湖北省	1471.4	6134.72	2931.9	0.44225	295.82	14978	33.1	165.21	1.79742	0.469552	785.55	0.305047
2018	湖南省	1255.14	3745.54	3164	0.49536	242.61	14093	42	130.82	1.27964	0.40272	925.57	0.28914
2018	广东省	3471.79	1757.89	1775.21	0.30887	231.32	17168	23.1	1443.1	1.7611	0.922778	909.78	0.521519
2018	广西壮族自治区	629.05	2647.73	1706.88	0.568	255.05	12435	44.5	108.25	1.59229	0.521802	656.58	0.223281
2018	海南省	183.2	116.72	290.48	0.34877	48.37	13989	33.3	17.41	1.26001	1.43098	227.71	0.122641
2018	重庆市	806.09	3580.06	696.94	0.6488	93.17	13781	33.7	79.53	2.34468	0.419712	366.77	0.175061
2018	四川省	1956.52	9961.81	2932.54	0.60971	235.21	13331	43.5	198.62	2.08853	0.47261	1310.89	0.390518
2018	贵州省	444.74	7052.95	1132.24	0.61227	89.48	9716	30.5	98.41	2.30457	0.414996	664.84	0.186595
2018	云南省	667.94	9517.65	1898.07	0.62664	217.37	10768	38.2	104.94	2.55829	0.370438	842.2	0.233257
2018	西藏自治区	33.45	528.5	264.53	0.82474	5.19	11450	38.7	1.59	0.495401	0.488941	364.64	0.0611305
2018	陕西省	970.54	7917.95	1274.99	0.72202	229.64	11213	35.5	133.6	1.76963	0.471228	626.79	0.223088
2018	甘肃省	398.98	9090.65	1337.54	0.68974	83.17	8804	36.4	59.08	1.79454	0.255012	678.35	0.165532
2018	青海省	87.65	1251.66	214.04	0.82081	8.32	10393	50.4	6.55	1.18039	0.488111	267.85	0.0777868
2018	宁夏回族自治区	182.92	2301.07	523.45	0.56516	38.37	11708	39.5	15.05	1.87266	0.254257	219.06	0.0866641
2018	新疆维吾尔自治区	577.09	1688.11	4883.46	0.67279	254.99	11975	26.8	119.54	2.22158	0.295112	753.25	0.189182
2017	北京市	1972.96	777.63	115.48	0.23881	8.55	24240	9.6	61.51	0.90585	1.02778	518.35	0.186257
2017	天津市	564.96	99.25	306.62	0	18.01	21754	20.6	40.32	0.945916	0.395886	158.36	0.119014
2017	河北省	1713.89	5379.15	4474.67	0.46838	322	12881	51.9	615.16	1.10567	0.393514	782.91	0.352086
2017	山西省	823.21	6484.79	1511.21	0.45124	112	10788	45.2	99.26	2.59945	0.213578	477.91	0.168185
2017	内蒙古自治区	570.06	13551	3174.83	0.61726	235.04	12584	28.9	78.9	2.58765	0.186117	807.71	0.220218
2017	辽宁省	946	5217.84	1610.55	0.3076	145.47	13747	20.7	528.01	1.88355	0.479445	459.23	0.219203
2017	吉林省	641.39	2180.7	1893.05	0.53057	231.02	12950	25.6	52.96	1.85292	0.186931	554.77	0.142519
2017	黑龙江省	931.44	4477.31	6030.97	0.27352	251.2	12665	26.9	79.77	2.54011	0.205646	815.16	0.244309
2017	上海市	1587.19	51	190.76	0	8.9	27825	6.5	1013.2	2.33872	0.403931	456.53	0.223579
2017	江苏省	3449.27	918.81	4131.88	0.64498	303.85	19158	30.8	1887.99	1.51388	0.570973	918.22	0.560579
2017	浙江省	1844.41	3721.06	1444.7	0.50047	82.63	24956	38.3	976.65	0.95601	0.995805	696.69	0.381712
2017	安徽省	1107.36	1940.33	4504.14	0.50425	318.72	12758	44.8	171.31	1.38237	0.310233	681.91	0.265407
2017	福建省	831.84	3651.69	1064.84	0.45217	116.32	16335	35.1	388.38	1.25715	1.48089	447.7	0.272683
2017	江西省	727.29	5787.3	2039.42	0.69937	134.97	13242	45.9	108.5	2.44131	0.336705	607.71	0.219828
2017	山东省	2341.09	4005.43	5191.06	0.36329	439.96	15118	38.5	488.45	1.09501	0.460461	953.59	0.430038
2017	河南省	2019.92	3672.95	5273.63	0.52005	706.7	12719	42.9	328.82	1.46763	0.292591	916.81	0.359164
2017	湖北省	1347.28	5963.49	2919.17	0.49753	317.93	13812	32.9	156.57	1.83529	0.46383	714.73	0.277206
2017	湖南省	1109.7	3592.19	3145.87	0.45742	245.26	12936	42.6	128.56	1.33049	0.380355	782.42	0.262599
2017	广东省	3275.81	1638.7	1774.61	0.46815	258.3	15780	22.6	1414.77	1.75359	0.878224	754.4	0.469093
2017	广西壮族自治区	565.11	2463.76	1669.87	0.31531	263.83	11325	42.9	103.53	1.63186	0.49661	646.87	0.202851
2017	海南省	164.83	108.42	289.25	0.24074	51.36	12902	32.8	15.52	1.24507	1.40012	198.42	0.118636
2017	重庆市	744	3397.39	694.26	0.35346	95.46	12638	33.7	80.18	2.46899	0.389363	347.57	0.169631
2017	四川省	1937.64	9456.96	2873.1	0.60686	241.95	12227	42.1	188.44	2.16615	0.455904	1023.13	0.35726
2017	贵州省	389.31	6814.62	1114.12	0.57276	95.65	8869	36.3	95.11	2.59434	0.378134	612.05	0.175881
2017	云南省	612.66	9004.38	1851.42	0.57329	231.94	9862	38.1	102.34	1.92127	0.351741	674.82	0.199887
2017	西藏自治区	28.01	419.11	261.23	0.75781	5.53	10330	39.3	1.34	0.485672	0.478252	238.09	0.0546409
2017	陕西省	869.01	7765.02	1263.09	0.47965	232.15	10265	35.3	130.85	1.8122	0.450456	545.4	0.212349
2017	甘肃省	366.38	8580.49	1331.43	0.48597	84.49	8076	40.4	55.85	1.85874	0.238804	520.79	0.153142
2017	青海省	80.2	1134.06	206.61	0.58994	8.67	9462	49.1	6.42	1.20106	0.435793	233.12	0.0740676
2017	宁夏回族自治区	165.29	2214.84	511.45	0.64794	40.8	10738	40.3	14.63	1.87094	0.235116	222.39	0.0806067
2017	新疆维吾尔自治区	523.48	1420.22	4952.29	0.78817	250.74	11045	26.3	111.13	2.23089	0.278633	612.49	0.177276
2016	北京市	1834.25	742.73	128.47	0.76081	9.65	22310	7.6	54.71	1.00762	0.908279	443.55	0.164597
2016	天津市	527.99	98.84	306.62	0.89167	21.78	20076	20.5	92.19	0.943957	0.393545	161.02	0.10595
2016	河北省	1491.49	5187.9	4457.64	0.3882	331.79	11919	50	600.78	1.14395	0.38206	800.79	0.331947
2016	山西省	698.2	6171.76	1487.29	0.41056	117.07	10082	45.4	97.52	2.05906	0.213502	432.02	0.161843
2016	内蒙古自治区	487.04	13083.3	3131.53	0.62743	234.64	11609	34	71.09	2.68897	0.187223	729.02	0.214017
2016	辽宁省	837.76	5024.22	1572.99	0.21086	148.06	12881	20.9	489.8	1.95657	0.45862	480.73	0.213596
2016	吉林省	557.12	1987.1	1832.17	0.61053	233.61	12123	26.2	51.13	1.95257	0.193147	550.5	0.136635
2016	黑龙江省	685.53	4213.42	5932.74	0.63066	252.75	11832	27	77.47	2.63201	0.190007	801.77	0.222993
2016	上海市	1528.79	49	189.81	0.70968	9.13	25520	7.1	983.22	2.48369	0.389427	327.41	0.200446
2016	江苏省	2679.68	907.89	4054.07	0.22119	312.52	17606	30.4	1869.27	1.55708	0.561015	985.62	0.537839
2016	浙江省	1527.65	3699.86	1446.31	0.37675	84.48	22866	39.3	926.09	0.91097	0.989232	722.41	0.364449
2016	安徽省	873.7	1901.79	4437.46	0.41575	327.01	11720	44.8	161.62	1.27996	0.29622	624.83	0.24559
2016	福建省	754.91	3579.01	1055.37	0.50091	123.84	14999	35.5	384.45	1.2204	1.43401	410.58	0.253675
2016	江西省	608.72	5674.9	2036.83	0.5007	141.97	12138	46.7	104.58	2.57487	0.326678	580.9	0.210552
2016	山东省	1963.32	3879.4	5161.16	0.41344	456.46	13954	38.9	488.84	1.15116	0.449727	943.44	0.40927
2016	河南省	1551.82	3600.81	5242.92	0.45908	715.03	11697	42.7	317.23	1.51221	0.282995	807.06	0.331179
2016	湖北省	1047.79	5830.58	2905.57	0.54925	327.96	12725	32.9	152.86	1.88848	0.44609	704.59	0.258225
2016	湖南省	884.98	3433.77	3132.37	0.42326	246.44	11930	41.9	126.7	1.36801	0.367212	729.75	0.240077
2016	广东省	2982.11	1536.17	1771.71	0.29745	261.02	14512	23.4	1334.78	1.74924	0.859392	715.44	0.435257
2016	广西壮族自治区	469.17	2284.89	1646.07	0.30664	262.14	10359	42.6	95.37	1.69161	0.482173	573.48	0.184039
2016	海南省	133.21	96.13	289.95	0.19301	50.62	11843	31.6	13.89	1.41685	1.30018	179.04	0.111749
2016	重庆市	600.33	3233.87	690.6	0.6271	96.14	11549	33.6	78.69	2.52764	0.377546	347.99	0.154532
2016	四川省	1703.52	8980.33	2813.55	0.58962	248.98	11203	42	183.08	2.22477	0.420474	988.71	0.328121
2016	贵州省	320.69	6556.46	1088.07	0.51497	103.67	8090	36.5	85.25	2.74602	0.349682	629.38	0.165098
2016	云南省	529.23	8540.74	1809.39	0.50351	235.58	9020	38	95.26	1.97249	0.334865	712.92	0.18944
2016	西藏自治区	22.25	323.27	251.53	0.75172	5.91	9094	43.1	1.21	0.414318	0.431693	243.28	0.0508629
2016	陕西省	713.97	7571.21	1251.39	0.57608	233.05	9396	33.7	118.68	1.91543	0.427605	543.3	0.19989
2016	甘肃省	307.66	7864.73	1317.51	0.60664	93.42	7457	40.4	54.22	1.96922	0.222581	488.1	0.141226
2016	青海省	68.75	1014.42	202.35	0.8144	8.76	8664	37.7	5.94	1.21631	0.402869	232.35	0.0628777
2016	宁夏回族自治区	133.89	2136.54	515.15	0.61347	40.72	9852	40.8	14.16	1.92726	0.228538	201.29	0.0769947
2016	新疆维吾尔自治区	439.29	1256.27	4982.03	0.62673	250.19	10183	25.7	108.16	2.32011	0.262444	717.02	0.173554
2015	北京市	1403.89	710.8	137.35	0.82258	10.53	20569	7.7	51.67	0.925235	0.829557	424.78	0.148217
2015	天津市	398.34	97.3	308.87	0.89535	21.78	18482	19.6	102.44	0.792218	0.386124	156.08	0.0981136
2015	河北省	1163.1	5061.55	4447.98	0.53797	335.49	11051	49.9	611.82	0.761768	0.383116	712.49	0.304606
2015	山西省	586.73	5846.39	1460.28	0.47996	118.55	9454	45.5	96.83	1.07787	0.212337	394.46	0.148178
2015	内蒙古自治区	395.48	12597.2	3086.9	0.6444	229.35	10776	33.9	72.26	2.21378	0.196506	675.58	0.200991
2015	辽宁省	708.01	4857.83	1520.31	0.65626	152.09	12057	21.1	457.76	1.54076	0.497755	446.07	0.206103
2015	吉林省	431.32	1793.5	1790.87	0.49007	231.24	11326	26	49.6	1.90256	0.218259	408.61	0.130368
2015	黑龙江省	591.77	3834.23	5530.84	0.71828	255.31	11095	27.2	72.58	2.72163	0.187059	681.48	0.207538
2015	上海市	1125.16	47	188.21	0.41463	9.92	23205	7.2	919.19	2.94631	0.369895	267.37	0.190003
2015	江苏省	1989.92	893.82	3952.5	0.4632	319.99	16257	29.9	1836.19	1.59439	0.542769	1008.6	0.506789
2015	浙江省	1207.08	3655.4	1432.15	0.46796	87.52	21125	39	905.56	0.837792	0.912023	739.08	0.349142
2015	安徽省	698.92	1857.42	4400.34	0.57536	338.69	10821	44.4	156.75	1.45849	0.257056	577.74	0.227903
2015	福建省	631.22	3399.27	1061.65	0.56813	123.8	13793	35.9	381.06	1.16837	1.23871	441.86	0.236223
2015	江西省	508.43	5577.9	2027.67	0.72787	143.58	11139	47.4	99.92	2.51608	0.311845	557.3	0.193421
2015	山东省	1543.49	3776.71	4964.43	0.48129	463.5	12930	39.8	482.3	0.852317	0.449064	964.42	0.381048
2015	河南省	1248.76	3559.76	5210.64	0.32608	716.09	10853	42.7	321.01	1.27068	0.279199	791.63	0.312281
2015	湖北省	843.63	5634.3	2899.15	0.46146	333.87	11844	32.8	149.1	1.78675	0.402196	616.57	0.239806
2015	湖南省	712.18	3259.77	3113.32	0.54947	246.54	10993	41.4	123.91	1.41757	0.344563	676.24	0.219693
2015	广东省	2166.82	1457.52	1771.26	0.58443	256.46	13360	23.3	1326.2	1.55539	0.780799	811.9	0.404189
2015	广西壮族自治区	385.75	2107.34	1618.79	0.46253	259.86	9467	42.3	83.91	1.59835	0.433144	497.53	0.164348
2015	海南省	114.25	74.58	263.99	0.49029	51.14	10858	32.4	13.02	1.48068	1.13439	164.24	0.0970125
2015	重庆市	514.58	3069.96	687.19	0.59463	97.72	10505	33.6	78.14	2.5477	0.328026	331.33	0.14122
2015	四川省	1267.3	8510.33	2735.09	0.4059	249.83	10247	41.5	174.81	2.14575	0.396305	926.65	0.30128
2015	贵州省	257.8	6297.78	1065.43	0.5254	103.69	7387	35.4	80.12	2.14857	0.309783	534.26	0.145751
2015	云南省	434.6	8074.45	1757.71	0.59068	231.87	8242	37.7	91.45	2.04577	0.311176	641.52	0.175119
2015	西藏自治区	17.36	466.09	247.8	0.45763	6.03	8244	44.6	1.28	0.370653	0.418825	200.27	0.0521228
2015	陕西省	572.45	7288.32	1236.77	0.62448	231.95	8689	34.7	110.24	1.51841	0.413728	520.58	0.180026
2015	甘肃省	256.89	7702.23	1306.72	0.57704	97.92	6936	41.2	54.04	1.40352	0.207171	497.05	0.130268
2015	青海省	56.3	898.7	196.99	0.7424	10.13	7933	37.8	5.91	1.23029	0.380021	204.41	0.0594698
2015	宁夏回族自治区	103.31	2057.2	506.53	0.76325	40.09	9119	38.1	13.79	1.36231	0.221382	166.27	0.0656966
2015	新疆维吾尔自治区	367.43	1128.88	4944.92	0.61396	248.09	9425	25.2	104.07	2.07907	0.285926	605.34	0.164988
2014	北京市	1207.24	670.8	143.11	0.68293	11.64	18867	7.8	50.56	0.994279	0.829737	343.67	0.139062
2014	天津市	317.75	94.9	308.87	0.91262	23.27	17014	18.5	109.04	0.802075	0.368163	134.91	0.08906
2014	河北省	931.94	4826.45	4404.22	0.5685	335.61	10186	49.9	631.33	0.772641	0.389632	583.52	0.29053
2014	山西省	465.37	5667.97	1408.17	0.42216	119.61	8809	45.6	97.08	1.11514	0.21173	327.85	0.135717
2014	内蒙古自治区	313.97	12210.8	3011.88	0.60933	222.67	9976	33.9	63.12	2.22408	0.205704	517.69	0.193491
2014	辽宁省	557.7	4733.48	1473.97	0.68287	151.55	11191	20.9	433.07	1.54559	0.498791	443.85	0.200758
2014	吉林省	330	1670.21	1628.43	0.46163	226.66	10780	23.5	48.75	2.01792	0.222086	308.68	0.120989
2014	黑龙江省	507.09	3708.28	5305.2	0.56556	251.93	10453	29.6	69.56	2.81207	0.189175	487.67	0.196747
2014	上海市	986.75	45	184.09	0	10.15	21192	9.8	885.64	3.14122	0.368468	202.34	0.185922
2014	江苏省	1683.76	899.66	3890.53	0.35968	323.61	14958	29.7	1834.93	1.63781	0.50004	899.31	0.459066
2014	浙江省	1051.08	3644.48	1425.37	0.48431	89.62	19373	39	905.34	0.820935	0.883847	524.59	0.316419
2014	安徽省	572.29	1702.02	4331.69	0.38983	341.39	9916	45.4	147.53	1.49237	0.250553	502.69	0.208991
2014	福建省	554.61	3388.34	1116.12	0.5731	122.61	12650	35.2	367.67	1.22057	1.15	320.32	0.215582
2014	江西省	400.37	5351.64	2001.57	0.67502	142.87	10117	47.8	97.62	2.67531	0.296841	500.15	0.175686
2014	山东省	1251.79	3612.46	4901.95	0.38054	468.08	11882	40	480.04	0.863774	0.429217	772.84	0.344043
2014	河南省	1036.08	3441.74	5101.15	0.43224	705.75	9966	41.5	313.23	1.28359	0.277629	661.94	0.283294
2014	湖北省	700.23	5414.41	2855.32	0.32442	348.27	10849	32.6	142.23	1.81495	0.395384	483.8	0.224323
2014	湖南省	587.73	3108.97	3101.7	0.58129	247.8	10060	41.2	123.83	1.48069	0.332566	557.59	0.202918
2014	广东省	1792.97	1384.91	1770.99	0.4778	249.58	12246	23.3	1314	1.60509	0.73805	557.59	0.3675
2014	广西壮族自治区	313.3	1931.76	1600	0.35714	258.68	8683	41.8	76.21	1.64122	0.422526	391.29	0.149769
2014	海南省	85.15	58.78	259.92	0.67065	49.46	9913	28.5	10.89	1.50664	1.04529	146.3	0.0849808
2014	重庆市	407.26	2908.69	677.26	0.57494	97.26	9490	33.6	78.31	2.64496	0.306029	291.62	0.128899
2014	四川省	1060.63	8159.15	2666.32	0.40052	250.19	9348	40.6	169.57	2.25419	0.383751	826.59	0.266959
2014	贵州省	213.06	6021.33	981.83	0.55928	101.29	6671	35.3	71.27	2.2415	0.239035	447.19	0.127987
2014	云南省	375.99	7734.45	1708.97	0.5805	226.86	7456	37.1	87.12	2.12839	0.298911	594.45	0.16408
2014	西藏自治区	12.76	779.76	244.03	0.87597	5.34	7359	48.6	1.18	0.397849	0.398063	169.24	0.044304
2014	陕西省	476.75	7039.06	1226.49	0.56281	230.19	7932	33.7	109.02	1.58843	0.404009	445.97	0.169857
2014	甘肃省	208.44	7567.08	1297.06	0.49703	97.6	6277	40.5	51.26	1.48321	0.195904	366.17	0.121383
2014	青海省	46.09	863.32	182.49	0.4523	9.74	7283	37.5	4.96	1.25584	0.395521	190.04	0.0617892
2014	宁夏回族自治区	83.92	1959.81	498.91	0.35661	39.67	8410	37.1	13.56	1.38589	0.20377	157.05	0.0678837
2014	新疆维吾尔自治区	317.41	1054.59	4831.89	0.5746	236.98	8724	25.1	96.52	2.16684	0.289029	477.27	0.152594
2013	北京市	994.44	630.8	153.02	0.4052	12.78	17101	7.3	48.53	1.14236	0.682709	297.62	0.128672
2013	天津市	276.8	88.5	308.87	0.19231	24.34	15353	17.5	69.22	0.796384	0.359134	123.03	0.0906308
2013	河北省	837.59	4679.05	4349.03	0.47745	331.04	9188	50.1	616.37	0.781959	0.387452	511.11	0.280878
2013	山西省	412.38	5475.69	1382.79	0.36291	121.02	7949	45.6	99.78	1.15223	0.19987	339.69	0.131449
2013	内蒙古自治区	274.69	11876.3	2957.76	0.49524	202.42	8985	32.9	59.56	2.28039	0.205201	466.58	0.184501
2013	辽宁省	622.65	4520.39	1407.84	0.60222	151.76	10161	20.9	394.78	1.57844	0.49764	466.52	0.19465
2013	吉林省	266.44	1546.89	1510.13	0.35526	216.79	9781	23.5	48.23	2.06332	0.228406	318.26	0.117143
2013	黑龙江省	384.32	3609.73	5342.12	0.6935	244.96	9369	29.6	66.95	2.93074	0.181875	461.7	0.190867
2013	上海市	821.43	43	184.09	0.30357	10.78	19208	6.7	874.38	3.45763	0.347559	187.25	0.172488
2013	江苏省	1446.08	765.84	3785.27	0.39704	326.83	13521	29.6	1801.86	1.7246	0.476933	868.34	0.445873
2013	浙江省	1109.92	3645.59	1409.39	0.44208	92.43	17494	39.5	904.91	0.837645	0.846421	513.03	0.320425
2013	安徽省	483.01	1654.51	4305.53	0.28801	338.4	8850	42.9	138.39	1.52516	0.240291	478.17	0.199649
2013	福建省	574.84	3260.96	1122.42	0.5336	120.57	11405	28.7	346.68	1.30237	1.0369	312.22	0.198195
2013	江西省	317.95	5128.8	1995.6	0.57783	141.58	9089	48	90.9	2.79872	0.282368	438.54	0.16597
2013	山东省	1280.43	3477.46	4729.03	0.36307	472.66	10687	39.5	471.38	0.874158	0.415817	748.14	0.329351
2013	河南省	916.52	3236.74	4969.11	0.30409	696.37	8969	42.6	305.42	1.30821	0.268296	629.85	0.269253
2013	湖北省	587.4	5179.03	2791.41	0.38358	351.93	9692	29.4	130.14	1.89443	0.381775	465.34	0.210793
2013	湖南省	508.57	2998.96	3084.3	0.50883	248.19	9029	41	118.58	1.53712	0.323501	516.55	0.192354
2013	广东省	1902.91	1349.46	1770.76	0.39753	243.91	11068	23.4	1234.84	1.62899	0.706051	595.28	0.353382
2013	广西壮族自治区	275.47	1735.65	1586.37	0.25734	255.7	7793	41.1	68.38	1.79619	0.385685	371.9	0.142136
2013	海南省	72.61	56.6	260.93	0.56527	47.57	8802	28.9	9.63	1.5385	0.961449	139.03	0.0803839
2013	重庆市	359.23	2576.14	675.18	0.36987	96.64	8493	33	76.12	2.76799	0.287872	281.94	0.123967
2013	四川省	914.68	7792.14	2616.54	0.33558	251.14	8381	39.3	163.51	2.37073	0.354643	741.78	0.248668
2013	贵州省	181.62	5816.53	926.9	0.55275	97.42	5898	34.4	61.89	2.40482	0.191622	400.31	0.115974
2013	云南省	320.77	7393.81	1660.27	0.4535	219.02	6724	35.3	82.37	2.23056	0.2793	538.97	0.155762
2013	西藏自治区	11.43	725.99	239.27	0.40271	5.7	6553	46.9	1.08	0.436439	0.369402	148.79	0.0476311
2013	陕西省	417.45	6784.91	1209.94	0.47541	241.73	7092	32.3	113.01	1.67496	0.372083	419.62	0.161213
2013	甘肃省	180.15	7388.78	1284.08	0.51087	94.71	5589	40.5	50.36	1.56291	0.184743	346.58	0.115877
2013	青海省	39.02	794.41	186.9	0.35105	9.8	6462	35.9	4.5	1.35362	0.373536	159.69	0.0590444
2013	宁夏回族自治区	72.7	1709.44	498.56	0.53236	40.44	7599	35.4	13.84	1.43031	0.193709	149.38	0.0604784
2013	新疆维吾尔自治区	273.49	992.85	4769.89	0.69157	203.22	7847	23.3	83.92	2.19057	0.290612	387.42	0.141559
2012	北京市	923.09	602.8	207.54	0.66433	13.67	15365	6.5	47.31	1.15317	0.540949	222.69	0.109819
2012	天津市	238.16	54.24	337.04	0.62275	24.45	13593	17.1	51.62	0.790277	0.329413	100.98	0.0733736
2012	河北省	766.16	6411.51	4603.07	0.56689	329.33	8158	49.8	593.94	0.79231	0.361378	443.62	0.261198
2012	山西省	384.65	5290.62	1319.06	0.50977	118.28	7064	45.8	94.95	1.20946	0.182537	309.63	0.121313
2012	内蒙古自治区	247.74	11574.6	3125.24	0.6607	189.04	7956	31.7	55.15	2.33827	0.189445	450.83	0.172352
2012	辽宁省	402.42	6678.1	1698.82	0.79572	146.9	9061	20.2	373.44	1.62079	0.476566	405.02	0.190235
2012	吉林省	232.54	3691.32	1851.87	0.34497	206.73	8741	23.8	46.12	2.12631	0.226713	291.3	0.124088
2012	黑龙江省	344.15	4979.77	4776.48	0.3412	240.28	8367	30	64.33	3.0595	0.154914	430.39	0.185168
2012	上海市	820.64	43	199.02	0.56463	10.99	17452	7	208.98	3.56285	0.331889	217.97	0.119946
2012	江苏省	1301.28	1191.92	3929.72	0.53104	330.95	12133	28.7	1696.41	1.79594	0.44924	754.09	0.426461
2012	浙江省	819.88	2515.46	1471.02	0.45724	92.15	15806	39.8	869.87	0.841837	0.780562	408.2	0.290431
2012	安徽省	453.61	2245.01	3585.09	0.48226	333.53	7826	42.5	128.8	1.58168	0.223686	430.47	0.180242
2012	福建省	384.78	1485.39	968.51	0.54426	120.87	10164	27.3	312.85	1.36869	0.95632	244.16	0.169789
2012	江西省	271.72	4822.4	1907.06	0.59065	141.26	8103	48.5	84.62	1.21679	0.265222	384.77	0.144299
2012	山东省	967.75	4781.26	5058.11	0.31362	476.26	9506	39.2	465.79	0.874588	0.386494	673.82	0.315095
2012	河南省	841.13	4510.86	5205.63	0.23466	684.43	7963	42.2	290.03	1.32321	0.253995	551.73	0.259847
2012	湖北省	533.31	4760.38	2548.91	0.44574	354.89	8582	28.1	112.26	2.00002	0.355643	419.02	0.191369
2012	湖南省	465.11	2857.3	2715.78	0.51309	249.11	8024	39.1	110.23	1.59939	0.321834	447.74	0.176317
2012	广东省	1290.86	1428.62	1874.44	0.47028	245.38	9999	23.6	1187.5	1.70163	0.654006	539.56	0.323583
2012	广西壮族自治区	238.26	2019.54	1541.29	0.52957	249.04	6894	41.3	63.31	1.88871	0.359898	369.07	0.130706
2012	海南省	60.27	38.72	256.75	0.63636	45.53	7816	28.6	8.59	1.63985	0.891211	123.62	0.0734443
2012	重庆市	331.03	2439.97	702.97	0.55254	96.02	7526	33	73.8	2.85741	0.26874	256.35	0.112674
2012	四川省	819.53	6744.39	2662.65	0.42165	253.03	7432	38.5	155.96	2.52288	0.343245	654.95	0.229742
2012	贵州省	150.22	3513.55	1214.57	0.40712	98.17	5159	35.1	54.46	2.46886	0.171639	361.87	0.103732
2012	云南省	271.3	6175.57	1677.9	0.36805	210.21	5930	35.2	73.78	2.32188	0.25037	518.6	0.143247
2012	西藏自治区	9.54	42.84	251.04	0.47917	4.99	5698	47.1	1.02	0.473685	0.350981	142.62	0.0412831
2012	陕西省	365.33	9512.32	1277.18	0.36903	239.8	6285	32.6	142.49	1.7798	0.328126	376.45	0.16523
2012	甘肃省	158.77	8244.68	1297.58	0.48067	92.13	4931	39.5	47.85	1.65448	0.166203	302.37	0.112578
2012	青海省	32.4	856.5	251.67	0.56359	9.3	5594	30.6	4.46	1.27408	0.319193	134.31	0.0490997
2012	宁夏回族自治区	62.69	1851.24	491.35	0.39723	39.44	6776	35	12.75	1.49433	0.169322	139.8	0.0587735
2012	新疆维吾尔自治区	235.56	541.9	4029.07	0.54983	192.7	6876	23.2	75.81	2.37354	0.267368	365.39	0.126781
2011	北京市	820.91	579.8	209.33	0.32799	13.84	13742	6.7	45.4	1.12602	0.457103	187.34	0.104276
2011	天津市	211.74	51.58	338	0.39506	24.39	11941	16.4	51.3	0.757789	0.318906	91.78	0.0688915
2011	河北省	732.89	6351.47	4596.61	0.38177	326.28	7187	49.8	559.22	0.7999	0.338583	366.1	0.247775
2011	山西省	364.67	5560.62	1319.85	0.53675	114.57	6225	44.1	86.6	1.26205	0.166793	241.45	0.112643
2011	内蒙古自治区	229.78	11219.3	3072.39	0.44618	176.94	6942	32.3	52.3	2.37637	0.173712	391.68	0.165692
2011	辽宁省	376.26	6486.51	1588.38	0.3845	144.64	8011	19.1	366.33	1.66571	0.441097	329.2	0.18023
2011	吉林省	223.36	3639.15	1807.52	0.35967	195.2	7634	22.1	42.51	2.24932	0.21515	255.57	0.115166
2011	黑龙江省	317.79	4838.77	4332.65	0.4441	228.44	7382	28.8	58.24	3.35532	0.125669	355.98	0.166399
2011	上海市	753.11	41	199.61	0.3786	11.97	15737	12.9	204.28	3.97455	0.309978	161.54	0.119796
2011	江苏省	1200.02	1110.23	3817.92	0.32235	337.21	10744	28.6	1606.83	1.8286	0.406396	618.13	0.383442
2011	浙江省	730.67	2457.64	1456.8	0.36952	92.07	14197	36.3	848	0.921418	0.687041	373.32	0.262404
2011	安徽省	432.3	2180.33	3547.65	0.1507	329.67	6811	41.7	117.28	1.6603	0.205612	351.87	0.17127
2011	福建省	350.38	1493.12	967.48	0.36289	120.93	8952	27.6	270.58	1.5022	0.82178	207.89	0.153983
2011	江西省	252.23	4626.8	1867.67	0.39682	140.77	7133	49.4	77.26	1.32056	0.245799	287.99	0.1362
2011	山东省	890.31	4722.49	4986.88	0.1963	473.64	8395	39.2	456.52	0.891274	0.362548	564	0.291001
2011	河南省	839.82	4412.59	5150.44	0.25731	673.71	6989	44.1	281.82	1.36683	0.238017	480.48	0.24186
2011	湖北省	501.82	4832.72	2455.69	0.30632	354.89	7540	28	112.26	2.08751	0.337855	376.23	0.18061
2011	湖南省	443.53	2906.91	2762.41	0.40214	242.49	7082	38.3	106.03	1.65696	0.306894	394.26	0.166955
2011	广东省	1219.06	1418.72	1873.16	0.2358	241.3	8889	24.1	1134.92	1.75778	0.615964	420.34	0.302661
2011	广西壮族自治区	212.65	1952.08	1529.24	0.44377	242.71	6003	41.5	56.18	1.94513	0.34699	314.86	0.122409
2011	海南省	53.75	37.74	247.51	0.38328	47.73	6801	26.9	7.07	1.76085	0.832566	105.63	0.0714745
2011	重庆市	311.81	2376.69	692.88	0.34375	95.58	6605	33.1	70.37	2.82889	0.249645	198.91	0.106142
2011	四川省	778.7	6536.19	2600.75	0.4716	251.23	6505	38.2	148.57	2.68976	0.314734	545.7	0.209416
2011	贵州省	131.81	3249.82	1201.19	0.53058	94.08	4499	35.2	47.99	2.69963	0.145435	278.47	0.0923097
2011	云南省	241.1	5866.84	1634.24	0.38873	200.47	5170	35	66.78	2.46726	0.219587	409.8	0.129833
2011	西藏自治区	7.6	42.3	245.31	0.22472	4.79	4886	48	0.87	0.511895	0.327794	126.53	0.0430672
2011	陕西省	343.72	9407.09	1274.34	0.38348	207.27	5484	36.1	131.32	1.92116	0.295093	333.79	0.155299
2011	甘肃省	140.93	8096.76	1291.82	0.5619	87.24	4278	39.8	45.05	1.76661	0.14792	237.66	0.104693
2011	青海省	27.89	840.82	251.67	0.14816	8.27	4806	32.3	4.07	1.25392	0.287196	104.74	0.0511564
2011	宁夏回族自治区	55.34	1910.04	477.59	0.35427	38.24	5931	35.1	12.01	1.56851	0.152518	112.19	0.0560012
2011	新疆维吾尔自治区	203.62	458.73	3884.57	0.82739	183.68	5853	24.2	71.65	2.49092	0.242994	297.59	0.111645

## Sheet: Digital finance data
行政区划	year	TI	CB	UD	DL
北京	2022	4.5748	4.239	5.3378	4.2897
北京	2021	4.3758	4.1034	4.8959	4.3218
北京	2020	4.1788	3.97	4.4583	4.3602
北京	2019	3.99	3.8466	4.0207	4.4083
北京	2018	3.6854	3.5387	3.6678	4.2019
北京	2017	3.2994	3.1612	3.5724	3.2602
北京	2016	2.8637	2.8565	2.6374	3.299
北京	2015	2.7638	2.6839	2.3417	3.7948
北京	2014	2.3536	2.4392	2.1989	2.3522
北京	2013	2.1562	1.9386	2.475	2.2957
北京	2012	1.5065	1.5556	1.5942	1.1847
北京	2011	0.7941	0.9753	0.7223	0.3259
天津	2022	3.9791	3.7599	4.2616	4.2415
天津	2021	3.7923	3.5768	3.9969	4.1608
天津	2020	3.6146	3.4029	3.7391	4.0874
天津	2019	3.4411	3.2386	3.4901	4.0211
天津	2018	3.1688	2.9535	3.1794	3.861
天津	2017	2.8403	2.579	3.1013	3.2291
天津	2016	2.4584	2.2541	2.3161	3.3915
天津	2015	2.3753	2.1189	1.9546	3.9862
天津	2014	2.0016	1.9386	1.8028	2.5711
天津	2013	1.7526	1.4654	1.9752	2.2967
天津	2012	1.2296	1.1061	1.3577	1.4044
天津	2011	0.6058	0.6937	0.5333	0.4472
河北	2022	3.5967	3.4528	3.6139	4.0187
河北	2021	3.4099	3.2468	3.3956	3.9684
河北	2020	3.227	3.041	3.1842	3.9192
河北	2019	3.0506	2.8439	2.9733	3.8738
河北	2018	2.8277	2.6406	2.6792	3.7155
河北	2017	2.5817	2.3289	2.7345	3.1387
河北	2016	2.1436	1.9155	1.9687	3.2146
河北	2015	1.9953	1.7278	1.5145	3.752
河北	2014	1.6076	1.4997	1.3134	2.4986
河北	2013	1.4498	1.0566	1.6285	2.4235
河北	2012	0.8932	0.6546	1.0815	1.339
河北	2011	0.3242	0.1846	0.4419	0.5715
山西	2022	3.6025	3.7258	3.1862	3.9996
山西	2021	3.4291	3.4957	3.0498	3.9123
山西	2020	3.2573	3.2729	2.9137	3.8304
山西	2019	3.0873	3.0561	2.7789	3.7507
山西	2018	2.8365	2.7703	2.4973	3.6719
山西	2017	2.5995	2.4302	2.5498	3.2492
山西	2016	2.2481	2.0551	1.8938	3.5296
山西	2015	2.063	1.8614	1.4152	3.9057
山西	2014	1.6766	1.6316	1.2478	2.6043
山西	2013	1.4422	1.154	1.3908	2.4875
山西	2012	0.9298	0.752	0.8648	1.635
山西	2011	0.3341	0.2894	0.2161	0.6957
内蒙古	2022	3.4228	3.497	3.0764	3.7712
内蒙古	2021	3.2538	3.2956	2.9147	3.7211
内蒙古	2020	3.0939	3.104	2.7566	3.674
内蒙古	2019	2.9389	2.9145	2.6031	3.6298
内蒙古	2018	2.7157	2.6949	2.3231	3.4976
内蒙古	2017	2.585	2.3892	2.492	3.401
内蒙古	2016	2.2993	2.02	1.8489	4.04
内蒙古	2015	2.1455	1.8534	1.3604	4.5366
内蒙古	2014	1.7256	1.6546	1.1488	3.0084
内蒙古	2013	1.4659	1.1637	1.3884	2.6045
内蒙古	2012	0.9168	0.7503	0.9544	1.3978
内蒙古	2011	0.2889	0.2465	0.3027	0.4035
辽宁	2022	3.5826	3.3801	3.8032	3.8479
辽宁	2021	3.422	3.2213	3.5419	3.8527
辽宁	2020	3.2629	3.0711	3.2812	3.8633
辽宁	2019	3.1101	2.9244	3.0252	3.8777
辽宁	2018	2.9095	2.7181	2.7948	3.7501
辽宁	2017	2.6718	2.3987	2.9127	3.1357
辽宁	2016	2.3141	2.0774	2.2006	3.3021
辽宁	2015	2.264	1.9417	1.7841	4.2006
辽宁	2014	1.8761	1.7549	1.6289	2.7253
辽宁	2013	1.6007	1.2667	1.8154	2.3133
辽宁	2012	1.0353	0.8901	1.2036	1.2091
辽宁	2011	0.4329	0.4496	0.4464	0.3533
吉林	2022	3.4001	3.233	3.4401	3.9879
吉林	2021	3.2413	3.0667	3.2032	3.9186
吉林	2020	3.0826	2.9078	2.9763	3.8529
吉林	2019	2.9277	2.7575	2.7593	3.7962
吉林	2018	2.7608	2.5655	2.5523	3.7846
吉林	2017	2.5476	2.2745	2.7362	3.1072
吉林	2016	2.1707	1.9194	2.0414	3.2359
吉林	2015	2.082	1.7549	1.5468	4.1347
吉林	2014	1.6562	1.5491	1.3601	2.5475
吉林	2013	1.3836	1.0685	1.4795	2.2497
吉林	2012	0.8723	0.6943	0.9383	1.3399
吉林	2011	0.2451	0.2375	0.2404	0.2786
黑龙江	2022	3.3303	3.2084	3.3433	3.7659
黑龙江	2021	3.1937	3.0531	3.1363	3.7807
黑龙江	2020	3.0608	2.9048	2.9369	3.8009
黑龙江	2019	2.9287	2.7579	2.7464	3.8241
黑龙江	2018	2.7473	2.5612	2.5488	3.7228
黑龙江	2017	2.5678	2.26	2.7586	3.2377
黑龙江	2016	2.2189	1.9124	2.0654	3.5097
黑龙江	2015	2.0993	1.7468	1.6406	4.0972
黑龙江	2014	1.678	1.5248	1.4248	2.6441
黑龙江	2013	1.414	1.0449	1.5258	2.4297
黑龙江	2012	0.8791	0.6648	1.0046	1.3589
黑龙江	2011	0.3358	0.2112	0.3628	0.6983
上海	2022	4.7579	4.3149	5.8765	4.2757
上海	2021	4.5375	4.1291	5.3776	4.3863
上海	2020	4.3193	3.952	4.8868	4.5008
上海	2019	4.1028	3.7825	4.3991	4.6223
上海	2018	3.7773	3.4633	4.004	4.4026
上海	2017	3.3665	3.0589	3.9605	3.3031
上海	2016	2.8222	2.7425	2.8148	3.0994
上海	2015	2.7811	2.5898	2.5981	3.7454
上海	2014	2.3953	2.3702	2.4278	2.4188
上海	2013	2.2214	1.8731	2.8093	2.303
上海	2012	1.5077	1.4935	1.7472	1.1194
上海	2011	0.8019	0.9885	0.8624	0.0758
江苏	2022	4.2117	4.0493	4.5616	4.2167
江苏	2021	4.0138	3.8313	4.2537	4.2125
江苏	2020	3.8161	3.6211	3.9501	4.217
江苏	2019	3.6193	3.415	3.655	4.2292
江苏	2018	3.3402	3.1195	3.3309	4.0862
江苏	2017	2.9769	2.7232	3.2893	3.2469
江苏	2016	2.5375	2.3322	2.5308	3.228
江苏	2015	2.4401	2.1594	2.1862	3.8284
江苏	2014	2.0416	1.9318	2.0109	2.4602
江苏	2013	1.8098	1.4468	2.2309	2.243
江苏	2012	1.2203	1.0669	1.5655	1.0994
江苏	2011	0.6208	0.667	0.7922	0.1571
浙江	2022	4.4719	4.2314	5.1035	4.1361
浙江	2021	4.2685	4.0249	4.7445	4.2134
浙江	2020	4.0688	3.8207	4.3925	4.2998
浙江	2019	3.8749	3.624	4.0465	4.3916
浙江	2018	3.5745	3.3017	3.7201	4.2107
浙江	2017	3.1805	2.9006	3.664	3.2266
浙江	2016	2.681	2.5444	2.7062	3.0866
浙江	2015	2.6485	2.3933	2.5129	3.7377
浙江	2014	2.2445	2.1748	2.3367	2.3071
浙江	2013	2.0577	1.6796	2.6548	2.2212
浙江	2012	1.4635	1.285	2.0042	1.0707
浙江	2011	0.7739	0.8553	0.9352	0.2122
安徽	2022	3.9134	3.6968	4.1664	4.1366
安徽	2021	3.7037	3.4656	3.9114	4.1098
安徽	2020	3.5016	3.2375	3.6615	4.0838
安徽	2019	3.3029	3.0115	3.4153	4.0611
安徽	2018	3.0383	2.7341	3.0962	3.9379
安徽	2017	2.716	2.347	3.0955	3.2448
安徽	2016	2.2878	1.9489	2.2995	3.3854
安徽	2015	2.1128	1.7165	1.8978	3.8123
安徽	2014	1.8059	1.5656	1.7384	2.7222
安徽	2013	1.5083	1.0651	1.9086	2.2445
安徽	2012	0.9663	0.6606	1.3806	1.2231
安徽	2011	0.3307	0.202	0.5558	0.3466
福建	2022	4.2096	3.9893	4.7974	3.9125
福建	2021	4.0026	3.7876	4.4074	4.0027
福建	2020	3.8013	3.5921	4.018	4.0982
福建	2019	3.6051	3.4065	3.6373	4.2025
福建	2018	3.3444	3.1231	3.343	4.0776
福建	2017	2.9928	2.754	3.3433	3.1447
福建	2016	2.5267	2.4047	2.4512	3.067
福建	2015	2.4521	2.266	1.9823	3.9201
福建	2014	2.0259	2.0422	1.6485	2.6576
福建	2013	1.831	1.5743	1.9412	2.4785
福建	2012	1.2321	1.1274	1.4025	1.2679
福建	2011	0.6176	0.6328	0.6851	0.445
江西	2022	3.861	3.6146	4.22	3.9505
江西	2021	3.6296	3.3839	3.8735	3.9644
江西	2020	3.4061	3.1614	3.5323	3.9852
江西	2019	3.1913	2.9432	3.1918	4.0097
江西	2018	2.9623	2.6646	2.9652	3.94
江西	2017	2.6717	2.2852	3.0592	3.2438
江西	2016	2.2376	1.8879	2.2274	3.4108
江西	2015	2.0835	1.7086	1.8248	3.7914
江西	2014	1.7569	1.4873	1.6719	2.8018
江西	2013	1.4613	0.9981	1.8373	2.3078
江西	2012	0.9193	0.5982	1.3268	1.2392
江西	2011	0.2974	0.1397	0.5482	0.3621
山东	2022	3.8983	3.7671	3.9439	4.2555
山东	2021	3.6844	3.5408	3.6849	4.1725
山东	2020	3.4781	3.3166	3.4349	4.09
山东	2019	3.2736	3.0997	3.1854	4.0084
山东	2018	3.0113	2.8199	2.8785	3.8848
山东	2017	2.7206	2.4719	2.9092	3.1992
山东	2016	2.3257	2.098	2.1781	3.3458
山东	2015	2.2066	1.9211	1.7815	3.9216
山东	2014	1.8188	1.6989	1.6119	2.5908
山东	2013	1.593	1.2201	1.8907	2.2832
山东	2012	1.0035	0.8015	1.2753	1.1768
山东	2011	0.3855	0.3367	0.4716	0.3901
河南	2022	3.8015	3.7602	3.614	4.2335
河南	2021	3.6018	3.5357	3.4104	4.1573
河南	2020	3.4081	3.3116	3.2121	4.0832
河南	2019	3.2212	3.0934	3.0185	4.0116
河南	2018	2.9576	2.7846	2.7574	3.8927
河南	2017	2.6692	2.4145	2.7956	3.2809
河南	2016	2.2312	2.0065	1.9922	3.408
河南	2015	2.0534	1.815	1.5105	3.8273
河南	2014	1.6665	1.5752	1.3224	2.5931
河南	2013	1.4208	1.0506	1.5523	2.4042
河南	2012	0.8368	0.6193	0.9807	1.2937
河南	2011	0.284	0.1354	0.3811	0.5981
湖北	2022	3.888	3.6837	4.131	4.0689
湖北	2021	3.7369	3.5234	3.9088	4.0917
湖北	2020	3.5864	3.3654	3.6958	4.1173
湖北	2019	3.444	3.2079	3.4853	4.1489
湖北	2018	3.1948	2.9256	3.2244	4.0299
湖北	2017	2.8528	2.5363	3.1758	3.311
湖北	2016	2.3986	2.1555	2.3341	3.3183
湖北	2015	2.2675	1.9953	1.8908	3.8507
湖北	2014	1.9014	1.7661	1.757	2.6107
湖北	2013	1.6476	1.2374	1.9704	2.4151
湖北	2012	1.0142	0.8206	1.2584	1.21
湖北	2011	0.3982	0.3517	0.5356	0.3018
湖南	2022	3.7562	3.4322	4.2003	4.015
湖南	2021	3.5367	3.2248	3.8336	4.0167
湖南	2020	3.3203	3.0228	3.4744	4.023
湖南	2019	3.1085	2.8228	3.1181	4.0346
湖南	2018	2.8681	2.5807	2.8655	3.8219
湖南	2017	2.6112	2.2347	2.977	3.1896
湖南	2016	2.1769	1.8613	2.198	3.1807
湖南	2015	2.0638	1.7007	1.7447	3.8424
湖南	2014	1.6727	1.5042	1.5346	2.4799
湖南	2013	1.4771	1.0346	1.75	2.4425
湖南	2012	0.9371	0.6339	1.3238	1.2356
湖南	2011	0.3268	0.1533	0.6073	0.3902
广东	2022	4.1834	3.9168	4.8544	3.8429
广东	2021	3.9884	3.7413	4.4468	3.9664
广东	2020	3.7953	3.5694	4.0435	4.0906
广东	2019	3.6061	3.3998	3.645	4.2166
广东	2018	3.3192	3.1244	3.2993	3.9986
广东	2017	2.9617	2.7591	3.2817	3.0492
广东	2016	2.48	2.4007	2.365	2.9507
广东	2015	2.4095	2.2552	1.9587	3.7379
广东	2014	2.0153	1.9963	1.7504	2.5598
广东	2013	1.8478	1.5333	2.0844	2.4561
广东	2012	1.2706	1.1137	1.4938	1.3831
广东	2011	0.6948	0.6341	0.8097	0.6866
广西	2022	3.5715	3.4596	3.5601	3.9344
广西	2021	3.4066	3.2883	3.3421	3.9157
广西	2020	3.2517	3.1198	3.1324	3.9041
广西	2019	3.0991	2.9526	2.9248	3.9001
广西	2018	2.8925	2.7041	2.7249	3.8193
广西	2017	2.6194	2.3273	2.7952	3.2644
广西	2016	2.2332	1.9351	2.0221	3.6015
广西	2015	2.0723	1.7633	1.5346	4.0694
广西	2014	1.6612	1.5429	1.3998	2.5266
广西	2013	1.4146	1.0697	1.5384	2.3282
广西	2012	0.8935	0.6647	1.0458	1.3725
广西	2011	0.3389	0.1998	0.4406	0.6133
海南	2022	3.7598	3.7027	3.8326	3.8099
海南	2021	3.5983	3.5274	3.6023	3.8182
海南	2020	3.4405	3.3587	3.3724	3.8346
海南	2019	3.2875	3.1941	3.1446	3.8558
海南	2018	3.0972	2.944	3.0023	3.7754
海南	2017	2.7564	2.5339	2.9753	3.0934
海南	2016	2.3156	2.1009	2.2035	3.2283
海南	2015	2.3033	1.9226	1.8491	4.3859
海南	2014	1.7962	1.7099	1.538	2.5503
海南	2013	1.5826	1.2175	1.7337	2.5139
海南	2012	1.0294	0.7951	1.2072	1.4798
海南	2011	0.4556	0.3096	0.5774	0.7163
重庆	2022	3.8567	3.6776	4.1254	3.9176
重庆	2021	3.6494	3.4813	3.7807	3.9418
重庆	2020	3.4476	3.2939	3.4391	3.9712
重庆	2019	3.2547	3.1103	3.1036	4.0062
重庆	2018	3.0153	2.8511	2.856	3.8474
重庆	2017	2.7631	2.495	3.0121	3.1957
重庆	2016	2.3389	2.1403	2.1154	3.401
重庆	2015	2.2184	1.9746	1.7158	3.9365
重庆	2014	1.8471	1.7557	1.5788	2.6363
重庆	2013	1.5986	1.2527	1.782	2.4074
重庆	2012	1.0002	0.8539	1.1614	1.1905
重庆	2011	0.4189	0.4038	0.4746	0.3677
四川	2022	3.7157	3.503	3.9727	3.9261
四川	2021	3.5315	3.304	3.7061	3.9399
四川	2020	3.3482	3.1076	3.4486	3.9605
四川	2019	3.1711	2.9122	3.1953	3.9823
四川	2018	2.943	2.6615	2.9583	3.8451
四川	2017	2.678	2.3187	3.0154	3.2514
四川	2016	2.2541	1.97	2.1654	3.3538
四川	2015	2.1548	1.8208	1.7654	3.9651
四川	2014	1.7382	1.6258	1.5982	2.3639
四川	2013	1.5304	1.1403	1.7671	2.3882
四川	2012	1.0013	0.7436	1.265	1.3731
四川	2011	0.4016	0.2902	0.5856	0.435
贵州	2022	3.3801	3.5506	2.8523	3.7661
贵州	2021	3.226	3.3408	2.713	3.7869
贵州	2020	3.0794	3.1324	2.582	3.8081
贵州	2019	2.9351	2.9266	2.4566	3.833
贵州	2018	2.7691	2.6739	2.4133	3.7301
贵州	2017	2.5146	2.2777	2.5844	3.1699
贵州	2016	2.0945	1.807	1.827	3.5303
贵州	2015	1.9329	1.6098	1.3274	4.1001
贵州	2014	1.5462	1.399	1.1408	2.769
贵州	2013	1.2122	0.8959	1.2546	2.1793
贵州	2012	0.7587	0.4987	0.8992	1.3621
贵州	2011	0.1847	0.0306	0.2751	0.5292
云南	2022	3.4988	3.3951	3.4759	3.8732
云南	2021	3.339	3.2074	3.2806	3.8725
云南	2020	3.1848	3.0246	3.0945	3.8778
云南	2019	3.0346	2.8443	2.9112	3.8874
云南	2018	2.8579	2.6229	2.7884	3.7606
云南	2017	2.5627	2.2354	2.8285	3.1608
云南	2016	2.1734	1.8537	2.0317	3.4865
云南	2015	2.0376	1.6796	1.5879	4.0367
云南	2014	1.6405	1.4722	1.443	2.5554
云南	2013	1.379	0.9559	1.5355	2.4915
云南	2012	0.8443	0.5278	1.1196	1.3891
云南	2011	0.2491	0.0747	0.4839	0.3981
西藏	2022	3.4601	3.2881	3.7284	3.4681
西藏	2021	3.2805	3.0923	3.458	3.5413
西藏	2020	3.1053	2.9018	3.1938	3.6167
西藏	2019	2.9379	2.7114	2.9321	3.6965
西藏	2018	2.7433	2.4982	2.6716	3.6833
西藏	2017	2.4557	2.0929	2.7379	3.141
西藏	2016	2.0473	1.6721	2.0253	3.3266
西藏	2015	1.8638	1.3987	1.5775	3.9197
西藏	2014	1.4391	1.2667	1.0876	2.647
西藏	2013	1.151	0.7409	1.1284	2.5465
西藏	2012	0.6853	0.3286	0.7107	1.8165
西藏	2011	0.1622	0.0337	0.3016	0.3333
陕西	2022	3.8076	3.7267	3.7901	4.1513
陕西	2021	3.6125	3.5085	3.5508	4.084
陕西	2020	3.4204	3.2953	3.3173	4.0211
陕西	2019	3.2289	3.0821	3.0914	3.9636
陕西	2018	2.9595	2.8105	2.7715	3.7931
陕西	2017	2.6685	2.4648	2.76	3.1747
陕西	2016	2.2937	2.1117	2.0287	3.376
陕西	2015	2.1612	1.9492	1.5795	3.9185
陕西	2014	1.7873	1.7325	1.39	2.69
陕西	2013	1.4837	1.236	1.4594	2.3455
陕西	2012	0.9824	0.8362	0.9861	1.4588
陕西	2011	0.4096	0.3781	0.2974	0.7174
甘肃	2022	3.3977	3.5265	2.9301	3.7669
甘肃	2021	3.2217	3.3044	2.7907	3.7171
甘肃	2020	3.055	3.0887	2.6535	3.6736
甘肃	2019	2.8914	2.8731	2.5174	3.6316
甘肃	2018	2.6682	2.6129	2.2752	3.5654
甘肃	2017	2.4378	2.2738	2.4039	3.041
甘肃	2016	2.0411	1.8928	1.7266	3.1024
甘肃	2015	1.9978	1.6967	1.2525	4.3464
甘肃	2014	1.5976	1.481	1.0729	2.936
甘肃	2013	1.2839	0.9677	1.142	2.586
甘肃	2012	0.7629	0.5472	0.6898	1.6079
甘肃	2011	0.1884	0.0499	0.1276	0.7561
青海	2022	3.3035	3.3071	2.8975	4.0218
青海	2021	3.1388	3.1122	2.7712	3.9086
青海	2020	2.9823	2.9206	2.6467	3.7958
青海	2019	2.8265	2.729	2.5275	3.6919
青海	2018	2.6312	2.5169	2.3531	3.5143
青海	2017	2.402	2.1567	2.5109	3.0142
青海	2016	2.0038	1.7773	1.8226	3.0811
青海	2015	1.9515	1.5959	1.365	4.1914
青海	2014	1.4593	1.3924	1.084	2.3623
青海	2013	1.1801	0.8818	1.1342	2.2482
青海	2012	0.6147	0.4712	0.5185	1.263
青海	2011	0.1833	0.0196	0.0676	0.9342
宁夏	2022	3.4739	3.6589	3.0715	3.6123
宁夏	2021	3.2823	3.4275	2.8445	3.6137
宁夏	2020	3.1002	3.2045	2.6272	3.6152
宁夏	2019	2.9231	2.9904	2.4155	3.6235
宁夏	2018	2.7292	2.7425	2.2527	3.5514
宁夏	2017	2.5559	2.4242	2.5221	3.0524
宁夏	2016	2.1236	2.0592	1.7962	2.9312
宁夏	2015	2.147	1.9035	1.3487	4.4018
宁夏	2014	1.6526	1.6718	1.1428	2.5155
宁夏	2013	1.3674	1.1508	1.2902	2.2232
宁夏	2012	0.8713	0.7678	0.9034	1.1546
宁夏	2011	0.3131	0.3227	0.2316	0.4296
新疆	2022	3.3832	3.4591	3.111	3.6277
新疆	2021	3.2318	3.2795	2.9226	3.6351
新疆	2020	3.0835	3.1022	2.7385	3.6488
新疆	2019	2.9434	2.9348	2.5631	3.663
新疆	2018	2.7184	2.6735	2.3294	3.5737
新疆	2017	2.4869	2.2882	2.491	3.1356
新疆	2016	2.0872	1.9032	1.9011	3.0331
新疆	2015	2.0549	1.7201	1.486	4.194
新疆	2014	1.6367	1.5128	1.3487	2.5691
新疆	2013	1.434	1.0144	1.4639	2.7648
新疆	2012	0.8245	0.6088	0.8514	1.4876
新疆	2011	0.2034	0.1292	0.236	0.3892

## Sheet: mediating variable
地区	时间	HLH	GJH
北京	2022	4.50061	2.4428
北京	2021	5.64968	2.47369
北京	2020	6.95687	2.50324
北京	2019	5.39676	2.49238
北京	2018	5.22906	2.46455
北京	2017	4.93319	2.43518
北京	2016	3.77737	2.36901
北京	2015	2.62543	2.25466
北京	2014	2.1651	2.16926
北京	2013	1.56385	2.05799
北京	2012	1.47777	2.02751
北京	2011	1.49114	2.00605
天津	2022	3.78704	2.09506
天津	2021	3.74522	2.10083
天津	2020	3.15	2.06789
天津	2019	2.52283	2.05486
天津	2018	2.63866	2.04867
天津	2017	1.50861	2.01306
天津	2016	1.56761	1.99724
天津	2015	1.55102	1.97542
天津	2014	1.58482	1.94976
天津	2013	1.69461	1.93725
天津	2012	1.66196	1.9313
天津	2011	1.81768	1.90557
河北	2022	3.31409	1.75803
河北	2021	3.54742	1.7773
河北	2020	3.41336	1.74886
河北	2019	3.00288	1.66862
河北	2018	2.30919	1.72658
河北	2017	2.27257	1.7366
河北	2016	2.63157	1.70807
河北	2015	2.79132	1.68351
河北	2014	2.80736	1.66526
河北	2013	2.82396	1.6439
河北	2012	2.86163	1.62964
河北	2011	2.91639	1.59983
山西	2022	2.774	1.54706
山西	2021	2.72267	1.56036
山西	2020	2.46669	1.50444
山西	2019	2.58386	1.50522
山西	2018	2.51116	1.49277
山西	2017	2.48028	1.49564
山西	2016	2.30474	1.44624
山西	2015	2.22682	1.41715
山西	2014	2.30389	1.41375
山西	2013	2.32145	1.41467
山西	2012	2.3363	1.40095
山西	2011	2.57335	1.40447
内蒙古	2022	1.98572	1.50897
内蒙古	2021	2.09459	1.46952
内蒙古	2020	2.20861	1.36711
内蒙古	2019	2.40122	1.36615
内蒙古	2018	2.7076	1.36788
内蒙古	2017	1.94959	1.6368
内蒙古	2016	2.21792	1.61026
内蒙古	2015	2.47637	1.58949
内蒙古	2014	2.81	1.57502
内蒙古	2013	2.97318	1.58097
内蒙古	2012	3.48628	1.57039
内蒙古	2011	3.76835	1.58587
辽宁	2022	2.79279	1.61386
辽宁	2021	2.72631	1.60539
辽宁	2020	2.61068	1.56796
辽宁	2019	2.93396	1.53792
辽宁	2018	2.82068	1.52384
辽宁	2017	2.6664	1.50448
辽宁	2016	2.4449	1.5175
辽宁	2015	1.8915	1.64007
辽宁	2014	1.59196	1.73263
辽宁	2013	1.56217	1.75324
辽宁	2012	1.48265	1.74459
辽宁	2011	1.59063	1.71988
吉林	2022	2.86115	1.47473
吉林	2021	2.67824	1.50726
吉林	2020	2.43046	1.47758
吉林	2019	2.34642	1.50808
吉林	2018	2.10081	1.54228
吉林	2017	1.00718	1.80053
吉林	2016	1.08386	1.77211
吉林	2015	1.12184	1.75061
吉林	2014	1.17484	1.73459
吉林	2013	1.21591	1.72165
吉林	2012	1.29353	1.70749
吉林	2011	1.40773	1.68042
黑龙江	2022	2.29718	1.41
黑龙江	2021	2.25425	1.39658
黑龙江	2020	2.16234	1.36461
黑龙江	2019	2.15331	1.3723
黑龙江	2018	2.08035	1.36687
黑龙江	2017	1.76049	1.51071
黑龙江	2016	1.83345	1.50495
黑龙江	2015	1.84465	1.50679
黑龙江	2014	1.7355	1.50407
黑龙江	2013	1.74733	1.51583
黑龙江	2012	1.80067	1.4993
黑龙江	2011	1.87015	1.49855
上海	2022	103.155	2.70248
上海	2021	185.587	2.68505
上海	2020	4186.56	2.63934
上海	2019	32.2654	2.59894
上海	2018	49.1282	2.5434
上海	2017	28.7493	2.50153
上海	2016	19.2847	2.44941
上海	2015	6.95604	2.32148
上海	2014	4.99718	2.25769
上海	2013	4.54434	2.18893
上海	2012	3.28728	2.12931
上海	2011	2.81779	2.08623
江苏	2022	4.02744	1.89506
江苏	2021	4.07377	1.89341
江苏	2020	4.10279	1.87744
江苏	2019	3.97805	1.86965
江苏	2018	3.38931	1.86139
江苏	2017	2.64548	1.88771
江苏	2016	2.72583	1.86683
江苏	2015	2.75253	1.8552
江苏	2014	2.63641	1.84248
江苏	2013	2.55962	1.82689
江苏	2012	2.52266	1.81124
江苏	2011	2.45175	1.80406
浙江	2022	6.15849	2.11288
浙江	2021	7.48144	2.13889
浙江	2020	6.49645	2.1148
浙江	2019	6.05299	2.08454
浙江	2018	5.84499	2.06437
浙江	2017	5.29761	2.03877
浙江	2016	4.26567	2.00854
浙江	2015	3.5195	1.97642
浙江	2014	3.03853	1.94948
浙江	2013	2.66816	1.91956
浙江	2012	2.47868	1.90267
浙江	2011	2.46688	1.88029
安徽	2022	3.58215	1.68258
安徽	2021	3.27933	1.68835
安徽	2020	3.00478	1.68535
安徽	2019	2.85847	1.6936
安徽	2018	2.5475	1.71009
安徽	2017	1.95476	1.76814
安徽	2016	1.94399	1.75112
安徽	2015	1.87268	1.73455
安徽	2014	1.82614	1.71686
安徽	2013	1.82691	1.69446
安徽	2012	1.83584	1.67624
安徽	2011	1.95154	1.63407
福建	2022	1.7799	1.90422
福建	2021	1.85789	1.90231
福建	2020	1.86142	1.88916
福建	2019	1.84864	1.89402
福建	2018	1.94965	1.8851
福建	2017	1.90685	1.87729
福建	2016	1.99943	1.86736
福建	2015	1.9993	1.86221
福建	2014	2.10181	1.85112
福建	2013	2.184	1.8387
福建	2012	2.18287	1.82324
福建	2011	2.15352	1.80794
江西	2022	2.64541	1.75091
江西	2021	2.62072	1.74403
江西	2020	2.50869	1.72487
江西	2019	2.38071	1.72182
江西	2018	2.29813	1.73232
江西	2017	1.90466	1.78673
江西	2016	1.9451	1.76962
江西	2015	1.91423	1.75937
江西	2014	1.89946	1.74189
江西	2013	1.98495	1.70863
江西	2012	2.05652	1.67348
江西	2011	2.23563	1.62024
山东	2022	3.05973	1.75566
山东	2021	3.26834	1.74783
山东	2020	3.2568	1.73358
山东	2019	3.0791	1.71778
山东	2018	2.49832	1.76356
山东	2017	1.827	1.83665
山东	2016	1.71095	1.84611
山东	2015	1.70542	1.83467
山东	2014	1.69231	1.82714
山东	2013	1.68564	1.82409
山东	2012	1.68024	1.82069
山东	2011	1.71293	1.80522
河南	2022	2.90807	1.67157
河南	2021	2.79196	1.65938
河南	2020	2.66751	1.6269
河南	2019	2.47585	1.65636
河南	2018	2.36338	1.6787
河南	2017	1.69457	1.79556
河南	2016	1.78561	1.77938
河南	2015	1.85705	1.7579
河南	2014	1.96555	1.7347
河南	2013	2.3233	1.71055
河南	2012	2.32234	1.68902
河南	2011	2.35456	1.67365
湖北	2022	2.46044	1.70022
湖北	2021	2.41593	1.69524
湖北	2020	2.23359	1.68696
湖北	2019	1.99573	1.73068
湖北	2018	1.92126	1.7283
湖北	2017	1.80246	1.73038
湖北	2016	1.55837	1.75552
湖北	2015	1.50943	1.74874
湖北	2014	1.51524	1.73467
湖北	2013	1.50936	1.71202
湖北	2012	1.57041	1.68494
湖北	2011	1.68914	1.65241
湖南	2022	2.08491	1.67279
湖南	2021	2.1027	1.66953
湖南	2020	2.04159	1.64663
湖南	2019	1.98973	1.67285
湖南	2018	1.87519	1.69514
湖南	2017	1.7241	1.71583
湖南	2016	1.80496	1.69804
湖南	2015	1.76055	1.69142
湖南	2014	1.81355	1.67217
湖南	2013	1.86141	1.6551
湖南	2012	1.95251	1.62481
湖南	2011	1.95238	1.60931
广东	2022	7.40438	2.11212
广东	2021	8.37969	2.12622
广东	2020	8.11802	2.11391
广东	2019	6.45875	2.08837
广东	2018	5.14521	2.05505
广东	2017	4.32007	2.02283
广东	2016	3.7746	1.98604
广东	2015	3.33438	1.95385
广东	2014	3.11972	1.92891
广东	2013	3.06932	1.90551
广东	2012	3.16002	1.8792
广东	2011	2.8383	1.86717
广西	2022	2.84371	1.56585
广西	2021	2.95249	1.5371
广西	2020	2.95558	1.49286
广西	2019	3.05494	1.50314
广西	2018	2.80006	1.55527
广西	2017	2.07554	1.63049
广西	2016	2.13236	1.59909
广西	2015	2.00097	1.59233
广西	2014	2.09942	1.57695
广西	2013	2.1366	1.56084
广西	2012	2.19819	1.54219
广西	2011	2.34982	1.51982
海南	2022	1.67305	1.31312
海南	2021	1.64351	1.32182
海南	2020	1.63256	1.30712
海南	2019	1.62647	1.29422
海南	2018	1.6457	1.30246
海南	2017	1.67422	1.28248
海南	2016	1.72466	1.25785
海南	2015	1.6852	1.26247
海南	2014	1.71186	1.25569
海南	2013	1.7562	1.26801
海南	2012	2.03006	1.25148
海南	2011	2.24279	1.21994
重庆	2022	2.43684	1.6758
重庆	2021	2.3113	1.66496
重庆	2020	2.18985	1.6422
重庆	2019	2.21084	1.66835
重庆	2018	2.18127	1.68287
重庆	2017	2.14121	1.68756
重庆	2016	2.11388	1.70556
重庆	2015	2.08492	1.70223
重庆	2014	2.05535	1.68398
重庆	2013	2.07008	1.65414
重庆	2012	2.08601	1.6192
重庆	2011	2.12211	1.5827
四川	2022	2.51883	1.67281
四川	2021	2.54278	1.66628
四川	2020	2.49538	1.63636
四川	2019	2.4217	1.67089
四川	2018	2.3865	1.67098
四川	2017	2.05624	1.69568
四川	2016	2.10968	1.66938
四川	2015	2.08093	1.65218
四川	2014	2.06807	1.65312
四川	2013	2.06343	1.63955
四川	2012	2.19021	1.61298
四川	2011	2.05064	1.64078
贵州	2022	2.95515	1.35536
贵州	2021	2.65855	1.41384
贵州	2020	2.63159	1.46337
贵州	2019	2.85095	1.47474
贵州	2018	2.98383	1.47866
贵州	2017	2.90838	1.48158
贵州	2016	2.66486	1.49715
贵州	2015	2.79659	1.48039
贵州	2014	2.57885	1.49054
贵州	2013	2.32705	1.49481
贵州	2012	2.41308	1.4592
贵州	2011	2.13554	1.48198
云南	2022	3.11349	1.25511
云南	2021	3.32307	1.36457
云南	2020	2.90443	1.4501
云南	2019	2.52347	1.49027
云南	2018	2.32033	1.52007
云南	2017	2.236	1.51147
云南	2016	2.18683	1.5031
云南	2015	2.04428	1.49929
云南	2014	2.02842	1.48343
云南	2013	2.03664	1.47465
云南	2012	2.03543	1.47798
云南	2011	2.14648	1.46567
西藏	2022	2.40836	1.37754
西藏	2021	2.47931	1.3993
西藏	2020	2.27171	1.37105
西藏	2019	2.61039	1.36056
西藏	2018	2.49364	1.35268
西藏	2017	2.37116	1.34608
西藏	2016	2.34612	1.3495
西藏	2015	2.35069	1.34465
西藏	2014	2.85781	1.35322
西藏	2013	2.86845	1.34676
西藏	2012	2.85631	1.34253
西藏	2011	3.0041	1.35858
陕西	2022	2.73223	1.56155
陕西	2021	2.55844	1.57081
陕西	2020	2.49013	1.56411
陕西	2019	1.90038	1.63332
陕西	2018	1.73191	1.63745
陕西	2017	1.71809	1.63547
陕西	2016	1.67146	1.61063
陕西	2015	1.57705	1.58177
陕西	2014	1.56799	1.54574
陕西	2013	1.53309	1.52311
陕西	2012	1.50957	1.49437
陕西	2011	3.09052	1.47748
甘肃	2022	3.76957	1.28551
甘肃	2021	3.4996	1.31572
甘肃	2020	3.63302	1.34076
甘肃	2019	4.50351	1.33375
甘肃	2018	4.64616	1.34294
甘肃	2017	4.19193	1.37032
甘肃	2016	3.32548	1.44726
甘肃	2015	3.08257	1.4353
甘肃	2014	2.92324	1.43935
甘肃	2013	3.06772	1.42377
甘肃	2012	3.2451	1.40426
甘肃	2011	3.68966	1.35967
青海	2022	1.50261	1.25072
青海	2021	1.45738	1.29651
青海	2020	1.67242	1.35317
青海	2019	2.14731	1.38152
青海	2018	2.14716	1.51515
青海	2017	2.48667	1.43757
青海	2016	2.32251	1.50493
青海	2015	2.22457	1.47097
青海	2014	2.27391	1.41176
青海	2013	2.27783	1.36361
青海	2012	2.32723	1.41822
青海	2011	2.47884	1.31081
宁夏	2022	2.23766	1.53726
宁夏	2021	1.95137	1.529
宁夏	2020	1.88388	1.48079
宁夏	2019	2.04276	1.51996
宁夏	2018	2.11645	1.52115
宁夏	2017	1.92662	1.65234
宁夏	2016	1.94987	1.63712
宁夏	2015	2.12217	1.61118
宁夏	2014	2.19486	1.59468
宁夏	2013	2.16024	1.54844
宁夏	2012	2.52481	1.56353
宁夏	2011	2.08091	1.51089
新疆	2022	1.78501	1.3129
新疆	2021	1.66728	1.31055
新疆	2020	1.67051	1.31637
新疆	2019	1.8323	1.31626
新疆	2018	2.03481	1.31567
新疆	2017	2.01834	1.35264
新疆	2016	2.18379	1.34574
新疆	2015	2.24884	1.32436
新疆	2014	2.39758	1.30673
新疆	2013	2.47155	1.29651
新疆	2012	2.62066	1.28293
新疆	2011	2.58772	1.28705

## Sheet: heterogeneity
时间	地区	zon	zon1	zon2	zon3	GAS	HC	ES	RINF	MA	地区2	year	行政区划	TI	CB	UD	DL	v1	v2	v3	v4	v5	v6	v7	v8	v9	v10	v11	v12	v13	v14	v15	v16	v17	id	w1	w2	w3	w4	w5	w6	w7	w8	w9	w10	w11	w12	w13	w14
2022	北京	41540.9	111.5	6635.6	34793.7	0.0619602	8.373	0.989594	10.0152	6.44794	北京	2022	北京	4.5748	4.239	5.3378	4.2897	34754	23745	112.14	0.3587	1.18714	6.61	111.5	8565.86	19.6	0.786454	990.99	2758.49	62.66	462.79	202722	74.6	60.63	北京	0.0392159	0.030727	0.0712418	0.0143319	0.0228296	0.00930875	0.060374	0.0591401	0.0165325	0.0612724	0.066526	0.0711679	0.0457619	0.0380191
2021	北京	41045.6	111.4	7389	33545.2	0.0690995	8.355	0.989028	10.0132	6.55664	北京	2021	北京	4.3758	4.1034	4.8959	4.3218	33303	23574	109.32	0.1	0.971959	6.3	111.4	8268.2	19.2	0.96224	977.98	2526.93	61.7	497.87	198778	93	66.88	北京	0.0392159	0.030727	0.0712418	0.0143319	0.0228296	0.00930875	0.060374	0.0591401	0.0165325	0.0612724	0.066526	0.0711679	0.0457619	0.0380191
2020	北京	35943.3	108.3	5739.1	30095.9	0.0698872	8.171	0.966361	10.0107	6.49587	北京	2020	北京	4.1788	3.97	4.4583	4.3602	30126	20913	109.35	0.875	0.816669	6.06	108.3	7881.99	20.1	1.12752	928.69	2302.91	60.89	497.33	162824	94.4	65.28	北京	0.0392159	0.030727	0.0712418	0.0143319	0.0228296	0.00930875	0.060374	0.0591401	0.0165325	0.0612724	0.066526	0.0711679	0.0457619	0.0380191
2019	北京	35445.1	114.4	5667.4	29663.4	0.0789154	8.169	1.01697	10.0153	5.8999	北京	2019	北京	3.99	3.8466	4.0207	4.4083	28928	21881	109.24	0.08	0.720856	6.17	114.38	7712.31	17.4	1.32016	901.57	2076.45	60.15	584.62	131716	61.8	67.77	北京	0.0392159	0.030727	0.0712418	0.0143319	0.0228296	0.00930875	0.060374	0.0591401	0.0165325	0.0612724	0.066526	0.0711679	0.0457619	0.0380191
2018	北京	33106	120.6	5477.4	27508.1	0.077099	8.115	1.04903	10.0104	5.63515	北京	2018	北京	3.6854	3.5387	3.6678	4.2019	26490	20195	109.67	0.46809	0.826025	7.29	120.56	7910.07	11.5	1.18123	813.73	1793.2	59.49	576.04	123496	67.8	65.14	北京	0.0392159	0.030727	0.0712418	0.0143319	0.0228296	0.00930875	0.060374	0.0591401	0.0165325	0.0612724	0.066526	0.0711679	0.0457619	0.0380191
2017	北京	29883	121.9	5049.4	24711.7	0.075954	8.234	1.07541	10.009	5.65913	北京	2017	北京	3.2994	3.1612	3.5724	3.2602	24240	18810	115.48	0.23881	0.90585	8.55	121.9	8370.44	9.6	1.02778	777.63	1972.96	59.29	518.35	106948	70.8	61.51	北京	0.0392159	0.030727	0.0712418	0.0143319	0.0228296	0.00930875	0.060374	0.0591401	0.0165325	0.0612724	0.066526	0.0711679	0.0457619	0.0380191
2016	北京	27041.2	129.8	4665.8	22245.7	0.0692314	8.204	1.16332	9.99998	5.79606	北京	2016	北京	2.8637	2.8565	2.6374	3.299	22310	17329	128.47	0.76081	1.00762	9.65	129.79	7943.89	7.6	0.908279	742.73	1834.25	59.92	443.55	100578	77.7	54.71	北京	0.0392159	0.030727	0.0712418	0.0143319	0.0228296	0.00930875	0.060374	0.0591401	0.0165325	0.0612724	0.066526	0.0711679	0.0457619	0.0380191
2015	北京	24779.1	140.4	4419.8	20218.9	0.0740332	8.165	1.2663	9.99356	5.78444	北京	2015	北京	2.7638	2.6839	2.3417	3.7948	20569	15811	137.35	0.82258	0.925235	10.53	140.4	7495.99	7.7	0.829557	710.8	1403.89	60.36	424.78	94031	85.9	51.67	北京	0.0392159	0.030727	0.0712418	0.0143319	0.0228296	0.00930875	0.060374	0.0591401	0.0165325	0.0612724	0.066526	0.0711679	0.0457619	0.0380191
2014	北京	22926	159.2	4433	18333.9	0.0759547	8.063	1.4332	9.99191	5.74108	北京	2014	北京	2.3536	2.4392	2.1989	2.3522	18867	14535	143.11	0.68293	0.994279	11.64	159.2	6924.23	7.8	0.829737	670.8	1207.24	60.46	343.67	74661	104.7	50.56	北京	0.0392159	0.030727	0.0712418	0.0143319	0.0228296	0.00930875	0.060374	0.0591401	0.0165325	0.0612724	0.066526	0.0711679	0.0457619	0.0380191
2013	北京	21134.6	159.8	4168.3	16806.5	0.0713091	8.024	1.45793	9.98382	4.9712	北京	2013	北京	2.1562	1.9386	2.475	2.2957	17101	13564	153.02	0.4052	1.14236	12.78	159.8	6847.1	7.3	0.682709	630.8	994.44	59.89	297.62	62671	96.8	48.53	北京	0.0392159	0.030727	0.0712418	0.0143319	0.0228296	0.00930875	0.060374	0.0591401	0.0165325	0.0612724	0.066526	0.0711679	0.0457619	0.0380191
2012	北京	19024.7	148.4	3856	15020.3	0.0604264	8.4059	1.38943	9.97544	4.80729	北京	2012	北京	1.5065	1.5556	1.5942	1.1847	15365	11888	207.54	0.66433	1.15317	13.67	148.4	6112.37	6.5	0.540949	602.8	923.09	59.12	222.69	50511	94.4	47.31	北京	0.0392159	0.030727	0.0712418	0.0143319	0.0228296	0.00930875	0.060374	0.0591401	0.0165325	0.0612724	0.066526	0.0711679	0.0457619	0.0380191
2011	北京	17188.8	134.5	3563.3	13491	0.0577278	8.3461	1.30064	9.96867	4.70773	北京	2011	北京	0.7941	0.9753	0.7223	0.3259	13742	11086	209.33	0.32799	1.12602	13.84	134.5	5578.93	6.7	0.457103	579.8	820.91	58.79	187.34	40888	93.9	45.4	北京	0.0392159	0.030727	0.0712418	0.0143319	0.0228296	0.00930875	0.060374	0.0591401	0.0165325	0.0612724	0.066526	0.0711679	0.0457619	0.0380191
2022	天津	16132.2	273.2	5982.3	9876.7	0.0404055	8.373	2.56867	9.63102	4.87748	天津	2022	天津	3.9791	3.7599	4.2616	4.2415	29018	18934	293.98	0	1.19619	15.52	273.2	11722.2	20.5	0.638993	104.5	670.21	59.45	110.3	71545	40.2	52.47	天津	0.0392159	0.030727	0.0712418	0.0143319	0.0228296	0.00930875	0.060374	0.0591401	0.0165325	0.0612724	0.066526	0.0711679	0.0457619	0.0380191
2021	天津	15685.1	265.9	5672.7	9746.5	0.0469493	8.355	2.44837	9.63607	4.91632	天津	2021	天津	3.7923	3.5768	3.9969	4.1608	27955	19285	285.43	0.26563	1.17322	15.66	265.9	13010.2	21	0.63135	103.96	660.47	58.34	148.01	97910	59.8	62.04	天津	0.0392159	0.030727	0.0712418	0.0143319	0.0228296	0.00930875	0.060374	0.0591401	0.0165325	0.0612724	0.066526	0.0711679	0.0457619	0.0380191
2020	天津	14008	210.3	4911.8	8885.9	0.0491282	8.171	2.24566	9.70571	4.88658	天津	2020	天津	3.6146	3.4029	3.7391	4.0874	25691	16844	299.12	0.63953	1.14816	15.29	210.3	12414.4	20.9	0.520791	101.84	672.09	57.22	154.82	75434	52.8	57.6	天津	0.0392159	0.030727	0.0712418	0.0143319	0.0228296	0.00930875	0.060374	0.0591401	0.0165325	0.0612724	0.066526	0.0711679	0.0457619	0.0380191
2019	天津	14055.5	185.4	4947.2	8922.9	0.0454227	8.169	1.90945	9.68855	5.06639	天津	2019	天津	3.4411	3.2386	3.4901	4.0211	24804	17843	304.8	0.57595	1.14015	16.24	185.4	12052.8	19.9	0.467497	100.62	617.89	53.94	161.51	57799	44.1	39.24	天津	0.0392159	0.030727	0.0712418	0.0143319	0.0228296	0.00930875	0.060374	0.0591401	0.0165325	0.0612724	0.066526	0.0711679	0.0457619	0.0380191
2018	天津	13362.9	175.3	4835.3	8352.3	0.0534004	8.115	1.75901	9.69626	5.33754	天津	2018	天津	3.1688	2.9535	3.1794	3.861	23065	16863	304.66	0.5	1.23361	16.95	175.3	10656.7	20	0.421646	100.01	559.99	52.33	165.71	54680	26.2	36.91	天津	0.0392159	0.030727	0.0712418	0.0143319	0.0228296	0.00930875	0.060374	0.0591401	0.0165325	0.0612724	0.066526	0.0711679	0.0457619	0.0380191
2017	天津	12450.6	169	4564.1	7717.5	0.0482431	8.234	1.64685	9.71306	5.39771	天津	2017	天津	2.8403	2.579	3.1013	3.2291	21754	16386	306.62	0	0.945916	18.01	168.96	11288.9	20.6	0.395886	99.25	564.96	51.47	158.36	41675	14.4	40.32	天津	0.0392159	0.030727	0.0712418	0.0143319	0.0228296	0.00930875	0.060374	0.0591401	0.0165325	0.0612724	0.066526	0.0711679	0.0457619	0.0380191
2016	天津	11477.2	168.5	4368	6940.8	0.0435256	8.204	1.64137	9.72699	5.36504	天津	2016	天津	2.4584	2.2541	2.3161	3.3915	20076	15912	306.62	0.89167	0.943957	21.78	168.46	12779.4	20.5	0.393545	98.84	527.99	51.38	161.02	39734	7.8	92.19	天津	0.0392159	0.030727	0.0712418	0.0143319	0.0228296	0.00930875	0.060374	0.0591401	0.0165325	0.0612724	0.066526	0.0711679	0.0457619	0.0380191
2015	天津	10879.5	162.3	4489.6	6227.6	0.0482868	8.165	1.53837	9.71414	5.41165	天津	2015	天津	2.3753	2.1189	1.9546	3.9862	18482	14739	308.87	0.89535	0.792218	21.78	162.31	11832	19.6	0.386124	97.3	398.34	51.29	156.08	37342	5.5	102.44	天津	0.0392159	0.030727	0.0712418	0.0143319	0.0228296	0.00930875	0.060374	0.0591401	0.0165325	0.0612724	0.066526	0.0711679	0.0457619	0.0380191
2014	天津	10640.6	158.8	4615.5	5866.3	0.0467674	8.063	1.47691	9.6872	5.24175	天津	2014	天津	2.0016	1.9386	1.8028	2.5711	17014	13739	308.87	0.91262	0.802075	23.27	158.82	10518.2	18.5	0.368163	94.9	317.75	50.58	134.91	26351	2	109.04	天津	0.0392159	0.030727	0.0712418	0.0143319	0.0228296	0.00930875	0.060374	0.0591401	0.0165325	0.0612724	0.066526	0.0711679	0.0457619	0.0380191
2013	天津	9945.4	154.8	4407.1	5383.6	0.048262	8.024	1.40448	9.66256	5.1665	天津	2013	天津	1.7526	1.4654	1.9752	2.2967	15353	12491	308.87	0.19231	0.796384	24.34	154.79	9130.2	17.5	0.359134	88.5	276.8	48.99	123.03	24856	0.5	69.22	天津	0.0392159	0.030727	0.0712418	0.0143319	0.0228296	0.00930875	0.060374	0.0591401	0.0165325	0.0612724	0.066526	0.0711679	0.0457619	0.0380191
2012	天津	9043	147.9	4134	4761.1	0.0471162	8.4059	1.28913	9.64154	5.035	天津	2012	天津	1.2296	1.1061	1.3577	1.4044	13593	10254	337.04	0.62275	0.790277	24.45	147.9	7934.78	17.1	0.329413	54.24	238.16	47.31	100.98	19782	0.5	51.62	天津	0.0392159	0.030727	0.0712418	0.0143319	0.0228296	0.00930875	0.060374	0.0591401	0.0165325	0.0612724	0.066526	0.0711679	0.0457619	0.0380191
2011	天津	8112.5	141.1	3756.3	4215.2	0.0510931	8.3461	1.19019	9.62661	5.12396	天津	2011	天津	0.6058	0.6937	0.5333	0.4472	11941	8273	338	0.39506	0.757789	24.39	141.1	7067.67	16.4	0.318906	51.58	211.74	44.97	91.78	13982	0.7	51.3	天津	0.0392159	0.030727	0.0712418	0.0143319	0.0228296	0.00930875	0.060374	0.0591401	0.0165325	0.0612724	0.066526	0.0711679	0.0457619	0.0380191
2022	河北	41988	4408.6	16129.6	21449.8	0.0937217	8.373	2.69505	12.2511	7.59529	河北	2022	河北	3.5967	3.4528	3.6139	4.0187	19364	16271	4102.86	0.43237	0.983624	271.64	4408.6	43254.2	55.4	0.578926	6359.83	2042.54	177.37	872.14	115314	1212.8	471.25	河北	0.0392159	0.030727	0.0712418	0.0143319	0.0228296	0.00930875	0.060374	0.0591401	0.0165325	0.0612724	0.066526	0.0711679	0.0457619	0.0380191
2021	河北	40397.1	4030.4	16355.8	20010.9	0.104517	8.355	2.42525	12.2413	7.61515	河北	2021	河北	3.4099	3.2468	3.3956	3.9684	18179	15391	3952.24	0.49396	1.00005	276.87	4030.4	40087.3	57	0.529343	6147.02	1994.5	170.43	924.79	120034	1132.8	476.09	河北	0.0392159	0.030727	0.0712418	0.0143319	0.0228296	0.00930875	0.060374	0.0591401	0.0165325	0.0612724	0.066526	0.0711679	0.0457619	0.0380191
2020	河北	36013.8	3880.4	13765.1	18368.4	0.109583	8.171	2.26226	12.2295	7.73197	河北	2020	河北	3.227	3.041	3.1842	3.9192	16467	12644	4470.03	0.25498	1.01553	285.71	3880.4	38919.8	60.5	0.508465	5934.37	2088.64	160.48	988.74	92196	1038.9	454.73	河北	0.0392159	0.030727	0.0712418	0.0143319	0.0228296	0.00930875	0.060374	0.0591401	0.0165325	0.0612724	0.066526	0.0711679	0.0457619	0.0380191
2019	河北	34978.6	3518.4	13393.7	18066.4	0.117736	8.169	1.9742	12.1909	7.93812	河北	2019	河北	3.0506	2.8439	2.9733	3.8738	15373	12372	4482.16	0.46076	1.03856	297.27	3518.44	37712.9	53.2	0.458335	5722.22	1989.16	147.4	978.27	57809	952.4	501.57	河北	0.0392159	0.030727	0.0712418	0.0143319	0.0228296	0.00930875	0.060374	0.0591401	0.0165325	0.0612724	0.066526	0.0711679	0.0457619	0.0380191
2018	河北	32494.6	3338.6	12904.1	16252	0.117298	8.115	1.80098	12.1717	8.26289	河北	2018	河北	2.8277	2.6406	2.6792	3.7155	14031	11383	4492.33	0.63914	1.06371	312.4	3338.59	35411.2	51.7	0.429699	5532.54	1789.29	134.26	906.27	51894	857.5	505.16	河北	0.0392159	0.030727	0.0712418	0.0143319	0.0228296	0.00930875	0.060374	0.0591401	0.0165325	0.0612724	0.066526	0.0711679	0.0457619	0.0380191
2017	河北	30640.8	3130	12778	14732.8	0.117923	8.234	1.63858	12.1637	8.18404	河北	2017	河北	2.5817	2.3289	2.7345	3.1387	12881	10536	4474.67	0.46838	1.10567	322	3129.98	33406.8	51.9	0.393514	5379.15	1713.89	126.89	782.91	35348	721	615.16	河北	0.0392159	0.030727	0.0712418	0.0143319	0.0228296	0.00930875	0.060374	0.0591401	0.0165325	0.0612724	0.066526	0.0711679	0.0457619	0.0380191
2016	河北	28474.1	3082.5	12332.3	13059.3	0.132372	8.204	1.55772	12.1465	8.1044	河北	2016	河北	2.1436	1.9155	1.9687	3.2146	11919	9798	4457.64	0.3882	1.14395	331.79	3082.5	31750	50	0.38206	5187.9	1491.49	121.61	800.79	31826	572.1	600.78	河北	0.0392159	0.030727	0.0712418	0.0143319	0.0228296	0.00930875	0.060374	0.0591401	0.0165325	0.0612724	0.066526	0.0711679	0.0457619	0.0380191
2015	河北	26398.4	3100.5	11519.5	11778.4	0.126503	8.165	1.49064	12.1257	8.01142	河北	2015	河北	1.9953	1.7278	1.5145	3.752	11051	9023	4447.98	0.53797	0.761768	335.49	3100.54	29448.3	49.9	0.383116	5061.55	1163.1	117.92	712.49	30130	426.5	611.82	河北	0.0392159	0.030727	0.0712418	0.0143319	0.0228296	0.00930875	0.060374	0.0591401	0.0165325	0.0612724	0.066526	0.0711679	0.0457619	0.0380191
2014	河北	25208.9	3164.7	11476.9	10567.3	0.124756	8.063	1.44907	12.0963	7.91877	河北	2014	河北	1.6076	1.4997	1.3134	2.4986	10186	8248	4404.22	0.5685	0.772641	335.61	3164.71	26671.9	49.9	0.389632	4826.45	931.94	116.43	583.52	20132	422.8	631.33	河北	0.0392159	0.030727	0.0712418	0.0143319	0.0228296	0.00930875	0.060374	0.0591401	0.0165325	0.0612724	0.066526	0.0711679	0.0457619	0.0380191
2013	河北	24259.6	3141.9	11178.4	9939.3	0.115909	8.024	1.39497	12.0696	7.79791	河北	2013	河北	1.4498	1.0566	1.6285	2.4235	9188	7377	4349.03	0.47745	0.781959	331.04	3141.85	23194.2	50.1	0.387452	4679.05	837.59	117.44	511.11	18186	430.4	616.37	河北	0.0392159	0.030727	0.0712418	0.0143319	0.0228296	0.00930875	0.060374	0.0591401	0.0165325	0.0612724	0.066526	0.0711679	0.0457619	0.0380191
2012	河北	23077.5	2914	10919.7	9243.8	0.108745	8.4059	1.26677	12.0018	7.67443	河北	2012	河北	0.8932	0.6546	1.0815	1.339	8158	6451	4603.07	0.56689	0.79231	329.33	2914	19661.3	49.8	0.361378	6411.51	766.16	116.88	443.62	15315	222.6	593.94	河北	0.0392159	0.030727	0.0712418	0.0143319	0.0228296	0.00930875	0.060374	0.0591401	0.0165325	0.0612724	0.066526	0.0711679	0.0457619	0.0380191
2011	河北	21384.7	2702.8	10275.5	8406.4	0.103494	8.3461	1.16146	11.9638	7.53711	河北	2011	河北	0.3242	0.1846	0.4419	0.5715	7187	5666	4596.61	0.38177	0.7999	326.28	2702.8	16389.3	49.8	0.338583	6351.47	732.89	114.93	366.1	11119	193	559.22	河北	0.0392159	0.030727	0.0712418	0.0143319	0.0228296	0.00930875	0.060374	0.0591401	0.0165325	0.0612724	0.066526	0.0711679	0.0457619	0.0380191
2022	山西	25583.9	1335.3	13848.5	10400	0.0981656	8.373	1.76243	11.8877	7.18546	山西	2022	山西	3.6025	3.7258	3.1862	3.9996	16323	12091	1502.01	0.22569	2.10678	103.47	1335.3	8884.88	43	0.391905	8070.26	1012.93	94.57	576.87	33068	261	156.16	山西	0.0392159	0.030727	0.0712418	0.0143319	0.0228296	0.00930875	0.060374	0.0591401	0.0165325	0.0612724	0.066526	0.0711679	0.0457619	0.0380191
2021	山西	22870.4	1286.9	11578.1	10005.4	0.101896	8.355	1.67637	11.8818	7.22293	山西	2021	山西	3.4291	3.4957	3.0498	3.9123	15308	11410	1498.06	0.3458	2.16893	105.64	1286.87	8389.88	42.7	0.378183	7731.93	997.5	89.08	514.23	37379	252	156.43	山西	0.0392159	0.030727	0.0712418	0.0143319	0.0228296	0.00930875	0.060374	0.0591401	0.0165325	0.0612724	0.066526	0.0711679	0.0457619	0.0380191
2020	山西	17835.6	1166.6	7703.2	8965.8	0.1279	8.171	1.48032	11.8798	7.07013	山西	2020	山西	3.2573	3.2729	2.9137	3.8304	13878	10290	1517.38	0.27643	2.22002	107.41	1166.6	7718.38	42.8	0.347874	7395.74	932.77	84.2	653.68	27296	233.6	140.27	山西	0.0392159	0.030727	0.0712418	0.0143319	0.0228296	0.00930875	0.060374	0.0591401	0.0165325	0.0612724	0.066526	0.0711679	0.0457619	0.0380191
2019	山西	16961.6	825.3	7466.3	8670	0.132896	8.169	1.20176	11.8795	7.10923	山西	2019	山西	3.0873	3.0561	2.7789	3.7507	12902	9728	1519.34	0.39811	2.32241	108.41	825.3	6978.64	43.9	0.24841	7086.54	883.34	80.2	626.04	16598	216.9	104.9	山西	0.0392159	0.030727	0.0712418	0.0143319	0.0228296	0.00930875	0.060374	0.0591401	0.0165325	0.0612724	0.066526	0.0711679	0.0457619	0.0380191
2018	山西	15958.1	740.8	7074.5	8142.9	0.135703	8.115	1.03881	11.8729	7.23121	山西	2018	山西	2.8365	2.7703	2.4973	3.6719	11750	9172	1518.68	0.70655	2.46699	109.61	740.75	6384.85	42.3	0.221762	6798.51	824.58	76.56	581.34	15060	196.7	101.42	山西	0.0392159	0.030727	0.0712418	0.0143319	0.0228296	0.00930875	0.060374	0.0591401	0.0165325	0.0612724	0.066526	0.0711679	0.0457619	0.0380191
2017	山西	14484.3	719.2	6635.3	7129.8	0.127225	8.234	0.976072	11.8696	7.15031	山西	2017	山西	2.5995	2.4302	2.5498	3.2492	10788	8424	1511.21	0.45124	2.59945	112	719.16	6040.54	45.2	0.213578	6484.79	823.21	76.3	477.91	11311	185.8	99.26	山西	0.0392159	0.030727	0.0712418	0.0143319	0.0228296	0.00930875	0.060374	0.0591401	0.0165325	0.0612724	0.066526	0.0711679	0.0457619	0.0380191
2016	山西	11946.4	724.3	5113.6	6108.5	0.125995	8.204	0.952277	11.864	7.08674	山西	2016	山西	2.2481	2.0551	1.8938	3.5296	10082	8029	1487.29	0.41056	2.05906	117.07	724.28	14198	45.4	0.213502	6171.76	698.2	75.63	432.02	10062	120.7	97.52	山西	0.0392159	0.030727	0.0712418	0.0143319	0.0228296	0.00930875	0.060374	0.0591401	0.0165325	0.0612724	0.066526	0.0711679	0.0457619	0.0380191
2015	山西	11836.4	726.2	5219.7	5890.5	0.115239	8.165	0.917795	11.8562	7.01786	山西	2015	山西	2.063	1.8614	1.4152	3.9057	9454	7421	1460.28	0.47996	1.07787	118.55	726.21	14074.1	45.5	0.212337	5846.39	586.73	74.02	394.46	10020	121.9	96.83	山西	0.0392159	0.030727	0.0712418	0.0143319	0.0228296	0.00930875	0.060374	0.0591401	0.0165325	0.0612724	0.066526	0.0711679	0.0457619	0.0380191
2014	山西	12094.7	736.6	6378	4980.1	0.106263	8.063	0.893478	11.8525	6.96234	山西	2014	山西	1.6766	1.6316	1.2478	2.6043	8809	6992	1408.17	0.42216	1.11514	119.61	736.62	12354.5	45.6	0.21173	5667.97	465.37	71.32	327.85	8371	49.7	97.08	山西	0.0392159	0.030727	0.0712418	0.0143319	0.0228296	0.00930875	0.060374	0.0591401	0.0165325	0.0612724	0.066526	0.0711679	0.0457619	0.0380191
2013	山西	11987.2	697.6	6684.3	4605.3	0.112104	8.024	0.823784	11.8453	6.85298	山西	2013	山西	1.4422	1.154	1.3908	2.4875	7949	6458	1382.79	0.36291	1.15223	121.02	697.57	11031.9	45.6	0.19987	5475.69	412.38	67.68	339.69	8565	51.1	99.78	山西	0.0392159	0.030727	0.0712418	0.0143319	0.0228296	0.00930875	0.060374	0.0591401	0.0165325	0.0612724	0.066526	0.0711679	0.0457619	0.0380191
2012	山西	11683.1	642	6852.7	4188.4	0.112207	8.4059	0.733009	11.8333	6.71453	山西	2012	山西	0.9298	0.752	0.8648	1.635	7064	6184	1319.06	0.50977	1.20946	118.28	641.97	8863.26	45.8	0.182537	5290.62	384.65	63.73	309.63	7196	52.5	94.95	山西	0.0392159	0.030727	0.0712418	0.0143319	0.0228296	0.00930875	0.060374	0.0591401	0.0165325	0.0612724	0.066526	0.0711679	0.0457619	0.0380191
2011	山西	10894.4	586.6	6750.2	3557.7	0.102143	8.3461	0.650493	11.8116	6.57214	山西	2011	山西	0.3341	0.2894	0.2161	0.6957	6225	5096	1319.85	0.53675	1.26205	114.57	586.56	7073.06	44.1	0.166793	5560.62	364.67	59.45	241.45	4974	49.5	86.6	山西	0.0392159	0.030727	0.0712418	0.0143319	0.0228296	0.00930875	0.060374	0.0591401	0.0165325	0.0612724	0.066526	0.0711679	0.0457619	0.0380191
2022	内蒙古	23388.9	2655.1	11352.5	9381.3	0.154974	8.373	5.72537	12.2838	6.36544	内蒙	2022	内蒙古	3.4228	3.497	3.0764	3.7712	19641	15444	4379.31	0.63467	1.9038	227.36	2655.1	13635.3	37.4	0.30969	16678.7	667.02	53.45	912.44	24640	90.5	103.29	内蒙	0.0392159	0.030727	0.0712418	0.0143319	0.0228296	0.00930875	0.060374	0.0591401	0.0165325	0.0612724	0.066526	0.0711679	0.0457619	0.0380191
2021	内蒙古	21166	2353.9	9880.6	8931.5	0.15628	8.355	5.00042	12.2672	6.37843	内蒙	2021	内蒙古	3.2538	3.2956	2.9147	3.7211	18337	15691	4379.28	0.59224	2.06239	241.9	2353.9	11594.7	38.5	0.273065	15959.2	645.56	50.68	818.84	24362	94.7	119.79	内蒙	0.0392159	0.030727	0.0712418	0.0143319	0.0228296	0.00930875	0.060374	0.0591401	0.0165325	0.0612724	0.066526	0.0711679	0.0457619	0.0380191
2020	内蒙古	17258	2028.8	6908.2	8321.1	0.164623	8.171	4.44439	12.2559	6.31825	内蒙	2020	内蒙古	3.0939	3.104	2.7566	3.674	16567	13594	3199.12	0.53163	2.18973	207.69	2028.8	10559.8	38.6	0.231909	15221.5	740	48.66	867.59	17958	87.3	107.96	内蒙	0.0392159	0.030727	0.0712418	0.0143319	0.0228296	0.00930875	0.060374	0.0591401	0.0165325	0.0612724	0.066526	0.0711679	0.0457619	0.0380191
2019	内蒙古	17212.5	1863.3	6763.1	8586.1	0.171485	8.169	3.92087	12.2361	6.3663	内蒙	2019	内蒙古	2.9389	2.9145	2.6031	3.6298	15283	13816	3199.19	0.42779	2.298	218.44	1863.3	10720.6	37.5	0.213112	14625	729.82	47.2	874.73	11059	87.7	91.16	内蒙	0.0392159	0.030727	0.0712418	0.0143319	0.0228296	0.00930875	0.060374	0.0591401	0.0165325	0.0612724	0.066526	0.0711679	0.0457619	0.0380191
2018	内蒙古	16140.8	1750.7	6335.4	8054.7	0.187099	8.115	3.57352	12.2192	6.813	内蒙	2018	内蒙古	2.7157	2.6949	2.3231	3.4976	13803	12661	3196.52	0.60092	2.40854	222.67	1750.67	10047.4	33.4	0.201698	14088.6	659.25	45.53	903.96	9625	96.4	85.51	内蒙	0.0392159	0.030727	0.0712418	0.0143319	0.0228296	0.00930875	0.060374	0.0591401	0.0165325	0.0612724	0.066526	0.0711679	0.0457619	0.0380191
2017	内蒙古	14898.1	1649.8	5874.3	7374	0.178305	8.234	3.26586	12.2032	6.55905	内蒙	2017	内蒙古	2.585	2.3892	2.492	3.401	12584	12184	3174.83	0.61726	2.58765	235.04	1649.77	14013.2	28.9	0.186117	13551	570.06	44.81	807.71	6271	103.5	78.9	内蒙	0.0392159	0.030727	0.0712418	0.0143319	0.0228296	0.00930875	0.060374	0.0591401	0.0165325	0.0612724	0.066526	0.0711679	0.0457619	0.0380191
2016	内蒙古	13789.3	1650.6	5579.8	6558.9	0.161548	8.204	3.14405	12.1862	6.73981	内蒙	2016	内蒙古	2.2993	2.02	1.8489	4.04	11609	11463	3131.53	0.62743	2.68897	234.64	1650.56	15080	34	0.187223	13083.3	487.04	43.67	729.02	5846	97.3	71.09	内蒙	0.0392159	0.030727	0.0712418	0.0143319	0.0228296	0.00930875	0.060374	0.0591401	0.0165325	0.0612724	0.066526	0.0711679	0.0457619	0.0380191
2015	内蒙古	12949	1630.2	5269.5	6049.2	0.158849	8.165	2.98482	12.0747	6.63948	内蒙	2015	内蒙古	2.1455	1.8534	1.3604	4.5366	10776	10637	3086.9	0.6444	2.21378	229.35	1630.21	13702.2	33.9	0.196506	12597.2	395.48	42.08	675.58	5522	84.3	72.26	内蒙	0.0392159	0.030727	0.0712418	0.0143319	0.0228296	0.00930875	0.060374	0.0591401	0.0165325	0.0612724	0.066526	0.0711679	0.0457619	0.0380191
2014	内蒙古	12158.2	1638	5114.4	5405.8	0.133426	8.063	2.9151	12.0562	6.56273	内蒙	2014	内蒙古	1.7256	1.6546	1.1488	3.0084	9976	9972	3011.88	0.60933	2.22408	222.67	1638.02	17591.8	33.9	0.205704	12210.8	313.97	40.64	517.69	4031	71.8	63.12	内蒙	0.0392159	0.030727	0.0712418	0.0143319	0.0228296	0.00930875	0.060374	0.0591401	0.0165325	0.0612724	0.066526	0.0711679	0.0457619	0.0380191
2013	内蒙古	11392.4	1582.9	4870.1	4939.4	0.126564	8.024	2.73968	12.0288	6.45975	内蒙	2013	内蒙古	1.4659	1.1637	1.3884	2.6045	8985	9080	2957.76	0.49524	2.28039	202.42	1582.87	14217.4	32.9	0.205201	11876.3	274.69	39.92	466.58	3836	60.9	59.56	内蒙	0.0392159	0.030727	0.0712418	0.0143319	0.0228296	0.00930875	0.060374	0.0591401	0.0165325	0.0612724	0.066526	0.0711679	0.0457619	0.0380191
2012	内蒙古	10470.1	1453.2	4553.6	4463.3	0.131591	8.4059	2.39166	12.0062	6.33965	内蒙	2012	内蒙古	0.9168	0.7503	0.9544	1.3978	7956	7972	3125.24	0.6607	2.33827	189.04	1453.22	11875.7	31.7	0.189445	11574.6	247.74	39.14	450.83	3084	24.8	55.15	内蒙	0.0392159	0.030727	0.0712418	0.0143319	0.0228296	0.00930875	0.060374	0.0591401	0.0165325	0.0612724	0.066526	0.0711679	0.0457619	0.0380191
2011	内蒙古	9458.1	1309.7	4044	4104.4	0.131031	8.3461	2.07806	11.9891	6.20799	内蒙	2011	内蒙古	0.2889	0.2465	0.3027	0.4035	6942	6880	3072.39	0.44618	2.37637	176.94	1309.72	10365.2	32.3	0.173712	11219.3	229.78	38.44	391.68	2262	19.8	52.3	内蒙	0.0392159	0.030727	0.0712418	0.0143319	0.0228296	0.00930875	0.060374	0.0591401	0.0165325	0.0612724	0.066526	0.0711679	0.0457619	0.0380191
2022	辽宁	28826.1	2598	11363.6	14864.5	0.0739991	8.373	4.57196	11.7834	7.27268	辽宁	2022	辽宁	3.5826	3.3801	3.8032	3.8479	19908	14326	1716.63	0.41711	1.62796	130.51	2597.6	7573.53	37.2	0.620727	6144.1	1000.7	118.02	463.34	77434	185.8	130.05	辽宁	0.0392159	0.030727	0.0712418	0.0143319	0.0228296	0.00930875	0.060374	0.0591401	0.0165325	0.0612724	0.066526	0.0711679	0.0457619	0.0380191
2021	辽宁	27569.5	2461.9	10883.3	14224.2	0.069642	8.355	4.28498	11.7874	7.29091	辽宁	2021	辽宁	3.422	3.2213	3.5419	3.8527	19217	14606	1693.05	0.36451	1.69589	135.03	2461.9	7310.36	37	0.588343	5936.1	980.03	117.84	409.44	80191	169.1	167.92	辽宁	0.0392159	0.030727	0.0712418	0.0143319	0.0228296	0.00930875	0.060374	0.0591401	0.0165325	0.0612724	0.066526	0.0711679	0.0457619	0.0380191
2020	辽宁	25011.4	2284.8	9357.5	13369.1	0.0839401	8.171	3.86714	11.7822	7.1863	辽宁	2020	辽宁	3.2629	3.0711	3.2812	3.8633	17450	12311	1632.54	0.68521	1.73506	137.57	2284.8	7125.11	37	0.552804	5723.58	969.6	114.08	504.83	60185	77	159.19	辽宁	0.0392159	0.030727	0.0712418	0.0143319	0.0228296	0.00930875	0.060374	0.0591401	0.0165325	0.0612724	0.066526	0.0711679	0.0457619	0.0380191
2019	辽宁	24855.3	2178	9475.9	13201.4	0.0874782	8.169	3.54854	11.7342	7.01661	辽宁	2019	辽宁	3.1101	2.9244	3.0252	3.8777	16108	12030	1629.18	0.23961	1.79155	139.91	2177.97	6944.55	27.1	0.53755	5553.41	918.72	104.11	502.57	40037	128.5	176.97	辽宁	0.0392159	0.030727	0.0712418	0.0143319	0.0228296	0.00930875	0.060374	0.0591401	0.0165325	0.0612724	0.066526	0.0711679	0.0457619	0.0380191
2018	辽宁	23510.5	2020.6	9049	12441	0.0865051	8.115	3.18333	11.7197	7.4767	辽宁	2018	辽宁	2.9095	2.7181	2.7948	3.7501	14656	11455	1619.33	0.31711	1.87506	145.02	2020.56	6923.78	23.3	0.501437	5394.54	852.57	96.32	461.74	35149	213.5	306.22	辽宁	0.0392159	0.030727	0.0712418	0.0143319	0.0228296	0.00930875	0.060374	0.0591401	0.0165325	0.0612724	0.066526	0.0711679	0.0457619	0.0380191
2017	辽宁	21693	1902.3	8328.9	11461.8	0.0941157	8.234	2.92676	11.7175	7.24022	辽宁	2017	辽宁	2.6718	2.3987	2.9127	3.1357	13747	10787	1610.55	0.3076	1.88355	145.47	1902.28	6676.74	20.7	0.479445	5217.84	946	98.1	459.23	26495	213.7	528.01	辽宁	0.0392159	0.030727	0.0712418	0.0143319	0.0228296	0.00930875	0.060374	0.0591401	0.0165325	0.0612724	0.066526	0.0711679	0.0457619	0.0380191
2016	辽宁	20392.5	1841.2	7865.7	10685.6	0.105021	8.204	2.79442	11.7003	7.17143	辽宁	2016	辽宁	2.3141	2.0774	2.2006	3.3021	12881	9953	1572.99	0.21086	1.95657	148.06	1841.21	6692.25	20.9	0.45862	5024.22	837.76	99.87	480.73	25104	220.6	489.8	辽宁	0.0392159	0.030727	0.0712418	0.0143319	0.0228296	0.00930875	0.060374	0.0591401	0.0165325	0.0612724	0.066526	0.0711679	0.0457619	0.0380191
2015	辽宁	20210.3	2053.7	8344.6	9811.9	0.0995334	8.165	2.92755	11.6983	7.08891	辽宁	2015	辽宁	2.264	1.9417	1.7841	4.2006	12057	8873	1520.31	0.65626	1.54076	152.09	2053.71	17917.9	21.1	0.497755	4857.83	708.01	100.57	446.07	25182	181	457.76	辽宁	0.0392159	0.030727	0.0712418	0.0143319	0.0228296	0.00930875	0.060374	0.0591401	0.0165325	0.0612724	0.066526	0.0711679	0.0457619	0.0380191
2014	辽宁	20025.7	2002	9038.8	8984.9	0.0873636	8.063	2.75027	11.6564	6.96319	辽宁	2014	辽宁	1.8761	1.7549	1.6289	2.7253	11191	7801	1473.97	0.68287	1.54559	151.55	2001.95	24730.8	20.9	0.498791	4733.48	557.7	99.83	443.85	19525	151	433.07	辽宁	0.0392159	0.030727	0.0712418	0.0143319	0.0228296	0.00930875	0.060374	0.0591401	0.0165325	0.0612724	0.066526	0.0711679	0.0457619	0.0380191
2013	辽宁	19208.8	1973.4	9204.2	8031.2	0.0897599	8.024	2.64952	11.617	6.79727	辽宁	2013	辽宁	1.6007	1.2667	1.8154	2.3133	10161	7032	1407.84	0.60222	1.57844	151.76	1973.42	25107.7	20.9	0.49764	4520.39	622.65	96.8	466.52	21656	107.5	394.78	辽宁	0.0392159	0.030727	0.0712418	0.0143319	0.0228296	0.00930875	0.060374	0.0591401	0.0165325	0.0612724	0.066526	0.0711679	0.0457619	0.0380191
2012	辽宁	17848.6	1869.3	8886.9	7092.4	0.0888477	8.4059	2.44812	11.5671	6.66096	辽宁	2012	辽宁	1.0353	0.8901	1.2036	1.2091	9061	5892	1698.82	0.79572	1.62079	146.9	1869.28	21836.3	20.2	0.476566	6678.1	402.42	93.41	405.02	21223	130.3	373.44	辽宁	0.0392159	0.030727	0.0712418	0.0143319	0.0228296	0.00930875	0.060374	0.0591401	0.0165325	0.0612724	0.066526	0.0711679	0.0457619	0.0380191
2011	辽宁	16354.9	1693.4	8478.7	6182.9	0.0842838	8.3461	2.12436	11.5524	6.32382	辽宁	2011	辽宁	0.4329	0.4496	0.4464	0.3533	8011	5311	1588.38	0.3845	1.66571	144.64	1693.37	17726.3	19.1	0.441097	6486.51	376.26	90.22	329.2	19176	101.4	366.33	辽宁	0.0392159	0.030727	0.0712418	0.0143319	0.0228296	0.00930875	0.060374	0.0591401	0.0165325	0.0612724	0.066526	0.0711679	0.0457619	0.0380191
2022	吉林	12818.1	1689.1	4370.2	6758.7	0.12747	8.373	3.77906	11.6061	6.03572	吉林	2022	吉林	3.4001	3.233	3.4401	3.9879	18134	12729	1906.48	0.39741	1.42877	222.75	1689.1	13269.8	41.5	0.279826	3230.31	677.7	78.87	515.49	29534	144.6	58.77	吉林	0.0392159	0.030727	0.0712418	0.0143319	0.0228296	0.00930875	0.060374	0.0591401	0.0165325	0.0612724	0.066526	0.0711679	0.0457619	0.0380191
2021	吉林	13163.8	1553.8	4768.3	6841.7	0.125058	8.355	3.4156	11.5963	6.12052	吉林	2021	吉林	3.2413	3.0667	3.2032	3.9186	17642	13411	1918.95	0.19494	1.49113	223	1553.84	13596.1	39.9	0.259283	3004.09	691.29	75.56	462.32	29879	119.1	72.31	吉林	0.0392159	0.030727	0.0712418	0.0143319	0.0228296	0.00930875	0.060374	0.0591401	0.0165325	0.0612724	0.066526	0.0711679	0.0457619	0.0380191
2020	吉林	12256	1553	4319.9	6383.1	0.139989	8.171	3.31984	11.5885	5.98695	吉林	2020	吉林	3.0826	2.9078	2.9763	3.8529	16067	11864	1905.44	0.48483	1.57841	225.29	1553	12248.7	39.9	0.260218	2801.6	710.09	72.7	577.76	23951	112.6	69.08	吉林	0.0392159	0.030727	0.0712418	0.0143319	0.0228296	0.00930875	0.060374	0.0591401	0.0165325	0.0612724	0.066526	0.0711679	0.0457619	0.0380191
2019	吉林	11726.8	1287.3	4134.8	6304.7	0.143476	8.169	2.60111	11.5774	6.087	吉林	2019	吉林	2.9277	2.7575	2.7593	3.7962	14936	11457	1909.5	0.36777	1.67419	227.06	1287.32	11310	30.6	0.217981	2594.45	679.37	70.01	564.35	15579	96.5	54.88	吉林	0.0392159	0.030727	0.0712418	0.0143319	0.0228296	0.00930875	0.060374	0.0591401	0.0165325	0.0612724	0.066526	0.0711679	0.0457619	0.0380191
2018	吉林	11253.8	1160.7	4051.5	6041.6	0.141849	8.115	2.24583	11.5655	6.73364	吉林	2018	吉林	2.7608	2.5655	2.5523	3.7846	13748	10826	1893.05	0.26135	1.75444	228.3	1160.71	13496.4	23.3	0.198162	2385.81	629.89	65.83	537.55	13885	94.3	54.85	吉林	0.0392159	0.030727	0.0712418	0.0143319	0.0228296	0.00930875	0.060374	0.0591401	0.0165325	0.0612724	0.066526	0.0711679	0.0457619	0.0380191
2017	吉林	10922	1095.4	3995.5	5831.2	0.148903	8.234	2.02827	11.5511	6.6995	吉林	2017	吉林	2.5476	2.2745	2.7362	3.1072	12950	10279	1893.05	0.53057	1.85292	231.02	1095.36	13283.9	25.6	0.186931	2180.7	641.39	64.39	554.77	11090	75	52.96	吉林	0.0392159	0.030727	0.0712418	0.0143319	0.0228296	0.00930875	0.060374	0.0591401	0.0165325	0.0612724	0.066526	0.0711679	0.0457619	0.0380191
2016	吉林	10427	1130.1	3901.4	5395.5	0.15351	8.204	2.04736	11.5375	6.75215	吉林	2016	吉林	2.1707	1.9194	2.0414	3.2359	12123	9521	1832.17	0.61053	1.95257	233.61	1130.05	13923.2	26.2	0.193147	1987.1	557.12	64.23	550.5	9995	54.9	51.13	吉林	0.0392159	0.030727	0.0712418	0.0143319	0.0228296	0.00930875	0.060374	0.0591401	0.0165325	0.0612724	0.066526	0.0711679	0.0457619	0.0380191
2015	吉林	10018	1270.6	3837.8	4909.6	0.127012	8.165	2.07195	11.4858	6.65454	吉林	2015	吉林	2.082	1.7549	1.5468	4.1347	11326	8783	1790.87	0.49007	1.90256	231.24	1270.64	12705.3	26	0.218259	1793.5	431.32	63.27	408.61	8878	69.4	49.6	吉林	0.0392159	0.030727	0.0712418	0.0143319	0.0228296	0.00930875	0.060374	0.0591401	0.0165325	0.0612724	0.066526	0.0711679	0.0457619	0.0380191
2014	吉林	9966.5	1270.2	3804.9	4891.5	0.105957	8.063	2.01751	11.4725	6.54463	吉林	2014	吉林	1.6562	1.5491	1.3601	2.5475	10780	8140	1628.43	0.46163	2.01792	226.66	1270.21	11339.6	23.5	0.222086	1670.21	330	61.83	308.68	6696	73.7	48.75	吉林	0.0392159	0.030727	0.0712418	0.0143319	0.0228296	0.00930875	0.060374	0.0591401	0.0165325	0.0612724	0.066526	0.0711679	0.0457619	0.0380191
2013	吉林	9427.9	1250.2	3572.1	4605.5	0.11595	8.024	1.9277	11.4531	6.42907	吉林	2013	吉林	1.3836	1.0685	1.4795	2.2497	9781	7523	1510.13	0.35526	2.06332	216.79	1250.24	9979.3	23.5	0.228406	1546.89	266.44	59.95	318.26	6219	76	48.23	吉林	0.0392159	0.030727	0.0712418	0.0143319	0.0228296	0.00930875	0.060374	0.0591401	0.0165325	0.0612724	0.066526	0.0711679	0.0457619	0.0380191
2012	吉林	8678	1195.6	3315.2	4167.2	0.117878	8.4059	1.77926	11.4426	6.28563	吉林	2012	吉林	0.8723	0.6943	0.9383	1.3399	8741	6307	1851.87	0.34497	2.12631	206.73	1195.63	9511.54	23.8	0.226713	3691.32	232.54	57.9	291.3	5930	68.1	46.12	吉林	0.0392159	0.030727	0.0712418	0.0143319	0.0228296	0.00930875	0.060374	0.0591401	0.0165325	0.0612724	0.066526	0.0711679	0.0457619	0.0380191
2011	吉林	7734.6	1105.9	2931.4	3697.4	0.116076	8.3461	1.59833	11.4269	6.10032	吉林	2011	吉林	0.2451	0.2375	0.2404	0.2786	7634	5409	1807.52	0.35967	2.24932	195.2	1105.87	7441.71	22.1	0.21515	3639.15	223.36	56.28	255.57	4920	53	42.51	吉林	0.0392159	0.030727	0.0712418	0.0143319	0.0228296	0.00930875	0.060374	0.0591401	0.0165325	0.0612724	0.066526	0.0711679	0.0457619	0.0380191
2022	黑龙江	15831.5	3635.3	4576.7	7619.4	0.171972	8.373	6.41666	12.0374	6.46879	黑龙	2022	黑龙江	3.3303	3.2084	3.3433	3.7659	18577	15162	6152.89	0.33265	2.14493	238.5	3635.3	12685.2	35.9	0.243987	6717.94	982.44	91.2	937.59	36551	194	86.27	黑龙	0.0392159	0.030727	0.0712418	0.0143319	0.0228296	0.00930875	0.060374	0.0591401	0.0165325	0.0612724	0.066526	0.0711679	0.0457619	0.0380191
2021	黑龙江	14858.2	3463.4	4086.5	7308.3	0.170228	8.355	6.02497	12.0338	6.53539	黑龙	2021	黑龙江	3.1937	3.0531	3.1363	3.7807	17889	15225	6220.51	0.4659	2.17951	238.97	3463.4	12609.5	37.5	0.236103	6269.7	995.47	87.91	868.98	38884	182.7	117.14	黑龙	0.0392159	0.030727	0.0712418	0.0143319	0.0228296	0.00930875	0.060374	0.0591401	0.0165325	0.0612724	0.066526	0.0711679	0.0457619	0.0380191
2020	黑龙江	13633.4	3445.1	3449.9	6738.5	0.167822	8.171	5.90381	12.0324	6.42778	黑龙	2020	黑龙江	3.0608	2.9048	2.9369	3.8009	16168	12360	6171.61	0.22076	2.20073	224.22	3445.1	11851	35.8	0.23706	5747.49	987.26	82.56	914.53	28475	164.2	112.2	黑龙	0.0392159	0.030727	0.0712418	0.0143319	0.0228296	0.00930875	0.060374	0.0591401	0.0165325	0.0612724	0.066526	0.0711679	0.0457619	0.0380191
2019	黑龙江	13544.4	3183.2	3640.1	6721.1	0.175991	8.169	5.14933	12.0359	6.51782	黑龙	2019	黑龙江	2.9287	2.7579	2.7464	3.8241	14982	12495	6177.59	0.40407	2.32268	223.27	3183.2	11439.2	31.9	0.221272	5334.08	952.16	77.82	881.99	19989	267.6	85.64	黑龙	0.0392159	0.030727	0.0712418	0.0143319	0.0228296	0.00930875	0.060374	0.0591401	0.0165325	0.0612724	0.066526	0.0711679	0.0457619	0.0380191
2018	黑龙江	12846.5	3001.2	3536	6309.3	0.178429	8.115	4.62638	12.0264	7.10011	黑龙	2018	黑龙江	2.7473	2.5612	2.5488	3.7228	13804	11417	6119.57	0.34912	2.41153	245.64	3001.17	10761.3	26.2	0.209918	4895.44	898.72	73.21	834.47	19435	241.1	82.8	黑龙	0.0392159	0.030727	0.0712418	0.0143319	0.0228296	0.00930875	0.060374	0.0591401	0.0165325	0.0612724	0.066526	0.0711679	0.0457619	0.0380191
2017	黑龙江	12313	2965.3	3519.5	5828.2	0.17564	8.234	4.314	12.0197	7.03896	黑龙	2017	黑龙江	2.5678	2.26	2.7586	3.2377	12665	10524	6030.97	0.27352	2.54011	251.2	2965.25	11292	26.9	0.205646	4477.31	931.44	73.42	815.16	18221	150.8	79.77	黑龙	0.0392159	0.030727	0.0712418	0.0143319	0.0228296	0.00930875	0.060374	0.0591401	0.0165325	0.0612724	0.066526	0.0711679	0.0457619	0.0380191
2016	黑龙江	11895	2751.2	3689.7	5454	0.189663	8.204	3.86113	12.0107	6.95987	黑龙	2016	黑龙江	2.2189	1.9124	2.0654	3.5097	11832	9424	5932.74	0.63066	2.63201	252.75	2751.2	10648.4	27	0.190007	4213.42	685.53	73.59	801.77	18046	89.6	77.47	黑龙	0.0392159	0.030727	0.0712418	0.0143319	0.0228296	0.00930875	0.060374	0.0591401	0.0165325	0.0612724	0.066526	0.0711679	0.0457619	0.0380191
2015	黑龙江	11690	2712.2	3926.9	5050.9	0.169495	8.165	3.60578	12.0029	6.86098	黑龙	2015	黑龙江	2.0993	1.7468	1.6406	4.0972	11095	8391	5530.84	0.71828	2.72163	255.31	2712.2	10183	27.2	0.187059	3834.23	591.77	73.52	681.48	18943	82.9	72.58	黑龙	0.0392159	0.030727	0.0712418	0.0143319	0.0228296	0.00930875	0.060374	0.0591401	0.0165325	0.0612724	0.066526	0.0711679	0.0457619	0.0380191
2014	黑龙江	12170.8	2691	4872.4	4607.4	0.142003	8.063	3.30714	11.9982	6.76446	黑龙	2014	黑龙江	1.678	1.5248	1.4248	2.6441	10453	7830	5305.2	0.56556	2.81207	251.93	2691	9828.99	29.6	0.189175	3708.28	507.09	73.06	487.67	15412	59.4	69.56	黑龙	0.0392159	0.030727	0.0712418	0.0143319	0.0228296	0.00930875	0.060374	0.0591401	0.0165325	0.0612724	0.066526	0.0711679	0.0457619	0.0380191
2013	黑龙江	11849.1	2539.6	5202.7	4106.9	0.137036	8.024	2.96443	11.9842	6.64704	黑龙	2013	黑龙江	1.414	1.0449	1.5258	2.4297	9369	7192	5342.12	0.6935	2.93074	244.96	2539.6	11453.1	29.6	0.181875	3609.73	384.32	71.79	461.7	19819	57.5	66.95	黑龙	0.0392159	0.030727	0.0712418	0.0143319	0.0228296	0.00930875	0.060374	0.0591401	0.0165325	0.0612724	0.066526	0.0711679	0.0457619	0.0380191
2012	黑龙江	11015.8	2119.6	5099.8	3796.5	0.135705	8.4059	2.39255	11.9771	6.51545	黑龙	2012	黑龙江	0.8791	0.6648	1.0046	1.3589	8367	6035	4776.48	0.3412	3.0595	240.28	2119.6	9694.75	30	0.154914	4979.77	344.15	70.45	430.39	20268	49	64.33	黑龙	0.0392159	0.030727	0.0712418	0.0143319	0.0228296	0.00930875	0.060374	0.0591401	0.0165325	0.0612724	0.066526	0.0711679	0.0457619	0.0380191
2011	黑龙江	9935	1695.5	4916.3	3323.2	0.127405	8.3461	1.88576	11.955	6.27514	黑龙	2011	黑龙江	0.3358	0.2112	0.3628	0.6983	7382	5630	4332.65	0.4441	3.35532	228.44	1695.5	7475.38	28.8	0.125669	4838.77	317.79	71	355.98	12236	43.4	58.24	黑龙	0.0392159	0.030727	0.0712418	0.0143319	0.0228296	0.00930875	0.060374	0.0591401	0.0165325	0.0612724	0.066526	0.0711679	0.0457619	0.0380191
2022	上海	44809.1	100	11407.2	33302	0.0413734	8.373	1.0361	9.47309	5.59061	上海	2022	上海	4.7579	4.3149	5.8765	4.2757	39729	27430	160.62	0	2.6866	6.56	100	9449.03	7.4	0.389717	62	2095.01	55.48	388.62	178323	18.4	6.09	上海	0.0392159	0.030727	0.0712418	0.0143319	0.0228296	0.00930875	0.060374	0.0591401	0.0165325	0.0612724	0.066526	0.0711679	0.0457619	0.0380191
2021	上海	43653.2	96.1	11366.7	32190.4	0.0540597	8.355	1.01101	9.47899	5.86278	上海	2021	上海	4.5375	4.1291	5.3776	4.3863	38521	27205	161.98	0.58233	2.573	6.59	96.1	9544.47	7.2	0.399849	59	1970.9	54.87	455.77	179317	6.9	11.32	上海	0.0392159	0.030727	0.0712418	0.0143319	0.0228296	0.00930875	0.060374	0.0591401	0.0165325	0.0612724	0.066526	0.0711679	0.0457619	0.0380191
2020	上海	38963.3	107.7	10258.6	28597.1	0.0584786	8.171	1.05136	9.46627	6.01078	上海	2020	上海	4.3193	3.952	4.8868	4.5008	34911	22095	165.05	0	2.49863	6.89	107.7	8837.48	6.2	0.45736	57	1864.99	54.07	473.8	139780	2.7	10.18	上海	0.0392159	0.030727	0.0712418	0.0143319	0.0228296	0.00930875	0.060374	0.0591401	0.0165325	0.0612724	0.066526	0.0711679	0.0457619	0.0380191
2019	上海	37987.6	107.1	10193.6	27686.9	0.0639543	8.169	1.06682	9.47613	6.38587	上海	2019	上海	4.1028	3.7825	4.3991	4.6223	33195	22449	190.76	0	2.66616	7.53	107.1	8012.22	7.7	0.433452	55	1720.01	52.66	523.1	100587	1.4	1102.04	上海	0.0392159	0.030727	0.0712418	0.0143319	0.0228296	0.00930875	0.060374	0.0591401	0.0165325	0.0612724	0.066526	0.0711679	0.0457619	0.0380191
2018	上海	36011.8	104.8	10360.8	25546.3	0.0562627	8.115	1.07651	9.48086	6.35402	上海	2018	上海	3.7773	3.4633	4.004	4.4026	30375	19965	190.76	0.39726	3.00383	8.37	104.78	7623.42	6.6	0.3982	53	1406.25	51.78	469.88	92460	1.7	1053.42	上海	0.0392159	0.030727	0.0712418	0.0143319	0.0228296	0.00930875	0.060374	0.0591401	0.0165325	0.0612724	0.066526	0.0711679	0.0457619	0.0380191
2017	上海	32925	110.8	9525.9	23288.3	0.0604866	8.234	1.08777	9.49717	6.23363	上海	2017	上海	3.3665	3.0589	3.9605	3.3031	27825	18090	190.76	0	2.33872	8.9	110.78	7246.6	6.5	0.403931	51	1587.19	51.49	456.53	72806	1.9	1013.2	上海	0.0392159	0.030727	0.0712418	0.0143319	0.0228296	0.00930875	0.060374	0.0591401	0.0165325	0.0612724	0.066526	0.0711679	0.0457619	0.0380191
2016	上海	29887	114.3	8570.2	21202.4	0.0473208	8.204	1.11011	9.49492	6.1444	上海	2016	上海	2.8222	2.7425	2.8148	3.0994	25520	17071	189.81	0.70968	2.48369	9.13	114.34	6755.88	7.1	0.389427	49	1528.79	51.47	327.41	64230	2.2	983.22	上海	0.0392159	0.030727	0.0712418	0.0143319	0.0228296	0.00930875	0.060374	0.0591401	0.0165325	0.0612724	0.066526	0.0711679	0.0457619	0.0380191
2015	上海	26887	125.5	8408.7	18352.8	0.043183	8.165	1.16209	9.48759	6.09018	上海	2015	上海	2.7811	2.5898	2.5981	3.7454	23205	16152	188.21	0.41463	2.94631	9.92	125.53	6352.7	7.2	0.369895	47	1125.16	51.16	267.37	60623	2.4	919.19	上海	0.0392159	0.030727	0.0712418	0.0143319	0.0228296	0.00930875	0.060374	0.0591401	0.0165325	0.0612724	0.066526	0.0711679	0.0457619	0.0380191
2014	上海	25269.8	132	8633.3	16504.5	0.0410973	8.063	1.3022	9.46846	6.03787	上海	2014	上海	2.3953	2.3702	2.4278	2.4188	21192	14820	184.09	0	3.14122	10.15	131.96	6016.43	9.8	0.368468	45	986.75	50.66	202.34	50488	2.6	885.64	上海	0.0392159	0.030727	0.0712418	0.0143319	0.0228296	0.00930875	0.060374	0.0591401	0.0165325	0.0612724	0.066526	0.0711679	0.0457619	0.0380191
2013	上海	23204.1	131.6	8286.5	14786	0.0413482	8.024	1.34231	9.44407	5.87577	上海	2013	上海	2.2214	1.8731	2.8093	2.303	19208	13016	184.09	0.30357	3.45763	10.78	131.6	5647.8	6.7	0.347559	43	821.43	50.48	187.25	48680	2.7	874.38	上海	0.0392159	0.030727	0.0712418	0.0143319	0.0228296	0.00930875	0.060374	0.0591401	0.0165325	0.0612724	0.066526	0.0711679	0.0457619	0.0380191
2012	上海	21305.6	129.3	8174.1	13002.1	0.0520958	8.4059	1.31444	9.43676	5.78352	上海	2012	上海	1.5077	1.4935	1.7472	1.1194	17452	10947	199.02	0.56463	3.56285	10.99	129.3	5117.62	7	0.331889	43	820.64	50.66	217.97	51508	2.9	208.98	上海	0.0392159	0.030727	0.0712418	0.0143319	0.0228296	0.00930875	0.060374	0.0591401	0.0165325	0.0612724	0.066526	0.0711679	0.0457619	0.0380191
2011	上海	20009.7	126.4	8169.3	11713.9	0.0412631	8.3461	1.30254	9.39964	6.14868	上海	2011	上海	0.8019	0.9885	0.8624	0.0758	15737	10103	199.61	0.3786	3.97455	11.97	126.4	4962.07	12.9	0.309978	41	753.11	51.13	161.54	47960	3	204.28	上海	0.0392159	0.030727	0.0712418	0.0143319	0.0228296	0.00930875	0.060374	0.0591401	0.0165325	0.0612724	0.066526	0.0711679	0.0457619	0.0380191
2022	江苏	122089	4964.2	54886.1	62239	0.0743797	8.373	4.01001	11.9703	8.59621	江苏	2022	江苏	4.2117	4.0493	4.5616	4.2167	28486	22597	3851.74	0.54684	1.43125	270.14	4964.2	65069.8	38.4	0.71268	970.1	4317.72	221.91	1108.36	560127	1447.3	542.02	江苏	0.0392159	0.030727	0.0712418	0.0143319	0.0228296	0.00930875	0.060374	0.0591401	0.0165325	0.0612724	0.066526	0.0711679	0.0457619	0.0380191
2021	江苏	117392	4721	52678.7	59992.7	0.0758437	8.355	3.73634	11.9706	8.48723	江苏	2021	江苏	4.0138	3.8313	4.2537	4.2125	26791	21130	3826.29	0.17327	1.45962	275.56	4721	62687.6	37.5	0.675192	959.9	4051.1	211.08	1106.2	640917	1560.7	520.22	江苏	0.0392159	0.030727	0.0712418	0.0143319	0.0228296	0.00930875	0.060374	0.0591401	0.0165325	0.0612724	0.066526	0.0711679	0.0457619	0.0380191
2020	江苏	102808	4537.6	44631.3	53638.9	0.0797607	8.171	3.53229	11.971	8.23324	江苏	2020	江苏	3.8161	3.6211	3.9501	4.217	24198	17022	4224.73	0.34513	1.43434	280.75	4537.6	59251.1	36.5	0.651008	950.69	4015.1	201.47	1091.25	499167	1416.4	479.61	江苏	0.0392159	0.030727	0.0712418	0.0143319	0.0228296	0.00930875	0.060374	0.0591401	0.0165325	0.0612724	0.066526	0.0711679	0.0457619	0.0380191
2019	江苏	98656.8	4297.2	43507.5	50852.1	0.0821065	8.169	3.21747	11.9825	8.24615	江苏	2019	江苏	3.6193	3.415	3.655	4.2292	22675	17716	4205.44	0.25914	1.45593	286.21	4297.2	59073.8	36.5	0.61966	940.39	3750.21	187.41	1032.37	314395	1368.3	1949.11	江苏	0.0392159	0.030727	0.0712418	0.0143319	0.0228296	0.00930875	0.060374	0.0591401	0.0165325	0.0612724	0.066526	0.0711679	0.0457619	0.0380191
2018	江苏	93207.6	4141.7	42129.4	46936.5	0.0854971	8.115	2.95579	11.975	8.19702	江苏	2018	江苏	3.3402	3.1195	3.3309	4.0862	20845	16567	4179.83	0.46684	1.49874	292.45	4141.71	56207.3	30.8	0.589264	930.24	3317.26	180.63	996.67	306996	1244.4	1933.14	江苏	0.0392159	0.030727	0.0712418	0.0143319	0.0228296	0.00930875	0.060374	0.0591401	0.0165325	0.0612724	0.066526	0.0711679	0.0457619	0.0380191
2017	江苏	85869.8	4045.2	39124.1	42700.5	0.086453	8.234	2.85093	11.9734	8.11734	江苏	2017	江苏	2.9769	2.7232	3.2893	3.2469	19158	15612	4131.88	0.64498	1.51388	303.85	4045.16	53277	30.8	0.570973	918.81	3449.27	176.79	918.22	227187	1152.9	1887.99	江苏	0.0392159	0.030727	0.0712418	0.0143319	0.0228296	0.00930875	0.060374	0.0591401	0.0165325	0.0612724	0.066526	0.0711679	0.0457619	0.0380191
2016	江苏	77350.9	4039.8	35041.5	38269.6	0.0987401	8.204	2.75677	11.9659	7.98586	江苏	2016	江苏	2.5375	2.3322	2.5308	3.228	17606	14428	4054.07	0.22119	1.55708	312.52	4039.75	49663.2	30.4	0.561015	907.89	2679.68	174.58	985.62	231033	1002.9	1869.27	江苏	0.0392159	0.030727	0.0712418	0.0143319	0.0228296	0.00930875	0.060374	0.0591401	0.0165325	0.0612724	0.066526	0.0711679	0.0457619	0.0380191
2015	江苏	71255.9	3952.5	33371.8	33931.7	0.104113	8.165	2.58222	11.9754	7.87265	江苏	2015	江苏	2.4401	2.1594	2.1862	3.8284	16257	12883	3952.5	0.4632	1.59439	319.99	3952.47	46246.9	29.9	0.542769	893.82	1989.92	171.57	1008.6	250290	881.8	1836.19	江苏	0.0392159	0.030727	0.0712418	0.0143319	0.0228296	0.00930875	0.060374	0.0591401	0.0165325	0.0612724	0.066526	0.0711679	0.0457619	0.0380191
2014	江苏	64830.5	3607.4	31048.8	30174.3	0.106145	8.063	2.25416	11.9673	7.76955	江苏	2014	江苏	2.0416	1.9318	2.0109	2.4602	14958	11820	3890.53	0.35968	1.63781	323.61	3607.4	41938.6	29.7	0.50004	899.66	1683.76	169.86	899.31	200032	588.2	1834.93	江苏	0.0392159	0.030727	0.0712418	0.0143319	0.0228296	0.00930875	0.060374	0.0591401	0.0165325	0.0612724	0.066526	0.0711679	0.0457619	0.0380191
2013	江苏	59349.4	3447.5	29149.4	26752.5	0.111347	8.024	2.09927	11.9582	7.65544	江苏	2013	江苏	1.8098	1.4468	2.2309	2.243	13521	10759	3785.27	0.39704	1.7246	326.83	3447.49	36373.3	29.6	0.476933	765.84	1446.08	168.45	868.34	239645	575.2	1801.86	江苏	0.0392159	0.030727	0.0712418	0.0143319	0.0228296	0.00930875	0.060374	0.0591401	0.0165325	0.0612724	0.066526	0.0711679	0.0457619	0.0380191
2012	江苏	53701.9	3241.4	27150.8	23309.8	0.107303	8.4059	1.92491	11.9455	7.51861	江苏	2012	江苏	1.2203	1.0669	1.5655	1.0994	12133	9921	3929.72	0.53104	1.79594	330.95	3241.4	30854.2	28.7	0.44924	1191.92	1301.28	167.12	754.09	269944	539.5	1696.41	江苏	0.0392159	0.030727	0.0712418	0.0143319	0.0228296	0.00930875	0.060374	0.0591401	0.0165325	0.0612724	0.066526	0.0711679	0.0457619	0.0380191
2011	江苏	48839.2	2908.8	25231.2	20699.2	0.0993503	8.3461	1.71161	11.9333	7.40586	江苏	2011	江苏	0.6208	0.667	0.7922	0.1571	10744	8788	3817.92	0.32235	1.8286	337.21	2908.8	26692.6	28.6	0.406396	1110.23	1200.02	165.94	618.13	199814	406.1	1606.83	江苏	0.0392159	0.030727	0.0712418	0.0143319	0.0228296	0.00930875	0.060374	0.0591401	0.0165325	0.0612724	0.066526	0.0711679	0.0457619	0.0380191
2022	浙江	78060.6	2185.2	32973.8	42901.6	0.0691642	8.373	2.14295	11.7193	8.41775	浙江	2022	浙江	4.4719	4.2314	5.1035	4.1361	37565	27483	1226.14	0.43102	1.14687	67.05	2185.2	47576.5	37.3	1.18244	3744.64	2713.01	125.33	831.2	443985	1221.9	575.63	浙江	0.0392159	0.030727	0.0712418	0.0143319	0.0228296	0.00930875	0.060374	0.0591401	0.0165325	0.0612724	0.066526	0.0711679	0.0457619	0.0380191
2021	浙江	74040.8	2211.7	31174	40655.1	0.0722015	8.355	2.0018	11.7271	8.38432	浙江	2021	浙江	4.2685	4.0249	4.7445	4.2134	35247	25415	1260.54	0.25452	1.13584	68.26	2211.7	43608.1	37.3	1.13025	3702.58	2484.66	121.03	795.27	465468	925.3	424.46	浙江	0.0392159	0.030727	0.0712418	0.0143319	0.0228296	0.00930875	0.060374	0.0591401	0.0165325	0.0612724	0.066526	0.0711679	0.0457619	0.0380191
2020	浙江	64689.1	2166.3	26361.5	36161.3	0.0758668	8.171	1.94609	11.7206	8.36483	浙江	2020	浙江	4.0688	3.8207	4.3925	4.2998	31930	21555	1415.7	0.38826	1.11104	69.61	2166.3	39357.5	38.3	1.10271	3659.68	2476.94	114.87	764.89	391700	892.7	343.02	浙江	0.0392159	0.030727	0.0712418	0.0143319	0.0228296	0.00930875	0.060374	0.0591401	0.0165325	0.0612724	0.066526	0.0711679	0.0457619	0.0380191
2019	浙江	62462	2086.7	26299.5	34075.8	0.0740314	8.169	1.91182	11.7102	8.383	浙江	2019	浙江	3.8749	3.624	4.0465	4.3916	29876	21352	1405.43	0.34652	1.048	72.5	2086.7	37341.1	38.2	1.06815	3611.39	2251.45	107.47	744.24	285342	922.5	1026.73	浙江	0.0392159	0.030727	0.0712418	0.0143319	0.0228296	0.00930875	0.060374	0.0591401	0.0165325	0.0612724	0.066526	0.0711679	0.0457619	0.0380191
2018	浙江	58002.8	1975.9	25308.1	30718.8	0.0839513	8.115	1.6785	11.7007	8.37591	浙江	2018	浙江	3.5745	3.3017	3.7201	4.2107	27302	19707	1440.8	0.63642	0.984746	77.76	1975.89	33946.4	36.7	1.02053	3692.54	1953.88	101.94	724.46	284621	902.3	1008.31	浙江	0.0392159	0.030727	0.0712418	0.0143319	0.0228296	0.00930875	0.060374	0.0591401	0.0165325	0.0612724	0.066526	0.0711679	0.0457619	0.0380191
2017	浙江	52403.1	1933.9	23246.7	27222.5	0.092518	8.234	1.61281	11.6961	8.32855	浙江	2017	浙江	3.1805	2.9006	3.664	3.2266	24956	18093	1444.7	0.50047	0.95601	82.63	1933.92	31696	38.3	0.995805	3721.06	1844.41	100.23	696.69	213805	604.2	976.65	浙江	0.0392159	0.030727	0.0712418	0.0143319	0.0228296	0.00930875	0.060374	0.0591401	0.0165325	0.0612724	0.066526	0.0711679	0.0457619	0.0380191
2016	浙江	47254	1890.4	21571.3	23792.4	0.103582	8.204	1.55025	11.6873	8.21344	浙江	2016	浙江	2.681	2.5444	2.7062	3.0866	22866	17359	1446.31	0.37675	0.91097	84.48	1890.43	30276.1	39.3	0.989232	3699.86	1527.65	99.61	722.41	221456	495.2	926.09	浙江	0.0392159	0.030727	0.0712418	0.0143319	0.0228296	0.00930875	0.060374	0.0591401	0.0165325	0.0612724	0.066526	0.0711679	0.0457619	0.0380191
2015	浙江	43507.7	1771.4	20606.6	21129.8	0.111207	8.165	1.41149	11.6786	8.09016	浙江	2015	浙江	2.6485	2.3933	2.5129	3.7377	21125	16108	1432.15	0.46796	0.837792	87.52	1771.36	27323.3	39	0.912023	3655.4	1207.08	99.11	739.08	234983	503.6	905.56	浙江	0.0392159	0.030727	0.0712418	0.0143319	0.0228296	0.00930875	0.060374	0.0591401	0.0165325	0.0612724	0.066526	0.0711679	0.0457619	0.0380191
2014	浙江	40023.5	1726.6	19580.7	18716.2	0.101673	8.063	1.34385	11.6645	7.97322	浙江	2014	浙江	2.2445	2.1748	2.3367	2.3071	19373	14498	1425.37	0.48431	0.820935	89.62	1726.57	24262.8	39	0.883847	3644.48	1051.08	97.82	524.59	188544	405.1	905.34	浙江	0.0392159	0.030727	0.0712418	0.0143319	0.0228296	0.00930875	0.060374	0.0591401	0.0165325	0.0612724	0.066526	0.0711679	0.0457619	0.0380191
2013	浙江	37334.6	1718.7	18162.8	17453.1	0.108452	8.024	1.33275	11.6564	7.80454	浙江	2013	浙江	2.0577	1.6796	2.6548	2.2212	17494	12803	1409.39	0.44208	0.837645	92.43	1718.74	20782.1	39.5	0.846421	3645.59	1109.92	95.96	513.03	202350	540.4	904.91	浙江	0.0392159	0.030727	0.0712418	0.0143319	0.0228296	0.00930875	0.060374	0.0591401	0.0165325	0.0612724	0.066526	0.0711679	0.0457619	0.0380191
2012	浙江	34382.4	1610.8	17040.5	15731.1	0.0980807	8.4059	1.23996	11.64	7.66753	浙江	2012	浙江	1.4635	1.285	2.0042	1.0707	15806	11598	1471.02	0.45724	0.841837	92.15	1610.81	17649.4	39.8	0.780562	2515.46	819.88	93.23	408.2	188463	488.2	869.87	浙江	0.0392159	0.030727	0.0712418	0.0143319	0.0228296	0.00930875	0.060374	0.0591401	0.0165325	0.0612724	0.066526	0.0711679	0.0457619	0.0380191
2011	浙江	31854.8	1535.2	16271	14048.6	0.0971532	8.3461	1.19099	11.6243	7.29329	浙江	2011	浙江	0.7739	0.8553	0.9352	0.2122	14197	10849	1456.8	0.36952	0.921418	92.07	1535.2	14185.3	36.3	0.687041	2457.64	730.67	90.75	373.32	130190	426	848	浙江	0.0392159	0.030727	0.0712418	0.0143319	0.0228296	0.00930875	0.060374	0.0591401	0.0165325	0.0612724	0.066526	0.0711679	0.0457619	0.0380191
2022	安徽	44607.7	3516.5	17946.8	23144.4	0.118366	8.373	2.57189	12.3799	8.13856	安徽	2022	安徽	3.9134	3.6968	4.1664	4.1366	19575	17980	4576.18	0.18263	1.26357	280.19	3516.5	44792.9	45.9	0.416663	2284.94	1418.24	155.35	991.88	156584	945.9	305.92	安徽	0.0392159	0.030727	0.0712418	0.0143319	0.0228296	0.00930875	0.060374	0.0591401	0.0165325	0.0612724	0.066526	0.0711679	0.0457619	0.0380191
2021	安徽	42565.2	3363.9	17240.1	21961.1	0.124166	8.355	2.41914	12.3775	8.22932	安徽	2021	安徽	3.7037	3.4656	3.9114	4.1098	18372	17163	4509.87	0.21142	1.28342	284.73	3363.9	41094.4	47.5	0.399324	2219	1379.67	150.5	942.55	153475	926.8	280.41	安徽	0.0392159	0.030727	0.0712418	0.0143319	0.0228296	0.00930875	0.060374	0.0591401	0.0165325	0.0612724	0.066526	0.0711679	0.0457619	0.0380191
2020	安徽	38061.5	3185	15216.5	19660.1	0.123674	8.171	2.23306	12.3736	8.08079	安徽	2020	安徽	3.5016	3.2375	3.6615	4.0838	16620	15024	4608.83	0.63002	1.29686	289.9	3184.68	37563.4	46.8	0.380325	2157	1403.53	136.85	924.29	119696	802.1	268.17	安徽	0.0392159	0.030727	0.0712418	0.0143319	0.0228296	0.00930875	0.060374	0.0591401	0.0165325	0.0612724	0.066526	0.0711679	0.0457619	0.0380191
2019	安徽	36845.5	2916	14970	18959.5	0.0996007	8.169	1.97178	12.2936	8.07512	安徽	2019	安徽	3.3029	3.0115	3.4153	4.0611	15416	14546	4580.84	0.54906	1.3205	298.02	2915.97	35740.6	49.7	0.349489	2084.46	1348.65	124.12	736.27	82524	705.9	189.15	安徽	0.0392159	0.030727	0.0712418	0.0143319	0.0228296	0.00930875	0.060374	0.0591401	0.0165325	0.0612724	0.066526	0.0711679	0.0457619	0.0380191
2018	安徽	34010.9	2638	14094.4	17278.5	0.10725	8.115	1.73384	12.2493	7.76989	安徽	2018	安徽	3.0383	2.7341	3.0962	3.9379	13996	12748	4538.29	0.54263	1.34037	311.8	2638	32729.5	44.9	0.316494	1989.18	1209.73	113.91	704.86	79747	640.4	180.79	安徽	0.0392159	0.030727	0.0712418	0.0143319	0.0228296	0.00930875	0.060374	0.0591401	0.0165325	0.0612724	0.066526	0.0711679	0.0457619	0.0380191
2017	安徽	29676.2	2582.3	12681.2	14412.7	0.109918	8.234	1.66051	12.2224	7.68855	安徽	2017	安徽	2.716	2.347	3.0955	3.2448	12758	11106	4504.14	0.50425	1.38237	318.72	2582.27	29275.1	44.8	0.310233	1940.33	1107.36	114.74	681.91	58213	422.8	171.31	安徽	0.0392159	0.030727	0.0712418	0.0143319	0.0228296	0.00930875	0.060374	0.0591401	0.0165325	0.0612724	0.066526	0.0711679	0.0457619	0.0380191
2016	安徽	26307.7	2489.8	11517.5	12300.5	0.113133	8.204	1.55085	12.1939	7.56812	安徽	2016	安徽	2.2878	1.9489	2.2995	3.3854	11720	10287	4437.46	0.41575	1.27996	327.01	2489.76	27033.4	44.8	0.29622	1901.79	873.7	114.5	624.83	60983	300.7	161.62	安徽	0.0392159	0.030727	0.0712418	0.0143319	0.0228296	0.00930875	0.060374	0.0591401	0.0165325	0.0612724	0.066526	0.0711679	0.0457619	0.0380191
2015	安徽	23831.2	2376.1	10838.3	10616.8	0.110277	8.165	1.41946	12.1385	7.44996	安徽	2015	安徽	2.1128	1.7165	1.8978	3.8123	10821	8975	4400.34	0.57536	1.45849	338.69	2376.05	24386	44.4	0.257056	1857.42	698.92	113.07	577.74	59039	257.8	156.75	安徽	0.0392159	0.030727	0.0712418	0.0143319	0.0228296	0.00930875	0.060374	0.0591401	0.0165325	0.0612724	0.066526	0.0711679	0.0457619	0.0380191
2014	安徽	22519.7	2295	10982.6	9242.1	0.107779	8.063	1.32375	12.069	7.31315	安徽	2014	安徽	1.8059	1.5656	1.7384	2.7222	9916	7981	4331.69	0.38983	1.49237	341.39	2294.95	21875.6	45.4	0.250553	1702.02	572.29	108.05	502.69	48380	143.7	147.53	安徽	0.0392159	0.030727	0.0712418	0.0143319	0.0228296	0.00930875	0.060374	0.0591401	0.0165325	0.0612724	0.066526	0.0711679	0.0457619	0.0380191
2013	安徽	20584	2173.2	10233.4	8177.4	0.109932	8.024	1.22317	12.0654	7.08849	安徽	2013	安徽	1.5083	1.0651	1.9086	2.2445	8850	7200	4305.53	0.28801	1.52516	338.4	2173.16	18621.9	42.9	0.240291	1654.51	483.01	105.21	478.17	48849	142	138.39	安徽	0.0392159	0.030727	0.0712418	0.0143319	0.0228296	0.00930875	0.060374	0.0591401	0.0165325	0.0612724	0.066526	0.0711679	0.0457619	0.0380191
2012	安徽	18341.7	2018.6	9247.9	7075.2	0.108677	8.4059	1.10663	12.0147	6.92245	安徽	2012	安徽	0.9663	0.6606	1.3806	1.2231	7826	6988	3585.09	0.48226	1.58168	333.53	2018.57	15425.8	42.5	0.223686	2245.01	453.61	102.3	430.47	43321	129.7	128.8	安徽	0.0392159	0.030727	0.0712418	0.0143319	0.0228296	0.00930875	0.060374	0.0591401	0.0165325	0.0612724	0.066526	0.0711679	0.0457619	0.0380191
2011	安徽	16284.9	1868	8189.1	6227.8	0.106531	8.3461	0.999876	11.9153	6.73281	安徽	2011	安徽	0.3307	0.202	0.5558	0.3466	6811	6235	3547.65	0.1507	1.6603	329.67	1867.99	12455.7	41.7	0.205612	2180.33	432.3	99.13	351.87	32681	113.3	117.28	安徽	0.0392159	0.030727	0.0712418	0.0143319	0.0228296	0.00930875	0.060374	0.0591401	0.0165325	0.0612724	0.066526	0.0711679	0.0457619	0.0380191
2022	福建	51765.1	3077.6	23125.3	25562.2	0.0721058	8.373	4.39853	11.6341	7.92277	福建	2022	福建	4.2096	3.9893	4.7974	3.9125	24987	20467	855.47	0.21246	1.29724	92.07	3077.6	35401.1	38.7	1.89752	4279.05	1104.21	107.61	410.37	141536	762.8	277.45	福建	0.0392159	0.030727	0.0712418	0.0143319	0.0228296	0.00930875	0.060374	0.0591401	0.0165325	0.0612724	0.066526	0.0711679	0.0457619	0.0380191
2021	福建	49566.1	2899.9	23319.8	23346.3	0.070438	8.355	4.09958	11.6176	7.90308	福建	2021	福建	4.0026	3.7876	4.4074	4.0027	23229	19290	825.77	0.35106	1.30015	96.63	2899.9	32931.2	38.8	1.82048	4146.54	1051.79	102.34	366.61	153814	601.4	311.73	福建	0.0392159	0.030727	0.0712418	0.0143319	0.0228296	0.00930875	0.060374	0.0591401	0.0165325	0.0612724	0.066526	0.0711679	0.0457619	0.0380191
2020	福建	43608.6	2730.8	20168.4	20709.3	0.0862809	8.171	3.76916	11.6093	7.80294	福建	2020	福建	3.8013	3.5921	4.018	4.0982	20880	16339	1110.42	0.32312	1.29445	100.81	2730.8	31067.2	38.3	1.73595	4031.8	1005.79	94.72	450.05	145928	577.6	294.62	福建	0.0392159	0.030727	0.0712418	0.0143319	0.0228296	0.00930875	0.060374	0.0591401	0.0165325	0.0612724	0.066526	0.0711679	0.0457619	0.0380191
2019	福建	42326.6	2595.5	20065.5	19665.6	0.0870552	8.169	3.48876	11.6063	7.83597	福建	2019	福建	3.6051	3.4065	3.6373	4.2025	19568	16281	1076.78	0.4606	1.29212	106.26	2595.5	31191.9	38	1.68268	3895.94	948.09	86.12	442.06	98955	788.5	417.92	福建	0.0392159	0.030727	0.0712418	0.0143319	0.0228296	0.00930875	0.060374	0.0591401	0.0165325	0.0612724	0.066526	0.0711679	0.0457619	0.0380191
2018	福建	38687.8	2379	18847.8	17461	0.0892898	8.115	3.12142	11.5982	7.24566	福建	2018	福建	3.3444	3.1231	3.343	4.0776	17821	14943	1085.18	0.61499	1.28417	110.74	2379.02	29454.2	35.5	1.56234	3778.43	871.8	77.24	431.51	102622	568	403.87	福建	0.0392159	0.030727	0.0712418	0.0143319	0.0228296	0.00930875	0.060374	0.0591401	0.0165325	0.0612724	0.066526	0.0711679	0.0457619	0.0380191
2017	福建	33842.4	2215.1	16290	15337.3	0.0955776	8.234	2.83764	11.59	7.1452	福建	2017	福建	2.9928	2.754	3.3433	3.1447	16335	14003	1064.84	0.45217	1.25715	116.32	2215.13	26416.3	35.1	1.48089	3651.69	831.84	75.1	447.7	68304	460	388.38	福建	0.0392159	0.030727	0.0712418	0.0143319	0.0228296	0.00930875	0.060374	0.0591401	0.0165325	0.0612724	0.066526	0.0711679	0.0457619	0.0380191
2016	福建	29609.4	2145.1	14683.7	12780.6	0.0960331	8.204	2.64632	11.5783	7.06715	福建	2016	福建	2.5267	2.4047	2.4512	3.067	14999	12911	1055.37	0.50091	1.2204	123.84	2145.1	23237.3	35.5	1.43401	3579.01	754.91	75.64	410.58	67142	356.6	384.45	福建	0.0392159	0.030727	0.0712418	0.0143319	0.0228296	0.00930875	0.060374	0.0591401	0.0165325	0.0612724	0.066526	0.0711679	0.0457619	0.0380191
2015	福建	26819.5	1932.8	13735.7	11150.9	0.110421	8.165	2.32034	11.5578	6.96357	福建	2015	福建	2.4521	2.266	1.9823	3.9201	13793	11961	1061.65	0.56813	1.16837	123.8	1932.84	21301.4	35.9	1.23871	3399.27	631.22	75.85	441.86	61621	342.2	381.06	福建	0.0392159	0.030727	0.0712418	0.0143319	0.0228296	0.00930875	0.060374	0.0591401	0.0165325	0.0612724	0.066526	0.0711679	0.0457619	0.0380191
2014	福建	24942.1	1855.9	13165.1	9921.2	0.09687	8.063	2.16618	11.5248	6.83195	福建	2014	福建	2.0259	2.0422	1.6485	2.6576	12650	11056	1116.12	0.5731	1.22057	122.61	1855.85	18177.9	35.2	1.15	3388.34	554.61	74.85	320.32	37857	307.8	367.67	福建	0.0392159	0.030727	0.0712418	0.0143319	0.0228296	0.00930875	0.060374	0.0591401	0.0165325	0.0612724	0.066526	0.0711679	0.0457619	0.0380191
2013	福建	22503.8	1745.2	11805.5	8953.2	0.10174	8.024	2.00746	11.5083	6.70747	福建	2013	福建	1.831	1.5743	1.9412	2.4785	11405	9986	1122.42	0.5336	1.30237	120.57	1745.18	15327.4	28.7	1.0369	3260.96	574.84	73.05	312.22	37511	240.2	346.68	福建	0.0392159	0.030727	0.0712418	0.0143319	0.0228296	0.00930875	0.060374	0.0591401	0.0165325	0.0612724	0.066526	0.0711679	0.0457619	0.0380191
2012	福建	20190.7	1628.9	10527	8034.8	0.0936376	8.4059	1.81924	11.4581	6.54103	福建	2012	福建	1.2321	1.1274	1.4025	1.2679	10164	9068	968.51	0.54426	1.36869	120.87	1628.94	12439.9	27.3	0.95632	1485.39	384.78	70.14	244.16	30497	217.6	312.85	福建	0.0392159	0.030727	0.0712418	0.0143319	0.0228296	0.00930875	0.060374	0.0591401	0.0165325	0.0612724	0.066526	0.0711679	0.0457619	0.0380191
2011	福建	17917.7	1492.2	9316.6	7109	0.0945737	8.3461	1.64957	11.433	6.4825	福建	2011	福建	0.6176	0.6328	0.6851	0.445	8952	8013	967.48	0.36289	1.5022	120.93	1492.21	9910.89	27.6	0.82178	1493.12	350.38	67.48	207.89	21857	177.7	270.58	福建	0.0392159	0.030727	0.0712418	0.0143319	0.0228296	0.00930875	0.060374	0.0591401	0.0165325	0.0612724	0.066526	0.0711679	0.0457619	0.0380191
2022	江西	31213.8	2466.5	13483	15264.4	0.108173	8.373	2.45934	12.2582	7.62095	江西	2022	江西	3.861	3.6146	4.22	3.9505	19936	16984	2166.49	0.47225	2.01911	107.71	2466.5	34884.9	50.8	0.449835	6468.49	972.47	146.44	788.48	75830	620.5	186.49	江西	0.0392159	0.030727	0.0712418	0.0143319	0.0228296	0.00930875	0.060374	0.0591401	0.0165325	0.0612724	0.066526	0.0711679	0.0457619	0.0380191
2021	江西	29827.8	2334.1	13230.7	14263	0.112446	8.355	2.29642	12.2601	7.56735	江西	2021	江西	3.6296	3.3839	3.8735	3.9644	18684	15663	2158.03	0.3213	2.10471	108.59	2334.1	32122.4	50.7	0.42976	6333.42	909.6	134.87	762.26	97372	556.8	167.16	江西	0.0392159	0.030727	0.0712418	0.0143319	0.0228296	0.00930875	0.060374	0.0591401	0.0165325	0.0612724	0.066526	0.0711679	0.0457619	0.0380191
2020	江西	25782	2243.8	11107.9	12430.2	0.110923	8.171	2.13684	12.2579	7.39339	江西	2020	江西	3.4061	3.1614	3.5323	3.9852	16981	13579	2038.49	0.34383	2.17841	108.81	2243.8	28991.3	51.3	0.412464	6195.89	927.86	124.2	740.31	80239	518.5	160.81	江西	0.0392159	0.030727	0.0712418	0.0143319	0.0228296	0.00930875	0.060374	0.0591401	0.0165325	0.0612724	0.066526	0.0711679	0.0457619	0.0380191
2019	江西	24667.3	2057.7	10820.3	11789.3	0.0970439	8.169	1.88343	12.2507	7.26263	江西	2019	江西	3.1913	2.9432	3.1918	4.0097	15796	12497	2036.14	0.55518	2.2347	115.57	2057.7	26794.2	54.4	0.386838	6070.46	835.19	113.5	619.8	59140	460.9	119.24	江西	0.0392159	0.030727	0.0712418	0.0143319	0.0228296	0.00930875	0.060374	0.0591401	0.0165325	0.0612724	0.066526	0.0711679	0.0457619	0.0380191
2018	江西	22716.5	1877.3	10081.2	10758	0.105762	8.115	1.63523	11.995	7.06193	江西	2018	江西	2.9623	2.6646	2.9652	3.94	14460	10885	2032.02	0.68476	2.33244	123.2	1877.33	24536.8	51.2	0.350606	5917.85	754.02	105.44	599.41	52819	415.3	112.47	江西	0.0392159	0.030727	0.0712418	0.0143319	0.0228296	0.00930875	0.060374	0.0591401	0.0165325	0.0612724	0.066526	0.0711679	0.0457619	0.0380191
2017	江西	20210.8	1835.3	9444.6	8930.9	0.118891	8.234	1.53559	11.9971	7.15524	江西	2017	江西	2.6717	2.2852	3.0592	3.2438	13242	9870	2039.42	0.69937	2.44131	134.97	1835.26	22085.3	45.9	0.336705	5787.3	727.29	104.83	607.71	33029	309.3	108.5	江西	0.0392159	0.030727	0.0712418	0.0143319	0.0228296	0.00930875	0.060374	0.0591401	0.0165325	0.0612724	0.066526	0.0711679	0.0457619	0.0380191
2016	江西	18388.6	1794.1	8732.5	7862	0.125807	8.204	1.45997	11.9948	7.04124	江西	2016	江西	2.2376	1.8879	2.2274	3.4108	12138	9128	2036.83	0.5007	2.57487	141.97	1794.12	19694.2	46.7	0.326678	5674.9	608.72	103.9	580.9	31472	244	104.58	江西	0.0392159	0.030727	0.0712418	0.0143319	0.0228296	0.00930875	0.060374	0.0591401	0.0165325	0.0612724	0.066526	0.0711679	0.0457619	0.0380191
2015	江西	16780.9	1714.5	8367.7	6698.8	0.126299	8.165	1.31286	11.9616	6.9181	江西	2015	江西	2.0835	1.7086	1.8248	3.7914	11139	8486	2027.67	0.72787	2.51608	143.58	1714.47	17388.1	47.4	0.311845	5577.9	508.43	98.45	557.3	24161	202.9	99.92	江西	0.0392159	0.030727	0.0712418	0.0143319	0.0228296	0.00930875	0.060374	0.0591401	0.0165325	0.0612724	0.066526	0.0711679	0.0457619	0.0380191
2014	江西	15667.8	1626.9	8238.7	5802.3	0.128815	8.063	1.20538	11.9545	6.79257	江西	2014	江西	1.7569	1.4873	1.6719	2.8018	10117	7548	2001.57	0.67502	2.67531	142.87	1626.87	15079.3	47.8	0.296841	5351.64	400.37	91.64	500.15	13831	111.6	97.62	江西	0.0392159	0.030727	0.0712418	0.0143319	0.0228296	0.00930875	0.060374	0.0591401	0.0165325	0.0612724	0.066526	0.0711679	0.0457619	0.0380191
2013	江西	14300.2	1540.7	7661.9	5097.7	0.126369	8.024	1.10915	11.9321	6.64053	江西	2013	江西	1.4613	0.9981	1.8373	2.3078	9089	6807	1995.6	0.57783	2.79872	141.58	1540.65	12850.3	48	0.282368	5128.8	317.95	86.18	438.54	9970	103.9	90.9	江西	0.0392159	0.030727	0.0712418	0.0143319	0.0228296	0.00930875	0.060374	0.0591401	0.0165325	0.0612724	0.066526	0.0711679	0.0457619	0.0380191
2012	江西	12807.7	1439.1	6893.3	4475.2	0.12744	8.4059	1.00229	11.9223	6.51471	江西	2012	江西	0.9193	0.5982	1.3268	1.2392	8103	6176	1907.06	0.59065	1.21679	141.26	1439.14	10774.2	48.5	0.265222	4822.4	271.72	85.11	384.77	7985	92.1	84.62	江西	0.0392159	0.030727	0.0712418	0.0143319	0.0228296	0.00930875	0.060374	0.0591401	0.0165325	0.0612724	0.066526	0.0711679	0.0457619	0.0380191
2011	江西	11584.5	1320.5	6338	3926	0.113623	8.3461	0.896185	11.8957	6.39393	江西	2011	江西	0.2974	0.1397	0.5482	0.3621	7133	5611	1867.67	0.39682	1.32056	140.77	1320.49	9087.6	49.4	0.245799	4626.8	252.23	82.86	287.99	5550	73.3	77.26	江西	0.0392159	0.030727	0.0712418	0.0143319	0.0228296	0.00930875	0.060374	0.0591401	0.0165325	0.0612724	0.066526	0.0711679	0.0457619	0.0380191
2022	山东	87576.9	6296.5	34562.3	46718.1	0.0922495	8.373	3.36655	12.5837	8.57144	山东	2022	山东	3.8983	3.7671	3.9439	4.2555	22110	14687	5209.09	0.29231	0.950882	362.09	6296.5	61466	40.6	0.617376	4722.48	2907.84	252.71	1118.86	342290	1147.9	463.2	山东	0.0392159	0.030727	0.0712418	0.0143319	0.0228296	0.00930875	0.060374	0.0591401	0.0165325	0.0612724	0.066526	0.0711679	0.0457619	0.0380191
2021	山东	82875.2	6029	32834.5	44011.7	0.0876749	8.355	3.1271	12.5712	8.6365	山东	2021	山东	3.6844	3.5408	3.6849	4.1725	20794	14299	5069.92	0.17663	0.97877	371.03	6029.03	57932.1	41.6	0.589071	4583.12	2816.49	242.99	1026.95	329838	1127.6	507.75	山东	0.0392159	0.030727	0.0712418	0.0143319	0.0228296	0.00930875	0.060374	0.0591401	0.0165325	0.0612724	0.066526	0.0711679	0.0457619	0.0380191
2020	山东	72798.2	5364.4	28456.7	38977.2	0.0948314	8.171	2.71339	12.5666	8.55564	山东	2020	山东	3.4781	3.3166	3.4349	4.09	18753	12660	5293.56	0.23234	0.993105	380.88	5364.4	54653	42.7	0.528062	4430.25	2971.55	229.15	1065.29	238778	1070.9	485.14	山东	0.0392159	0.030727	0.0712418	0.0143319	0.0228296	0.00930875	0.060374	0.0591401	0.0165325	0.0612724	0.066526	0.0711679	0.0457619	0.0380191
2019	山东	70540.5	5117	28171.8	37251.7	0.100187	8.169	2.50951	12.5437	8.61234	山东	2019	山东	3.2736	3.0997	3.1854	4.0084	17775	12309	5271.37	0.51115	1.02371	395.34	5117	52753.8	41.6	0.500965	4277.56	2750.99	218.39	1075.98	146481	1017	435.92	山东	0.0392159	0.030727	0.0712418	0.0143319	0.0228296	0.00930875	0.060374	0.0591401	0.0165325	0.0612724	0.066526	0.0711679	0.0457619	0.0380191
2018	山东	66648.9	4950.5	27523.7	34174.7	0.098852	8.115	2.41951	12.5269	8.83714	山东	2018	山东	3.0113	2.8199	2.8785	3.8848	16297	11270	5235.99	0.58396	1.06352	420.35	4950.52	57466	38.4	0.476121	4142.96	2519.83	204.08	998.5	132382	951.3	416.24	山东	0.0392159	0.030727	0.0712418	0.0143319	0.0228296	0.00930875	0.060374	0.0591401	0.0165325	0.0612724	0.066526	0.0711679	0.0457619	0.0380191
2017	山东	63012.1	4832.7	26925.6	31253.8	0.102997	8.234	2.32343	12.5084	8.82975	山东	2017	山东	2.7206	2.4719	2.9092	3.1992	15118	10342	5191.06	0.36329	1.09501	439.96	4832.71	55202.7	38.5	0.460461	4005.43	2341.09	201.53	953.59	100522	844.6	488.45	山东	0.0392159	0.030727	0.0712418	0.0143319	0.0228296	0.00930875	0.060374	0.0591401	0.0165325	0.0612724	0.066526	0.0711679	0.0457619	0.0380191
2016	山东	58762.5	4830.3	25565	28367.2	0.107758	8.204	2.22652	12.4902	8.73197	山东	2016	山东	2.3257	2.098	2.1781	3.3458	13954	9519	5161.16	0.41344	1.15116	456.46	4830.25	53322.9	38.9	0.449727	3879.4	1963.32	199.59	943.44	98093	729.3	488.84	山东	0.0392159	0.030727	0.0712418	0.0143319	0.0228296	0.00930875	0.060374	0.0591401	0.0165325	0.0612724	0.066526	0.0711679	0.0457619	0.0380191
2015	山东	55288.8	4902.8	24814.9	25571.1	0.116899	8.165	2.18702	12.4816	8.6273	山东	2015	山东	2.2066	1.9211	1.7815	3.9216	12930	8748	4964.43	0.48129	0.852317	463.5	4902.82	48312.4	39.8	0.449064	3776.71	1543.49	190.06	964.42	98101	601.7	482.3	山东	0.0392159	0.030727	0.0712418	0.0143319	0.0228296	0.00930875	0.060374	0.0591401	0.0165325	0.0612724	0.066526	0.0711679	0.0457619	0.0380191
2014	山东	50774.8	4662.8	23588	22524	0.107678	8.063	2.02619	12.4666	8.51951	山东	2014	山东	1.8188	1.6989	1.6119	2.5908	11882	7962	4901.95	0.38054	0.863774	468.08	4662.81	42495.6	40	0.429217	3612.46	1251.79	179.67	772.84	72818	453.5	480.04	山东	0.0392159	0.030727	0.0712418	0.0143319	0.0228296	0.00930875	0.060374	0.0591401	0.0165325	0.0612724	0.066526	0.0711679	0.0457619	0.0380191
2013	山东	47344.3	4454.1	22615.9	20274.3	0.11185	8.024	1.89089	12.4403	8.38279	山东	2013	山东	1.593	1.2201	1.8907	2.2832	10687	6877	4729.03	0.36307	0.874158	472.66	4454.11	36789.1	39.5	0.415817	3477.46	1280.43	169.85	748.14	76976	448.8	471.38	山东	0.0392159	0.030727	0.0712418	0.0143319	0.0228296	0.00930875	0.060374	0.0591401	0.0165325	0.0612724	0.066526	0.0711679	0.0457619	0.0380191
2012	山东	42957.3	4047.1	21275.9	17634.4	0.114119	8.4059	1.67873	12.4073	8.23541	山东	2012	山东	1.0035	0.8015	1.2753	1.1768	9506	6304	5058.11	0.31362	0.874588	476.26	4047.06	31256	39.2	0.386494	4781.26	967.75	165.85	673.82	75496	402.9	465.79	山东	0.0392159	0.030727	0.0712418	0.0143319	0.0228296	0.00930875	0.060374	0.0591401	0.0165325	0.0612724	0.066526	0.0711679	0.0457619	0.0380191
2011	山东	39064.9	3768.6	19926.1	15370.3	0.112753	8.3461	1.53951	12.3596	8.10186	山东	2011	山东	0.3855	0.3367	0.4716	0.3901	8395	5489	4986.88	0.1963	0.891274	473.64	3768.55	26749.7	39.2	0.362548	4722.49	890.31	164.56	564	58844	301.3	456.52	山东	0.0392159	0.030727	0.0712418	0.0143319	0.0228296	0.00930875	0.060374	0.0591401	0.0165325	0.0612724	0.066526	0.0711679	0.0457619	0.0380191
2022	河南	58220.1	5731.3	22140.6	30348.2	0.104302	8.373	2.58368	12.5335	8.31312	河南	2022	河南	3.8015	3.7602	3.614	4.2335	18697	14824	5623.22	0.09804	1.35482	595.31	5731.3	60415	48.4	0.419386	4269.67	2369.53	282.33	1110.48	135990	1109.6	505.53	河南	0.0392159	0.030727	0.0712418	0.0143319	0.0228296	0.00930875	0.060374	0.0591401	0.0165325	0.0612724	0.066526	0.0711679	0.0457619	0.0380191
2021	河南	58071.4	5626.9	23566.4	28878.2	0.10376	8.355	2.43987	12.512	8.34091	河南	2021	河南	3.6018	3.5357	3.4104	4.1573	17533	14073	5518.24	0.42315	1.38074	624.66	5626.9	56621.3	49.1	0.402268	4141.81	2360.03	268.64	1015.22	158038	997.8	451.43	河南	0.0392159	0.030727	0.0712418	0.0143319	0.0228296	0.00930875	0.060374	0.0591401	0.0165325	0.0612724	0.066526	0.0711679	0.0457619	0.0380191
2020	河南	54259.4	5354	22220.9	26684.5	0.110425	8.171	2.24698	12.5072	8.30187	河南	2020	河南	3.4081	3.3116	3.2121	4.0832	16108	12201	5463.07	0.21703	1.40371	647.98	5354.02	54183.1	49.6	0.381298	4033.79	2506	249.22	1145.4	122809	901.7	426.52	河南	0.0392159	0.030727	0.0712418	0.0143319	0.0228296	0.00930875	0.060374	0.0591401	0.0165325	0.0612724	0.066526	0.0711679	0.0457619	0.0380191
2019	河南	53717.8	4635.7	23035.6	26046.5	0.104261	8.169	1.87608	12.5056	8.33764	河南	2019	河南	3.2212	3.0934	3.0185	4.0116	15164	11546	5328.95	0.39596	1.42068	666.72	4635.7	51949.3	48.1	0.330346	3913.36	2430.84	231.97	1059.7	86247	783.1	353.83	河南	0.0392159	0.030727	0.0712418	0.0143319	0.0228296	0.00930875	0.060374	0.0591401	0.0165325	0.0612724	0.066526	0.0711679	0.0457619	0.0380191
2018	河南	49935.9	4311.1	22038.6	23586.2	0.108604	8.115	1.64677	12.5009	8.28544	河南	2018	河南	2.9576	2.7846	2.7574	3.8927	13831	10392	5288.69	0.72835	1.44871	692.79	4311.12	48101.2	42.8	0.304478	3778.27	2261.74	214.08	1001.08	82318	729.7	330.59	河南	0.0392159	0.030727	0.0712418	0.0143319	0.0228296	0.00930875	0.060374	0.0591401	0.0165325	0.0612724	0.066526	0.0711679	0.0457619	0.0380191
2017	河南	44824.9	4139.3	20940.3	19745.3	0.111595	8.234	1.5564	12.498	8.19486	河南	2017	河南	2.6692	2.4145	2.7956	3.2809	12719	9212	5273.63	0.52005	1.46763	706.7	4139.29	44496.9	42.9	0.292591	3672.95	2019.92	200.47	916.81	55407	592.8	328.82	河南	0.0392159	0.030727	0.0712418	0.0143319	0.0228296	0.00930875	0.060374	0.0591401	0.0165325	0.0612724	0.066526	0.0711679	0.0457619	0.0380191
2016	河南	40249.3	4063.6	18986.9	17198.8	0.108276	8.204	1.47872	12.4967	8.07667	河南	2016	河南	2.2312	2.0065	1.9922	3.408	11697	8587	5242.92	0.45908	1.51221	715.03	4063.65	40415.1	42.7	0.282995	3600.81	1551.82	187.48	807.06	49145	492.8	317.23	河南	0.0392159	0.030727	0.0712418	0.0143319	0.0228296	0.00930875	0.060374	0.0591401	0.0165325	0.0612724	0.066526	0.0711679	0.0457619	0.0380191
2015	河南	37084.1	4015.6	17947.9	15120.7	0.116427	8.165	1.42015	12.4315	7.95641	河南	2015	河南	2.0534	1.815	1.5105	3.8273	10853	7887	5210.64	0.32608	1.27068	716.09	4015.56	35660.3	42.7	0.279199	3559.76	1248.76	176.69	791.63	47766	419	321.01	河南	0.0392159	0.030727	0.0712418	0.0143319	0.0228296	0.00930875	0.060374	0.0591401	0.0165325	0.0612724	0.066526	0.0711679	0.0457619	0.0380191
2014	河南	34574.8	3988.2	17139.6	13446.9	0.109798	8.063	1.36686	12.4286	7.82481	河南	2014	河南	1.6665	1.5752	1.3224	2.5931	9966	7277	5101.15	0.43224	1.28359	705.75	3988.22	30782.2	41.5	0.277629	3441.74	1036.08	167.97	661.94	33366	314.4	313.23	河南	0.0392159	0.030727	0.0712418	0.0143319	0.0228296	0.00930875	0.060374	0.0591401	0.0165325	0.0612724	0.066526	0.0711679	0.0457619	0.0380191
2013	河南	31632.5	3827.2	15995.4	11809.9	0.11283	8.024	1.2851	12.4285	7.69157	河南	2013	河南	1.4208	1.0506	1.5523	2.4042	8969	6359	4969.11	0.30409	1.30821	696.37	3827.2	26087.5	42.6	0.268296	3236.74	916.52	161.83	629.85	29482	301.7	305.42	河南	0.0392159	0.030727	0.0712418	0.0143319	0.0228296	0.00930875	0.060374	0.0591401	0.0165325	0.0612724	0.066526	0.0711679	0.0457619	0.0380191
2012	河南	28961.9	3577.2	15042.6	10342.2	0.110205	8.4059	1.17065	12.4278	7.54639	河南	2012	河南	0.8368	0.6193	0.9807	1.2937	7963	5686	5205.63	0.23466	1.32321	684.43	3577.15	21450	42.2	0.253995	4510.86	841.13	155.9	551.73	26791	255.3	290.03	河南	0.0392159	0.030727	0.0712418	0.0143319	0.0228296	0.00930875	0.060374	0.0591401	0.0165325	0.0612724	0.066526	0.0711679	0.0457619	0.0380191
2011	河南	26318.7	3349.3	14021.6	8947.8	0.113086	8.3461	1.0752	12.4195	7.3975	河南	2011	河南	0.284	0.1354	0.3811	0.5981	6989	4881	5150.44	0.25731	1.36683	673.71	3349.25	17769	44.1	0.238017	4412.59	839.82	150.01	480.48	19259	189.7	281.82	河南	0.0392159	0.030727	0.0712418	0.0143319	0.0228296	0.00930875	0.060374	0.0591401	0.0165325	0.0612724	0.066526	0.0711679	0.0457619	0.0380191
2022	湖北	52741.7	4982.1	19793.7	27965.8	0.107242	8.373	4.32897	12.6188	8.05226	湖北	2022	湖北	3.888	3.6837	4.131	4.0689	19709	18991	3208.84	0.28852	1.67914	257.98	4982.1	44598.1	40.8	0.649652	6730.96	1952.47	177.26	924.84	160849	700.8	232.39	湖北	0.0392159	0.030727	0.0712418	0.0143319	0.0228296	0.00930875	0.060374	0.0591401	0.0165325	0.0612724	0.066526	0.0711679	0.0457619	0.0380191
2021	湖北	50091.2	4635.2	19332.1	26123.9	0.106086	8.355	3.96286	12.6012	8.01942	湖北	2021	湖北	3.7369	3.5234	3.9088	4.0917	18259	17647	3111.09	0.40687	1.7139	262.62	4635.2	38780.9	40.6	0.607135	6568.5	1878.11	169.97	841.65	155169	646.3	203.56	湖北	0.0392159	0.030727	0.0712418	0.0143319	0.0228296	0.00930875	0.060374	0.0591401	0.0165325	0.0612724	0.066526	0.0711679	0.0457619	0.0380191
2020	湖北	43004.5	4133.2	15933.8	22937.6	0.102915	8.171	3.40779	12.5763	7.90108	湖北	2020	湖北	3.5864	3.3654	3.6958	4.1173	16306	14472	3086.04	0.47929	1.72379	267.32	4133.2	32210.1	40.7	0.546625	6396.04	1854.38	161.69	868.9	110102	570.3	204.05	湖北	0.0392159	0.030727	0.0712418	0.0143319	0.0228296	0.00930875	0.060374	0.0591401	0.0165325	0.0612724	0.066526	0.0711679	0.0457619	0.0380191
2019	湖北	45429	3809.4	18723	22896.5	0.103913	8.169	2.95351	12.5743	8.13485	湖北	2019	湖北	3.444	3.2079	3.4853	4.1489	16391	15328	2968.99	0.33256	1.73081	273.89	3809.4	39667.6	37.3	0.513608	6270.38	1728.57	150.08	828.21	73940	499.7	178.55	湖北	0.0392159	0.030727	0.0712418	0.0143319	0.0228296	0.00930875	0.060374	0.0591401	0.0165325	0.0612724	0.066526	0.0711679	0.0457619	0.0380191
2018	湖北	42022	3548.2	17573.9	20899.9	0.108228	8.115	2.69013	12.5247	7.99301	湖北	2018	湖北	3.1948	2.9256	3.2244	4.0299	14978	13946	2931.9	0.44225	1.79742	295.82	3548.17	35833.4	33.1	0.469552	6134.72	1471.4	143.82	785.55	64106	406.6	165.21	湖北	0.0392159	0.030727	0.0712418	0.0143319	0.0228296	0.00930875	0.060374	0.0591401	0.0165325	0.0612724	0.066526	0.0711679	0.0457619	0.0380191
2017	湖北	37235	3529	15713.9	17992.2	0.105088	8.234	2.58782	12.5043	7.93387	湖北	2017	湖北	2.8528	2.5363	3.1758	3.311	13812	11633	2919.17	0.49753	1.83529	317.93	3528.96	32282.4	32.9	0.46383	5963.49	1347.28	140.09	714.73	46369	263.4	156.57	湖北	0.0392159	0.030727	0.0712418	0.0143319	0.0228296	0.00930875	0.060374	0.0591401	0.0165325	0.0612724	0.066526	0.0711679	0.0457619	0.0380191
2016	湖北	33353	3406.5	14527	15419.5	0.109698	8.204	2.40508	12.4691	7.82389	湖北	2016	湖北	2.3986	2.1555	2.3341	3.3183	12725	10938	2905.57	0.54925	1.88848	327.96	3406.46	30011.7	32.9	0.44609	5830.58	1047.79	140.18	704.59	41822	181.3	152.86	湖北	0.0392159	0.030727	0.0712418	0.0143319	0.0228296	0.00930875	0.060374	0.0591401	0.0165325	0.0612724	0.066526	0.0711679	0.0457619	0.0380191
2015	湖北	30344	3109.9	13569.5	13664.6	0.100536	8.165	2.15058	12.4411	7.70881	湖北	2015	湖北	2.2675	1.9953	1.8908	3.8507	11844	9803	2899.15	0.46146	1.78675	333.87	3109.93	26563.9	32.8	0.402196	5634.3	843.63	141.06	616.57	38781	154.9	149.1	湖北	0.0392159	0.030727	0.0712418	0.0143319	0.0228296	0.00930875	0.060374	0.0591401	0.0165325	0.0612724	0.066526	0.0711679	0.0457619	0.0380191
2014	湖北	28242.1	3001.6	13007.9	12232.6	0.0980513	8.063	2.00523	12.3755	7.57789	湖北	2014	湖北	1.9014	1.7661	1.757	2.6107	10849	8681	2855.32	0.32442	1.81495	348.27	3001.59	22915.3	32.6	0.395384	5414.41	700.23	141.97	483.8	28290	146.3	142.23	湖北	0.0392159	0.030727	0.0712418	0.0143319	0.0228296	0.00930875	0.060374	0.0591401	0.0165325	0.0612724	0.066526	0.0711679	0.0457619	0.0380191
2013	湖北	25378	2883.7	11846.3	10648	0.106445	8.024	1.86545	12.3323	7.4513	湖北	2013	湖北	1.6476	1.2374	1.9704	2.4151	9692	7850	2791.41	0.38358	1.89443	351.93	2883.73	19307.3	29.4	0.381775	5179.03	587.4	142.14	465.34	28760	144.1	130.14	湖北	0.0392159	0.030727	0.0712418	0.0143319	0.0228296	0.00930875	0.060374	0.0591401	0.0165325	0.0612724	0.066526	0.0711679	0.0457619	0.0380191
2012	湖北	22590.9	2674.8	11152.6	8763.5	0.111448	8.4059	1.67994	12.2929	7.27925	湖北	2012	湖北	1.0142	0.8206	1.2584	1.21	8582	7159	2548.91	0.44574	2.00002	354.89	2674.82	15578.3	28.1	0.355643	4760.38	533.31	138.61	419.02	24475	126.3	112.26	湖北	0.0392159	0.030727	0.0712418	0.0143319	0.0228296	0.00930875	0.060374	0.0591401	0.0165325	0.0612724	0.066526	0.0711679	0.0457619	0.0380191
2011	湖北	19942.5	2469.2	9766.1	7707.1	0.117033	8.3461	1.47982	12.2679	7.14795	湖北	2011	湖北	0.3982	0.3517	0.5356	0.3018	7540	6264	2455.69	0.30632	2.08751	354.89	2469.2	12557.3	28	0.337855	4832.72	501.82	134.03	376.23	19035	102	112.26	湖北	0.0392159	0.030727	0.0712418	0.0143319	0.0228296	0.00930875	0.060374	0.0591401	0.0165325	0.0612724	0.066526	0.0711679	0.0457619	0.0380191
2022	湖南	47558.6	4601.4	17899.8	25057.4	0.110708	8.373	3.11337	12.3984	7.85721	湖南	2022	湖南	3.7562	3.4322	4.2003	4.015	19546	18078	2876	0.30513	1.2717	215.87	4601.4	47947.9	39.8	0.567232	4415.8	1613.74	168.51	995.44	92916	818.4	332.52	湖南	0.0392159	0.030727	0.0712418	0.0143319	0.0228296	0.00930875	0.060374	0.0591401	0.0165325	0.0612724	0.066526	0.0711679	0.0457619	0.0380191
2021	湖南	45713.5	4323	17852.5	23537.9	0.113988	8.355	2.87195	12.3964	7.82987	湖南	2021	湖南	3.5367	3.2248	3.8336	4.0167	18295	16951	2875.06	0.32393	1.27378	219.06	4322.92	44979.3	39.7	0.536378	4244.92	1508.75	159.61	949.01	98936	776.7	331.23	湖南	0.0392159	0.030727	0.0712418	0.0143319	0.0228296	0.00930875	0.060374	0.0591401	0.0165325	0.0612724	0.066526	0.0711679	0.0457619	0.0380191
2020	湖南	41542.6	4240.7	15949.2	21352.7	0.117541	8.171	2.74172	12.3931	7.70269	湖南	2020	湖南	3.3203	3.0228	3.4744	4.023	16585	14974	3192.9	0.27096	1.27488	223.73	4240.7	41647.5	39.6	0.531182	4063.13	1513.06	151.03	987.71	78723	701.6	309.88	湖南	0.0392159	0.030727	0.0712418	0.0143319	0.0228296	0.00930875	0.060374	0.0591401	0.0165325	0.0612724	0.066526	0.0711679	0.0457619	0.0380191
2019	湖南	39894.1	3647.2	15401.7	20845.2	0.121811	8.169	2.26728	12.3908	7.71141	湖南	2019	湖南	3.1085	2.8228	3.1181	4.0346	15395	13969	3176.11	0.40669	1.2551	229.01	3647.2	38705.8	38	0.474037	3905.68	1396.12	140.71	978.68	54685	645.5	132.98	湖南	0.0392159	0.030727	0.0712418	0.0143319	0.0228296	0.00930875	0.060374	0.0591401	0.0165325	0.0612724	0.066526	0.0711679	0.0457619	0.0380191
2018	湖南	36329.7	3084.2	13904.1	19341.4	0.123746	8.115	1.84058	12.3886	7.32211	湖南	2018	湖南	2.8681	2.5807	2.8655	3.8219	14093	12721	3164	0.49536	1.27964	242.61	3084.18	35155.2	42	0.40272	3745.54	1255.14	132.68	925.57	48957	520.2	130.82	湖南	0.0392159	0.030727	0.0712418	0.0143319	0.0228296	0.00930875	0.060374	0.0591401	0.0165325	0.0612724	0.066526	0.0711679	0.0457619	0.0380191
2017	湖南	33828.1	2998.4	13459.8	17369.9	0.113899	8.234	1.73205	12.3872	7.27476	湖南	2017	湖南	2.6112	2.2347	2.977	3.1896	12936	11534	3145.87	0.45742	1.33049	245.26	2998.4	31959.2	42.6	0.380355	3592.19	1109.7	127.32	782.42	37916	374	128.56	湖南	0.0392159	0.030727	0.0712418	0.0143319	0.0228296	0.00930875	0.060374	0.0591401	0.0165325	0.0612724	0.066526	0.0711679	0.0457619	0.0380191
2016	湖南	30853.5	2915.6	12942	14995.9	0.115118	8.204	1.61376	12.3812	7.16232	湖南	2016	湖南	2.1769	1.8613	2.198	3.1807	11930	10630	3132.37	0.42326	1.36801	246.44	2915.58	28353.3	41.9	0.367212	3433.77	884.98	122.5	729.75	34050	246.1	126.7	湖南	0.0392159	0.030727	0.0712418	0.0143319	0.0228296	0.00930875	0.060374	0.0591401	0.0165325	0.0612724	0.066526	0.0711679	0.0457619	0.0380191
2015	湖南	28538.6	2747.9	12665.7	13125	0.118044	8.165	1.4385	12.3753	7.03896	湖南	2015	湖南	2.0638	1.7007	1.7447	3.8424	10993	9691	3113.32	0.54947	1.41757	246.54	2747.91	25045.1	41.4	0.344563	3259.77	712.18	118.06	676.24	34075	176	123.91	湖南	0.0392159	0.030727	0.0712418	0.0143319	0.0228296	0.00930875	0.060374	0.0591401	0.0165325	0.0612724	0.066526	0.0711679	0.0457619	0.0380191
2014	湖南	25881.3	2671	11825.1	11385.2	0.111132	8.063	1.35698	12.3726	6.92353	湖南	2014	湖南	1.6727	1.5042	1.5346	2.4799	10060	9025	3101.7	0.58129	1.48069	247.8	2671.01	21242.9	41.2	0.332566	3108.97	587.73	113.63	557.59	26637	150.1	123.83	湖南	0.0392159	0.030727	0.0712418	0.0143319	0.0228296	0.00930875	0.060374	0.0591401	0.0165325	0.0612724	0.066526	0.0711679	0.0457619	0.0380191
2013	湖南	23545.2	2589.2	10913.8	10042.3	0.110118	8.024	1.28261	12.369	6.75589	湖南	2013	湖南	1.4771	1.0346	1.75	2.4425	9029	7833	3084.3	0.50883	1.53712	248.19	2589.18	17841.4	41	0.323501	2998.96	508.57	110.08	516.55	24392	140.2	118.58	湖南	0.0392159	0.030727	0.0712418	0.0143319	0.0228296	0.00930875	0.060374	0.0591401	0.0165325	0.0612724	0.066526	0.0711679	0.0457619	0.0380191
2012	湖南	21207.2	2567.9	9926.7	8712.7	0.108701	8.4059	1.23881	12.3632	6.6034	湖南	2012	湖南	0.9371	0.6339	1.3238	1.2356	8024	6956	2715.78	0.51309	1.59939	249.11	2567.85	14523.2	39.1	0.321834	2857.3	465.11	108.22	447.74	23212	113.2	110.23	湖南	0.0392159	0.030727	0.0712418	0.0143319	0.0228296	0.00930875	0.060374	0.0591401	0.0165325	0.0612724	0.066526	0.0711679	0.0457619	0.0380191
2011	湖南	18915	2420	8883.6	7611.4	0.111981	8.3461	1.13502	12.3553	6.48387	湖南	2011	湖南	0.3268	0.1533	0.6073	0.3902	7082	6138	2762.41	0.40214	1.65696	242.49	2420	11880.9	38.3	0.306894	2906.91	443.53	106.79	394.26	16064	85.4	106.03	湖南	0.0392159	0.030727	0.0712418	0.0143319	0.0228296	0.00930875	0.060374	0.0591401	0.0165325	0.0612724	0.066526	0.0711679	0.0457619	0.0380191
2022	广东	129514	5350.1	52620.7	71542.7	0.0576035	8.373	2.78633	12.3153	8.62984	广东	2022	广东	4.1834	3.9168	4.8544	3.8429	23598	20800	1560.23	0.2608	1.78127	208.74	5350.09	51546.7	27	1.21481	2091.13	4366.51	267.09	1067.57	837276	1099.6	564.51	广东	0.0392159	0.030727	0.0712418	0.0143319	0.0228296	0.00930875	0.060374	0.0591401	0.0165325	0.0612724	0.066526	0.0711679	0.0457619	0.0380191
2021	广东	124720	4984.7	50555.8	69179	0.0608028	8.355	2.58111	12.3149	8.56865	广东	2021	广东	3.9884	3.7413	4.4468	3.9664	22306	20012	1529.21	0.42016	1.7819	212.87	4984.7	52922.7	26.4	1.14515	2034.54	4153.2	253.98	1109.47	872209	1034.1	690.4	广东	0.0392159	0.030727	0.0712418	0.0143319	0.0228296	0.00930875	0.060374	0.0591401	0.0165325	0.0612724	0.066526	0.0711679	0.0457619	0.0380191
2020	广东	111152	4732.7	43868.1	62550.8	0.0645874	8.171	2.42145	12.3099	8.36718	广东	2020	广东	3.7953	3.5694	4.0435	4.0906	20143	17132	1776.46	0.3151	1.78399	219.8	4732.7	49786.2	25.8	1.09636	1953.71	4199.34	240.02	1125.81	709725	1017	615.42	广东	0.0392159	0.030727	0.0712418	0.0143319	0.0228296	0.00930875	0.060374	0.0591401	0.0165325	0.0612724	0.066526	0.0711679	0.0457619	0.0380191
2019	广东	107987	4350.6	43368.2	60268.1	0.0553641	8.169	2.10083	12.3027	8.50173	广东	2019	广东	3.6061	3.3998	3.645	4.2166	18818	16949	1773.4	0.30546	1.77433	225.79	4350.6	46442.3	25.1	1.02775	1858.08	4112.23	205.4	957.68	527390	930.1	1448.04	广东	0.0392159	0.030727	0.0712418	0.0143319	0.0228296	0.00930875	0.060374	0.0591401	0.0165325	0.0612724	0.066526	0.0711679	0.0457619	0.0380191
2018	广东	99945.2	3836.4	41398.5	54710.4	0.05784	8.115	1.81508	12.2909	8.51459	广东	2018	广东	3.3192	3.1244	3.2993	3.9986	17168	15411	1775.21	0.30887	1.7611	231.32	3836.4	41802.3	23.1	0.922778	1757.89	3471.79	196.32	909.78	478082	627.3	1443.1	广东	0.0392159	0.030727	0.0712418	0.0143319	0.0228296	0.00930875	0.060374	0.0591401	0.0165325	0.0612724	0.066526	0.0711679	0.0457619	0.0380191
2017	广东	91648.7	3611.4	38536.6	49500.7	0.050168	8.234	1.68049	12.2995	8.47142	广东	2017	广东	2.9617	2.7591	3.2817	3.0492	15780	13200	1774.61	0.46815	1.75359	258.3	3611.44	37761.8	22.6	0.878224	1638.7	3275.81	192.58	754.4	332652	611.8	1414.77	广东	0.0392159	0.030727	0.0712418	0.0143319	0.0228296	0.00930875	0.060374	0.0591401	0.0165325	0.0612724	0.066526	0.0711679	0.0457619	0.0380191
2016	广东	82163.2	3500.5	35499.2	43163.5	0.053208	8.204	1.63665	12.2926	8.3712	广东	2016	广东	2.48	2.4007	2.365	2.9507	14512	12415	1771.71	0.29745	1.74924	261.02	3500.49	33303.6	23.4	0.859392	1536.17	2982.11	189.29	715.44	259032	566.3	1334.78	广东	0.0392159	0.030727	0.0712418	0.0143319	0.0228296	0.00930875	0.060374	0.0591401	0.0165325	0.0612724	0.066526	0.0711679	0.0457619	0.0380191
2015	广东	74732.4	3189.8	33913.8	37628.9	0.0632922	8.165	1.48952	12.2831	8.27055	广东	2015	广东	2.4095	2.2552	1.9587	3.7379	13360	11103	1771.26	0.58443	1.55539	256.46	3189.76	30343	23.3	0.780799	1457.52	2166.82	185.64	811.9	241176	577.8	1326.2	广东	0.0392159	0.030727	0.0712418	0.0143319	0.0228296	0.00930875	0.060374	0.0591401	0.0165325	0.0612724	0.066526	0.0711679	0.0457619	0.0380191
2014	广东	68173	3038.7	31930.4	33204	0.0609212	8.063	1.40177	12.2648	8.16939	广东	2014	广东	2.0153	1.9963	1.7504	2.5598	12246	10043	1770.99	0.4778	1.60509	249.58	3038.71	26293.9	23.3	0.73805	1384.91	1792.97	179.42	557.59	179953	534.2	1314	广东	0.0392159	0.030727	0.0712418	0.0143319	0.0228296	0.00930875	0.060374	0.0591401	0.0165325	0.0612724	0.066526	0.0711679	0.0457619	0.0380191
2013	广东	62503.4	2876.4	29343	30284	0.070774	8.024	1.33528	12.2205	8.06196	广东	2013	广东	1.8478	1.5333	2.0844	2.4561	11068	8938	1770.76	0.39753	1.62899	243.91	2876.42	22308.4	23.4	0.706051	1349.46	1902.91	170.99	595.28	170430	518.6	1234.84	广东	0.0392159	0.030727	0.0712418	0.0143319	0.0228296	0.00930875	0.060374	0.0591401	0.0165325	0.0612724	0.066526	0.0711679	0.0457619	0.0380191
2012	广东	57007.7	2711.3	27346.1	26950.3	0.0730333	8.4059	1.25457	12.1805	7.97563	广东	2012	广东	1.2706	1.1137	1.4938	1.3831	9999	7990	1874.44	0.47028	1.70163	245.38	2711.32	18751.5	23.6	0.654006	1428.62	1290.86	161.68	539.56	153598	483.6	1187.5	广东	0.0392159	0.030727	0.0712418	0.0143319	0.0228296	0.00930875	0.060374	0.0591401	0.0165325	0.0612724	0.066526	0.0711679	0.0457619	0.0380191
2011	广东	53072.8	2553.2	26161.1	24358.5	0.0626214	8.3461	1.19638	12.1586	7.97171	广东	2011	广东	0.6948	0.6341	0.8097	0.6866	8889	7205	1873.16	0.2358	1.75778	241.3	2553.17	17069.2	24.1	0.615964	1418.72	1219.06	152.73	420.34	128413	418.9	1134.92	广东	0.0392159	0.030727	0.0712418	0.0143319	0.0228296	0.00930875	0.060374	0.0591401	0.0165325	0.0612724	0.066526	0.0711679	0.0457619	0.0380191
2022	广西	26186.1	4270.4	8819.3	13096.3	0.125069	8.373	3.10033	12.0575	7.06894	广西	2022	广西	3.5715	3.4596	3.5601	3.9344	17433	14658	1549.35	0.15452	1.63947	249.2	4270.4	27938.3	40.1	0.702267	3424.98	809.61	140.75	737.07	44691	879.9	211.99	广西	0.0392159	0.030727	0.0712418	0.0143319	0.0228296	0.00930875	0.060374	0.0591401	0.0165325	0.0612724	0.066526	0.0711679	0.0457619	0.0380191
2021	广西	25209.1	4051.3	8513.9	12643.9	0.130508	8.355	2.88307	11.9869	7.06245	广西	2021	广西	3.4066	3.2883	3.3421	3.9157	16363	14165	1434.96	0.33268	1.58954	251.89	4051.3	27910.4	40	0.675676	3237.28	780.6	132.1	757.8	46804	783.6	236.83	广西	0.0392159	0.030727	0.0712418	0.0143319	0.0228296	0.00930875	0.060374	0.0591401	0.0165325	0.0612724	0.066526	0.0711679	0.0457619	0.0380191
2020	广西	22120.9	3645.9	7046.8	11428.1	0.146352	8.171	2.57323	11.7878	6.9511	广西	2020	广西	3.2517	3.1198	3.1324	3.9041	14815	12431	1731.03	0.18332	1.56542	247.85	3645.9	25939	39.8	0.615213	3048.05	734.33	118.42	904.38	34470	700.7	211.61	广西	0.0392159	0.030727	0.0712418	0.0143319	0.0228296	0.00930875	0.060374	0.0591401	0.0165325	0.0612724	0.066526	0.0711679	0.0457619	0.0380191
2019	广西	21237.1	3389.7	7046.4	10801	0.127707	8.169	2.34691	11.7584	6.85678	广西	2019	广西	3.0991	2.9526	2.9248	3.9001	13676	12045	1713.08	0.39871	1.55967	252.04	3389.67	24893.5	44.5	0.583366	2845.51	664.92	107.64	747.21	22687	601.5	126.47	广西	0.0392159	0.030727	0.0712418	0.0143319	0.0228296	0.00930875	0.060374	0.0591401	0.0165325	0.0612724	0.066526	0.0711679	0.0457619	0.0380191
2018	广西	19627.8	3021.1	6692.9	9913.9	0.123632	8.115	2.06011	11.7397	6.95731	广西	2018	广西	2.8925	2.7041	2.7249	3.8193	12435	10617	1706.88	0.568	1.59229	255.05	3021.09	22713	44.5	0.521802	2647.73	629.05	94.22	656.58	20551	475.8	108.25	广西	0.0392159	0.030727	0.0712418	0.0143319	0.0228296	0.00930875	0.060374	0.0591401	0.0165325	0.0612724	0.066526	0.0711679	0.0457619	0.0380191
2017	广西	17790.7	2878.3	6138.3	8774.1	0.131784	8.234	1.93761	11.722	6.8446	广西	2017	广西	2.6194	2.3273	2.7952	3.2644	11325	9437	1669.87	0.31531	1.63186	263.83	2878.3	20499.1	42.9	0.49661	2463.76	565.11	86.67	646.87	15270	296.2	103.53	广西	0.0392159	0.030727	0.0712418	0.0143319	0.0228296	0.00930875	0.060374	0.0591401	0.0165325	0.0612724	0.066526	0.0711679	0.0457619	0.0380191
2016	广西	16116.6	2800.3	5621	7695.3	0.129113	8.204	1.84998	11.6998	6.72599	广西	2016	广西	2.2332	1.9351	2.0221	3.6015	10359	8351	1646.07	0.30664	1.69161	262.14	2800.29	18236.8	42.6	0.482173	2284.89	469.17	81.03	573.48	14858	189.2	95.37	广西	0.0392159	0.030727	0.0712418	0.0143319	0.0228296	0.00930875	0.060374	0.0591401	0.0165325	0.0612724	0.066526	0.0711679	0.0457619	0.0380191
2015	广西	14797.8	2565.5	5391	6841.4	0.122378	8.165	1.67751	11.6784	6.61714	广西	2015	广西	2.0723	1.7633	1.5346	4.0694	9467	7582	1618.79	0.46253	1.59835	259.86	2565.45	16227.8	42.3	0.433144	2107.34	385.75	75.12	497.53	13573	153.8	83.91	广西	0.0392159	0.030727	0.0712418	0.0143319	0.0228296	0.00930875	0.060374	0.0591401	0.0165325	0.0612724	0.066526	0.0711679	0.0457619	0.0380191
2014	广西	13587.8	2413.4	5145.6	6028.8	0.112446	8.063	1.54813	11.6518	6.51501	广西	2014	广西	1.6612	1.5429	1.3998	2.5266	8683	6675	1600	0.35714	1.64122	258.68	2413.44	13843.2	41.8	0.422526	1931.76	313.3	70.19	391.29	9664	108.5	76.21	广西	0.0392159	0.030727	0.0712418	0.0143319	0.0228296	0.00930875	0.060374	0.0591401	0.0165325	0.0612724	0.066526	0.0711679	0.0457619	0.0380191
2013	广西	12448.4	2290.6	4709.3	5448.4	0.115905	8.024	1.44597	11.6207	6.40042	广西	2013	广西	1.4146	1.0697	1.5384	2.3282	7793	6035	1586.37	0.25734	1.79619	255.7	2290.64	11907.7	41.1	0.385685	1735.65	275.47	65.61	371.9	7884	102.6	68.38	广西	0.0392159	0.030727	0.0712418	0.0143319	0.0228296	0.00930875	0.060374	0.0591401	0.0165325	0.0612724	0.066526	0.0711679	0.0457619	0.0380191
2012	广西	11303.6	2126.4	4503.1	4674.1	0.123632	8.4059	1.31576	11.589	6.26758	广西	2012	广西	0.8935	0.6647	1.0458	1.3725	6894	5720	1541.29	0.52957	1.88871	249.04	2126.41	9808.61	41.3	0.359898	2019.54	238.26	62.92	369.07	5900	87.7	63.31	广西	0.0392159	0.030727	0.0712418	0.0143319	0.0228296	0.00930875	0.060374	0.0591401	0.0165325	0.0612724	0.066526	0.0711679	0.0457619	0.0380191
2011	广西	10299.9	2006.4	4241.2	4052.3	0.123703	8.3461	1.2286	11.5607	6.17524	广西	2011	广西	0.3389	0.1998	0.4406	0.6133	6003	4882	1529.24	0.44377	1.94513	242.71	2006.43	7990.66	41.5	0.34699	1952.08	212.65	60.01	314.86	4402	69.9	56.18	广西	0.0392159	0.030727	0.0712418	0.0143319	0.0228296	0.00930875	0.060374	0.0591401	0.0165325	0.0612724	0.066526	0.0711679	0.0457619	0.0380191
2022	海南	6889.6	1417.9	1308.7	4163.1	0.126659	8.373	5.74415	10.6379	5.9197	海南	2022	海南	3.7598	3.7027	3.8326	3.8099	19117	15145	330.17	0.42857	1.08765	38.64	1417.9	3844.86	41.7	2.14121	159.35	200.9	25.81	265.65	13148	204.8	46.13	海南	0.0392159	0.030727	0.0712418	0.0143319	0.0228296	0.00930875	0.060374	0.0591401	0.0165325	0.0612724	0.066526	0.0711679	0.0457619	0.0380191
2021	海南	6504.1	1254.4	1240.8	4008.8	0.132253	8.355	5.06229	10.6224	6.01591	海南	2021	海南	3.5983	3.5274	3.6023	3.8182	18076	15487	326.62	0.32288	1.08566	40.77	1254.44	4013.43	35.6	1.89944	147.3	198.3	24.51	260.72	13632	142.4	62.65	海南	0.0392159	0.030727	0.0712418	0.0143319	0.0228296	0.00930875	0.060374	0.0591401	0.0165325	0.0612724	0.066526	0.0711679	0.0457619	0.0380191
2020	海南	5566.2	1136	1072.2	3358	0.13616	8.171	4.52765	10.6007	5.88249	海南	2020	海南	3.4405	3.3587	3.3724	3.8346	16279	13169	292.21	0.34653	1.09957	42.61	1135.98	3641.95	46	1.74098	139.33	205.91	23.01	268.57	8578	111.2	54.87	海南	0.0392159	0.030727	0.0712418	0.0143319	0.0228296	0.00930875	0.060374	0.0591401	0.0165325	0.0612724	0.066526	0.0711679	0.0457619	0.0380191
2019	海南	5330.8	1079	1083.8	3168.1	0.135263	8.169	4.17775	10.5481	5.74044	海南	2019	海南	3.2875	3.1941	3.1446	3.8558	15113	12418	290.63	0.16667	1.16346	46.26	1079	3372.18	34.9	1.65326	136.81	202.67	20.74	251.4	4423	99.7	18.68	海南	0.0392159	0.030727	0.0712418	0.0143319	0.0228296	0.00930875	0.060374	0.0591401	0.0165325	0.0612724	0.066526	0.0711679	0.0457619	0.0380191
2018	海南	4910.7	986	1053.1	2871.6	0.134636	8.115	3.82975	10.4638	5.67641	海南	2018	海南	3.0972	2.944	3.0023	3.7754	13989	10956	290.48	0.34877	1.26001	48.37	985.96	3713.85	33.3	1.43098	116.72	183.2	18.92	227.71	3292	82.6	17.41	海南	0.0392159	0.030727	0.0712418	0.0143319	0.0228296	0.00930875	0.060374	0.0591401	0.0165325	0.0612724	0.066526	0.0711679	0.0457619	0.0380191
2017	海南	4497.5	962.8	996.4	2538.4	0.137413	8.234	3.64917	10.3315	5.54361	海南	2017	海南	2.7564	2.5339	2.9753	3.0934	12902	9599	289.25	0.24074	1.24507	51.36	962.84	4244.4	32.8	1.40012	108.42	164.83	18.55	198.42	2133	79.6	15.52	海南	0.0392159	0.030727	0.0712418	0.0143319	0.0228296	0.00930875	0.060374	0.0591401	0.0165325	0.0612724	0.066526	0.0711679	0.0457619	0.0380191
2016	海南	4090.2	924.7	904	2261.5	0.130071	8.204	3.46348	10.2477	5.41388	海南	2016	海南	2.3156	2.1009	2.2035	3.2283	11843	8921	289.95	0.19301	1.41685	50.62	924.74	3890.45	31.6	1.30018	96.13	133.21	18.49	179.04	1939	60.2	13.89	海南	0.0392159	0.030727	0.0712418	0.0143319	0.0228296	0.00930875	0.060374	0.0591401	0.0165325	0.0612724	0.066526	0.0711679	0.0457619	0.0380191
2015	海南	3734.2	835.4	882.9	2016	0.132513	8.165	3.03756	10.1984	5.40358	海南	2015	海南	2.3033	1.9226	1.8491	4.3859	10858	8210	263.99	0.49029	1.48068	51.14	835.35	3451.22	32.4	1.13439	74.58	114.25	18.29	164.24	2061	42.2	13.02	海南	0.0392159	0.030727	0.0712418	0.0143319	0.0228296	0.00930875	0.060374	0.0591401	0.0165325	0.0612724	0.066526	0.0711679	0.0457619	0.0380191
2014	海南	3449	793.2	826.5	1829.3	0.133031	8.063	2.8081	10.1659	5.06575	海南	2014	海南	1.7962	1.7099	1.538	2.5503	9913	7029	259.92	0.67065	1.50664	49.46	793.15	3112.23	28.5	1.04529	58.78	85.15	18.06	146.3	1597	29.7	10.89	海南	0.0392159	0.030727	0.0712418	0.0143319	0.0228296	0.00930875	0.060374	0.0591401	0.0165325	0.0612724	0.066526	0.0711679	0.0457619	0.0380191
2013	海南	3115.9	723.6	750.9	1641.4	0.137494	8.024	2.56476	10.1207	4.82109	海南	2013	海南	1.5826	1.2175	1.7337	2.5139	8802	6376	260.93	0.56527	1.5385	47.57	723.6	2697.9	28.9	0.961449	56.6	72.61	17.21	139.03	1331	26	9.63	海南	0.0392159	0.030727	0.0712418	0.0143319	0.0228296	0.00930875	0.060374	0.0591401	0.0165325	0.0612724	0.066526	0.0711679	0.0457619	0.0380191
2012	海南	2789.4	683.9	747.2	1358.3	0.135597	8.4059	2.39312	10.0968	4.6386	海南	2012	海南	1.0294	0.7951	1.2072	1.4798	7816	5572	256.75	0.63636	1.63985	45.53	683.85	2145.38	28.6	0.891211	38.72	60.27	16.83	123.62	1093	21.4	8.59	海南	0.0392159	0.030727	0.0712418	0.0143319	0.0228296	0.00930875	0.060374	0.0591401	0.0165325	0.0612724	0.066526	0.0711679	0.0457619	0.0380191
2011	海南	2463.8	636.6	671.3	1155.9	0.135632	8.3461	2.24328	10.0396	4.29592	海南	2011	海南	0.4556	0.3096	0.5774	0.7163	6801	4860	247.51	0.38328	1.76085	47.73	636.64	1657.23	26.9	0.832566	37.74	53.75	15.67	105.63	765	16.2	7.07	海南	0.0392159	0.030727	0.0712418	0.0143319	0.0228296	0.00930875	0.060374	0.0591401	0.0165325	0.0612724	0.066526	0.0711679	0.0457619	0.0380191
2022	重庆	28576.1	2012.6	11047.4	15516.1	0.0804963	8.373	3.28873	12.1342	7.60882	重庆	2022	重庆	3.8567	3.6776	4.1254	3.9176	19313	16727	669.87	0.34641	2.22216	88.74	2012.6	21997.1	39.3	0.591718	4109.04	981.09	106.61	393.85	66467	406.7	88.36	重庆	0.0392159	0.030727	0.0712418	0.0143319	0.0228296	0.00930875	0.060374	0.0591401	0.0165325	0.0612724	0.066526	0.0711679	0.0457619	0.0380191
2021	重庆	28077.3	1921.9	11217.3	14938.1	0.0840238	8.355	3.07946	12.1233	7.5911	重庆	2021	重庆	3.6494	3.4813	3.7807	3.9418	18100	16096	665.27	0.46477	2.22471	89.05	1921.91	21844.2	38.8	0.575873	3947.31	965.5	100.27	406.26	76206	354.3	85.57	重庆	0.0392159	0.030727	0.0712418	0.0143319	0.0228296	0.00930875	0.060374	0.0591401	0.0165325	0.0612724	0.066526	0.0711679	0.0457619	0.0380191
2020	重庆	25041.4	1803.5	9969.6	13268.3	0.0851582	8.171	2.80558	12.1051	7.38225	重庆	2020	重庆	3.4476	3.2939	3.4391	3.9712	16361	14140	698.32	0.29716	2.25138	89.83	1803.5	20588.3	37.7	0.544693	3856	987.62	91.56	416.76	55377	253	82.5	重庆	0.0392159	0.030727	0.0712418	0.0143319	0.0228296	0.00930875	0.060374	0.0591401	0.0165325	0.0612724	0.066526	0.0711679	0.0457619	0.0380191
2019	重庆	23605.8	1551.6	9392	12662.2	0.0803539	8.169	2.3087	12.0684	7.34575	重庆	2019	重庆	3.2547	3.1103	3.1036	4.0062	15133	13112	697.68	0.33844	2.2843	91.08	1551.6	19815.5	36.5	0.472631	3722.49	916.46	83.49	389.53	43872	243.6	80.9	重庆	0.0392159	0.030727	0.0712418	0.0143319	0.0228296	0.00930875	0.060374	0.0591401	0.0165325	0.0612724	0.066526	0.0711679	0.0457619	0.0380191
2018	重庆	21588.8	1378.7	8842.2	11367.9	0.0807694	8.115	1.94296	11.9671	6.04358	重庆	2018	重庆	3.0153	2.8511	2.856	3.8474	13781	11977	696.94	0.6488	2.34468	93.17	1378.68	18764.6	33.7	0.419712	3580.06	806.09	76.28	366.77	45688	215.8	79.53	重庆	0.0392159	0.030727	0.0712418	0.0143319	0.0228296	0.00930875	0.060374	0.0591401	0.0165325	0.0612724	0.066526	0.0711679	0.0457619	0.0380191
2017	重庆	20066.3	1276.1	8455	10335.2	0.080154	8.234	1.72892	11.9042	6.03189	重庆	2017	重庆	2.7631	2.495	3.0121	3.1957	12638	10936	694.26	0.35346	2.46899	95.46	1276.09	17537	33.7	0.389363	3397.39	744	74.69	347.57	34780	205.5	80.18	重庆	0.0392159	0.030727	0.0712418	0.0143319	0.0228296	0.00930875	0.060374	0.0591401	0.0165325	0.0612724	0.066526	0.0711679	0.0457619	0.0380191
2016	重庆	18023	1237	7765.4	9020.7	0.0869581	8.204	1.62383	11.87	5.90154	重庆	2016	重庆	2.3389	2.1403	2.1154	3.401	11549	9954	690.6	0.6271	2.52764	96.14	1236.98	16048.1	33.6	0.377546	3233.87	600.33	73.25	347.99	42738	137.1	78.69	重庆	0.0392159	0.030727	0.0712418	0.0143319	0.0228296	0.00930875	0.060374	0.0591401	0.0165325	0.0612724	0.066526	0.0711679	0.0457619	0.0380191
2015	重庆	16040.5	1067.7	7208	7764.8	0.087376	8.165	1.36045	11.8533	5.76331	重庆	2015	重庆	2.2184	1.9746	1.7158	3.9365	10505	8938	687.19	0.59463	2.5477	97.72	1067.72	14353.2	33.6	0.328026	3069.96	514.58	71.66	331.33	38914	89.6	78.14	重庆	0.0392159	0.030727	0.0712418	0.0143319	0.0228296	0.00930875	0.060374	0.0591401	0.0165325	0.0612724	0.066526	0.0711679	0.0457619	0.0380191
2014	重庆	14623.8	990.8	6774.6	6858.5	0.0882523	8.063	1.21272	11.755	5.64509	重庆	2014	重庆	1.8471	1.7557	1.5788	2.6363	9490	7983	677.26	0.57494	2.64496	97.26	990.75	12285.4	33.6	0.306029	2908.69	407.26	69.16	291.62	24312	76	78.31	重庆	0.0392159	0.030727	0.0712418	0.0143319	0.0228296	0.00930875	0.060374	0.0591401	0.0165325	0.0612724	0.066526	0.0711679	0.0457619	0.0380191
2013	重庆	13027.6	941.2	5988.6	6097.7	0.0920687	8.024	1.12941	11.7187	5.41477	重庆	2013	重庆	1.5986	1.2527	1.782	2.4074	8493	6971	675.18	0.36987	2.76799	96.64	941.24	10435.2	33	0.287872	2576.14	359.23	65.94	281.94	24828	66.6	76.12	重庆	0.0392159	0.030727	0.0712418	0.0143319	0.0228296	0.00930875	0.060374	0.0591401	0.0165325	0.0612724	0.066526	0.0711679	0.0457619	0.0380191
2012	重庆	11595.4	879.7	5308.1	5407.6	0.0841496	8.4059	1.02914	11.7013	5.27658	重庆	2012	重庆	1.0002	0.8539	1.1614	1.1905	7526	6035	702.97	0.55254	2.85741	96.02	879.67	8736.17	33	0.26874	2439.97	331.03	62.36	256.35	20364	51.8	73.8	重庆	0.0392159	0.030727	0.0712418	0.0143319	0.0228296	0.00930875	0.060374	0.0591401	0.0165325	0.0612724	0.066526	0.0711679	0.0457619	0.0380191
2011	重庆	10161.2	794.1	4571.3	4795.8	0.0773897	8.3461	0.908306	11.6832	5.13991	重庆	2011	重庆	0.4189	0.4038	0.4746	0.3677	6605	5414	692.88	0.34375	2.82889	95.58	794.14	7473.38	33.1	0.249645	2376.69	311.81	56.78	198.91	15525	38.7	70.37	重庆	0.0392159	0.030727	0.0712418	0.0143319	0.0228296	0.00930875	0.060374	0.0591401	0.0165325	0.0612724	0.066526	0.0711679	0.0457619	0.0380191
2022	四川	56610.2	5965.5	20591.4	30053.3	0.114088	8.373	2.82693	12.9126	8.28956	四川	2022	四川	3.7157	3.503	3.9727	3.9261	18672	17199	2975.74	0.33853	2.07733	204.37	5965.5	44058.1	44.1	0.599676	12028.6	2297.79	205.15	1359.32	135507	1553.2	293.65	四川	0.0392159	0.030727	0.0712418	0.0143319	0.0228296	0.00930875	0.060374	0.0591401	0.0165325	0.0612724	0.066526	0.0711679	0.0457619	0.0380191
2021	四川	54088	5662	19949.7	28476.2	0.118593	8.355	2.65719	12.8965	8.34213	四川	2021	四川	3.5315	3.304	3.7061	3.9399	17575	16444	2784.14	0.25019	2.06872	207.16	5661.86	41564.2	45	0.581815	11501.8	2204.91	192.08	1330.1	146936	1207	273.15	四川	0.0392159	0.030727	0.0712418	0.0143319	0.0228296	0.00930875	0.060374	0.0591401	0.0165325	0.0612724	0.066526	0.0711679	0.0457619	0.0380191
2020	四川	48501.6	5556.9	17505.6	25439.2	0.119601	8.171	2.54456	12.885	8.2123	四川	2020	四川	3.3482	3.1076	3.4486	3.9605	15929	14953	2992.24	0.36443	2.07192	210.82	5556.58	39248.6	45.4	0.578808	10974.6	2273.57	180.09	1339.36	108386	1109.2	256.56	四川	0.0392159	0.030727	0.0712418	0.0143319	0.0228296	0.00930875	0.060374	0.0591401	0.0165325	0.0612724	0.066526	0.0711679	0.0457619	0.0380191
2019	四川	46363.8	4807.5	17187.9	24368.3	0.124507	8.169	2.11624	12.7281	8.32303	四川	2019	四川	3.1711	2.9122	3.1953	3.9823	14670	14056	2954.09	0.40797	2.07013	222.77	4807.5	38179.5	44.4	0.509441	10463.6	2148.66	166.17	1288.42	82066	981.1	205.8	四川	0.0392159	0.030727	0.0712418	0.0143319	0.0228296	0.00930875	0.060374	0.0591401	0.0165325	0.0612724	0.066526	0.0711679	0.0457619	0.0380191
2018	四川	42902.1	4427.4	16056.9	22417.7	0.135039	8.115	1.85982	12.7117	8.25956	四川	2018	四川	2.943	2.6615	2.9583	3.8451	13331	12723	2932.54	0.60971	2.08853	235.21	4427.43	35156.1	43.5	0.47261	9961.81	1956.52	156.47	1310.89	87372	851.9	198.62	四川	0.0392159	0.030727	0.0712418	0.0143319	0.0228296	0.00930875	0.060374	0.0591401	0.0165325	0.0612724	0.066526	0.0711679	0.0457619	0.0380191
2017	四川	37905.1	4262.5	14569.2	19073.5	0.117672	8.234	1.74019	12.7067	8.14218	四川	2017	四川	2.678	2.3187	3.0154	3.2514	12227	11397	2873.1	0.60686	2.16615	241.95	4262.51	31902.1	42.1	0.455904	9456.96	1937.64	149.97	1023.13	64006	737.2	188.44	四川	0.0392159	0.030727	0.0712418	0.0143319	0.0228296	0.00930875	0.060374	0.0591401	0.0165325	0.0612724	0.066526	0.0711679	0.0457619	0.0380191
2016	四川	33138.5	3900.6	13450.1	15787.8	0.123452	8.204	1.65219	12.6889	8.02829	四川	2016	四川	2.2541	1.97	2.1654	3.3538	11203	10192	2813.55	0.58962	2.22477	248.98	3900.6	28812	42	0.420474	8980.33	1703.52	144.66	988.71	62445	579.9	183.08	四川	0.0392159	0.030727	0.0712418	0.0143319	0.0228296	0.00930875	0.060374	0.0591401	0.0165325	0.0612724	0.066526	0.0711679	0.0457619	0.0380191
2015	四川	30342	3661	13192.5	13488.6	0.123594	8.165	1.50421	12.6622	7.91063	四川	2015	四川	2.1548	1.8208	1.7654	3.9651	10247	9251	2735.09	0.4059	2.14575	249.83	3660.96	25525.9	41.5	0.396305	8510.33	1267.3	138.79	926.65	64953	462.6	174.81	四川	0.0392159	0.030727	0.0712418	0.0143319	0.0228296	0.00930875	0.060374	0.0591401	0.0165325	0.0612724	0.066526	0.0711679	0.0457619	0.0380191
2014	四川	28891.3	3524.7	13082.7	12283.9	0.121618	8.063	1.35234	12.6435	7.78643	四川	2014	四川	1.7382	1.6258	1.5982	2.3639	9348	8301	2666.32	0.40052	2.25419	250.19	3524.74	23318.6	40.6	0.383751	8159.15	1060.63	132.83	826.59	47120	228.7	169.57	四川	0.0392159	0.030727	0.0712418	0.0143319	0.0228296	0.00930875	0.060374	0.0591401	0.0165325	0.0612724	0.066526	0.0711679	0.0457619	0.0380191
2013	四川	26518	3257.4	12418.9	10841.7	0.11924	8.024	1.2593	12.6176	7.6186	四川	2013	四川	1.5304	1.1403	1.7671	2.3882	8381	7365	2616.54	0.33558	2.37073	251.14	3257.42	20326.1	39.3	0.354643	7792.14	914.68	127.08	741.78	46171	188.7	163.51	四川	0.0392159	0.030727	0.0712418	0.0143319	0.0228296	0.00930875	0.060374	0.0591401	0.0165325	0.0612724	0.066526	0.0711679	0.0457619	0.0380191
2012	四川	23922.4	3142.6	11231.1	9548.8	0.120152	8.4059	1.18627	12.5896	7.47969	四川	2012	四川	1.0013	0.7436	1.265	1.3731	7432	6265	2662.65	0.42165	2.52288	253.03	3142.55	17040	38.5	0.343245	6744.39	819.53	122.37	654.95	42218	166.2	155.96	四川	0.0392159	0.030727	0.0712418	0.0143319	0.0228296	0.00930875	0.060374	0.0591401	0.0165325	0.0612724	0.066526	0.0711679	0.0457619	0.0380191
2011	四川	21050.9	2854.6	10014.4	8181.9	0.116729	8.3461	1.05198	12.5541	7.34536	四川	2011	四川	0.4016	0.2902	0.5856	0.435	6505	5458	2600.75	0.4716	2.68976	251.23	2854.62	14222.2	38.2	0.314734	6536.19	778.7	113.93	545.7	28446	129.9	148.57	四川	0.0392159	0.030727	0.0712418	0.0143319	0.0228296	0.00930875	0.060374	0.0591401	0.0165325	0.0612724	0.066526	0.0711679	0.0457619	0.0380191
2022	贵州	20010.4	2862.3	7052.7	10095.4	0.118289	8.373	2.81784	12.253	7.00878	贵州	2022	贵州	3.3801	3.5506	2.8523	3.7661	13707	13172	1185.17	0.4598	1.91019	75.41	2862.3	17191.3	40.7	0.563565	8223.38	504.24	89.47	692.15	29382	430.7	164.23	贵州	0.0392159	0.030727	0.0712418	0.0143319	0.0228296	0.00930875	0.060374	0.0591401	0.0165325	0.0612724	0.066526	0.0711679	0.0457619	0.0380191
2021	贵州	19458.6	2730.9	6850.5	9877.2	0.130722	8.355	2.66709	12.2414	7.02296	贵州	2021	贵州	3.226	3.3408	2.713	3.7869	12856	12557	1270.21	0.43711	2.00446	75.98	2730.92	18115.2	40.4	0.530659	7899.87	496.26	88.16	730.74	39267	372.2	167.95	贵州	0.0392159	0.030727	0.0712418	0.0143319	0.0228296	0.00930875	0.060374	0.0591401	0.0165325	0.0612724	0.066526	0.0711679	0.0457619	0.0380191
2020	贵州	17860.4	2539.9	6263	9057.5	0.178467	8.171	2.41145	12.239	6.85277	贵州	2020	贵州	3.0794	3.1324	2.582	3.8081	11642	10818	1165.49	0.43359	2.12029	78.78	2539.88	18694.7	39.7	0.488663	7577	511.77	84.02	1024.31	34971	224.3	160.46	贵州	0.0392159	0.030727	0.0712418	0.0143319	0.0228296	0.00930875	0.060374	0.0591401	0.0165325	0.0612724	0.066526	0.0711679	0.0457619	0.0380191
2019	贵州	16769.3	2280.6	5971.5	8517.3	0.167918	8.169	2.08296	12.2294	6.7567	贵州	2019	贵州	2.9351	2.9266	2.4566	3.833	10756	10222	1153.99	0.31064	2.20621	83.18	2280.56	18115.1	38.2	0.439291	7321.37	489.26	76.57	998.9	24729	177.2	104.94	贵州	0.0392159	0.030727	0.0712418	0.0143319	0.0228296	0.00930875	0.060374	0.0591401	0.0165325	0.0612724	0.066526	0.0711679	0.0457619	0.0380191
2018	贵州	15353.2	2156	5506.2	7691	0.132183	8.115	1.87678	12.1905	6.19522	贵州	2018	贵州	2.7691	2.6739	2.4133	3.7301	9716	9170	1132.24	0.61227	2.30457	89.48	2156.02	17953.5	30.5	0.414996	7052.95	444.74	68.75	664.84	19456	164.1	98.41	贵州	0.0392159	0.030727	0.0712418	0.0143319	0.0228296	0.00930875	0.060374	0.0591401	0.0165325	0.0612724	0.066526	0.0711679	0.0457619	0.0380191
2017	贵州	13605.4	2032.3	4970.9	6602.3	0.132693	8.234	1.71837	12.1776	6.64053	贵州	2017	贵州	2.5146	2.2777	2.5844	3.1699	8869	8299	1114.12	0.57276	2.59434	95.65	2032.27	15503.9	36.3	0.378134	6814.62	389.31	62.77	612.05	12559	131.9	95.11	贵州	0.0392159	0.030727	0.0712418	0.0143319	0.0228296	0.00930875	0.060374	0.0591401	0.0165325	0.0612724	0.066526	0.0711679	0.0457619	0.0380191
2016	贵州	11792.4	1861.8	4468.7	5461.8	0.14766	8.204	1.52656	12.1633	6.51959	贵州	2016	贵州	2.0945	1.807	1.827	3.5303	8090	7533	1088.07	0.51497	2.74602	103.67	1861.81	13204	36.5	0.349682	6556.46	320.69	57.39	629.38	10425	97.9	85.25	贵州	0.0392159	0.030727	0.0712418	0.0143319	0.0228296	0.00930875	0.060374	0.0591401	0.0165325	0.0612724	0.066526	0.0711679	0.0457619	0.0380191
2015	贵州	10541	1642	4026.7	4872.3	0.135616	8.165	1.29592	12.1357	6.38249	贵州	2015	贵州	1.9329	1.6098	1.3274	4.1001	7387	6645	1065.43	0.5254	2.14857	103.69	1641.98	10945.5	35.4	0.309783	6297.78	257.8	50.09	534.26	14115	72.8	80.12	贵州	0.0392159	0.030727	0.0712418	0.0143319	0.0228296	0.00930875	0.060374	0.0591401	0.0165325	0.0612724	0.066526	0.0711679	0.0457619	0.0380191
2014	贵州	9173.1	1281.5	3582.4	4309.3	0.126225	8.063	0.964908	12.0956	6.23754	贵州	2014	贵州	1.5462	1.399	1.1408	2.769	6671	5970	981.83	0.55928	2.2415	101.29	1281.52	9025.75	35.3	0.239035	6021.33	213.06	46.04	447.19	10107	51.6	71.27	贵州	0.0392159	0.030727	0.0712418	0.0143319	0.0228296	0.00930875	0.060374	0.0591401	0.0165325	0.0612724	0.066526	0.0711679	0.0457619	0.0380191
2013	贵州	7973.1	999.3	3171	3802.7	0.129859	8.024	0.737858	12.0585	6.02102	贵州	2013	贵州	1.2122	0.8959	1.2546	2.1793	5898	5291	926.9	0.55275	2.40482	97.42	999.34	7373.6	34.4	0.191622	5816.53	181.62	41.9	400.31	7915	44.5	61.89	贵州	0.0392159	0.030727	0.0712418	0.0143319	0.0228296	0.00930875	0.060374	0.0591401	0.0165325	0.0612724	0.066526	0.0711679	0.0457619	0.0380191
2012	贵州	6742.2	862.7	2716.8	3162.8	0.131318	8.4059	0.629331	12.0109	5.88694	贵州	2012	贵州	0.7587	0.4987	0.8992	1.3621	5159	4355	1214.57	0.40712	2.46886	98.17	862.69	5717.8	35.1	0.171639	3513.55	150.22	38.38	361.87	6059	36.7	54.46	贵州	0.0392159	0.030727	0.0712418	0.0143319	0.0228296	0.00930875	0.060374	0.0591401	0.0165325	0.0612724	0.066526	0.0711679	0.0457619	0.0380191
2011	贵州	5615.6	699.6	2258.9	2657.1	0.123797	8.3461	0.508707	11.9692	5.74428	贵州	2011	贵州	0.1847	0.0306	0.2751	0.5292	4499	3857	1201.19	0.53058	2.69963	94.08	699.56	4235.92	35.2	0.145435	3249.82	131.81	34.41	278.47	3386	31.3	47.99	贵州	0.0392159	0.030727	0.0712418	0.0143319	0.0228296	0.00930875	0.060374	0.0591401	0.0165325	0.0612724	0.066526	0.0711679	0.0457619	0.0380191
2022	云南	28556.1	4001.9	10120.3	14433.9	0.132606	8.373	2.92842	12.6638	7.24687	云南	2022	云南	3.4988	3.3951	3.4759	3.8732	15147	13309	2035.26	0.45917	2.44732	183.38	4001.9	27608.3	42.9	0.573596	11636.9	725.02	110.03	888.43	39497	521.8	165.74	云南	0.0392159	0.030727	0.0712418	0.0143319	0.0228296	0.00930875	0.060374	0.0591401	0.0165325	0.0612724	0.066526	0.0711679	0.0457619	0.0380191
2021	云南	27161.6	3831.3	9537.2	13793.1	0.138633	8.355	2.76671	12.6145	7.23447	云南	2021	云南	3.339	3.2074	3.2806	3.8725	14197	12386	1988.24	0.40885	2.48592	187.33	3831.3	25682.1	42.8	0.552978	11092.9	690.2	104.41	919.74	41167	462.6	173.75	云南	0.0392159	0.030727	0.0712418	0.0143319	0.0228296	0.00930875	0.060374	0.0591401	0.0165325	0.0612724	0.066526	0.0711679	0.0457619	0.0380191
2020	云南	24555.7	3611.8	8387.5	12556.5	0.157747	8.171	2.51075	12.5861	7.14061	云南	2020	云南	3.1848	3.0246	3.0945	3.8778	12842	11069	1978.07	0.3431	2.50818	196.65	3611.8	24694.4	42.8	0.525704	10543.1	756.45	96.42	1100.13	28943	404	163.98	云南	0.0392159	0.030727	0.0712418	0.0143319	0.0228296	0.00930875	0.060374	0.0591401	0.0165325	0.0612724	0.066526	0.0711679	0.0457619	0.0380191
2019	云南	23223.8	3037.7	8060.4	12125.7	0.16502	8.169	2.03981	12.4777	7.17411	云南	2019	云南	3.0346	2.8443	2.9112	3.8874	11902	10260	1922.49	0.34457	2.55631	204.03	3037.69	22928.8	41.5	0.446212	10047.7	742.1	86.4	1117.2	22324	372.2	120.42	云南	0.0392159	0.030727	0.0712418	0.0143319	0.0228296	0.00930875	0.060374	0.0591401	0.0165325	0.0612724	0.066526	0.0711679	0.0457619	0.0380191
2018	云南	20880.6	2498.7	7267.5	11114.5	0.138633	8.115	1.66224	12.4409	6.85393	云南	2018	云南	2.8579	2.6229	2.7884	3.7606	10768	9123	1898.07	0.62664	2.55829	217.37	2498.67	21132.6	38.2	0.370438	9517.65	667.94	76.47	842.2	20340	305.9	104.94	云南	0.0392159	0.030727	0.0712418	0.0143319	0.0228296	0.00930875	0.060374	0.0591401	0.0165325	0.0612724	0.066526	0.0711679	0.0457619	0.0380191
2017	云南	18486	2338.4	6317.8	9829.8	0.118121	8.234	1.53651	12.3989	6.7901	云南	2017	云南	2.5627	2.2354	2.8285	3.1608	9862	8027	1851.42	0.57329	1.92127	231.94	2338.37	18936	38.1	0.351741	9004.38	612.66	70.59	674.82	14230	118.3	102.34	云南	0.0392159	0.030727	0.0712418	0.0143319	0.0228296	0.00930875	0.060374	0.0591401	0.0165325	0.0612724	0.066526	0.0711679	0.0457619	0.0380191
2016	云南	16369	2225.5	5747.4	8396.1	0.142048	8.204	1.43082	12.3802	6.66721	云南	2016	云南	2.1734	1.8537	2.0317	3.4865	9020	7331	1809.39	0.50351	1.97249	235.58	2225.49	16119.4	38	0.334865	8540.74	529.23	65.66	712.92	12032	95	95.26	云南	0.0392159	0.030727	0.0712418	0.0143319	0.0228296	0.00930875	0.060374	0.0591401	0.0165325	0.0612724	0.066526	0.0711679	0.0457619	0.0380191
2015	云南	14960	2079.3	5491.7	7389	0.136122	8.165	1.29217	12.3716	6.54722	云南	2015	云南	2.0376	1.6796	1.5879	4.0367	8242	6830	1757.71	0.59068	2.04577	231.87	2079.31	13500.6	37.7	0.311176	8074.45	434.6	61.46	641.52	11658	91.8	91.45	云南	0.0392159	0.030727	0.0712418	0.0143319	0.0228296	0.00930875	0.060374	0.0591401	0.0165325	0.0612724	0.066526	0.0711679	0.0457619	0.0380191
2014	云南	14041.7	2007.4	5376.5	6657.7	0.133946	8.063	1.20922	12.3476	6.43583	云南	2014	云南	1.6405	1.4722	1.443	2.5554	7456	6030	1708.97	0.5805	2.12839	226.86	2007.43	11498.5	37.1	0.298911	7734.45	375.99	57.7	594.45	8124	76.7	87.12	云南	0.0392159	0.030727	0.0712418	0.0143319	0.0228296	0.00930875	0.060374	0.0591401	0.0165325	0.0612724	0.066526	0.0711679	0.0457619	0.0380191
2013	云南	12825.5	1878.5	5000.5	5946.5	0.131568	8.024	1.11217	12.3147	6.28842	云南	2013	云南	1.379	0.9559	1.5355	2.4915	6724	5247	1660.27	0.4535	2.23056	219.02	1878.46	9968.3	35.3	0.2793	7393.81	320.77	54.86	538.97	6804	76.9	82.37	云南	0.0392159	0.030727	0.0712418	0.0143319	0.0228296	0.00930875	0.060374	0.0591401	0.0165325	0.0612724	0.066526	0.0711679	0.0457619	0.0380191
2012	云南	11097.4	1640.4	4458.4	4998.6	0.145158	8.4059	0.953325	12.2971	6.14911	云南	2012	云南	0.8443	0.5278	1.1196	1.3891	5930	5045	1677.9	0.36805	2.32188	210.21	1640.43	7831.13	35.2	0.25037	6175.57	271.3	51.22	518.6	5853	65.2	73.78	云南	0.0392159	0.030727	0.0712418	0.0143319	0.0228296	0.00930875	0.060374	0.0591401	0.0165325	0.0612724	0.066526	0.0711679	0.0457619	0.0380191
2011	云南	9523.1	1396.6	3811.4	4315.1	0.139883	8.3461	0.796615	12.2762	5.98519	云南	2011	云南	0.2491	0.0747	0.4839	0.3981	5170	4424	1634.24	0.38873	2.46726	200.47	1396.6	6191	35	0.219587	5866.84	241.1	48.76	409.8	4199	50.3	66.78	云南	0.0392159	0.030727	0.0712418	0.0143319	0.0228296	0.00930875	0.060374	0.0591401	0.0165325	0.0612724	0.066526	0.0711679	0.0457619	0.0380191
2022	西藏	2150.2	186.2	787.1	1176.8	0.143414	8.373	1.22202	11.7023	4.84103	西藏	2022	西藏	3.4601	3.2881	3.7284	3.4681	18209	11139	304.63	0.41772	0.444238	2.83	186.2	1573.19	40.5	0.667292	898.47	39.44	4.25	371.87	2127	25.9	5.35	西藏	0.0392159	0.030727	0.0712418	0.0143319	0.0228296	0.00930875	0.060374	0.0591401	0.0165325	0.0612724	0.066526	0.0711679	0.0457619	0.0380191
2021	西藏	2080.2	164.1	757.3	1158.8	0.168001	8.355	1.1006	11.6963	4.95653	西藏	2021	西藏	3.2805	3.0923	3.458	3.5413	16932	10577	297.88	0.15493	0.460128	4.33	164.12	1918.53	42.9	0.614537	804.18	39.98	4.13	340.54	1929	37.2	4.79	西藏	0.0392159	0.030727	0.0712418	0.0143319	0.0228296	0.00930875	0.060374	0.0591401	0.0165325	0.0612724	0.066526	0.0711679	0.0457619	0.0380191
2020	西藏	1902.7	150.3	714.9	1037.5	0.187904	8.171	0.995991	11.6805	4.87443	西藏	2020	西藏	3.1053	2.9018	3.1938	3.6167	14598	8917	282.82	0.3913	0.471722	4.4	150.3	2236.05	44.1	0.56748	711.91	39.81	3.86	415.44	1702	24.8	3.63	西藏	0.0392159	0.030727	0.0712418	0.0143319	0.0228296	0.00930875	0.060374	0.0591401	0.0165325	0.0612724	0.066526	0.0711679	0.0457619	0.0380191
2019	西藏	1697.8	138.2	635.6	924	0.20341	8.169	0.900745	11.5517	4.77153	西藏	2019	西藏	2.9379	2.7114	2.9321	3.6965	12951	8418	275.94	0.05455	0.485725	4.82	138.19	2121.49	43	0.523331	622.55	36.65	3.62	445.01	1020	16.1	2.48	西藏	0.0392159	0.030727	0.0712418	0.0143319	0.0228296	0.00930875	0.060374	0.0591401	0.0165325	0.0612724	0.066526	0.0711679	0.0457619	0.0380191
2018	西藏	1548.4	128.3	582.7	837.3	0.185033	8.115	0.834486	11.4905	4.56643	西藏	2018	西藏	2.7433	2.4982	2.6716	3.6833	11450	7452	264.53	0.82474	0.495401	5.19	128.34	2169.21	38.7	0.488941	528.5	33.45	3.57	364.64	755	12.1	1.59	西藏	0.0392159	0.030727	0.0712418	0.0143319	0.0228296	0.00930875	0.060374	0.0591401	0.0165325	0.0612724	0.066526	0.0711679	0.0457619	0.0380191
2017	西藏	1349	118.2	469.6	761.2	0.141557	8.234	0.765654	11.4002	4.44617	西藏	2017	西藏	2.4557	2.0929	2.7379	3.141	10330	6691	261.23	0.75781	0.485672	5.53	118.15	1975.6	39.3	0.478252	419.11	28.01	3.56	238.09	420	5.9	1.34	西藏	0.0392159	0.030727	0.0712418	0.0143319	0.0228296	0.00930875	0.060374	0.0591401	0.0165325	0.0612724	0.066526	0.0711679	0.0457619	0.0380191
2016	西藏	1173	110.5	390.4	672.1	0.153201	8.204	0.743254	11.3156	4.35671	西藏	2016	西藏	2.0473	1.6721	2.0253	3.3266	9094	6070	251.53	0.75172	0.414318	5.91	110.52	1596.05	43.1	0.431693	323.27	22.25	3.5	243.28	245	4.3	1.21	西藏	0.0392159	0.030727	0.0712418	0.0143319	0.0228296	0.00930875	0.060374	0.0591401	0.0165325	0.0612724	0.066526	0.0711679	0.0457619	0.0380191
2015	西藏	1043	93.6	341.8	607.6	0.14497	8.165	0.636027	11.2689	4.27805	西藏	2015	西藏	1.8638	1.3987	1.5775	3.9197	8244	5580	247.8	0.45763	0.370653	6.03	93.61	1295.68	44.6	0.418825	466.09	17.36	3.42	200.27	198	0	1.28	西藏	0.0392159	0.030727	0.0712418	0.0143319	0.0228296	0.00930875	0.060374	0.0591401	0.0165325	0.0612724	0.066526	0.0711679	0.0457619	0.0380191
2014	西藏	939.7	88.1	310.3	541.3	0.142757	8.063	0.579013	11.2315	4.11904	西藏	2014	西藏	1.4391	1.2667	1.0876	2.647	7359	4822	244.03	0.87597	0.397849	5.34	88.11	1069.23	48.6	0.398063	779.76	12.76	3.35	169.24	146	0	1.18	西藏	0.0392159	0.030727	0.0712418	0.0143319	0.0228296	0.00930875	0.060374	0.0591401	0.0165325	0.0612724	0.066526	0.0711679	0.0457619	0.0380191
2013	西藏	828.2	81.2	270.8	476.2	0.146691	8.024	0.530087	11.1647	3.93378	西藏	2013	西藏	1.151	0.7409	1.1284	2.5465	6553	4102	239.27	0.40271	0.436439	5.7	81.21	876	46.9	0.369402	725.99	11.43	3.36	148.79	121	0	1.08	西藏	0.0392159	0.030727	0.0712418	0.0143319	0.0228296	0.00930875	0.060374	0.0591401	0.0165325	0.0612724	0.066526	0.0711679	0.0457619	0.0380191
2012	西藏	710.2	75.3	226.1	408.8	0.157532	8.4059	0.487738	11.0852	3.75887	西藏	2012	西藏	0.6853	0.3286	0.7107	1.8165	5698	3406	251.04	0.47917	0.473685	4.99	75.25	670.52	47.1	0.350981	42.84	9.54	3.35	142.62	133	0	1.02	西藏	0.0392159	0.030727	0.0712418	0.0143319	0.0228296	0.00930875	0.060374	0.0591401	0.0165325	0.0612724	0.066526	0.0711679	0.0457619	0.0380191
2011	西藏	611.5	69.8	195.6	346.1	0.166902	8.3461	0.458998	11.0526	3.68888	西藏	2011	西藏	0.1622	0.0337	0.3016	0.3333	4886	3146	245.31	0.22472	0.511895	4.79	69.83	516.31	48	0.327794	42.3	7.6	3.24	126.53	142	0	0.87	西藏	0.0392159	0.030727	0.0712418	0.0143319	0.0228296	0.00930875	0.060374	0.0591401	0.0165325	0.0612724	0.066526	0.0711679	0.0457619	0.0380191
2022	陕西	32838.2	2575	15937.2	14326	0.108447	8.373	3.23169	12.1314	7.19316	陕西	2022	陕西	3.8076	3.7267	3.7901	4.1513	15704	14094	1161.63	0.32044	1.70268	194.16	2575.34	29422	39.3	0.643507	8624.42	1102.02	130.44	733.21	79375	533.6	156.92	陕西	0.0392159	0.030727	0.0712418	0.0143319	0.0228296	0.00930875	0.060374	0.0591401	0.0165325	0.0612724	0.066526	0.0711679	0.0457619	0.0380191
2021	陕西	30121.7	2409.9	14019	13692.9	0.11439	8.355	2.99961	12.1195	7.13306	陕西	2021	陕西	3.6125	3.5085	3.5508	4.084	14745	13158	1192.47	0.32532	1.72312	200.7	2409.9	27217.4	38.1	0.604521	8350.48	1052.37	128.33	694.26	86272	353.8	154.29	陕西	0.0392159	0.030727	0.0712418	0.0143319	0.0228296	0.00930875	0.060374	0.0591401	0.0165325	0.0612724	0.066526	0.0711679	0.0457619	0.0380191
2020	陕西	26014.1	2267.7	11222	12524.4	0.125162	8.171	2.74689	12.1044	6.96819	陕西	2020	陕西	3.4204	3.2953	3.3173	4.0211	13316	11376	1336.81	0.48506	1.74243	201.91	2267.7	28059.1	37.8	0.572431	8163.74	1102.74	121	742.25	60524	346.6	142.07	陕西	0.0392159	0.030727	0.0712418	0.0143319	0.0228296	0.00930875	0.060374	0.0591401	0.0165325	0.0612724	0.066526	0.0711679	0.0457619	0.0380191
2019	陕西	25793.2	1991.1	11779.5	12022.6	0.119643	8.169	2.31618	12.1011	7.02367	陕西	2019	陕西	3.2289	3.0821	3.0914	3.9636	12326	10935	1285.16	0.33995	1.7723	202.52	1991.1	26954	37	0.507782	8039.84	1033.49	112.2	684.18	44101	319.5	137.82	陕西	0.0392159	0.030727	0.0712418	0.0143319	0.0228296	0.00930875	0.060374	0.0591401	0.0165325	0.0612724	0.066526	0.0711679	0.0457619	0.0380191
2018	陕西	23941.9	1830.2	11215.3	10896.4	0.118208	8.115	2.04287	12.0846	6.97747	陕西	2018	陕西	2.9595	2.8105	2.7715	3.7931	11213	10071	1274.99	0.72202	1.76963	229.64	1830.19	26296.6	35.5	0.471228	7917.95	970.54	105.48	626.79	41479	284.1	133.6	陕西	0.0392159	0.030727	0.0712418	0.0143319	0.0228296	0.00930875	0.060374	0.0591401	0.0165325	0.0612724	0.066526	0.0711679	0.0457619	0.0380191
2017	陕西	21473.5	1741.1	10114.1	9618.3	0.112845	8.234	1.88004	12.0691	6.87296	陕西	2017	陕西	2.6685	2.4648	2.76	3.1747	10265	9306	1263.09	0.47965	1.8122	232.15	1741.07	23819.4	35.3	0.450456	7765.02	869.01	106.94	545.4	34554	241	130.85	陕西	0.0392159	0.030727	0.0712418	0.0143319	0.0228296	0.00930875	0.060374	0.0591401	0.0165325	0.0612724	0.066526	0.0711679	0.0457619	0.0380191
2016	陕西	19045.8	1696.1	8906.5	8443.2	0.123776	8.204	1.77314	12.058	6.77685	陕西	2016	陕西	2.2937	2.1117	2.0287	3.376	9396	8568	1251.39	0.57608	1.91543	233.05	1696.1	20825.2	33.7	0.427605	7571.21	713.97	107.63	543.3	48455	188	118.68	陕西	0.0392159	0.030727	0.0712418	0.0143319	0.0228296	0.00930875	0.060374	0.0591401	0.0165325	0.0612724	0.066526	0.0711679	0.0457619	0.0380191
2015	陕西	17898.8	1599.7	8664.6	7634.5	0.118961	8.165	1.62065	12.044	6.66339	陕西	2015	陕西	2.1612	1.9492	1.5795	3.9185	8689	7901	1236.77	0.62448	1.51841	231.95	1599.74	18582.2	34.7	0.413728	7288.32	572.45	109.97	520.58	33350	118.5	110.24	陕西	0.0392159	0.030727	0.0712418	0.0143319	0.0228296	0.00930875	0.060374	0.0591401	0.0165325	0.0612724	0.066526	0.0711679	0.0457619	0.0380191
2014	陕西	17402.5	1566.9	9045	6790.6	0.112548	8.063	1.52869	12.0266	6.52956	陕西	2014	陕西	1.7873	1.7325	1.39	2.69	7932	7252	1226.49	0.56281	1.58843	230.19	1566.85	17191.9	33.7	0.404009	7039.06	476.75	109.96	445.97	22820	105.4	109.02	陕西	0.0392159	0.030727	0.0712418	0.0143319	0.0228296	0.00930875	0.060374	0.0591401	0.0165325	0.0612724	0.066526	0.0711679	0.0457619	0.0380191
2013	陕西	15905.4	1463.5	8418	6023.9	0.114492	8.024	1.3951	12.0152	6.38873	陕西	2013	陕西	1.4837	1.236	1.4594	2.3455	7092	6488	1209.94	0.47541	1.67496	241.73	1463.49	14884.1	32.3	0.372083	6784.91	417.45	107.76	419.62	20836	96.4	113.01	陕西	0.0392159	0.030727	0.0712418	0.0143319	0.0228296	0.00930875	0.060374	0.0591401	0.0165325	0.0612724	0.066526	0.0711679	0.0457619	0.0380191
2012	陕西	14142.4	1314.8	7612.3	5215.3	0.113259	8.4059	1.213	11.9917	6.25556	陕西	2012	陕西	0.9824	0.8362	0.9861	1.4588	6285	5797	1277.18	0.36903	1.7798	239.8	1314.84	12044.5	32.6	0.328126	9512.32	365.33	102.63	376.45	14908	83.3	142.49	陕西	0.0392159	0.030727	0.0712418	0.0143319	0.0228296	0.00930875	0.060374	0.0591401	0.0165325	0.0612724	0.066526	0.0711679	0.0457619	0.0380191
2011	陕西	12175.1	1187.4	6484.3	4503.4	0.11389	8.3461	1.04129	11.9315	6.09762	陕西	2011	陕西	0.4096	0.3781	0.2974	0.7174	5484	5091	1274.34	0.38348	1.92116	207.27	1187.39	9431.08	36.1	0.295093	9407.09	343.72	96.48	333.79	11662	64.9	131.32	陕西	0.0392159	0.030727	0.0712418	0.0143319	0.0228296	0.00930875	0.060374	0.0591401	0.0165325	0.0612724	0.066526	0.0711679	0.0457619	0.0380191
2022	甘肃	11121.4	1499.7	3928.3	5693.4	0.176528	8.373	2.34947	11.9655	6.55962	甘肃	2022	甘肃	3.3977	3.5265	2.9301	3.7669	12165	11494	1349.48	0.25661	1.61402	77.13	1499.7	7872.3	41.1	0.384373	11505.1	490.9	64.81	751.51	22490	416.8	108.92	甘肃	0.0392159	0.030727	0.0712418	0.0143319	0.0228296	0.00930875	0.060374	0.0591401	0.0165325	0.0612724	0.066526	0.0711679	0.0457619	0.0380191
2021	甘肃	10225.5	1364.8	3451.2	5409.5	0.182772	8.355	2.09927	11.9613	6.59016	甘肃	2021	甘肃	3.2217	3.3044	2.7907	3.7171	11433	11206	1298.94	0.58638	1.67639	77.05	1364.8	7150.14	41.4	0.351881	10829.5	490.32	61.34	737.04	26056	364	114.01	甘肃	0.0392159	0.030727	0.0712418	0.0143319	0.0228296	0.00930875	0.060374	0.0591401	0.0165325	0.0612724	0.066526	0.0711679	0.0457619	0.0380191
2020	甘肃	8979.7	1188.1	2824.8	4966.7	0.186345	8.171	1.75997	11.9573	6.46319	甘肃	2020	甘肃	3.055	3.0887	2.6535	3.6736	10344	9923	1338.6	0.35895	1.7173	80.36	1188.1	6435.77	40.9	0.312146	10100	485.19	58.11	775.83	20991	336	104.15	甘肃	0.0392159	0.030727	0.0712418	0.0143319	0.0228296	0.00930875	0.060374	0.0591401	0.0165325	0.0612724	0.066526	0.0711679	0.0457619	0.0380191
2019	甘肃	8718.3	1059.3	2862.4	4796.6	0.181385	8.169	1.526	11.928	6.46925	甘肃	2019	甘肃	2.8914	2.8731	2.5174	3.6316	9629	9694	1328.86	0.50461	1.76244	80.88	1059.3	5970.1	40	0.286358	9574.74	444.32	52.49	716.76	14894	321.9	61.69	甘肃	0.0392159	0.030727	0.0712418	0.0143319	0.0228296	0.00930875	0.060374	0.0591401	0.0165325	0.0612724	0.066526	0.0711679	0.0457619	0.0380191
2018	甘肃	8104.1	926.1	2761.6	4416.4	0.179827	8.115	1.31139	11.8722	6.47713	甘肃	2018	甘肃	2.6682	2.6129	2.2752	3.5654	8804	9065	1337.54	0.68974	1.79454	83.17	926.05	5600.47	36.4	0.255012	9090.65	398.98	48.36	678.35	13958	277.9	59.08	甘肃	0.0392159	0.030727	0.0712418	0.0143319	0.0228296	0.00930875	0.060374	0.0591401	0.0165325	0.0612724	0.066526	0.0711679	0.0457619	0.0380191
2017	甘肃	7336.7	859.8	2515.8	3961.2	0.157603	8.234	1.19198	11.8654	6.54635	甘肃	2017	甘肃	2.4378	2.2738	2.4039	3.041	8076	8030	1331.43	0.48597	1.85874	84.49	859.75	5827.75	40.4	0.238804	8580.49	366.38	46.62	520.79	9672	196.4	55.85	甘肃	0.0392159	0.030727	0.0712418	0.0143319	0.0228296	0.00930875	0.060374	0.0591401	0.0165325	0.0612724	0.066526	0.0711679	0.0457619	0.0380191
2016	甘肃	6907.9	800.8	2483.5	3623.7	0.154951	8.204	1.06183	11.8709	6.47466	甘肃	2016	甘肃	2.0411	1.8928	1.7266	3.1024	7457	7487	1317.51	0.60664	1.96922	93.42	800.75	9663.99	40.4	0.222581	7864.73	307.66	45.72	488.1	7975	105.4	54.22	甘肃	0.0392159	0.030727	0.0712418	0.0143319	0.0228296	0.00930875	0.060374	0.0591401	0.0165325	0.0612724	0.066526	0.0711679	0.0457619	0.0380191
2015	甘肃	6556.6	733.4	2505.4	3317.8	0.168018	8.165	0.985252	11.8498	6.3808	甘肃	2015	甘肃	1.9978	1.6967	1.2525	4.3464	6936	6830	1306.72	0.57704	1.40352	97.92	733.37	8754.23	41.2	0.207171	7702.23	256.89	45.05	497.05	6912	60.8	54.04	甘肃	0.0392159	0.030727	0.0712418	0.0143319	0.0228296	0.00930875	0.060374	0.0591401	0.0165325	0.0612724	0.066526	0.0711679	0.0457619	0.0380191
2014	甘肃	6518.4	695.8	2823.3	2999.4	0.144077	8.063	0.894842	11.8356	6.26454	甘肃	2014	甘肃	1.5976	1.481	1.0729	2.936	6277	6148	1297.06	0.49703	1.48321	97.6	695.77	7884.13	40.5	0.195904	7567.08	208.44	45.23	366.17	5097	38.7	51.26	甘肃	0.0392159	0.030727	0.0712418	0.0143319	0.0228296	0.00930875	0.060374	0.0591401	0.0165325	0.0612724	0.066526	0.0711679	0.0457619	0.0380191
2013	甘肃	6014.5	658.1	2674	2682.4	0.150059	8.024	0.817295	11.8026	6.05772	甘肃	2013	甘肃	1.2839	0.9677	1.142	2.586	5589	5654	1284.08	0.51087	1.56291	94.71	658.1	6527.9	40.5	0.184743	7388.78	180.15	44.3	346.58	4737	34	50.36	甘肃	0.0392159	0.030727	0.0712418	0.0143319	0.0228296	0.00930875	0.060374	0.0591401	0.0165325	0.0612724	0.066526	0.0711679	0.0457619	0.0380191
2012	甘肃	5393.1	590.9	2493.3	2308.9	0.146813	8.4059	0.714835	11.7845	5.93092	甘肃	2012	甘肃	0.7629	0.5472	0.6898	1.6079	4931	4834	1297.58	0.48067	1.65448	92.13	590.94	5145.03	39.5	0.166203	8244.68	158.77	43.11	302.37	3662	16.7	47.85	甘肃	0.0392159	0.030727	0.0712418	0.0143319	0.0228296	0.00930875	0.060374	0.0591401	0.0165325	0.0612724	0.066526	0.0711679	0.0457619	0.0380191
2011	甘肃	4816.9	525.6	2288.6	2002.7	0.132679	8.3461	0.624334	11.7256	5.78383	甘肃	2011	甘肃	0.1884	0.0499	0.1276	0.7561	4278	4273	1291.82	0.5619	1.76661	87.24	525.6	3965.79	39.8	0.14792	8096.76	140.93	40.53	237.66	2383	16	45.05	甘肃	0.0392159	0.030727	0.0712418	0.0143319	0.0228296	0.00930875	0.060374	0.0591401	0.0165325	0.0612724	0.066526	0.0711679	0.0457619	0.0380191
2022	青海	3623.3	379.2	1591	1653	0.139299	8.373	2.47253	11.382	5.05369	青海	2022	青海	3.3035	3.3071	2.8975	4.0218	14456	12516	222.01	0.31432	1.16476	4.71	379.2	3446.7	47.5	0.656784	1865.57	106.39	8.09	275.13	5276	87.2	14.55	青海	0.0392159	0.030727	0.0712418	0.0143319	0.0228296	0.00930875	0.060374	0.0591401	0.0165325	0.0612724	0.066526	0.0711679	0.0457619	0.0380191
2021	青海	3385.1	353.6	1364.7	1666.7	0.135372	8.355	2.28307	11.3639	5.16992	青海	2021	青海	3.1388	3.1122	2.7712	3.9086	13604	13300	217.75	0.60802	1.18355	4.89	353.6	3730.2	47.8	0.613493	1702.2	106.89	7.71	251.05	6591	57.2	14.48	青海	0.0392159	0.030727	0.0712418	0.0143319	0.0228296	0.00930875	0.060374	0.0591401	0.0165325	0.0612724	0.066526	0.0711679	0.0457619	0.0380191
2020	青海	3009.8	338	1143.2	1528.6	0.144761	8.171	2.13966	11.3519	5.08016	青海	2020	青海	2.9823	2.9206	2.6467	3.7958	12342	12134	219.25	0.2993	1.16282	5.45	338	3841.6	47.5	0.599034	1607.76	103.63	7.41	279.8	4693	50.1	13.94	青海	0.0392159	0.030727	0.0712418	0.0143319	0.0228296	0.00930875	0.060374	0.0591401	0.0165325	0.0612724	0.066526	0.0711679	0.0457619	0.0380191
2019	青海	2941.1	301.9	1153.9	1485.3	0.173899	8.169	1.86975	11.3357	5.14982	青海	2019	青海	2.8265	2.729	2.5275	3.6919	11499	11343	213.33	0.36415	1.14311	6.19	301.9	4375.4	46.8	0.552806	1408.13	98.44	7.32	324.09	3046	44.2	7.14	青海	0.0392159	0.030727	0.0712418	0.0143319	0.0228296	0.00930875	0.060374	0.0591401	0.0165325	0.0612724	0.066526	0.0711679	0.0457619	0.0380191
2018	青海	2748	268.1	1093.7	1386.2	0.162587	8.115	1.61725	11.3161	5.11379	青海	2018	青海	2.6312	2.5169	2.3531	3.5143	10393	10352	214.04	0.82081	1.18039	8.32	268.1	4167.05	50.4	0.488111	1251.66	87.65	7.03	267.85	2668	34.4	6.55	青海	0.0392159	0.030727	0.0712418	0.0143319	0.0228296	0.00930875	0.060374	0.0591401	0.0165325	0.0612724	0.066526	0.0711679	0.0457619	0.0380191
2017	青海	2465.1	238.4	975.7	1251	0.152322	8.234	1.39502	11.3009	4.70863	青海	2017	青海	2.402	2.1567	2.5109	3.0142	9462	9903	206.61	0.58994	1.20106	8.67	238.41	3883.55	49.1	0.435793	1134.06	80.2	6.7	233.12	1580	14.2	6.42	青海	0.0392159	0.030727	0.0712418	0.0143319	0.0228296	0.00930875	0.060374	0.0591401	0.0165325	0.0612724	0.066526	0.0711679	0.0457619	0.0380191
2016	青海	2258.2	221.2	867.7	1169.3	0.152381	8.204	1.25481	11.2719	4.61512	青海	2016	青海	2.0038	1.7773	1.8226	3.0811	8664	9222	202.35	0.8144	1.21631	8.76	221.19	3528.05	37.7	0.402869	1014.42	68.75	6.19	232.35	1357	11.8	5.94	青海	0.0392159	0.030727	0.0712418	0.0143319	0.0228296	0.00930875	0.060374	0.0591401	0.0165325	0.0612724	0.066526	0.0711679	0.0457619	0.0380191
2015	青海	2011	208.9	761.1	1041	0.13491	8.165	1.14434	11.2331	4.50866	青海	2015	青海	1.9515	1.5959	1.365	4.1914	7933	8566	196.99	0.7424	1.23029	10.13	208.93	3210.63	37.8	0.380021	898.7	56.3	5.75	204.41	1217	8.3	5.91	青海	0.0392159	0.030727	0.0712418	0.0143319	0.0228296	0.00930875	0.060374	0.0591401	0.0165325	0.0612724	0.066526	0.0711679	0.0457619	0.0380191
2014	青海	1847.7	215.9	714.8	917	0.141039	8.063	1.15721	11.1941	4.39692	青海	2014	青海	1.4593	1.3924	1.084	2.3623	7283	8235	182.49	0.4523	1.25584	9.74	215.93	2861.23	37.5	0.395521	863.32	46.09	5.29	190.04	619	4.6	4.96	青海	0.0392159	0.030727	0.0712418	0.0143319	0.0228296	0.00930875	0.060374	0.0591401	0.0165325	0.0612724	0.066526	0.0711679	0.0457619	0.0380191
2013	青海	1713.3	204.7	681	827.6	0.130035	8.024	1.07	11.1579	4.27388	青海	2013	青海	1.1801	0.8818	1.1342	2.2482	6462	7506	186.9	0.35105	1.35362	9.8	204.72	2361.1	35.9	0.373536	794.41	39.02	5.07	159.69	502	3.7	4.5	青海	0.0392159	0.030727	0.0712418	0.0143319	0.0228296	0.00930875	0.060374	0.0591401	0.0165325	0.0612724	0.066526	0.0711679	0.0457619	0.0380191
2012	青海	1528.5	174.2	620.2	734.1	0.115879	8.4059	0.885436	11.0972	4.08766	青海	2012	青海	0.6147	0.4712	0.5185	1.263	5594	6613	251.67	0.56359	1.27408	9.3	174.24	1883.42	30.6	0.319193	856.5	32.4	4.87	134.31	527	2.6	4.46	青海	0.0392159	0.030727	0.0712418	0.0143319	0.0228296	0.00930875	0.060374	0.0591401	0.0165325	0.0612724	0.066526	0.0711679	0.0457619	0.0380191
2011	青海	1370.4	152.6	553.1	664.6	0.108262	8.3461	0.759276	11.071	3.97029	青海	2011	青海	0.1833	0.0196	0.0676	0.9342	4806	5619	251.67	0.14816	1.25392	8.27	152.62	1435.58	32.3	0.287196	840.82	27.89	4.57	104.74	538	1.8	4.07	青海	0.0392159	0.030727	0.0712418	0.0143319	0.0228296	0.00930875	0.060374	0.0591401	0.0165325	0.0612724	0.066526	0.0711679	0.0457619	0.0380191
2022	宁夏	5104.6	407.5	2439.1	2258	0.154221	8.373	3.45273	10.5544	5.16821	宁夏	2022	宁夏	3.4739	3.6589	3.0715	3.6123	16430	12825	560.57	0.3688	1.79294	36.88	407.5	3204.29	39.4	0.360238	2666.45	215.83	17.25	244.88	12452	75.5	33.35	宁夏	0.0392159	0.030727	0.0712418	0.0143319	0.0228296	0.00930875	0.060374	0.0591401	0.0165325	0.0612724	0.066526	0.0711679	0.0457619	0.0380191
2021	宁夏	4588.2	364.6	2099.2	2124.4	0.16974	8.355	3.08615	10.5341	5.03435	宁夏	2021	宁夏	3.2823	3.4275	2.8445	3.6137	15337	13536	563.78	0.28659	1.79852	37.46	364.62	2907.7	38.6	0.3263	2567.89	211.14	16.11	242.37	12885	70.2	40.63	宁夏	0.0392159	0.030727	0.0712418	0.0143319	0.0228296	0.00930875	0.060374	0.0591401	0.0165325	0.0612724	0.066526	0.0711679	0.0457619	0.0380191
2020	宁夏	3956.3	338.1	1629.3	1989	0.171208	8.171	2.78554	10.516	5.1801	宁夏	2020	宁夏	3.1002	3.2045	2.6272	3.6152	13889	11724	552.53	0.17902	1.82308	38.06	338.1	2845.11	40.5	0.303433	2471.53	210.71	14.67	253.45	7710	61.7	36.08	宁夏	0.0392159	0.030727	0.0712418	0.0143319	0.0228296	0.00930875	0.060374	0.0591401	0.0165325	0.0612724	0.066526	0.0711679	0.0457619	0.0380191
2019	宁夏	3748.5	280	1587.1	1881.4	0.15168	8.169	2.24295	10.5071	5.2486	宁夏	2019	宁夏	2.9231	2.9904	2.4155	3.6235	12858	11465	538.29	0.25086	1.82387	38.44	279.96	2735.68	39.4	0.258205	2388.1	197.67	13.52	218.16	5555	54.2	16.12	宁夏	0.0392159	0.030727	0.0712418	0.0143319	0.0228296	0.00930875	0.060374	0.0591401	0.0165325	0.0612724	0.066526	0.0711679	0.0457619	0.0380191
2018	宁夏	3510.2	279.4	1488.1	1742.7	0.15437	8.115	2.14392	10.4746	4.4006	宁夏	2018	宁夏	2.7292	2.7425	2.2527	3.5514	11708	10790	523.45	0.56516	1.87266	38.37	279.39	3049.81	39.5	0.254257	2301.07	182.92	12.53	219.06	5658	42.4	15.05	宁夏	0.0392159	0.030727	0.0712418	0.0143319	0.0228296	0.00930875	0.060374	0.0591401	0.0165325	0.0612724	0.066526	0.0711679	0.0457619	0.0380191
2017	宁夏	3200.3	250.6	1406	1543.7	0.162	8.234	1.87927	10.4505	4.33336	宁夏	2017	宁夏	2.5559	2.4242	2.5221	3.0524	10738	9982	511.45	0.64794	1.87094	40.8	250.62	3728.38	40.3	0.235117	2214.84	165.29	12.11	222.39	4244	18.6	14.63	宁夏	0.0392159	0.030727	0.0712418	0.0143319	0.0228296	0.00930875	0.060374	0.0591401	0.0165325	0.0612724	0.066526	0.0711679	0.0457619	0.0380191
2016	宁夏	2781.4	241	1179.7	1360.7	0.160449	8.204	1.73158	10.4323	4.237	宁夏	2016	宁夏	2.1236	2.0592	1.7962	2.9312	9852	9138	515.15	0.61347	1.92726	40.72	241	3794.25	40.8	0.228538	2136.54	133.89	11.71	201.29	2677	9.9	14.16	宁夏	0.0392159	0.030727	0.0712418	0.0143319	0.0228296	0.00930875	0.060374	0.0591401	0.0165325	0.0612724	0.066526	0.0711679	0.0457619	0.0380191
2015	宁夏	2579.4	236.8	1116.8	1225.8	0.146044	8.165	1.64743	10.4115	4.13996	宁夏	2015	宁夏	2.147	1.9035	1.3487	4.4018	9119	8415	506.53	0.76325	1.36231	40.09	236.82	3505.45	38.1	0.221382	2057.2	103.31	11.5	166.27	1865	7.8	13.79	宁夏	0.0392159	0.030727	0.0712418	0.0143319	0.0228296	0.00930875	0.060374	0.0591401	0.0165325	0.0612724	0.066526	0.0711679	0.0457619	0.0380191
2014	宁夏	2473.9	216.9	1113.7	1143.4	0.156979	8.063	1.46287	10.3506	4.17439	宁夏	2014	宁夏	1.6526	1.6718	1.1428	2.5155	8410	7676	498.91	0.35661	1.38589	39.67	216.92	3173.79	37.1	0.20377	1959.81	83.92	11.14	157.05	1424	6.6	13.56	宁夏	0.0392159	0.030727	0.0712418	0.0143319	0.0228296	0.00930875	0.060374	0.0591401	0.0165325	0.0612724	0.066526	0.0711679	0.0457619	0.0380191
2013	宁夏	2327.7	210.7	1059.5	1057.5	0.161933	8.024	1.37507	10.2596	3.91202	宁夏	2013	宁夏	1.3674	1.1508	1.2902	2.2232	7599	6740	498.56	0.53236	1.43031	40.44	210.72	2651.1	35.4	0.193709	1709.44	72.7	10.45	149.38	1211	7.7	13.84	宁夏	0.0392159	0.030727	0.0712418	0.0143319	0.0228296	0.00930875	0.060374	0.0591401	0.0165325	0.0612724	0.066526	0.0711679	0.0457619	0.0380191
2012	宁夏	2131	189	992.5	949.5	0.161738	8.4059	1.20026	10.1857	3.83945	宁夏	2012	宁夏	0.8713	0.7678	0.9034	1.1546	6776	5558	491.35	0.39723	1.49433	39.44	189.03	2096.86	35	0.169322	1851.24	62.69	9.64	139.8	844	7.3	12.75	宁夏	0.0392159	0.030727	0.0712418	0.0143319	0.0228296	0.00930875	0.060374	0.0591401	0.0165325	0.0612724	0.066526	0.0711679	0.0457619	0.0380191
2011	宁夏	1931.8	175	919.8	837	0.15893	8.3461	1.10208	10.1067	3.71601	宁夏	2011	宁夏	0.3131	0.3227	0.2316	0.4296	5931	4909	477.59	0.35427	1.56851	38.24	175	1644.74	35.1	0.152518	1910.04	55.34	8.79	112.19	613	6.5	12.01	宁夏	0.0392159	0.030727	0.0712418	0.0143319	0.0228296	0.00930875	0.060374	0.0591401	0.0165325	0.0612724	0.066526	0.0711679	0.0457619	0.0380191
2022	新疆	18042.7	2653.9	7412.3	7976.4	0.138996	8.373	5.02208	12.3155	8.39638	新疆	2022	新疆	3.3832	3.4591	3.111	3.6277	16550	12169	6534.69	0.23777	2.11135	243.68	2653.92	13327.1	43	0.408832	2613.44	681.3	61.14	950.09	20528	399.4	218.72	新疆	0.0392159	0.030727	0.0712418	0.0143319	0.0228296	0.00930875	0.060374	0.0591401	0.0165325	0.0612724	0.066526	0.0711679	0.0457619	0.0380191
2021	新疆	16311.6	2359.1	6295.9	7656.6	0.158	8.355	4.646	12.2892	6.19685	新疆	2021	新疆	3.2318	3.2795	2.9226	3.6351	15575	12821	6666.39	0.34812	2.13207	240.69	2359.1	12385.8	43.1	0.389578	2407.07	685.69	55.56	849.55	21178	302.8	269.92	新疆	0.0392159	0.030727	0.0712418	0.0143319	0.0228296	0.00930875	0.060374	0.0591401	0.0165325	0.0612724	0.066526	0.0711679	0.0457619	0.0380191
2020	新疆	13800.7	1981.3	4786.7	7032.8	0.20384	8.171	3.83313	12.2511	6.04192	新疆	2020	新疆	3.0835	3.1022	2.7385	3.6488	14056	10778	4893.35	0.54974	2.14376	248.23	1981.28	10770.3	43.3	0.334108	2202.31	681.91	48.67	1127.88	12763	235.6	217.37	新疆	0.0392159	0.030727	0.0712418	0.0143319	0.0228296	0.00930875	0.060374	0.0591401	0.0165325	0.0612724	0.066526	0.0711679	0.0457619	0.0380191
2019	新疆	13597.1	1781.8	4784.4	7030.9	0.18388	8.169	3.38221	12.1768	6.19502	新疆	2019	新疆	2.9434	2.9348	2.5631	3.663	13122	10318	4959.89	0.42997	2.21228	257.76	1781.75	9268.73	41	0.306062	2008.1	654	42.7	977.41	8652	267.4	124.83	新疆	0.0392159	0.030727	0.0712418	0.0143319	0.0228296	0.00930875	0.060374	0.0591401	0.0165325	0.0612724	0.066526	0.0711679	0.0457619	0.0380191
2018	新疆	12809.4	1692.1	4657.2	6460.1	0.150276	8.115	3.13887	12.1498	5.71933	新疆	2018	新疆	2.7184	2.6735	2.3294	3.5737	11975	9421	4883.46	0.67279	2.22158	254.99	1692.09	9042.66	26.8	0.295112	1688.11	577.09	37.49	753.25	9658	195.8	119.54	新疆	0.0392159	0.030727	0.0712418	0.0143319	0.0228296	0.00930875	0.060374	0.0591401	0.0165325	0.0612724	0.066526	0.0711679	0.0457619	0.0380191
2017	新疆	11159.9	1551.8	4096.2	5511.9	0.132081	8.234	2.7887	12.1299	5.64862	新疆	2017	新疆	2.4869	2.2882	2.491	3.1356	11045	8713	4952.29	0.78817	2.23089	250.74	1551.84	12089.1	26.3	0.278633	1420.22	523.48	34.6	612.49	8094	161.6	111.13	新疆	0.0392159	0.030727	0.0712418	0.0143319	0.0228296	0.00930875	0.060374	0.0591401	0.0165325	0.0612724	0.066526	0.0711679	0.0457619	0.0380191
2016	新疆	9630.8	1473.2	3446.1	4711.6	0.173266	8.204	2.62994	12.1122	5.5483	新疆	2016	新疆	2.0872	1.9032	1.9011	3.0331	10183	8277	4982.03	0.62673	2.32011	250.19	1473.17	10287.5	25.7	0.262444	1256.27	439.29	31.99	717.02	7116	119.4	108.16	新疆	0.0392159	0.030727	0.0712418	0.0143319	0.0228296	0.00930875	0.060374	0.0591401	0.0165325	0.0612724	0.066526	0.0711679	0.0457619	0.0380191
2015	新疆	9306.9	1409.7	3446.1	4451.2	0.159096	8.165	2.42992	12.091	5.4476	新疆	2015	新疆	2.0549	1.7201	1.486	4.194	9425	7698	4944.92	0.61396	2.07907	248.09	1409.66	10813	25.2	0.285926	1128.88	367.43	30.47	605.34	8761	112.7	104.07	新疆	0.0392159	0.030727	0.0712418	0.0143319	0.0228296	0.00930875	0.060374	0.0591401	0.0165325	0.0612724	0.066526	0.0711679	0.0457619	0.0380191
2014	新疆	9264.5	1406.7	3829.3	4028.5	0.143852	8.063	2.32917	12.0752	5.37389	新疆	2014	新疆	1.6367	1.5128	1.3487	2.5691	8724	7365	4831.89	0.5746	2.16684	236.98	1406.71	9447.74	25.1	0.289029	1054.59	317.41	29.04	477.27	5238	57.5	96.52	新疆	0.0392159	0.030727	0.0712418	0.0143319	0.0228296	0.00930875	0.060374	0.0591401	0.0165325	0.0612724	0.066526	0.0711679	0.0457619	0.0380191
2013	新疆	8392.6	1326.6	3479.9	3586.2	0.126314	8.024	2.10473	12.0445	5.18066	新疆	2013	新疆	1.434	1.0144	1.4639	2.7648	7847	7103	4769.89	0.69157	2.19057	203.22	1326.56	7732.3	23.3	0.290612	992.85	273.49	27.84	387.42	4998	54.4	83.92	新疆	0.0392159	0.030727	0.0712418	0.0143319	0.0228296	0.00930875	0.060374	0.0591401	0.0165325	0.0612724	0.066526	0.0711679	0.0457619	0.0380191
2012	新疆	7411.8	1204.1	3325.9	2881.9	0.134331	8.4059	1.8742	12.0192	5.05433	新疆	2012	新疆	0.8245	0.6088	0.8514	1.4876	6876	6154	4029.07	0.54983	2.37354	192.7	1204.1	6158.78	23.2	0.267368	541.9	235.56	26.87	365.39	3439	46.4	75.81	新疆	0.0392159	0.030727	0.0712418	0.0143319	0.0228296	0.00930875	0.060374	0.0591401	0.0165325	0.0612724	0.066526	0.0711679	0.0457619	0.0380191
2011	新疆	6532	1047.2	3093.4	2391.4	0.130265	8.3461	1.60692	11.9521	4.98429	新疆	2011	新疆	0.2034	0.1292	0.236	0.3892	5853	5105	3884.57	0.82739	2.49092	183.68	1047.2	4632.14	24.2	0.242995	458.73	203.62	25.87	297.59	2642	34.9	71.65	新疆	0.0392159	0.030727	0.0712418	0.0143319	0.0228296	0.00930875	0.060374	0.0591401	0.0165325	0.0612724	0.066526	0.0711679	0.0457619	0.0380191
[truncated: 4 more columns]
